# Supplementary material for: ent-Rosane diterpenoids from Euphorbia milii showing an Epstein–Barr virus lytic replication assay
Source: Royal Society of Chemistry journal article supplement (doi:10.1039/c7ra08877a), 2017-01-01
Supplement: c7ra08877a1.pdf [file c7ra08877a1.pdf]

## Supporting Information

### ***ent*-Rosane diterpenoids from the aerial parts of *Euphorbia milii* with activity against Epstein-Barr virus lytic replication**

Shao-Nan Liu,<sup>a</sup> Jia-Yuan Hu,<sup>b</sup> Shen H. Tan,<sup>a</sup> Qian Wang,<sup>b</sup> Jun Xu,<sup>a</sup> Yan Wang,<sup>c</sup> Yan Yuan,<sup>\*,b,d</sup>  
and Qiong Gu<sup>\*,a</sup>

<sup>a</sup>Research Center for Drug Discovery, School of Pharmaceutical Sciences, Sun Yat-sen University, Guangzhou 510006, People's Republic of China

<sup>b</sup>The Institute of Human Virology, Zhongshan School of Medicine, Sun Yat-sen University, Guangzhou, Guangdong 510080, People's Republic of China

<sup>c</sup>Guanghua School of Stomatology, Sun Yat-sen University, Guangdong Provincial Key Laboratory of Stomatology, Guangzhou 510080, People's Republic of China

<sup>d</sup>Department of Microbiology, School of Dental Medicine, University of Pennsylvania, Philadelphia, Pennsylvania 19104, United States

## List of Contents

| No.                | Content                                                                               | Page |
|--------------------|---------------------------------------------------------------------------------------|------|
| <b>Figure S1.</b>  | The IR Spectra of Compound <b>1</b>                                                   | S6   |
| <b>Figure S2.</b>  | The HRESIMS Spectroscopic Data of Compound <b>1</b>                                   | S7   |
| <b>Figure S3.</b>  | The $^1\text{H}$ NMR Spectrum of Compound <b>1</b> in $\text{CDCl}_3$                 | S8   |
| <b>Figure S4.</b>  | The $^{13}\text{C}$ NMR Spectrum of Compound <b>1</b> in $\text{CDCl}_3$              | S9   |
| <b>Figure S5.</b>  | The $^1\text{H}$ - $^1\text{H}$ COSY Spectrum of Compound <b>1</b> in $\text{CDCl}_3$ | S10  |
| <b>Figure S6.</b>  | The HSQC Spectrum of Compound <b>1</b> in $\text{CDCl}_3$                             | S11  |
| <b>Figure S7.</b>  | The HMBC Spectrum of Compound <b>1</b> in $\text{CDCl}_3$                             | S12  |
| <b>Figure S8.</b>  | The NOESY Spectrum of Compound <b>1</b> in $\text{CDCl}_3$                            | S13  |
| <b>Figure S9.</b>  | The IR Spectra of Compound <b>2</b>                                                   | S14  |
| <b>Figure S10.</b> | The HRESIMS Spectroscopic Data of Compound <b>2</b>                                   | S15  |
| <b>Figure S11.</b> | The $^1\text{H}$ NMR Spectrum of Compound <b>2</b> in $\text{CDCl}_3$                 | S16  |
| <b>Figure S12.</b> | The $^{13}\text{C}$ NMR Spectrum of Compound <b>2</b> in $\text{CDCl}_3$              | S17  |
| <b>Figure S13.</b> | The $^1\text{H}$ - $^1\text{H}$ COSY Spectrum of Compound <b>2</b> in $\text{CDCl}_3$ | S18  |
| <b>Figure S14.</b> | The HSQC Spectrum of Compound <b>2</b> in $\text{CDCl}_3$                             | S19  |
| <b>Figure S15.</b> | The HMBC Spectrum of Compound <b>2</b> in $\text{CDCl}_3$                             | S20  |
| <b>Figure S16.</b> | The NOESY Spectrum of Compound <b>2</b> in $\text{CDCl}_3$                            | S21  |
| <b>Figure S17.</b> | The IR Spectra of Compound <b>3</b>                                                   | S22  |
| <b>Figure S18.</b> | The HRESIMS Spectroscopic Data of Compound <b>3</b>                                   | S23  |
| <b>Figure S19.</b> | The $^1\text{H}$ NMR Spectrum of Compound <b>3</b> in $\text{CDCl}_3$                 | S24  |
| <b>Figure S20.</b> | The $^{13}\text{C}$ NMR Spectrum of Compound <b>3</b> in $\text{CDCl}_3$              | S25  |
| <b>Figure S21.</b> | The $^1\text{H}$ - $^1\text{H}$ COSY Spectrum of Compound <b>3</b> in $\text{CDCl}_3$ | S26  |
| <b>Figure S22.</b> | The HSQC Spectrum of Compound <b>3</b> in $\text{CDCl}_3$                             | S27  |
| <b>Figure S23.</b> | The HMBC Spectrum of Compound <b>3</b> in $\text{CDCl}_3$                             | S28  |
| <b>Figure S24.</b> | The NOESY Spectrum of Compound <b>3</b> in $\text{CDCl}_3$                            | S29  |
| <b>Figure S25.</b> | The IR Spectra of Compound <b>4</b>                                                   | S30  |
| <b>Figure S26.</b> | The HRESIMS Spectroscopic Data of Compound <b>4</b>                                   | S31  |
| <b>Figure S27.</b> | The $^1\text{H}$ NMR Spectrum of Compound <b>4</b> in $\text{CDCl}_3$                 | S32  |
| <b>Figure S28.</b> | The $^{13}\text{C}$ NMR Spectrum of Compound <b>4</b> in $\text{CDCl}_3$              | S33  |

|                    |                                                                                       |     |
|--------------------|---------------------------------------------------------------------------------------|-----|
| <b>Figure S29.</b> | The $^1\text{H}$ - $^1\text{H}$ COSY Spectrum of Compound <b>4</b> in $\text{CDCl}_3$ | S34 |
| <b>Figure S30.</b> | The HSQC Spectrum of Compound <b>4</b> in $\text{CDCl}_3$                             | S35 |
| <b>Figure S31.</b> | The HMBC Spectrum of Compound <b>4</b> in $\text{CDCl}_3$                             | S36 |
| <b>Figure S32.</b> | The NOESY Spectrum of Compound <b>4</b> in $\text{CDCl}_3$                            | S37 |
| <b>Figure S33.</b> | The IR Spectra of Compound <b>5</b>                                                   | S38 |
| <b>Figure S34.</b> | The HRESIMS Spectroscopic Data of Compound <b>5</b>                                   | S39 |
| <b>Figure S35.</b> | The $^1\text{H}$ NMR Spectrum of Compound <b>5</b> in $\text{CDCl}_3$                 | S40 |
| <b>Figure S36.</b> | The $^{13}\text{C}$ NMR Spectrum of Compound <b>5</b> in $\text{CDCl}_3$              | S41 |
| <b>Figure S37.</b> | The $^1\text{H}$ - $^1\text{H}$ COSY Spectrum of Compound <b>5</b> in $\text{CDCl}_3$ | S42 |
| <b>Figure S38.</b> | The HSQC Spectrum of Compound <b>5</b> in $\text{CDCl}_3$                             | S43 |
| <b>Figure S39.</b> | The HMBC Spectrum of Compound <b>5</b> in $\text{CDCl}_3$                             | S44 |
| <b>Figure S40.</b> | The NOESY Spectrum of Compound <b>5</b> in $\text{CDCl}_3$                            | S45 |
| <b>Figure S41.</b> | The IR Spectra of Compound <b>6</b>                                                   | S46 |
| <b>Figure S42.</b> | The HRESIMS Spectroscopic Data of Compound <b>6</b>                                   | S47 |
| <b>Figure S43.</b> | The $^1\text{H}$ NMR Spectrum of Compound <b>6</b> in $\text{CDCl}_3$                 | S48 |
| <b>Figure S44.</b> | The $^{13}\text{C}$ NMR Spectrum of Compound <b>6</b> in $\text{CDCl}_3$              | S49 |
| <b>Figure S45.</b> | The $^1\text{H}$ - $^1\text{H}$ COSY Spectrum of Compound <b>6</b> in $\text{CDCl}_3$ | S50 |
| <b>Figure S46.</b> | The HSQC Spectrum of Compound <b>6</b> in $\text{CDCl}_3$                             | S51 |
| <b>Figure S47.</b> | The HMBC Spectrum of Compound <b>6</b> in $\text{CDCl}_3$                             | S52 |
| <b>Figure S48.</b> | The NOESY Spectrum of Compound <b>6</b> in $\text{CDCl}_3$                            | S53 |
| <b>Figure S49.</b> | The IR Spectra of Compound <b>7</b>                                                   | S54 |
| <b>Figure S50.</b> | The HRESIMS Spectroscopic Data of Compound <b>7</b>                                   | S55 |
| <b>Figure S51.</b> | The $^1\text{H}$ NMR Spectrum of Compound <b>7</b> in $\text{CDCl}_3$                 | S56 |
| <b>Figure S52.</b> | The $^{13}\text{C}$ NMR Spectrum of Compound <b>7</b> in $\text{CDCl}_3$              | S57 |
| <b>Figure S53.</b> | The $^1\text{H}$ - $^1\text{H}$ COSY Spectrum of Compound <b>7</b> in $\text{CDCl}_3$ | S58 |
| <b>Figure S54.</b> | The HSQC Spectrum of Compound <b>7</b> in $\text{CDCl}_3$                             | S59 |
| <b>Figure S55.</b> | The HMBC Spectrum of Compound <b>7</b> in $\text{CDCl}_3$                             | S60 |
| <b>Figure S56.</b> | The NOESY Spectrum of Compound <b>7</b> in $\text{CDCl}_3$                            | S61 |
| <b>Figure S57.</b> | The IR Spectra of Compound <b>8</b>                                                   | S62 |
| <b>Figure S58.</b> | The HRESIMS Spectroscopic Data of Compound <b>8</b>                                   | S63 |

|                    |                                                                                        |     |
|--------------------|----------------------------------------------------------------------------------------|-----|
| <b>Figure S59.</b> | The $^1\text{H}$ NMR Spectrum of Compound <b>8</b> in $\text{CDCl}_3$                  | S64 |
| <b>Figure S60.</b> | The $^{13}\text{C}$ NMR Spectrum of Compound <b>8</b> in $\text{CDCl}_3$               | S65 |
| <b>Figure S61.</b> | The $^1\text{H}$ - $^1\text{H}$ COSY Spectrum of Compound <b>8</b> in $\text{CDCl}_3$  | S66 |
| <b>Figure S62.</b> | The HSQC Spectrum of Compound <b>8</b> in $\text{CDCl}_3$                              | S67 |
| <b>Figure S63.</b> | The HMBC Spectrum of Compound <b>8</b> in $\text{CDCl}_3$                              | S68 |
| <b>Figure S64.</b> | The NOESY Spectrum of Compound <b>8</b> in $\text{CDCl}_3$                             | S69 |
| <b>Figure S65.</b> | The IR Spectra of Compound <b>9</b>                                                    | S70 |
| <b>Figure S66.</b> | The HRESIMS Spectroscopic Data of Compound <b>9</b>                                    | S71 |
| <b>Figure S67.</b> | The $^1\text{H}$ NMR Spectrum of Compound <b>9</b> in $\text{CDCl}_3$                  | S72 |
| <b>Figure S68.</b> | The $^{13}\text{C}$ NMR Spectrum of Compound <b>9</b> in $\text{CDCl}_3$               | S73 |
| <b>Figure S69.</b> | The $^1\text{H}$ - $^1\text{H}$ COSY Spectrum of Compound <b>9</b> in $\text{CDCl}_3$  | S74 |
| <b>Figure S70.</b> | The HSQC Spectrum of Compound <b>9</b> in $\text{CDCl}_3$                              | S75 |
| <b>Figure S71.</b> | The HMBC Spectrum of Compound <b>9</b> in $\text{CDCl}_3$                              | S76 |
| <b>Figure S72.</b> | The NOESY Spectrum of Compound <b>9</b> in $\text{CDCl}_3$                             | S77 |
| <b>Figure S73.</b> | The IR Spectra of Compound <b>10</b>                                                   | S78 |
| <b>Figure S74.</b> | The HRESIMS Spectroscopic Data of Compound <b>10</b>                                   | S79 |
| <b>Figure S75.</b> | The $^1\text{H}$ NMR Spectrum of Compound <b>10</b> in $\text{CDCl}_3$                 | S80 |
| <b>Figure S76.</b> | The $^{13}\text{C}$ NMR Spectrum of Compound <b>10</b> in $\text{CDCl}_3$              | S81 |
| <b>Figure S77.</b> | The $^1\text{H}$ - $^1\text{H}$ COSY Spectrum of Compound <b>10</b> in $\text{CDCl}_3$ | S82 |
| <b>Figure S78.</b> | The HSQC Spectrum of Compound <b>10</b> in $\text{CDCl}_3$                             | S83 |
| <b>Figure S79.</b> | The HMBC Spectrum of Compound <b>10</b> in $\text{CDCl}_3$                             | S84 |
| <b>Figure S80.</b> | The NOESY Spectrum of Compound <b>10</b> in $\text{CDCl}_3$                            | S85 |
| <b>Figure S81.</b> | The IR Spectra of Compound <b>11</b>                                                   | S86 |
| <b>Figure S82.</b> | The HRESIMS Spectroscopic Data of Compound <b>11</b>                                   | S87 |
| <b>Figure S83.</b> | The $^1\text{H}$ NMR Spectrum of Compound <b>11</b> in $\text{CDCl}_3$                 | S88 |
| <b>Figure S84.</b> | The $^{13}\text{C}$ NMR Spectrum of Compound <b>11</b> in $\text{CDCl}_3$              | S89 |
| <b>Figure S85.</b> | The $^1\text{H}$ - $^1\text{H}$ COSY Spectrum of Compound <b>11</b> in $\text{CDCl}_3$ | S90 |
| <b>Figure S86.</b> | The HSQC Spectrum of Compound <b>11</b> in $\text{CDCl}_3$                             | S91 |
| <b>Figure S87.</b> | The HMBC Spectrum of Compound <b>11</b> in $\text{CDCl}_3$                             | S92 |
| <b>Figure S88.</b> | The NOESY Spectrum of Compound <b>11</b> in $\text{CDCl}_3$                            | S93 |



|                     |                                                                                        |      |
|---------------------|----------------------------------------------------------------------------------------|------|
| <b>Figure S89.</b>  | The IR Spectra of Compound <b>12</b>                                                   | S94  |
| <b>Figure S90.</b>  | The HRESIMS Spectroscopic Data of Compound <b>12</b>                                   | S95  |
| <b>Figure S91.</b>  | The $^1\text{H}$ NMR Spectrum of Compound <b>12</b> in $\text{CDCl}_3$                 | S96  |
| <b>Figure S92.</b>  | The $^{13}\text{C}$ NMR Spectrum of Compound <b>12</b> in $\text{CDCl}_3$              | S97  |
| <b>Figure S93.</b>  | The $^1\text{H}$ - $^1\text{H}$ COSY Spectrum of Compound <b>12</b> in $\text{CDCl}_3$ | S98  |
| <b>Figure S94.</b>  | The HSQC Spectrum of Compound <b>12</b> in $\text{CDCl}_3$                             | S99  |
| <b>Figure S95.</b>  | The HMBC Spectrum of Compound <b>12</b> in $\text{CDCl}_3$                             | S100 |
| <b>Figure S96.</b>  | The NOESY Spectrum of Compound <b>12</b> in $\text{CDCl}_3$                            | S101 |
| <b>Figure S97.</b>  | The IR Spectra of Compound <b>13</b>                                                   | S102 |
| <b>Figure S98.</b>  | The HREIMS Spectroscopic Data of Compound <b>13</b>                                    | S103 |
| <b>Figure S99.</b>  | The $^1\text{H}$ NMR Spectrum of Compound <b>13</b> in $\text{CDCl}_3$                 | S104 |
| <b>Figure S100.</b> | The $^{13}\text{C}$ NMR Spectrum of Compound <b>13</b> in $\text{CDCl}_3$              | S105 |
| <b>Figure S101.</b> | The $^1\text{H}$ - $^1\text{H}$ COSY Spectrum of Compound <b>13</b> in $\text{CDCl}_3$ | S106 |
| <b>Figure S102.</b> | The HSQC Spectrum of Compound <b>13</b> in $\text{CDCl}_3$                             | S107 |
| <b>Figure S103.</b> | The HMBC Spectrum of Compound <b>13</b> in $\text{CDCl}_3$                             | S108 |
| <b>Figure S104.</b> | The NOESY Spectrum of Compound <b>13</b> in $\text{CDCl}_3$                            | S109 |
| <b>Figure S105.</b> | The ECD Spectrum of Compounds <b>5</b> , <b>7-9</b> in MeOH                            | S110 |
| <b>Figure S106.</b> | The ECD Spectrum of Compounds <b>12</b> and <b>13</b> in MeOH                          | S111 |
| <b>Figure S107.</b> | The Optimized 3D Structures of Compounds <b>12</b> and <b>13</b>                       | S111 |

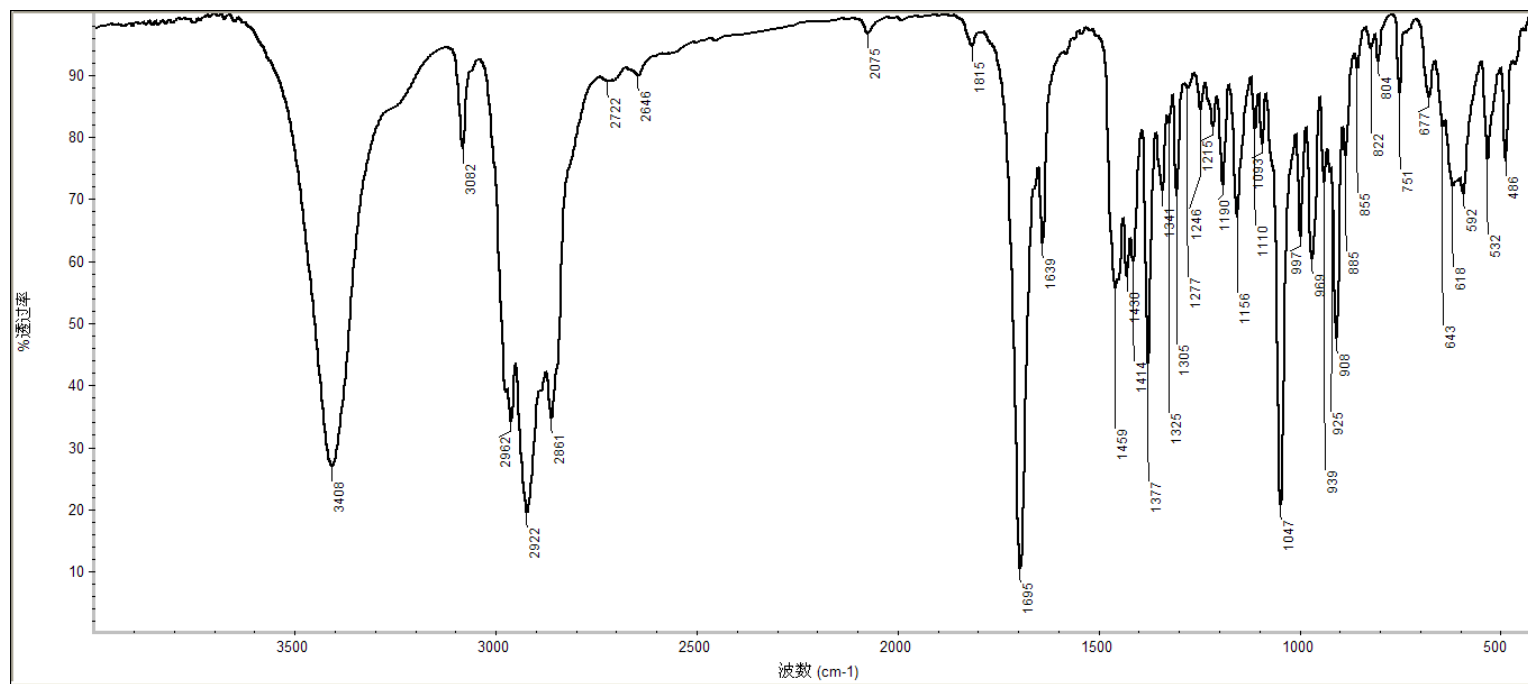

**Figure S1.** The IR Spectra of Compound **1**

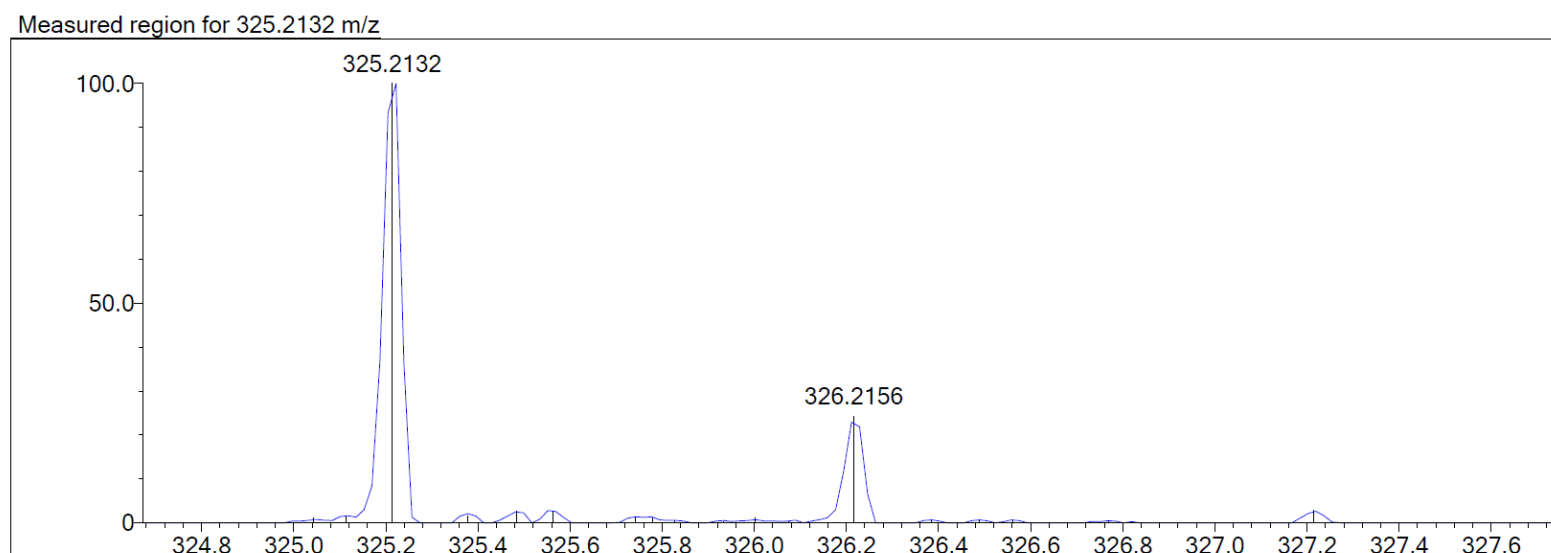


---

SPECTRUM -

simulation :

---

| m/z      | Theo. Mass | Delta (ppm) | RDB equiv. | Composition                                       |
|----------|------------|-------------|------------|---------------------------------------------------|
| 325.2132 | 325.2138   | -1.84       | 6.0        | C <sub>20</sub> H <sub>30</sub> O <sub>2</sub> Na |

---

**Figure S2.** The HRESIMS Spectroscopic Data of Compound **1**

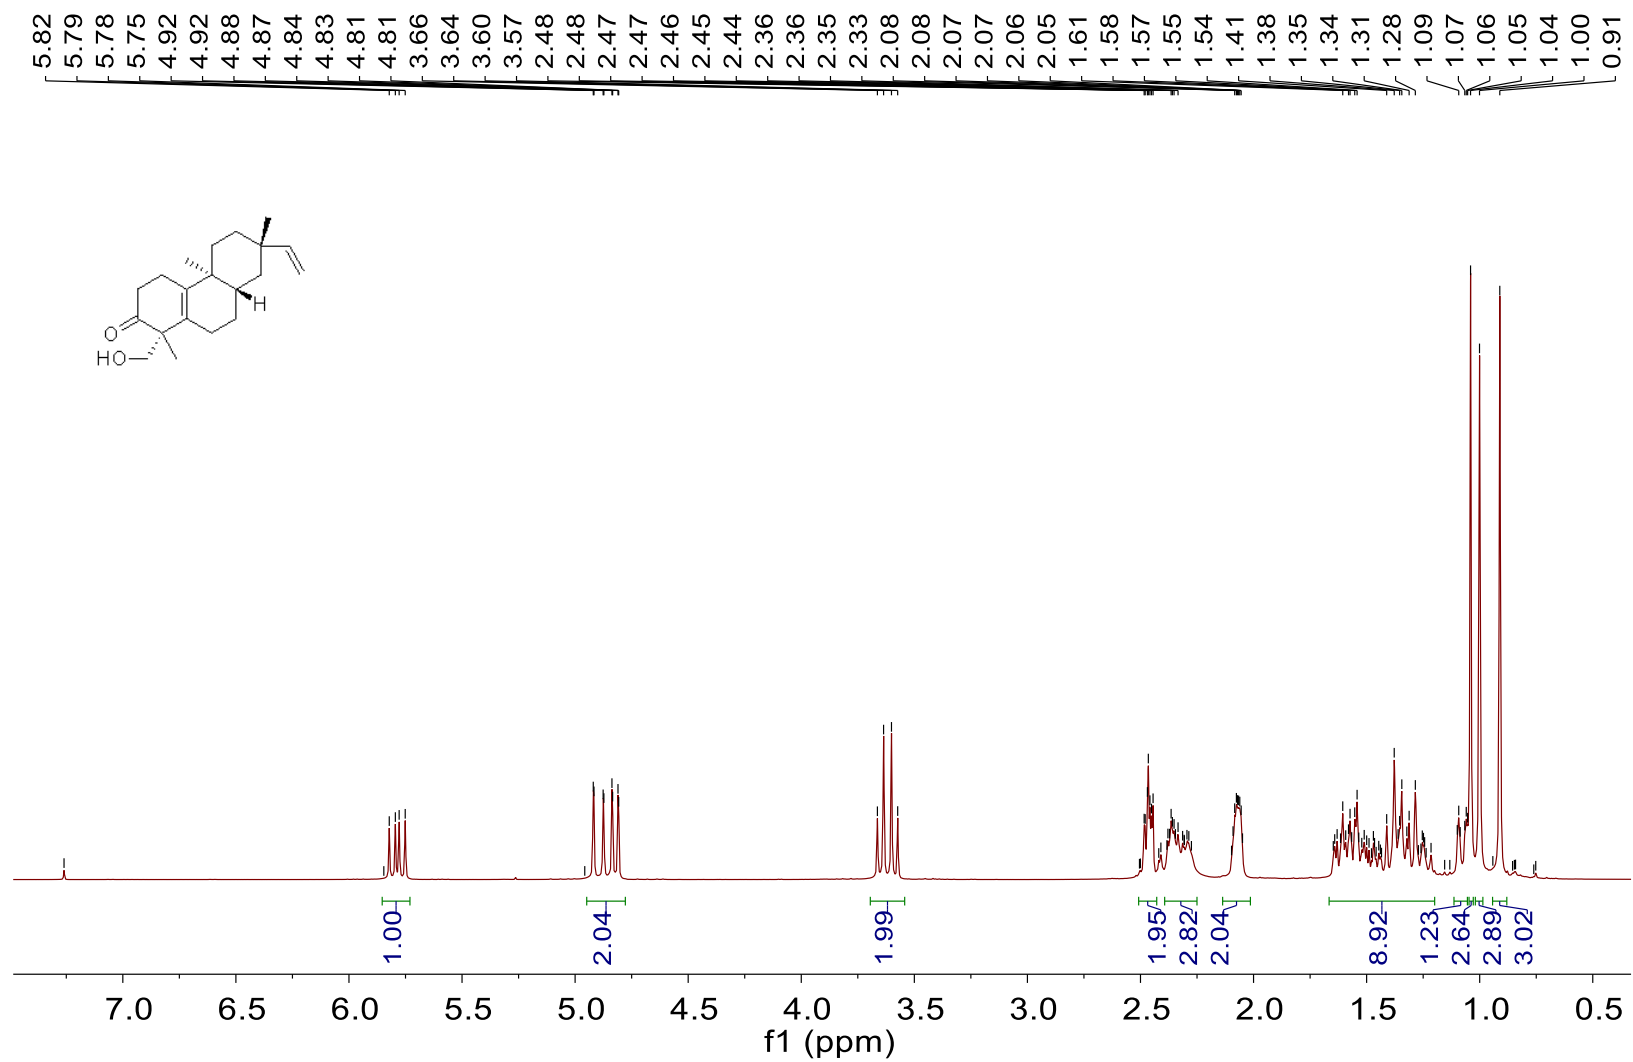

**Figure S3.** The <sup>1</sup>H NMR Spectrum of Compound **1** in CDCl<sub>3</sub>

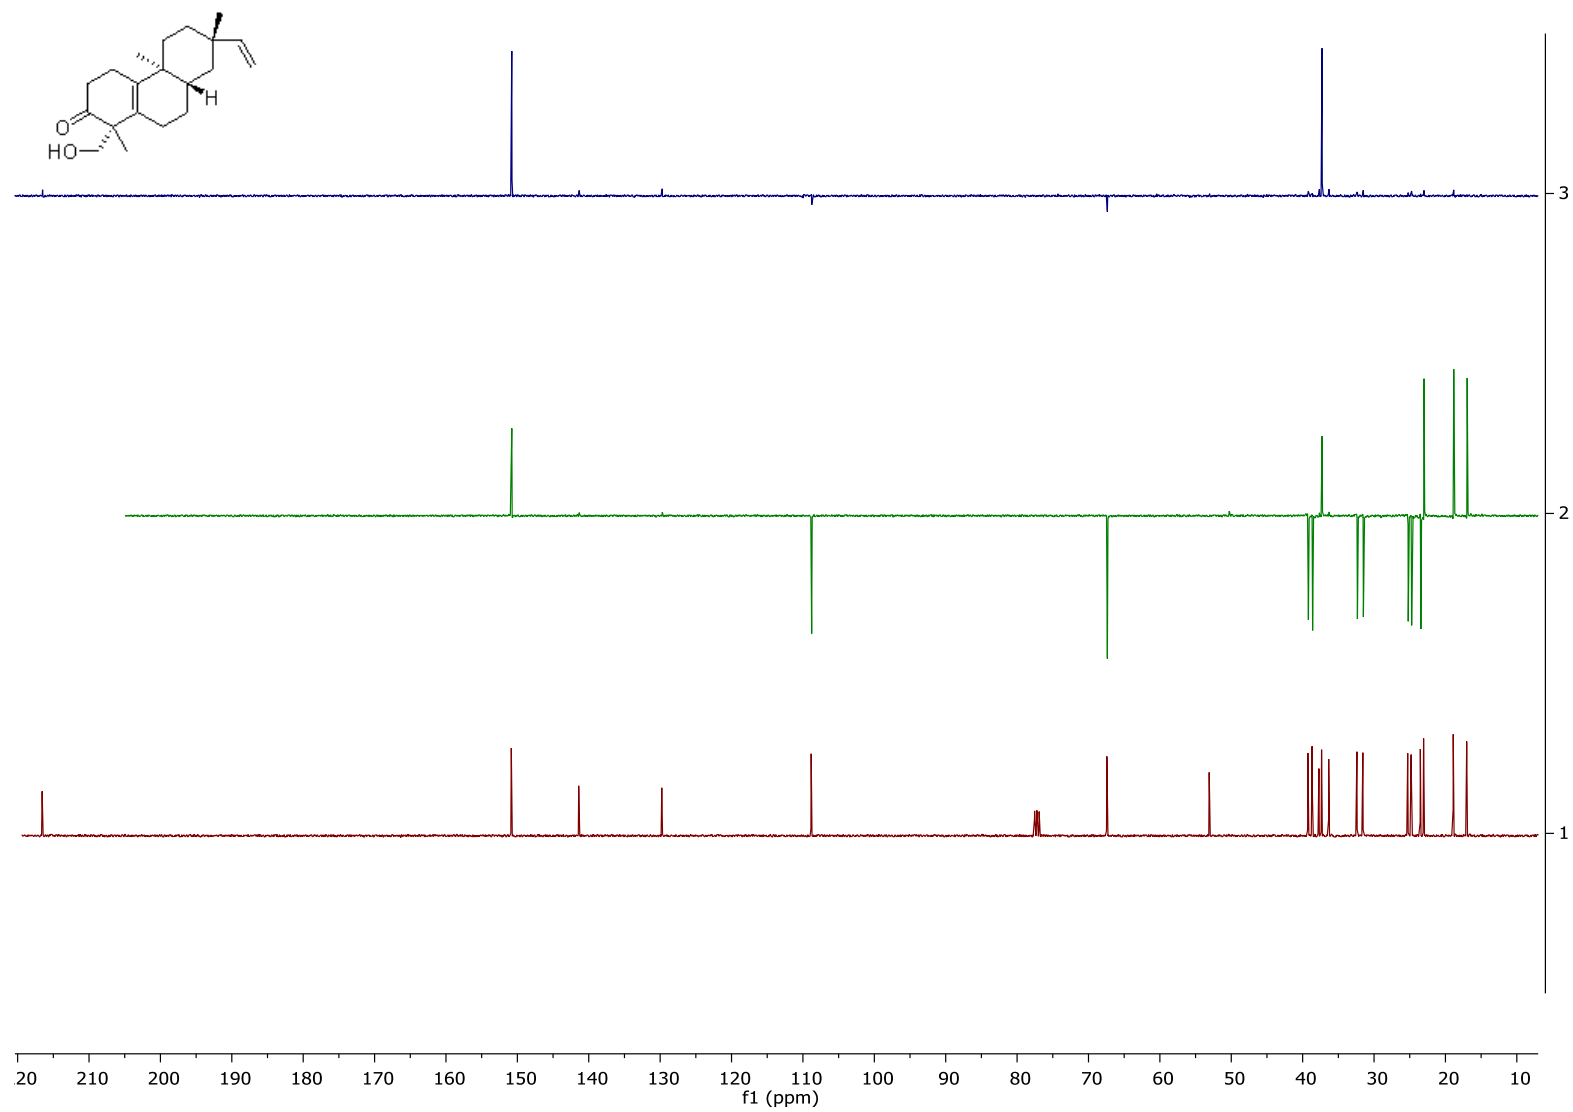

**Figure S4.** The  $^{13}\text{C}$  NMR Spectrum of Compound **1** in  $\text{CDCl}_3$

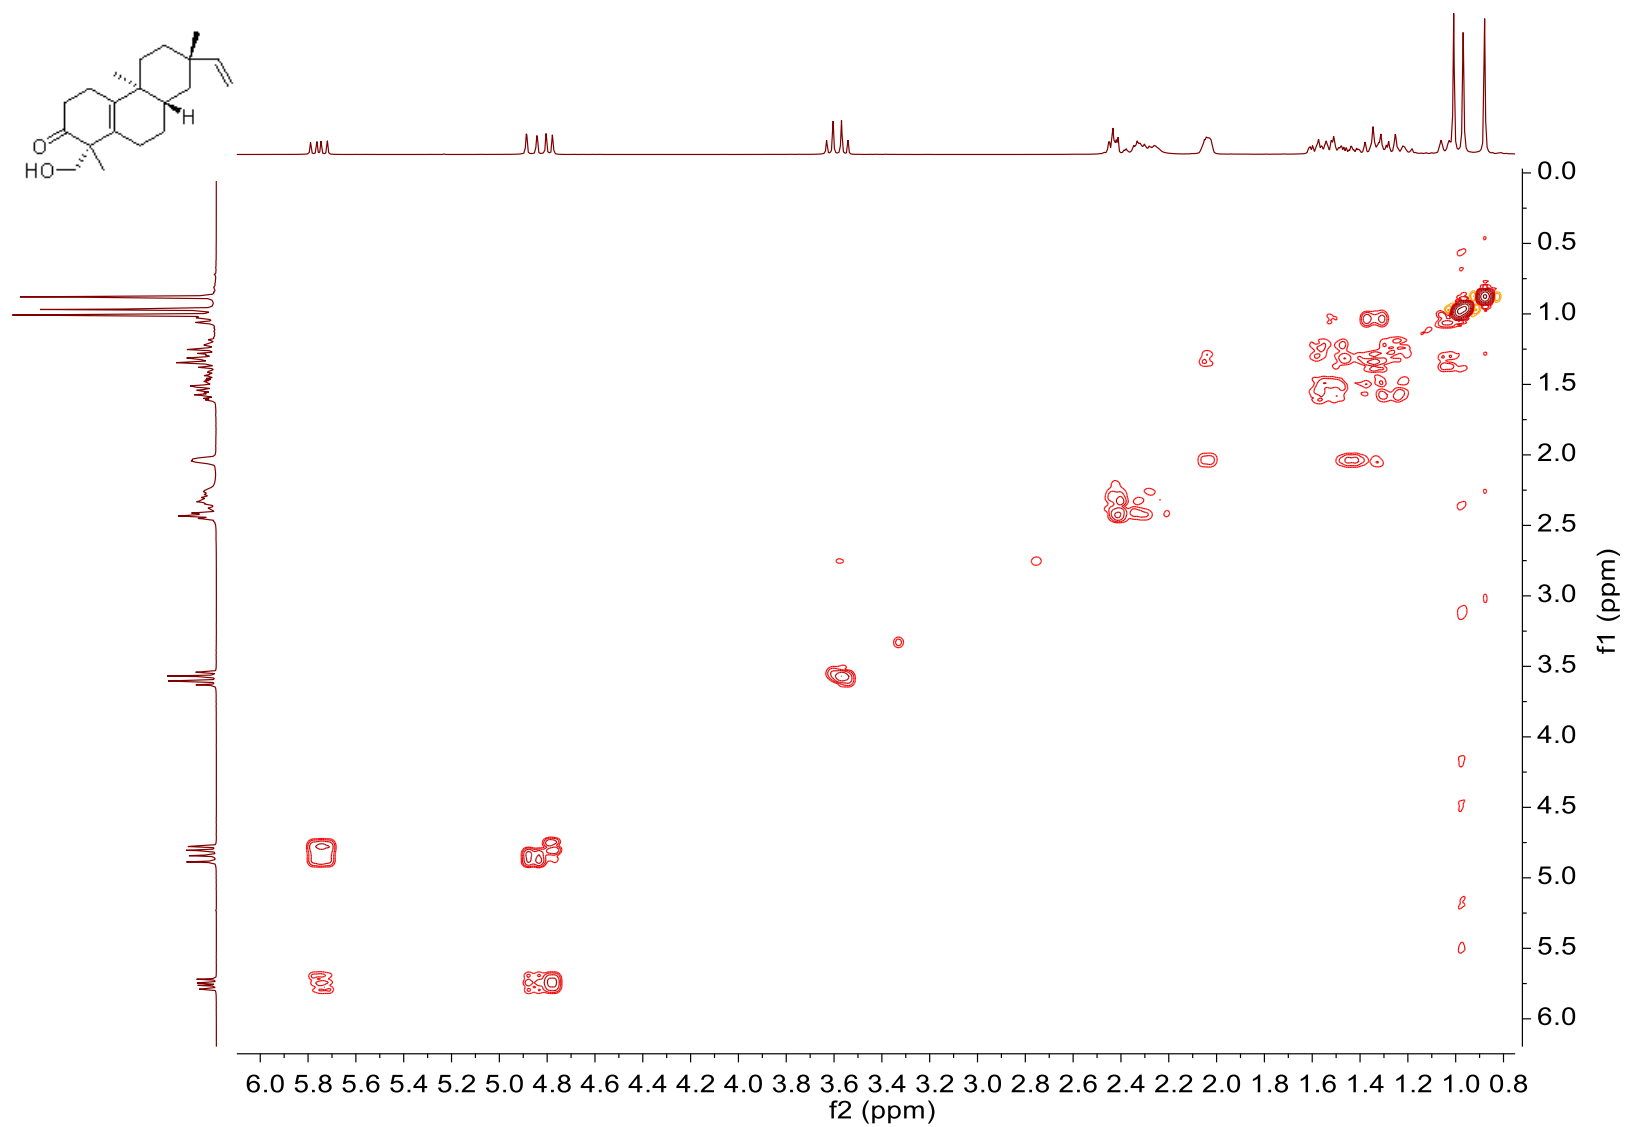

**Figure S5.** The  $^1\text{H}$ - $^1\text{H}$  COSY Spectrum of Compound **1** in  $\text{CDCl}_3$

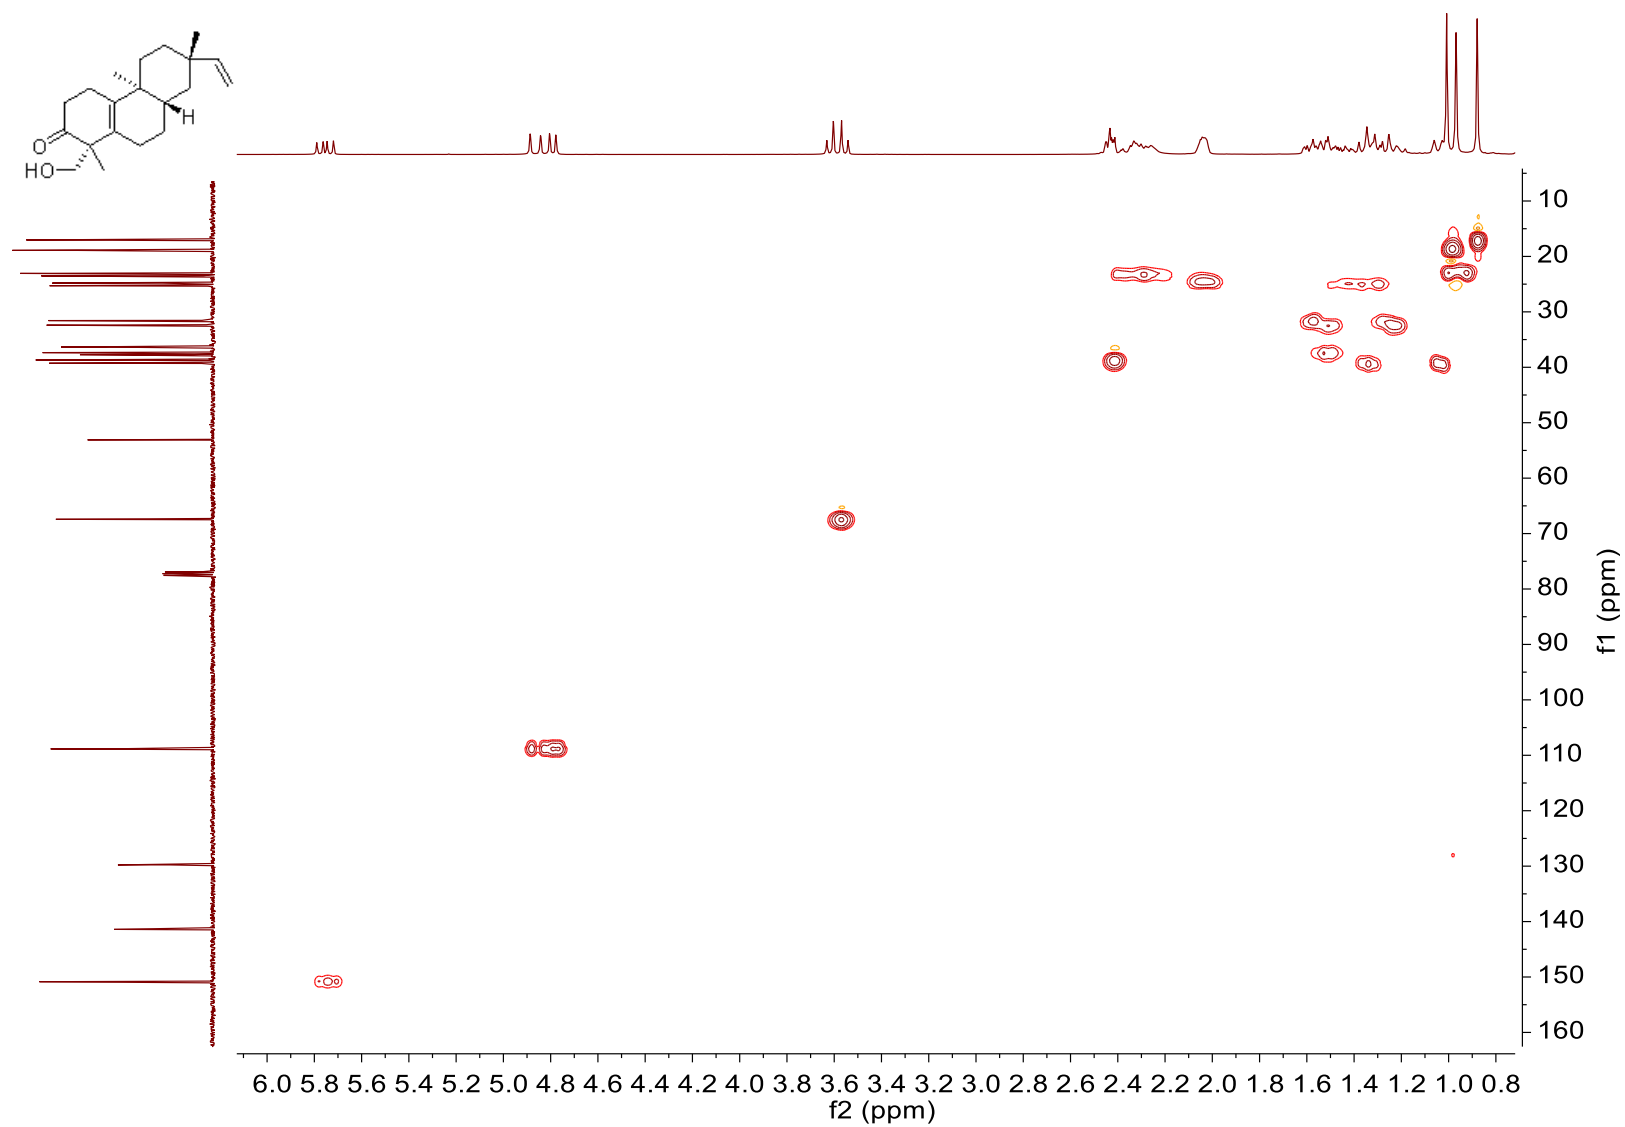

**Figure S6.** The HSQC Spectrum of Compound **1** in CDCl<sub>3</sub>

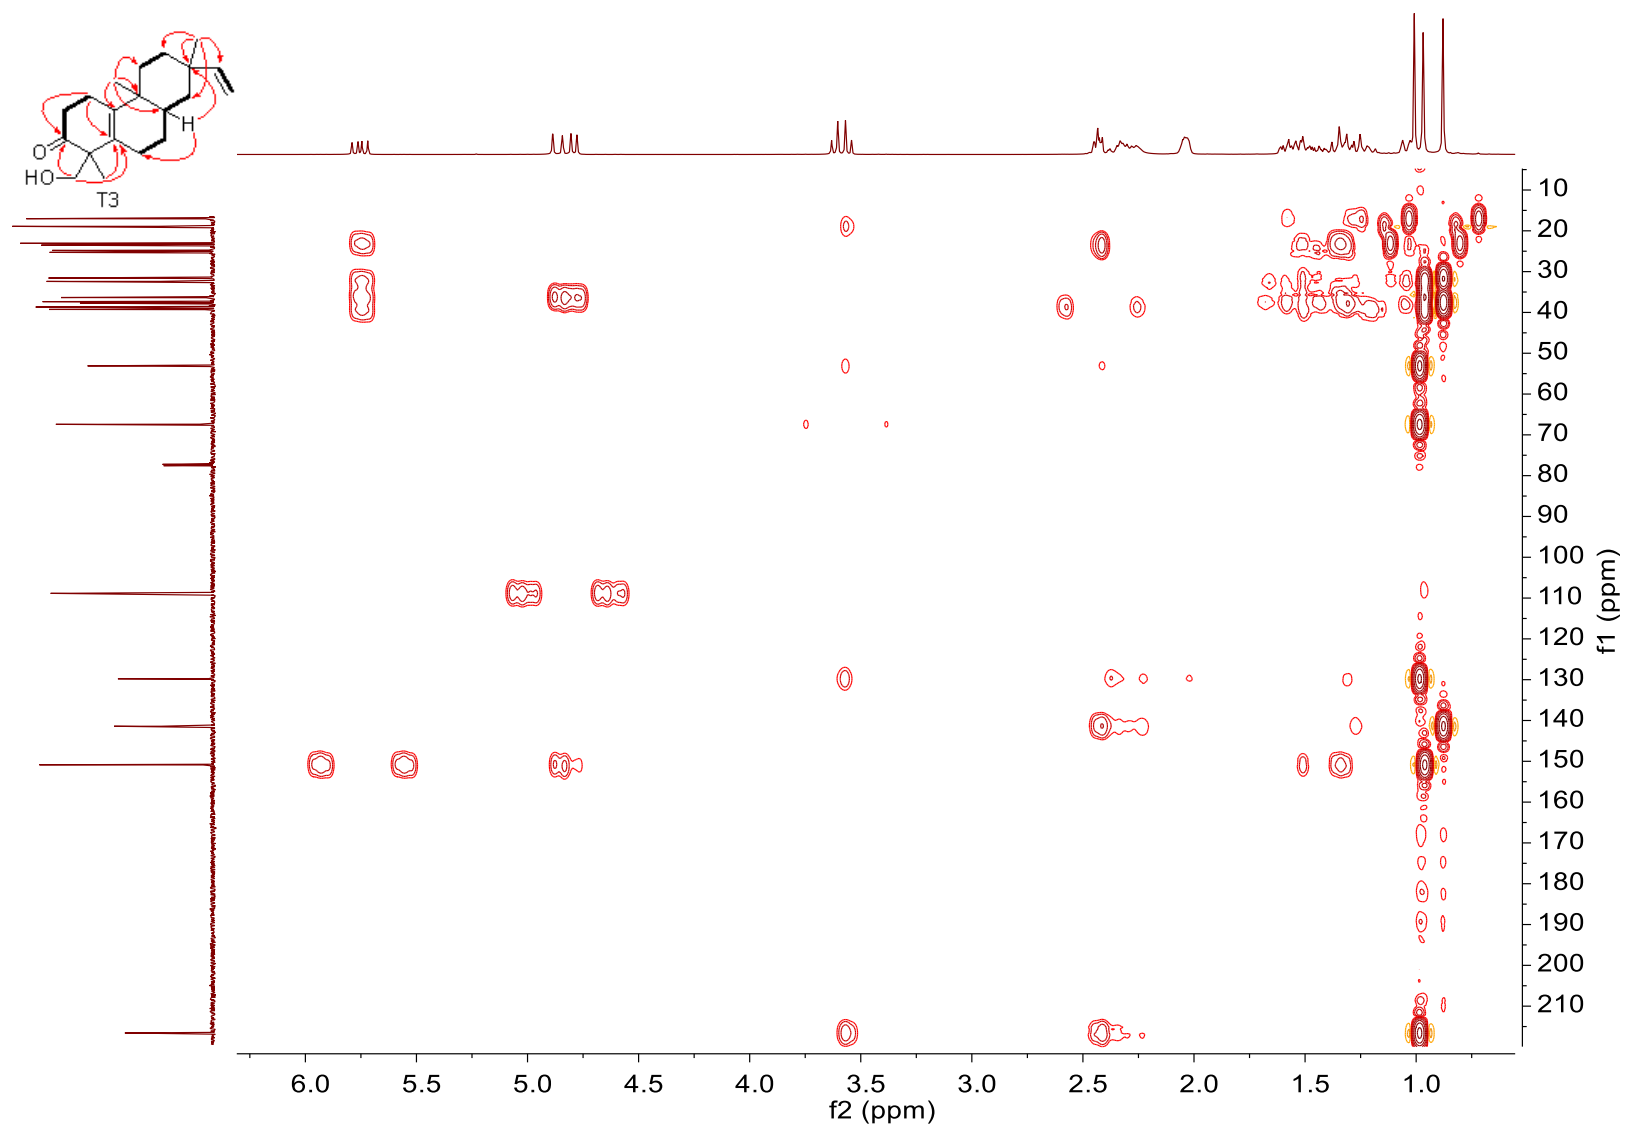

**Figure S7.** The HMBC Spectrum of Compound **1** in  $\text{CDCl}_3$



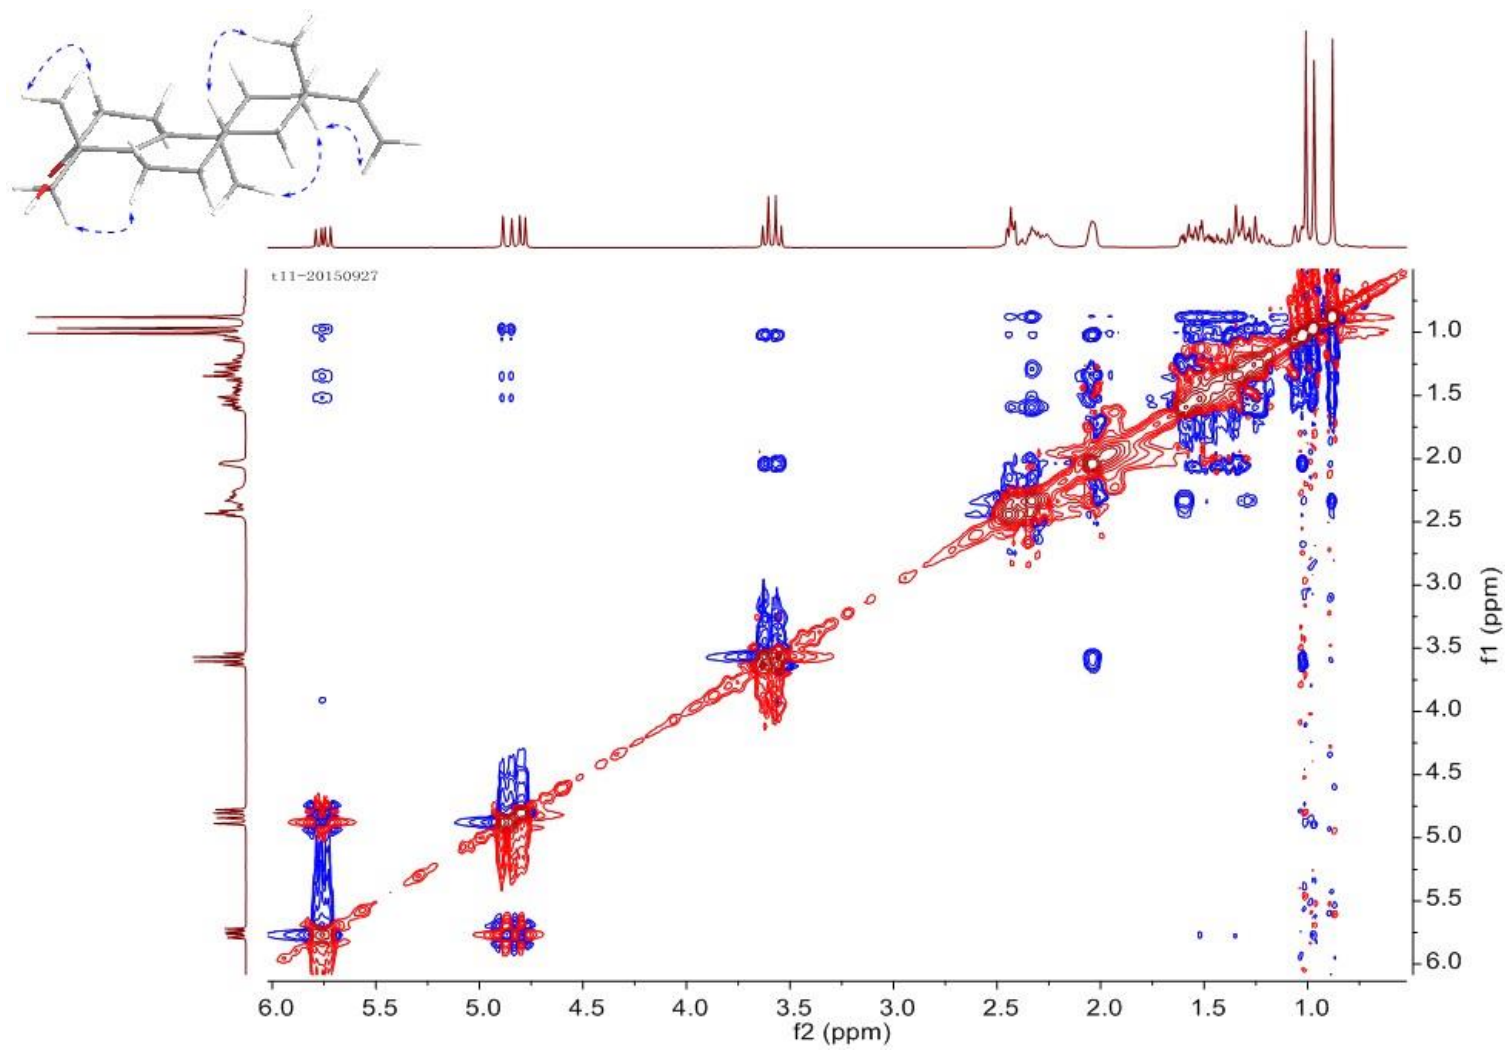

**Figure S8.** The NOESY Spectrum of Compound **1** in CDCl<sub>3</sub>

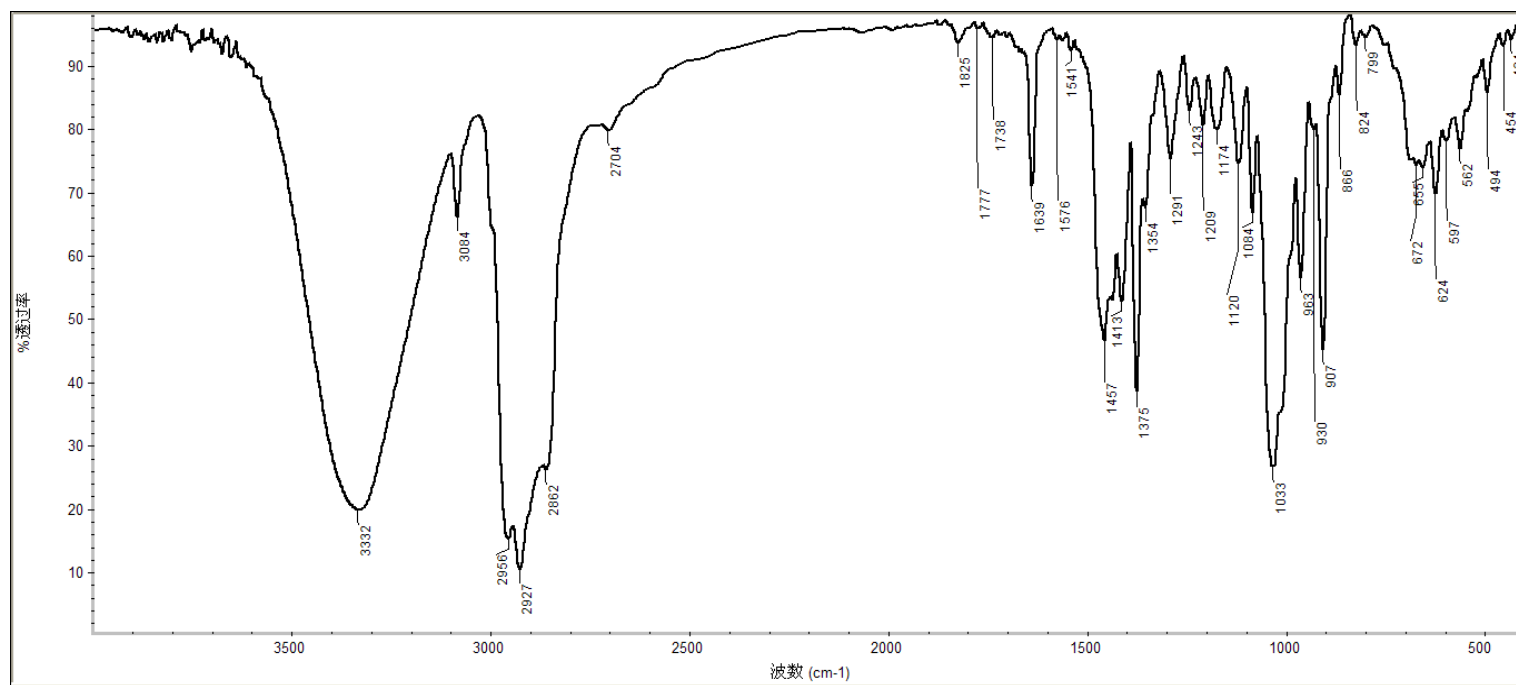

**Figure S9.** The IR Spectra of Compound 2

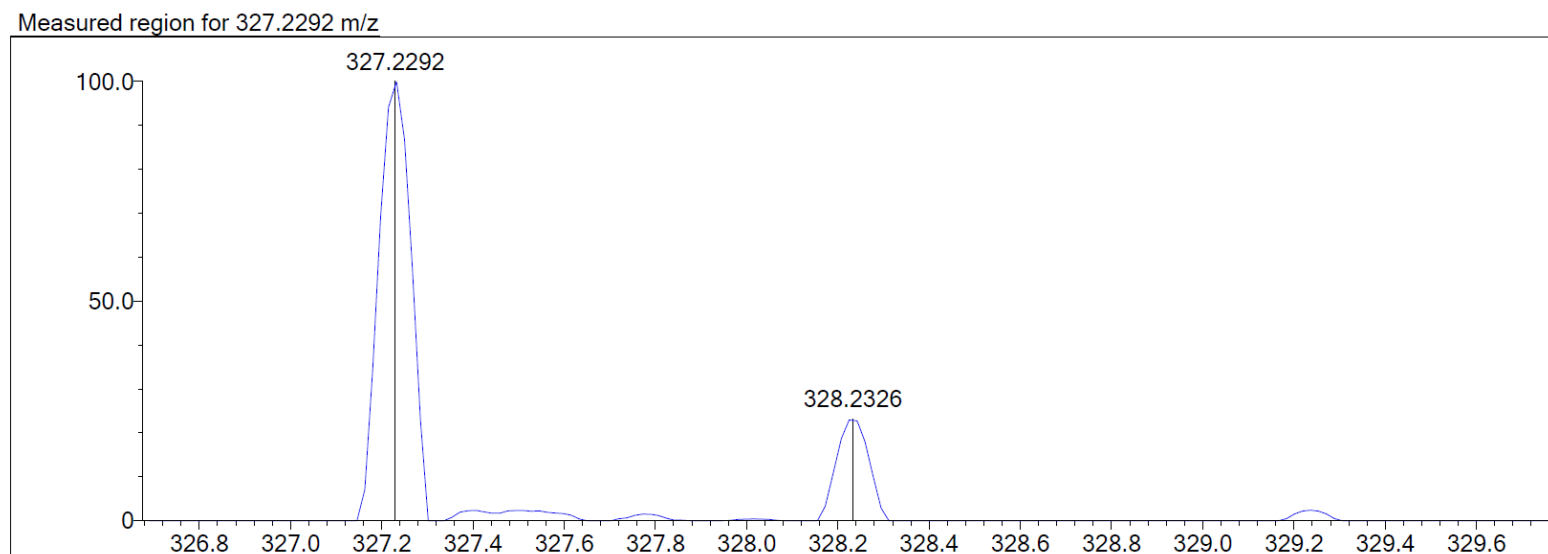


---

SPECTRUM -

simulation :

---

| m/z      | Theo. Mass | Delta (ppm) | RDB equiv. | Composition                                       |
|----------|------------|-------------|------------|---------------------------------------------------|
| 327.2292 | 327.2295   | -0.92       | 5.0        | C <sub>20</sub> H <sub>32</sub> O <sub>2</sub> Na |

---

**Figure S10.** The HRESIMS Spectroscopic Data of Compound **2**

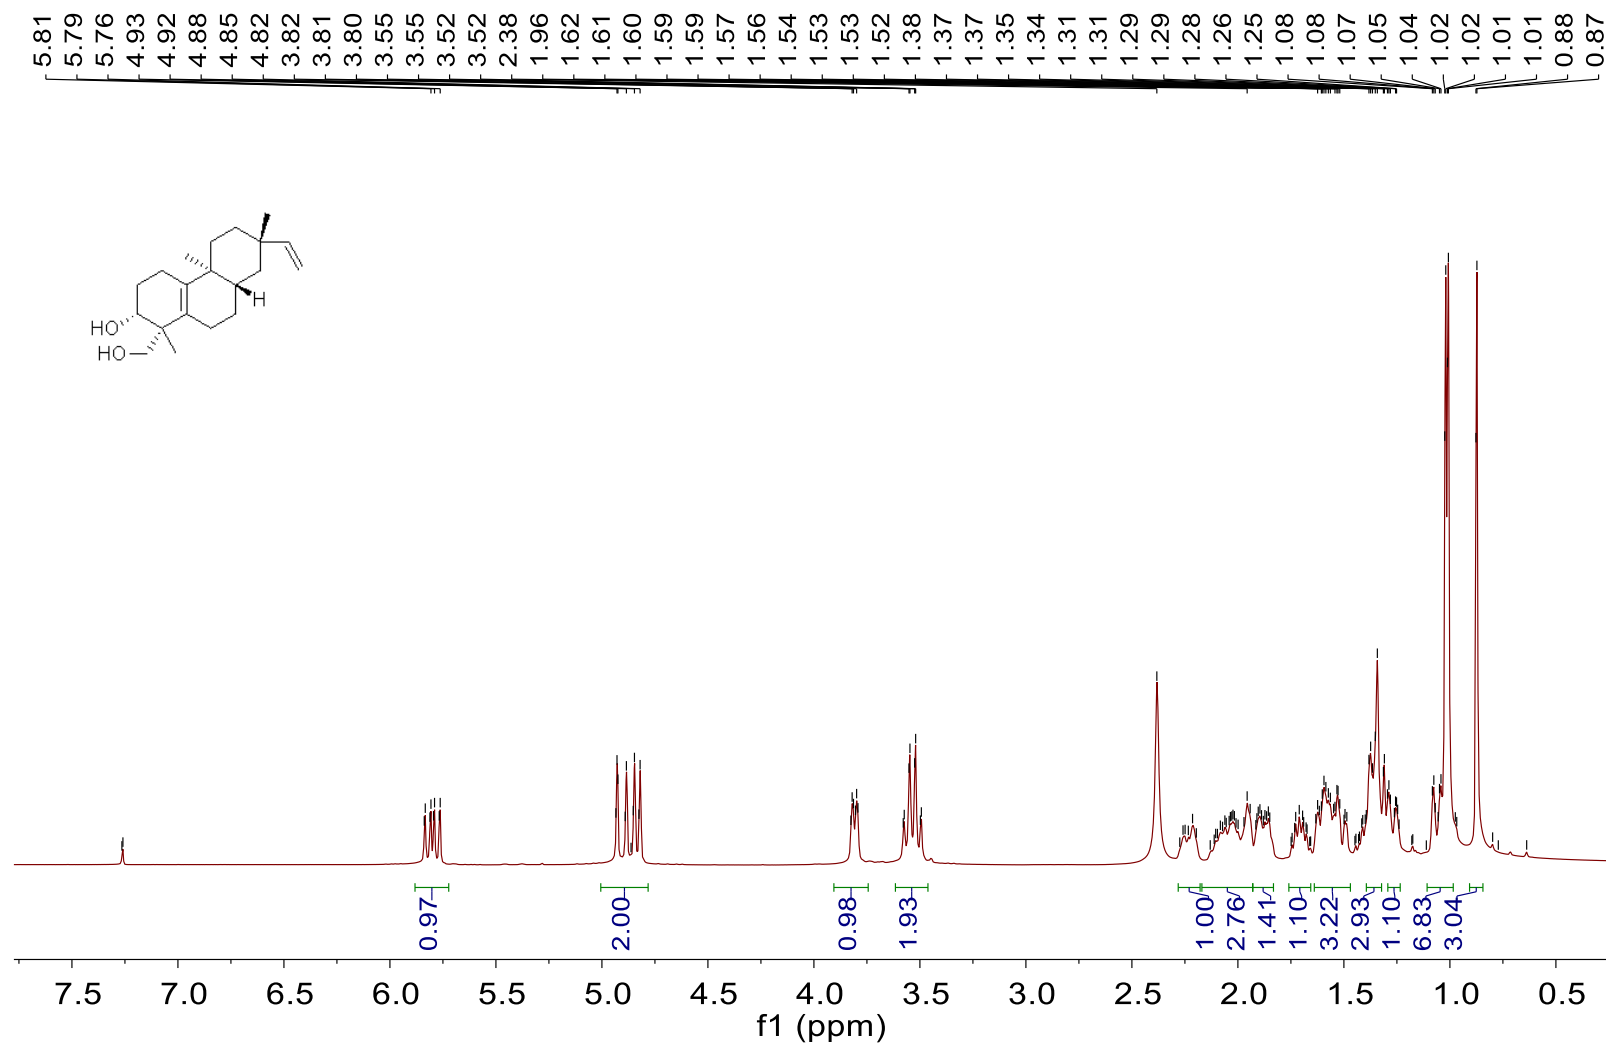

**Figure S11.** The <sup>1</sup>H NMR Spectrum of Compound **2** in CDCl<sub>3</sub>

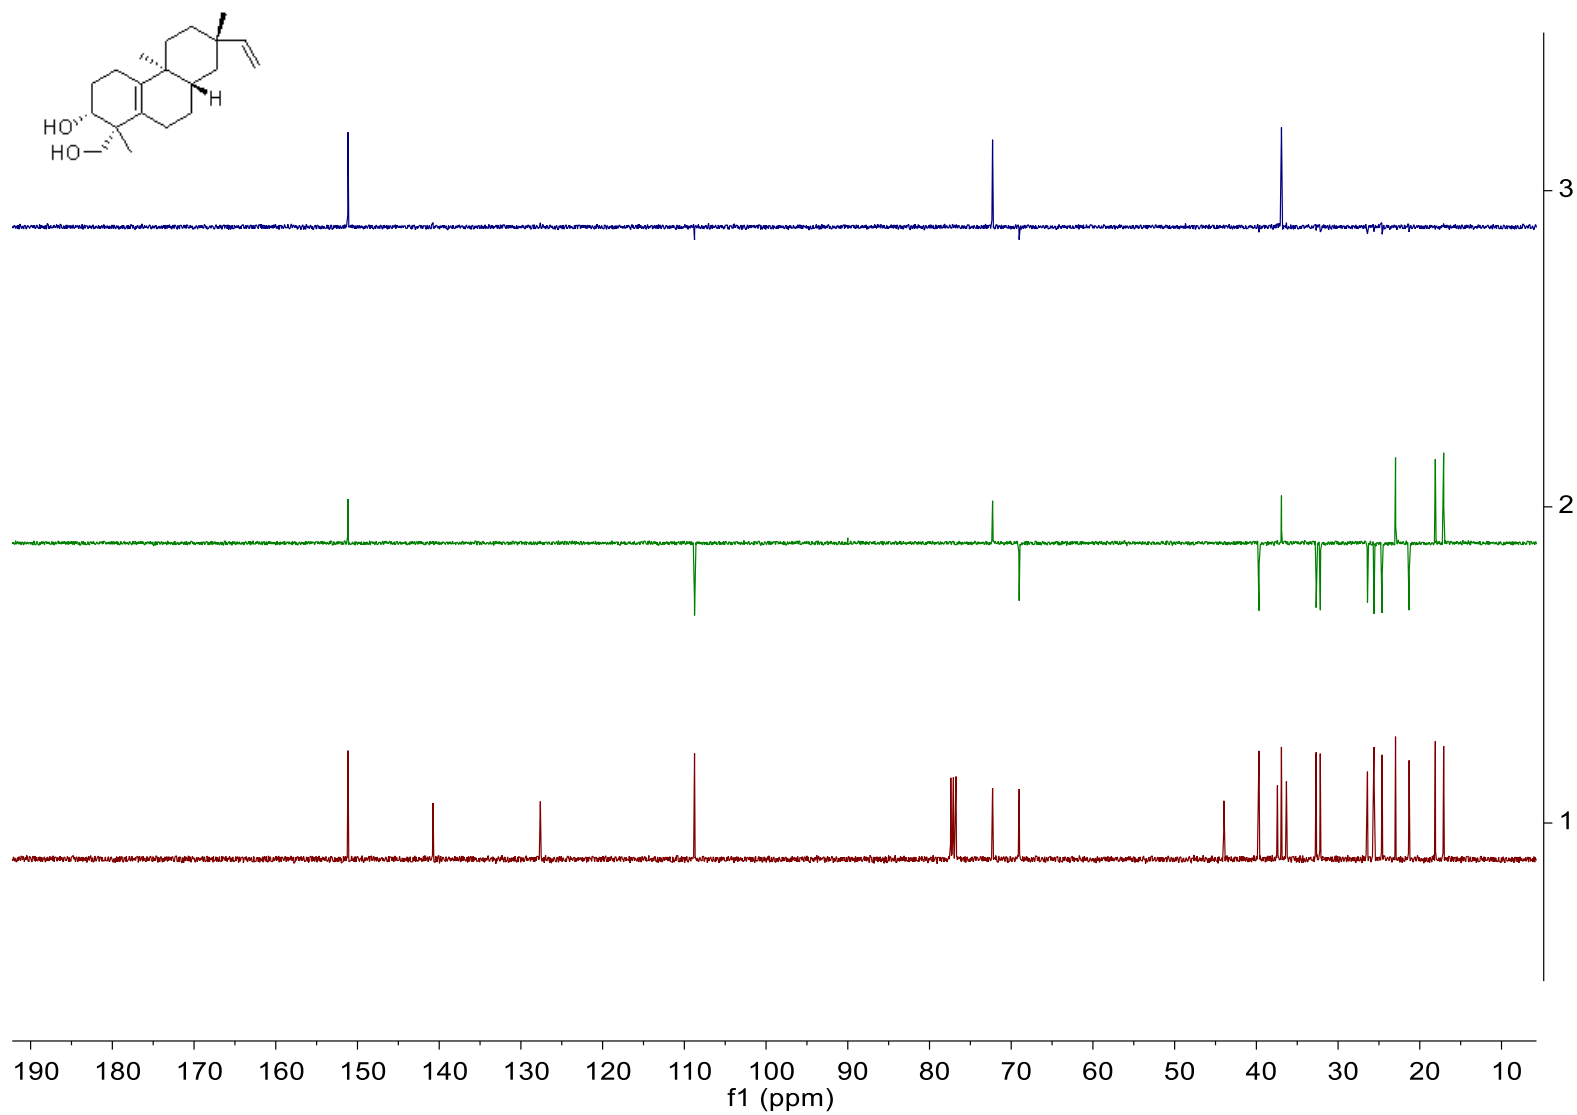

**Figure S12.** The  $^{13}\text{C}$  NMR Spectrum of Compound **2** in  $\text{CDCl}_3$

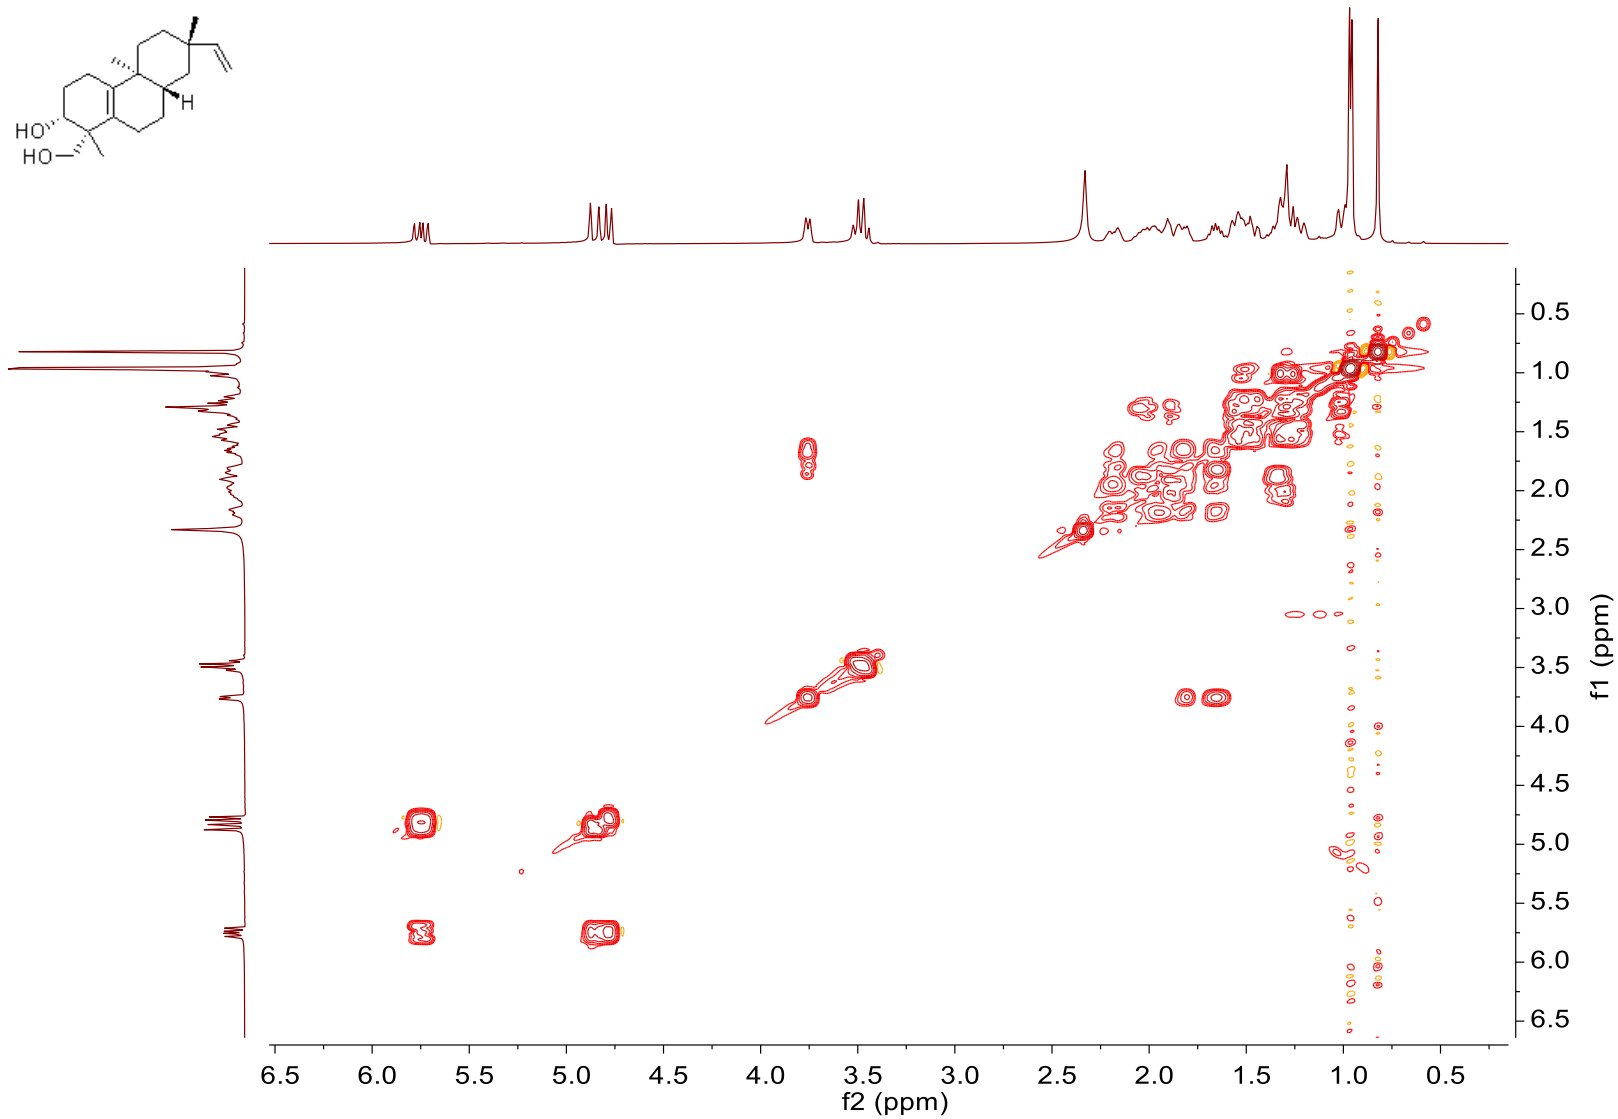

**Figure S13.** The  $^1\text{H}$ - $^1\text{H}$  COSY Spectrum of Compound **2** in  $\text{CDCl}_3$

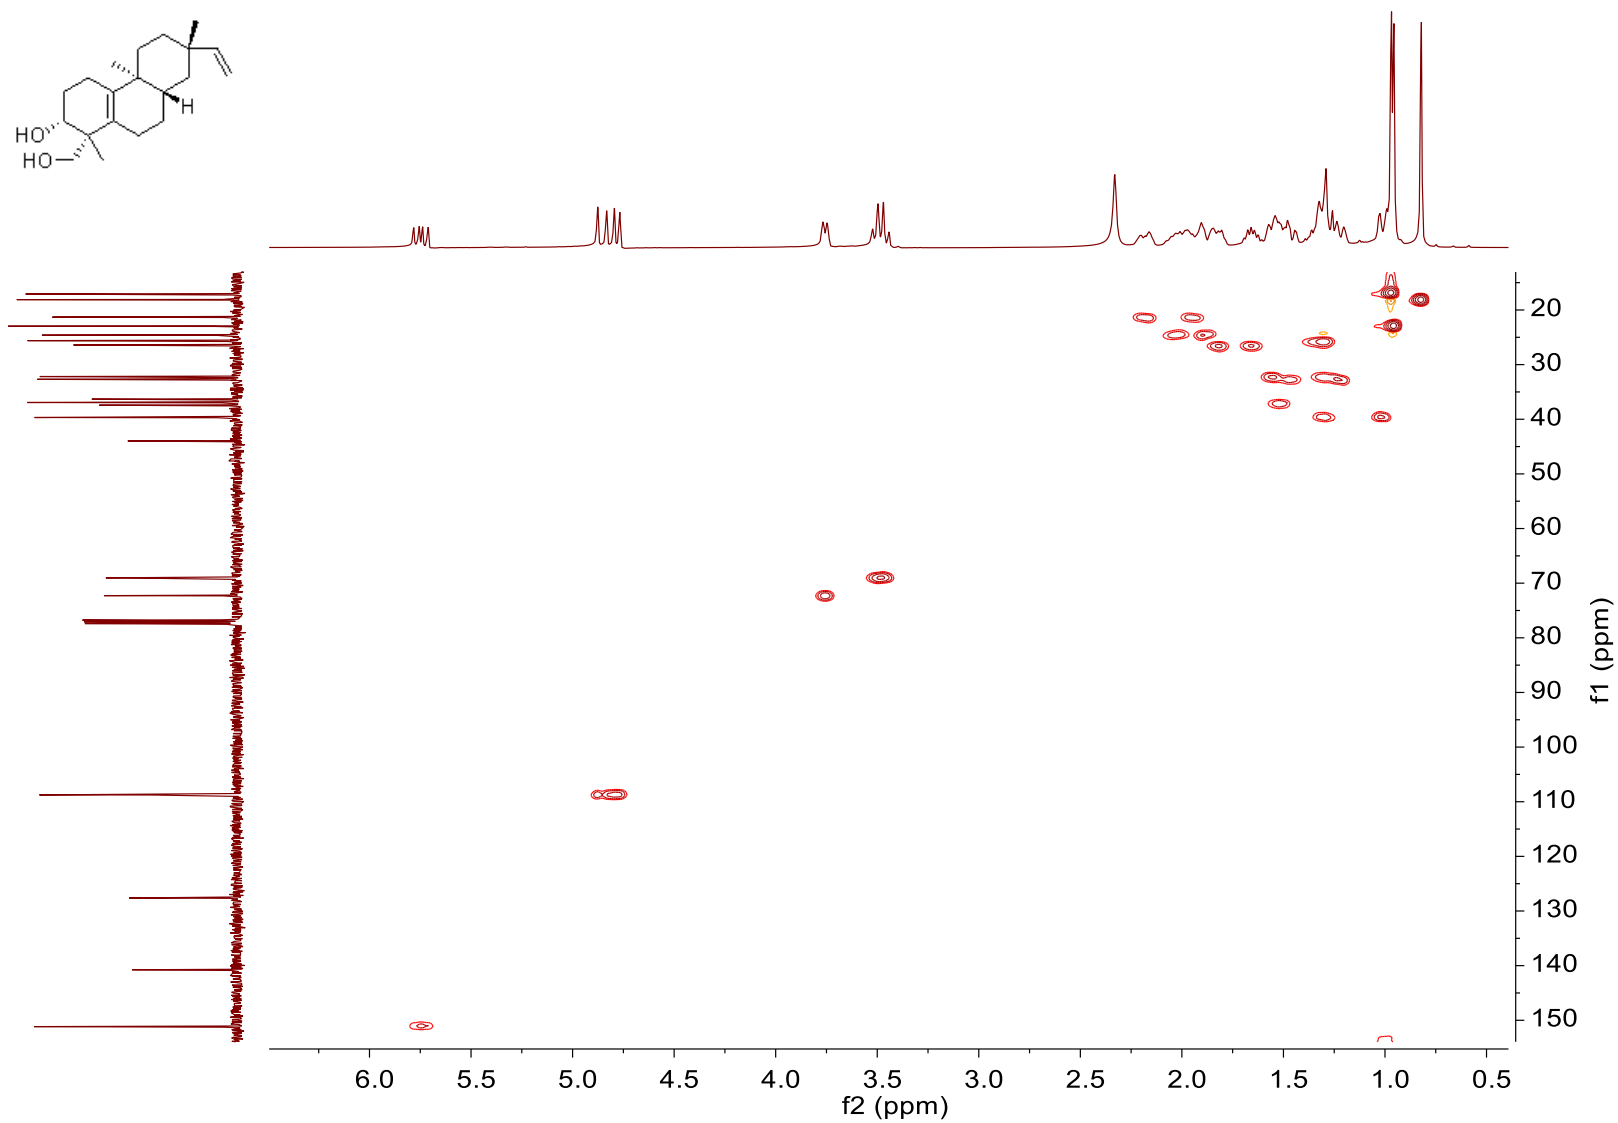

**Figure S14.** The HSQC Spectrum of Compound **2** in CDCl<sub>3</sub>

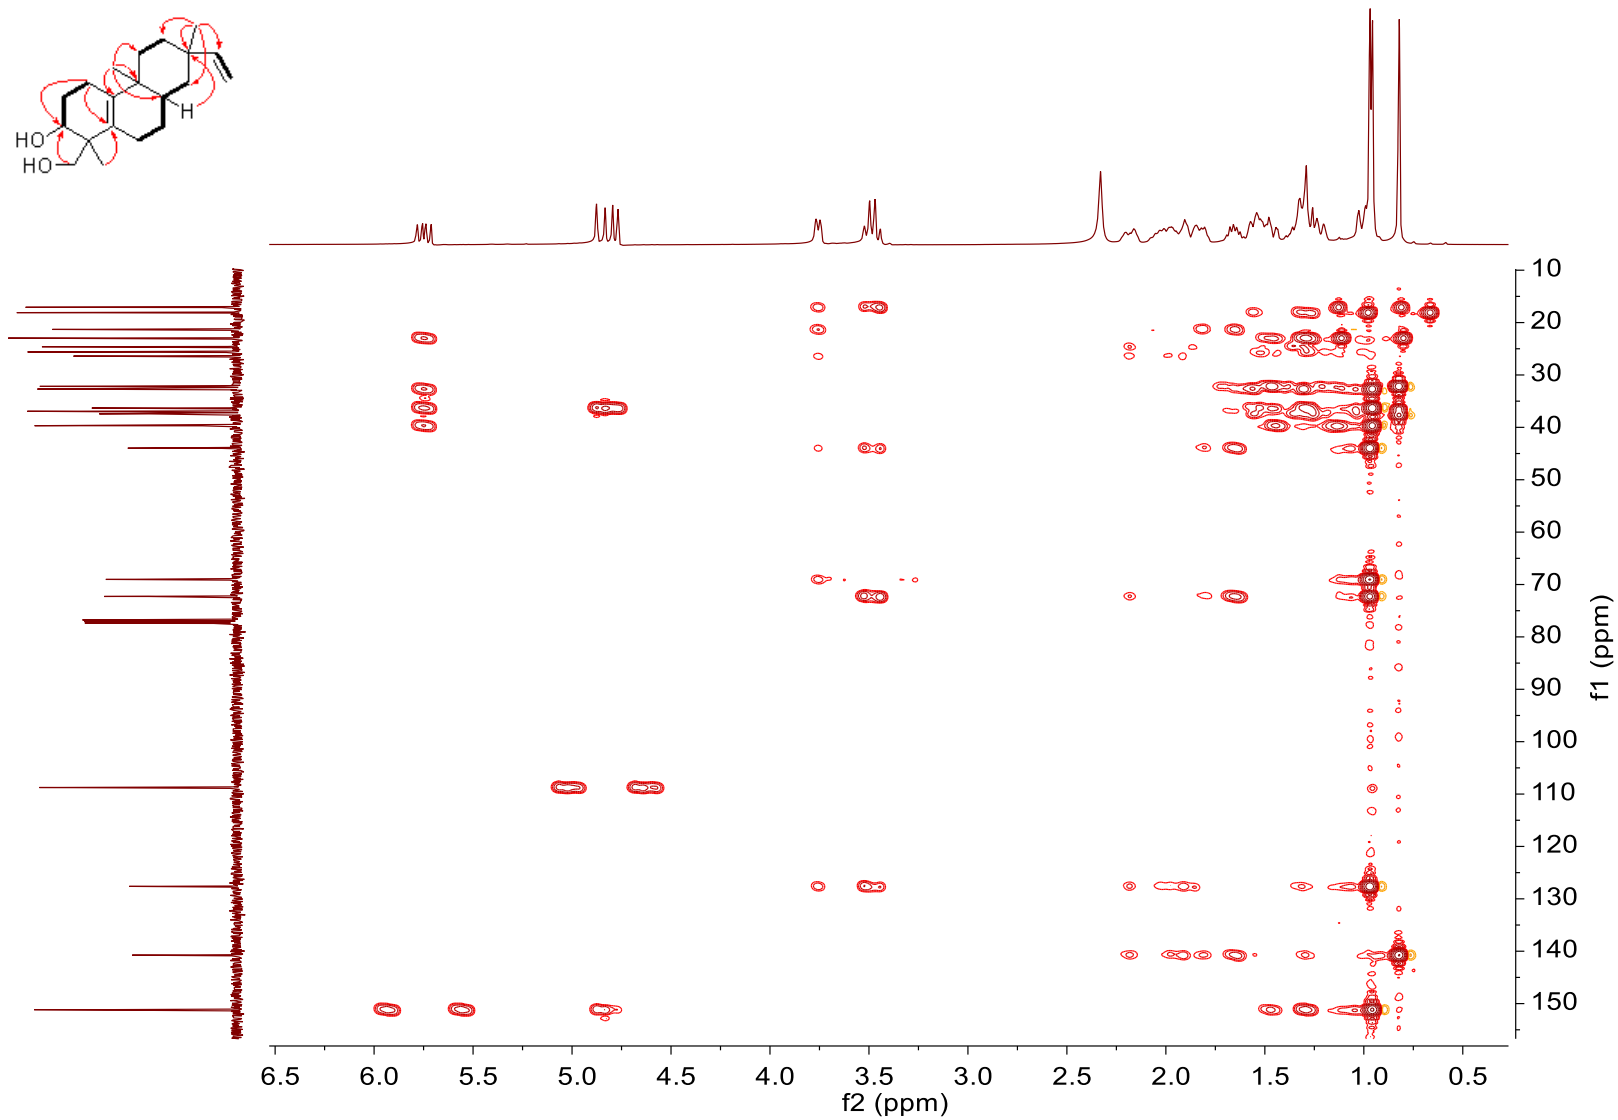

**Figure S15.** The HMBC Spectrum of Compound **2** in  $\text{CDCl}_3$



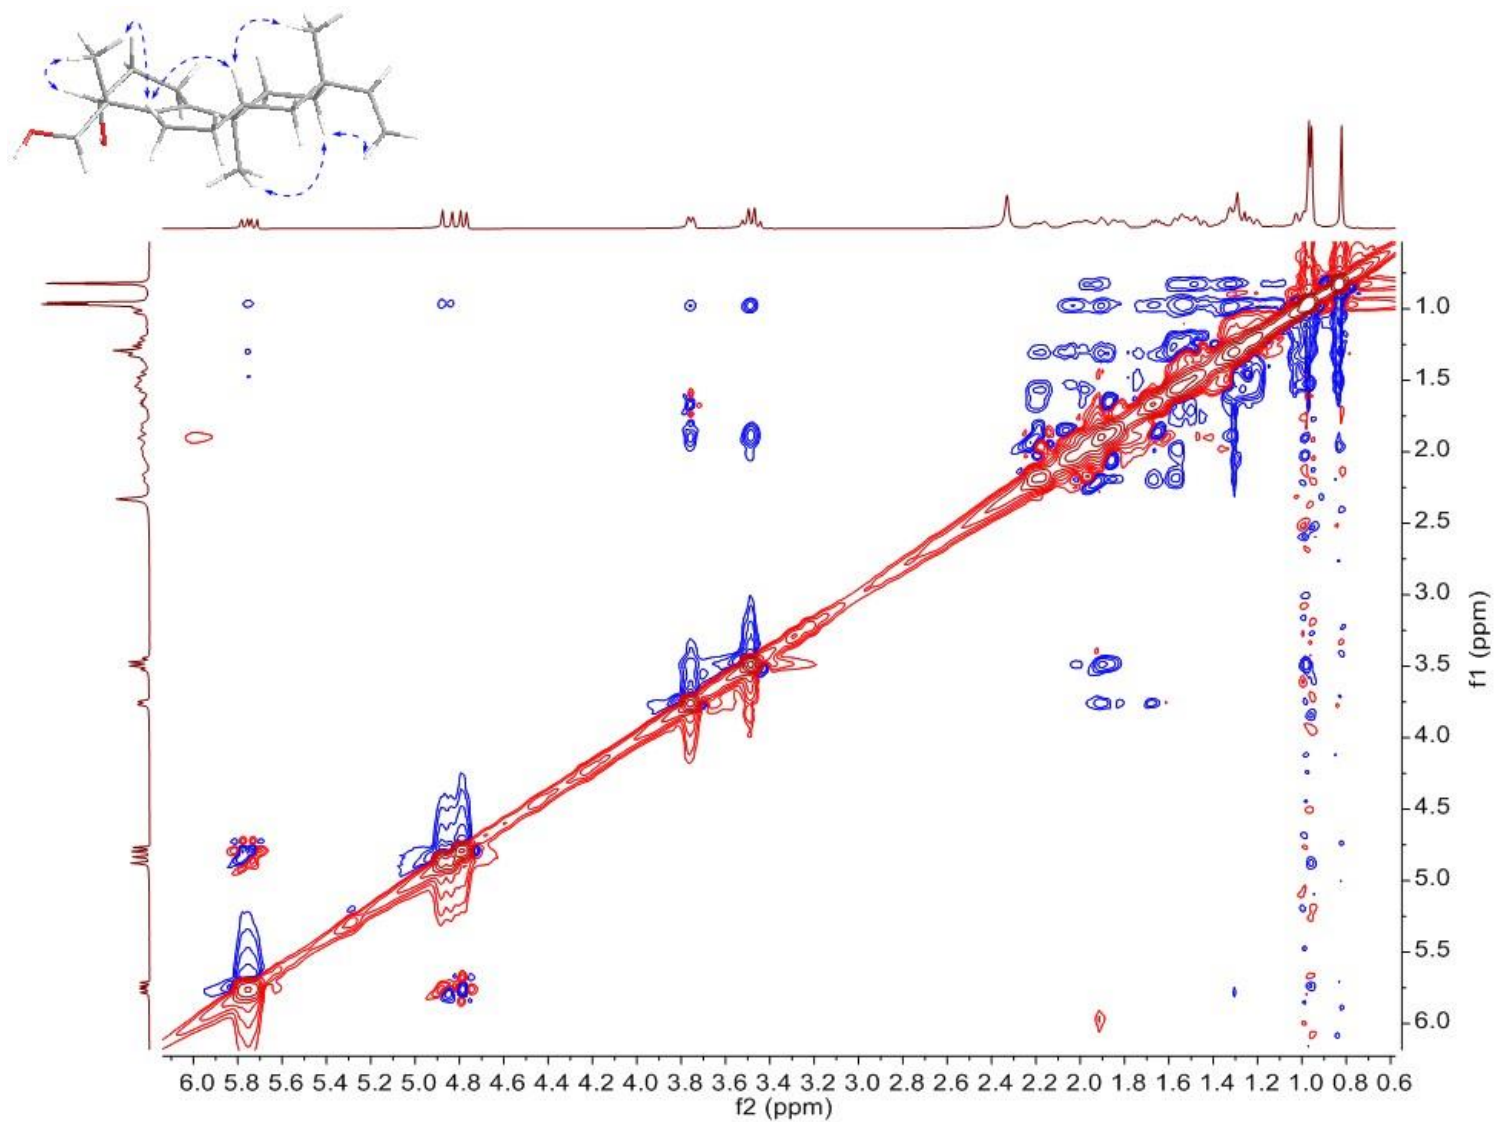

**Figure S16.** The NOESY Spectrum of Compound **2** in CDCl<sub>3</sub>

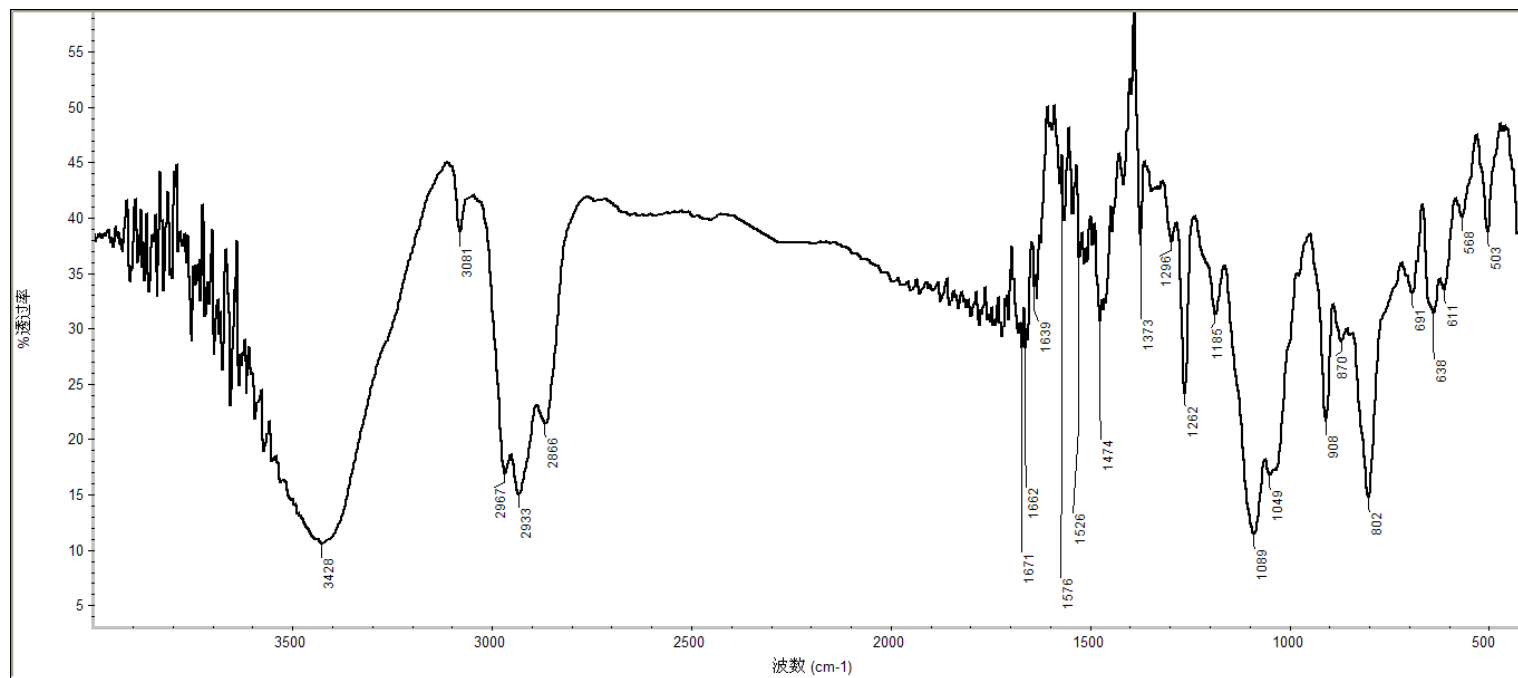

**Figure S17.** The IR Spectra of Compound **3**

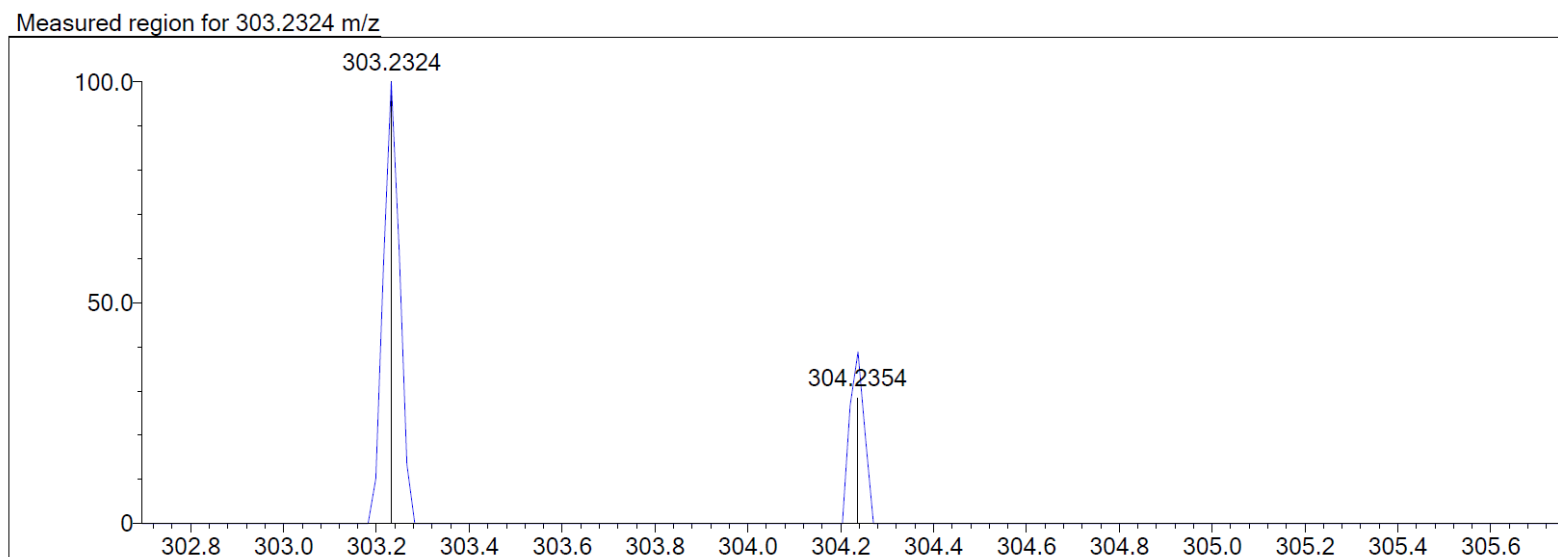


---

SPECTRUM -

simulation :

---

| m/z      | Theo. Mass | Delta (ppm) | RDB equiv. | Composition                                    |
|----------|------------|-------------|------------|------------------------------------------------|
| 303.2324 | 303.2330   | -1.98       | 5.0        | C <sub>20</sub> H <sub>31</sub> O <sub>2</sub> |

---

**Figure S18.** The HRESIMS Spectroscopic Data of Compound **3**

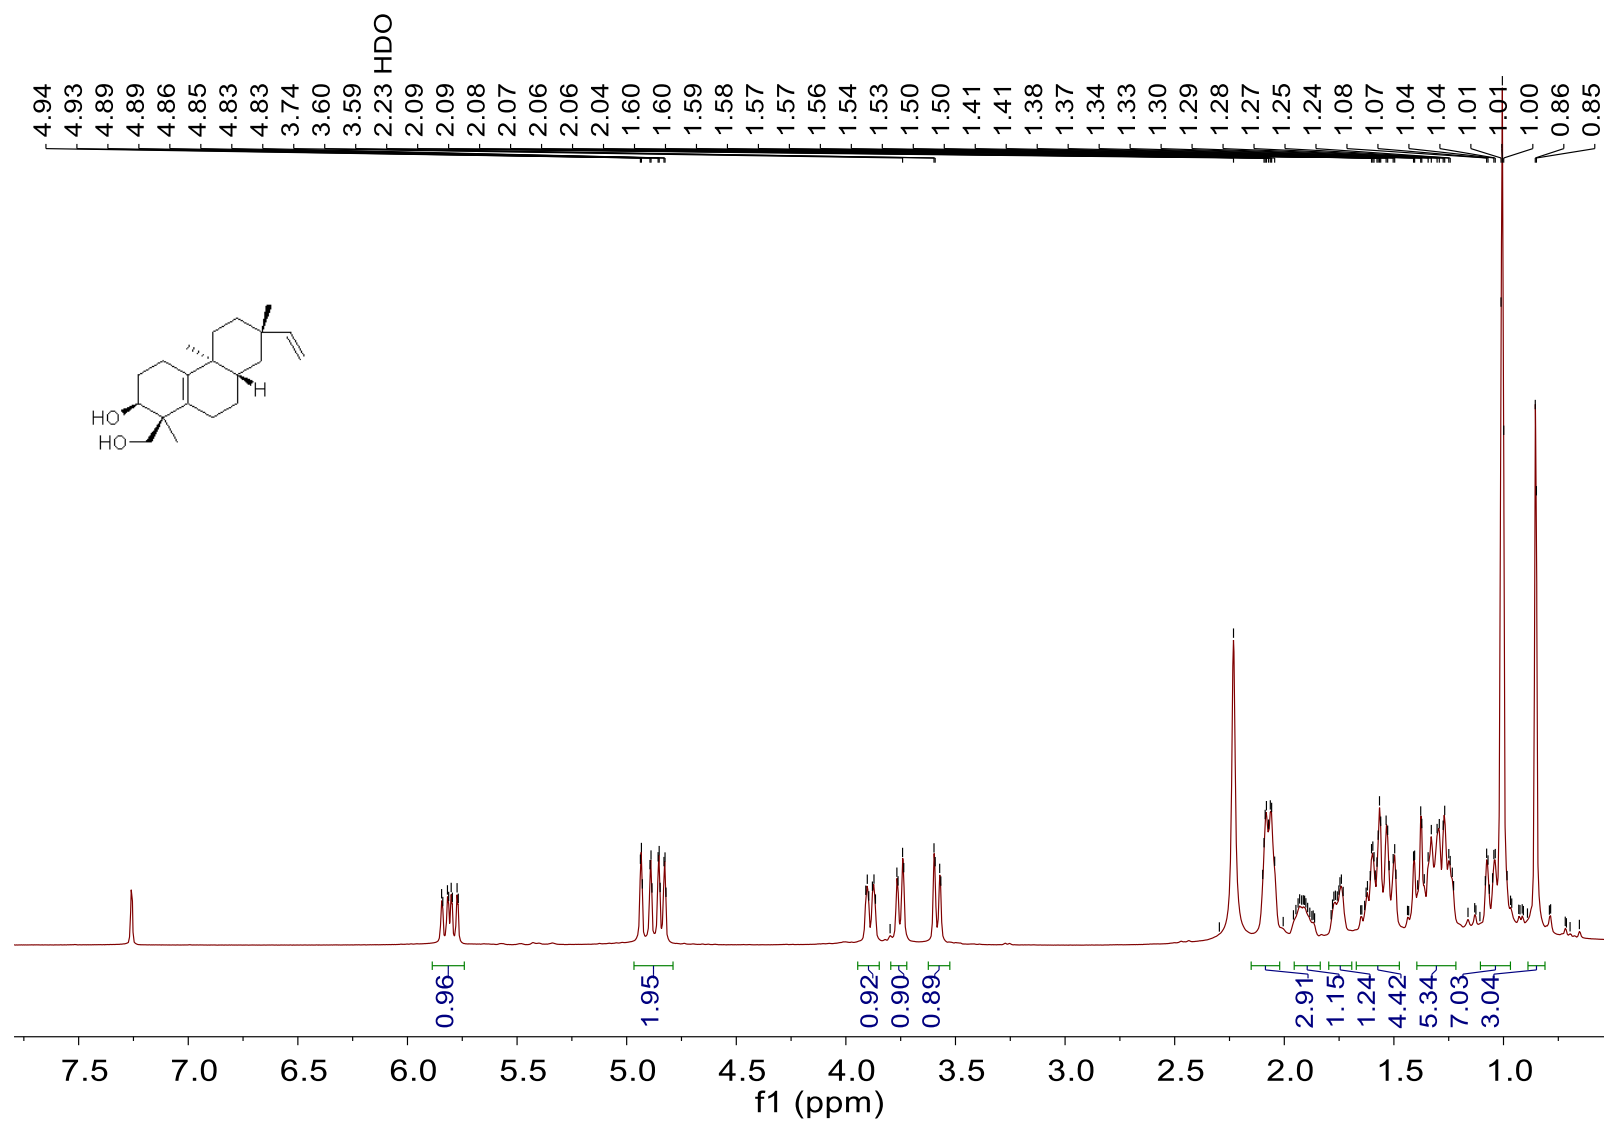

**Figure S19.** The  $^1\text{H}$  NMR Spectrum of Compound **3** in  $\text{CDCl}_3$

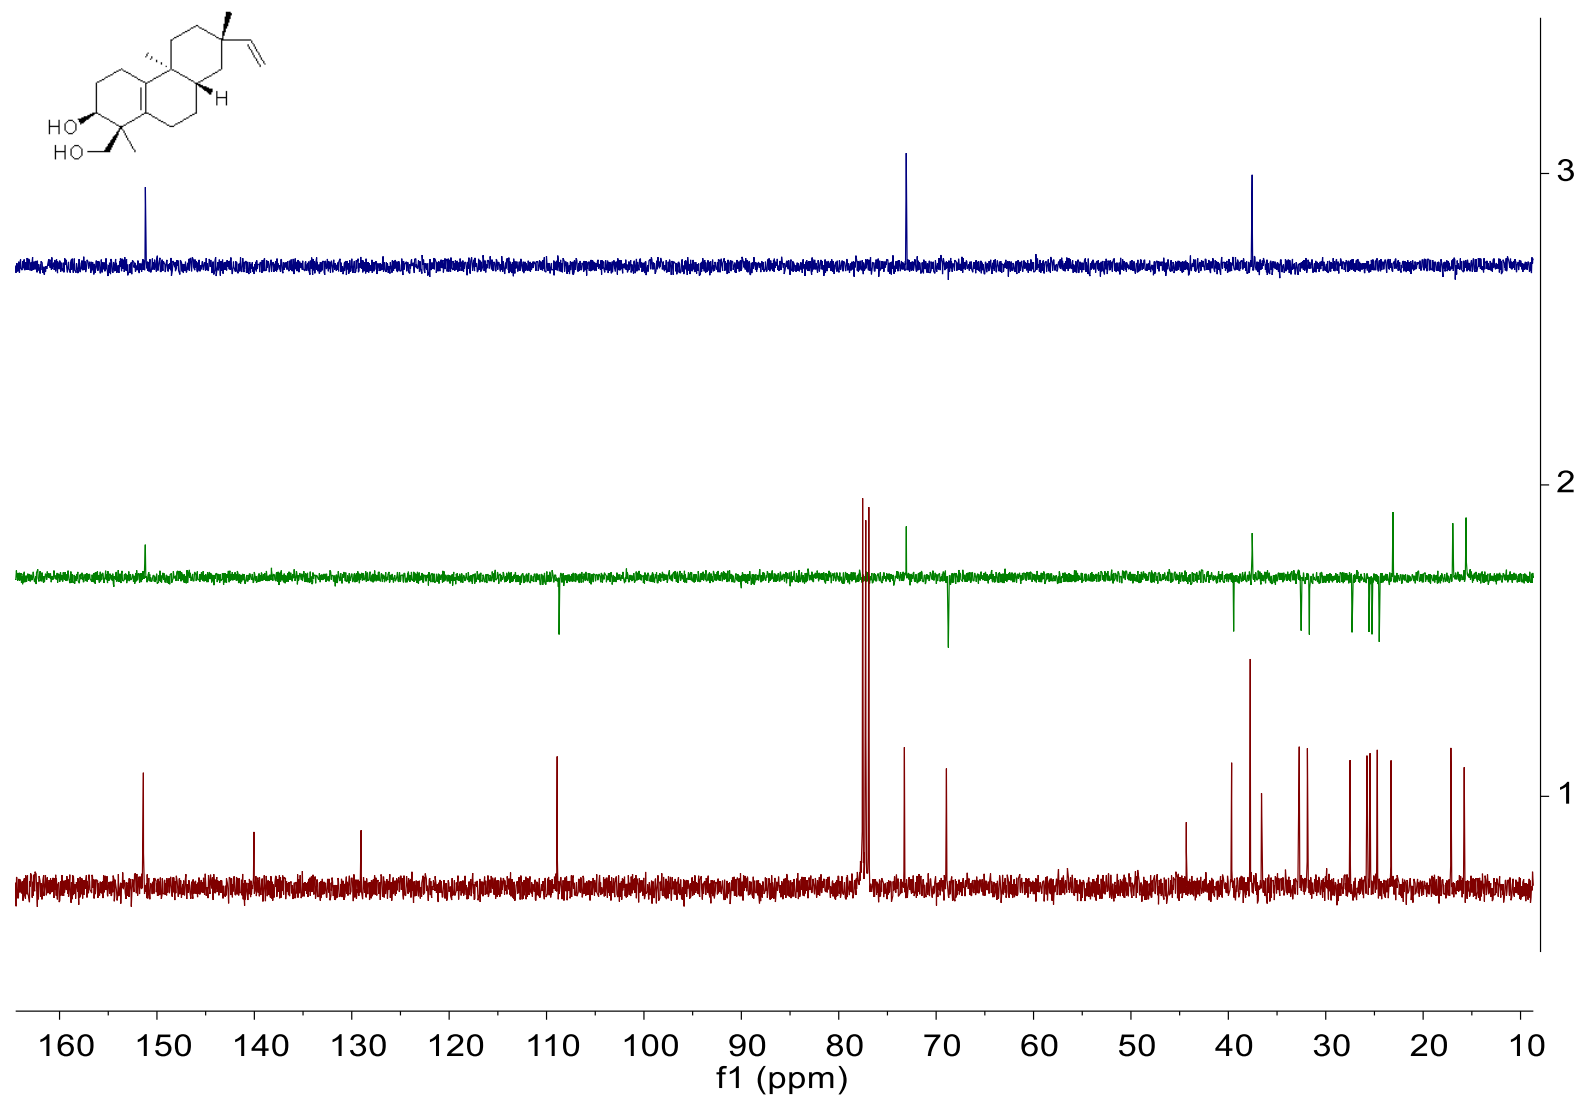

**Figure S20.** The  $^{13}\text{C}$  NMR Spectrum of Compound **3** in  $\text{CDCl}_3$

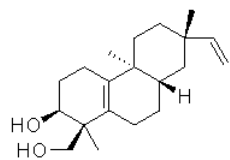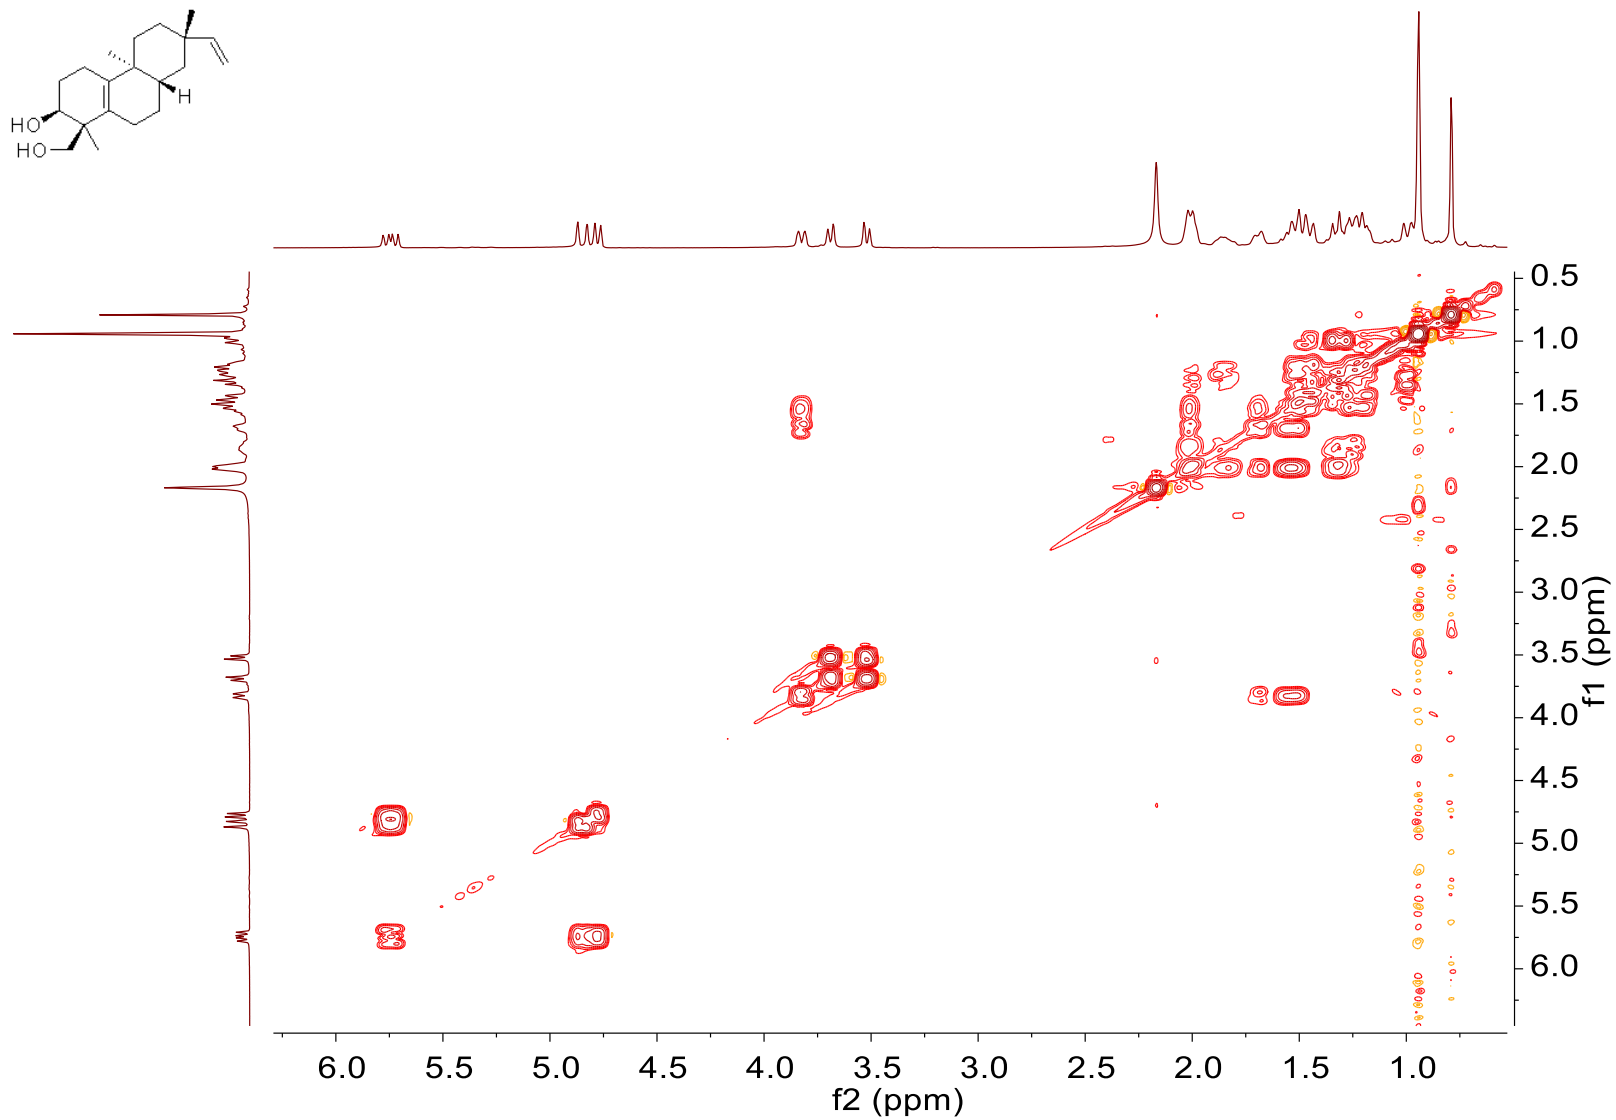

**Figure S21.** The  $^1\text{H}$ - $^1\text{H}$  COSY Spectrum of Compound 3 in  $\text{CDCl}_3$

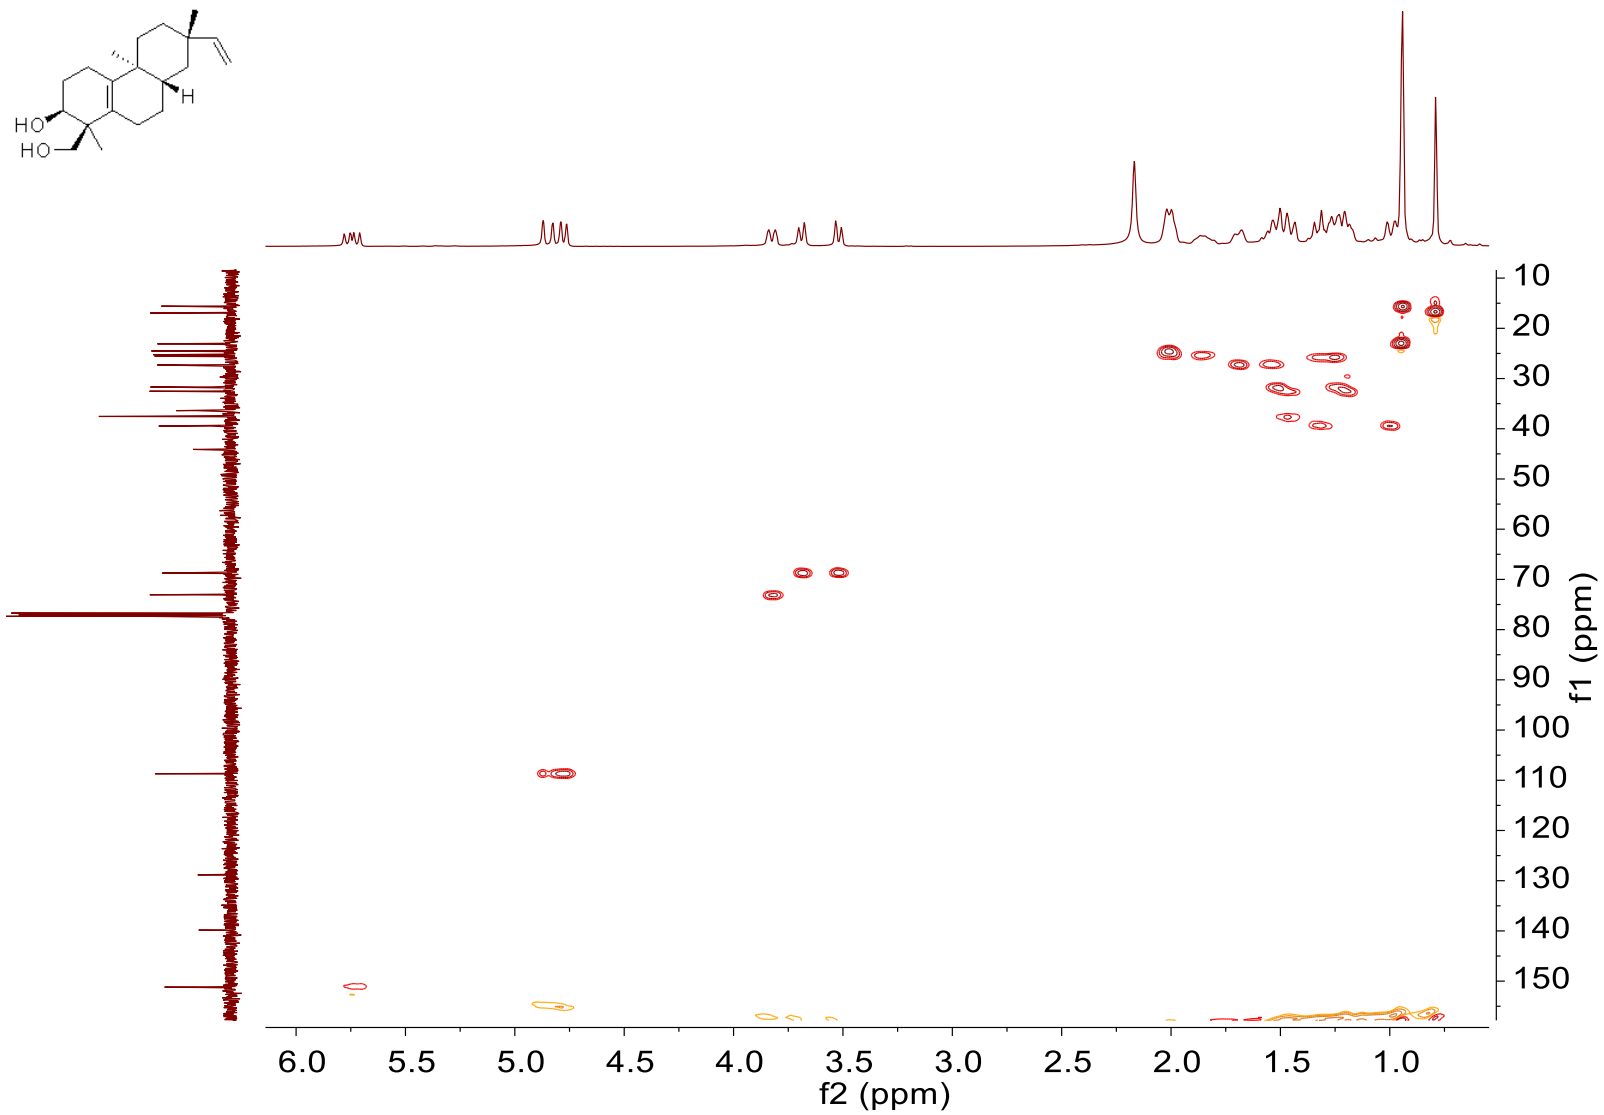

**Figure S22.** The HSQC Spectrum of Compound **3** in  $\text{CDCl}_3$

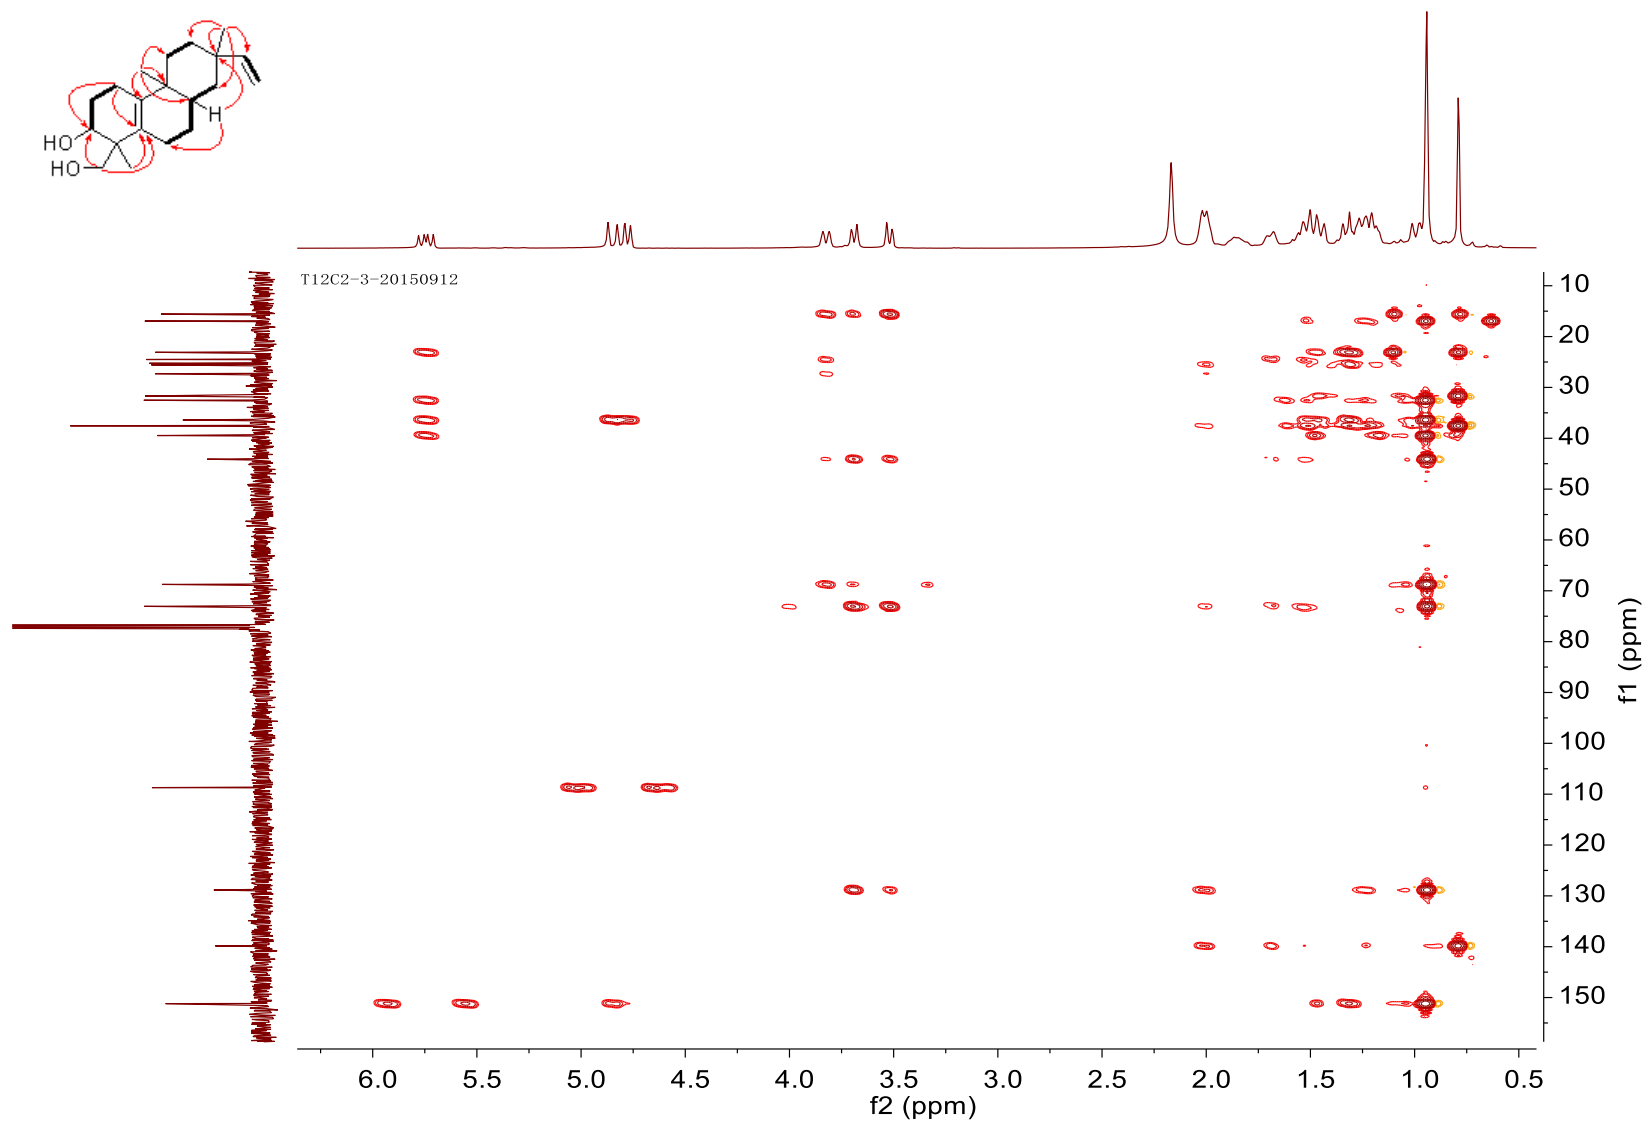

**Figure S23.** The HMBC Spectrum of Compound **3** in  $\text{CDCl}_3$



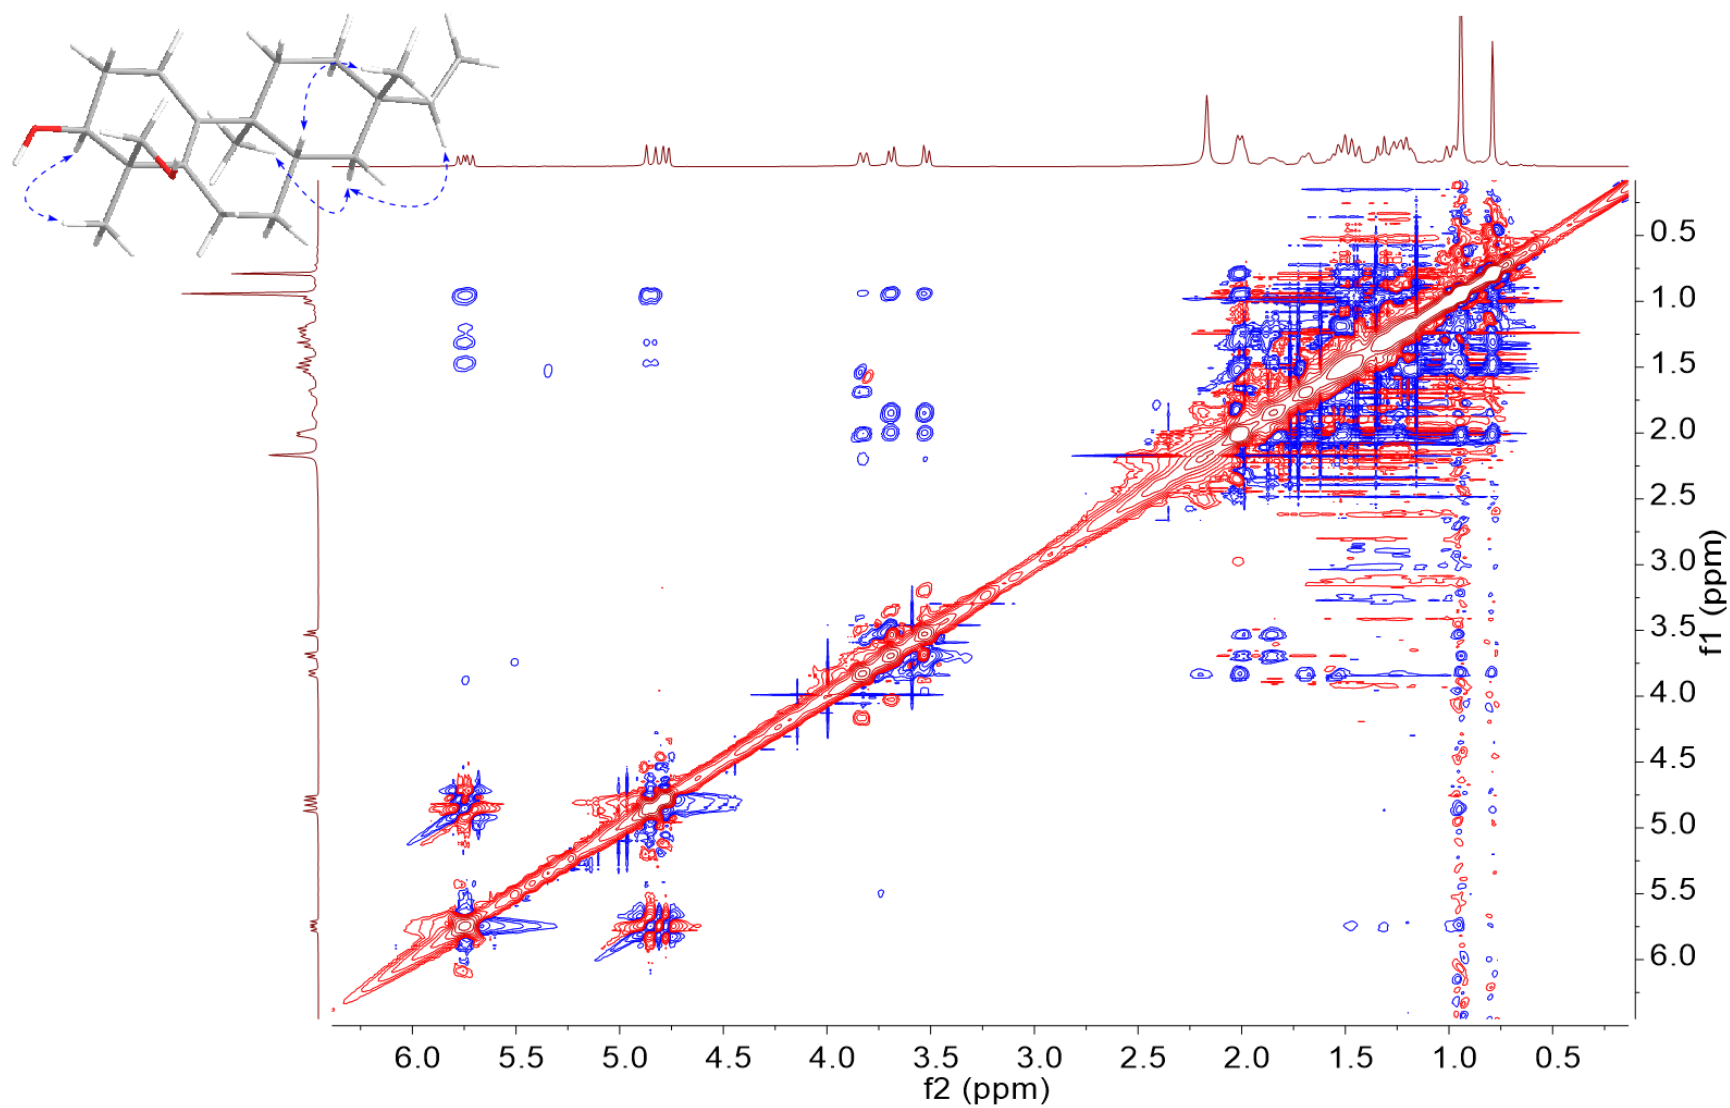

**Figure S24.** The NOESY Spectrum of Compound 3 in CDCl<sub>3</sub>

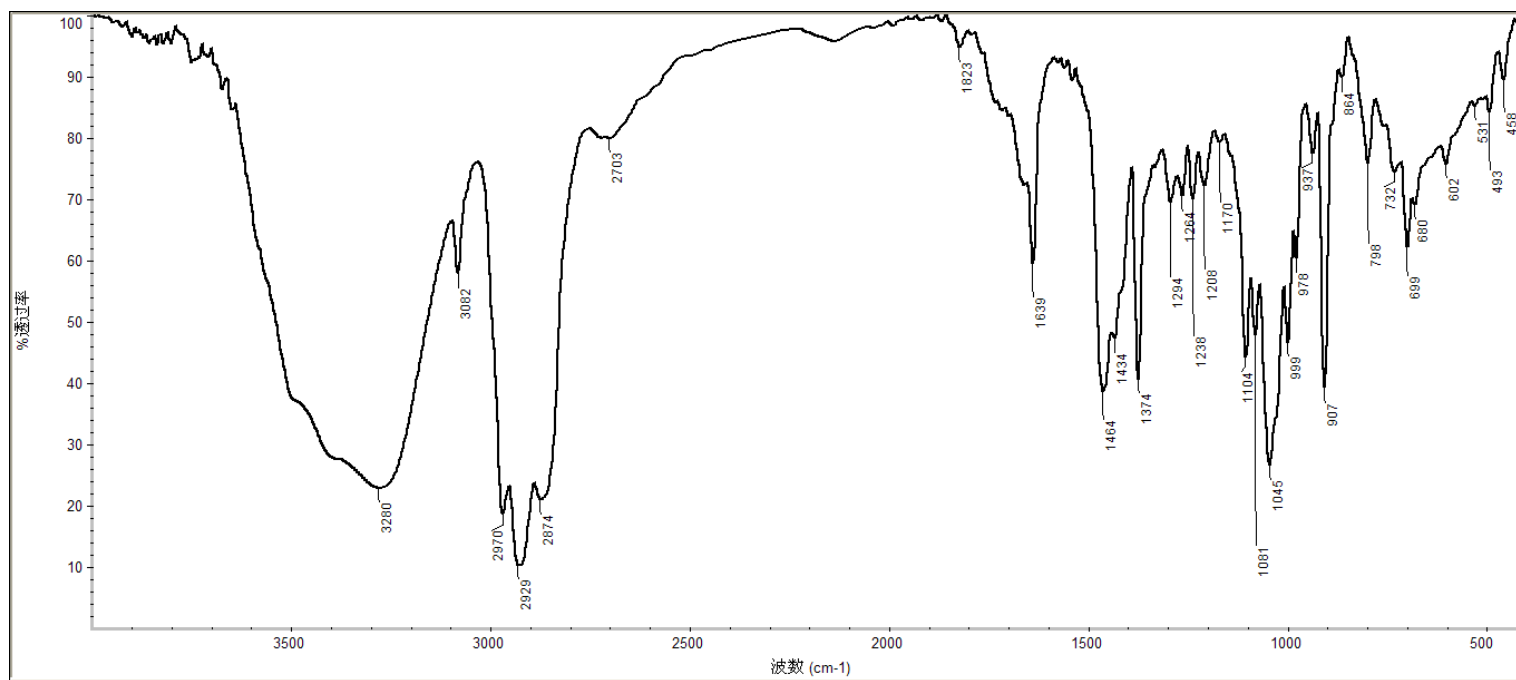

**Figure S25.** The IR Spectra of Compound **4**

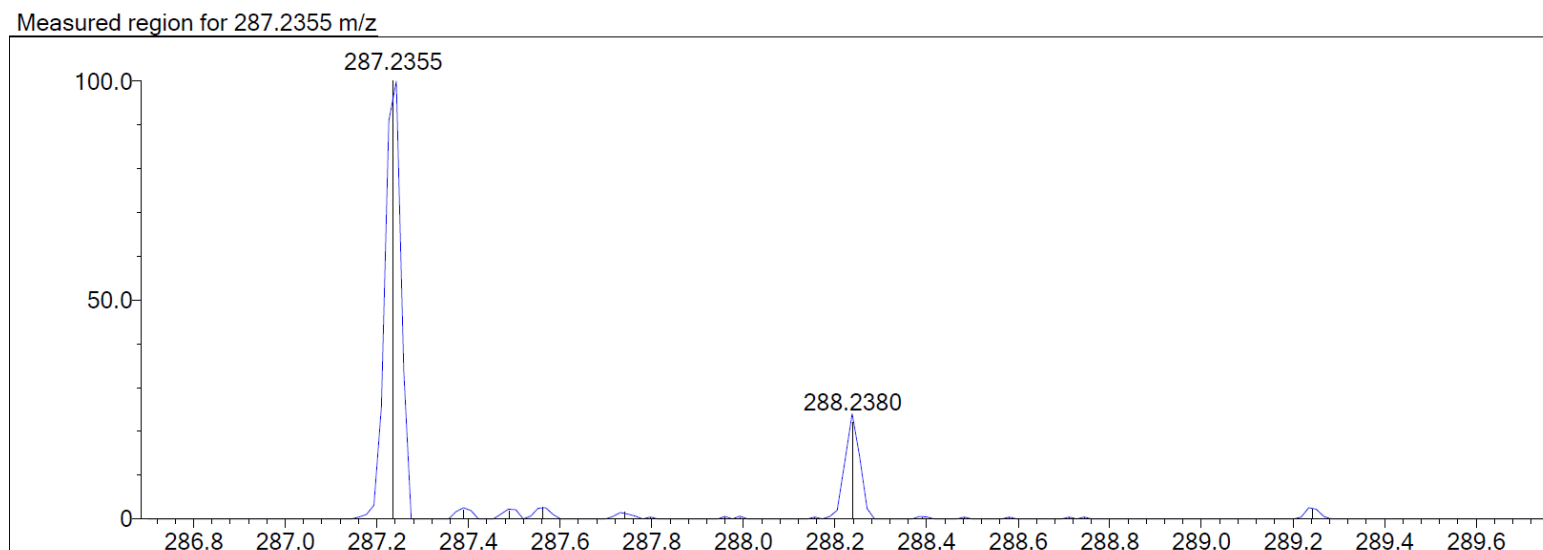


---

SPECTRUM -

simulation :

---

| m/z      | Theo. Mass | Delta (ppm) | RDB equiv. | Composition                       |
|----------|------------|-------------|------------|-----------------------------------|
| 287.2355 | 287.2369   | -4.87       | 6.0        | C <sub>20</sub> H <sub>31</sub> O |

---

**Figure S26.** The HRESIMS Spectroscopic Data of Compound **4**

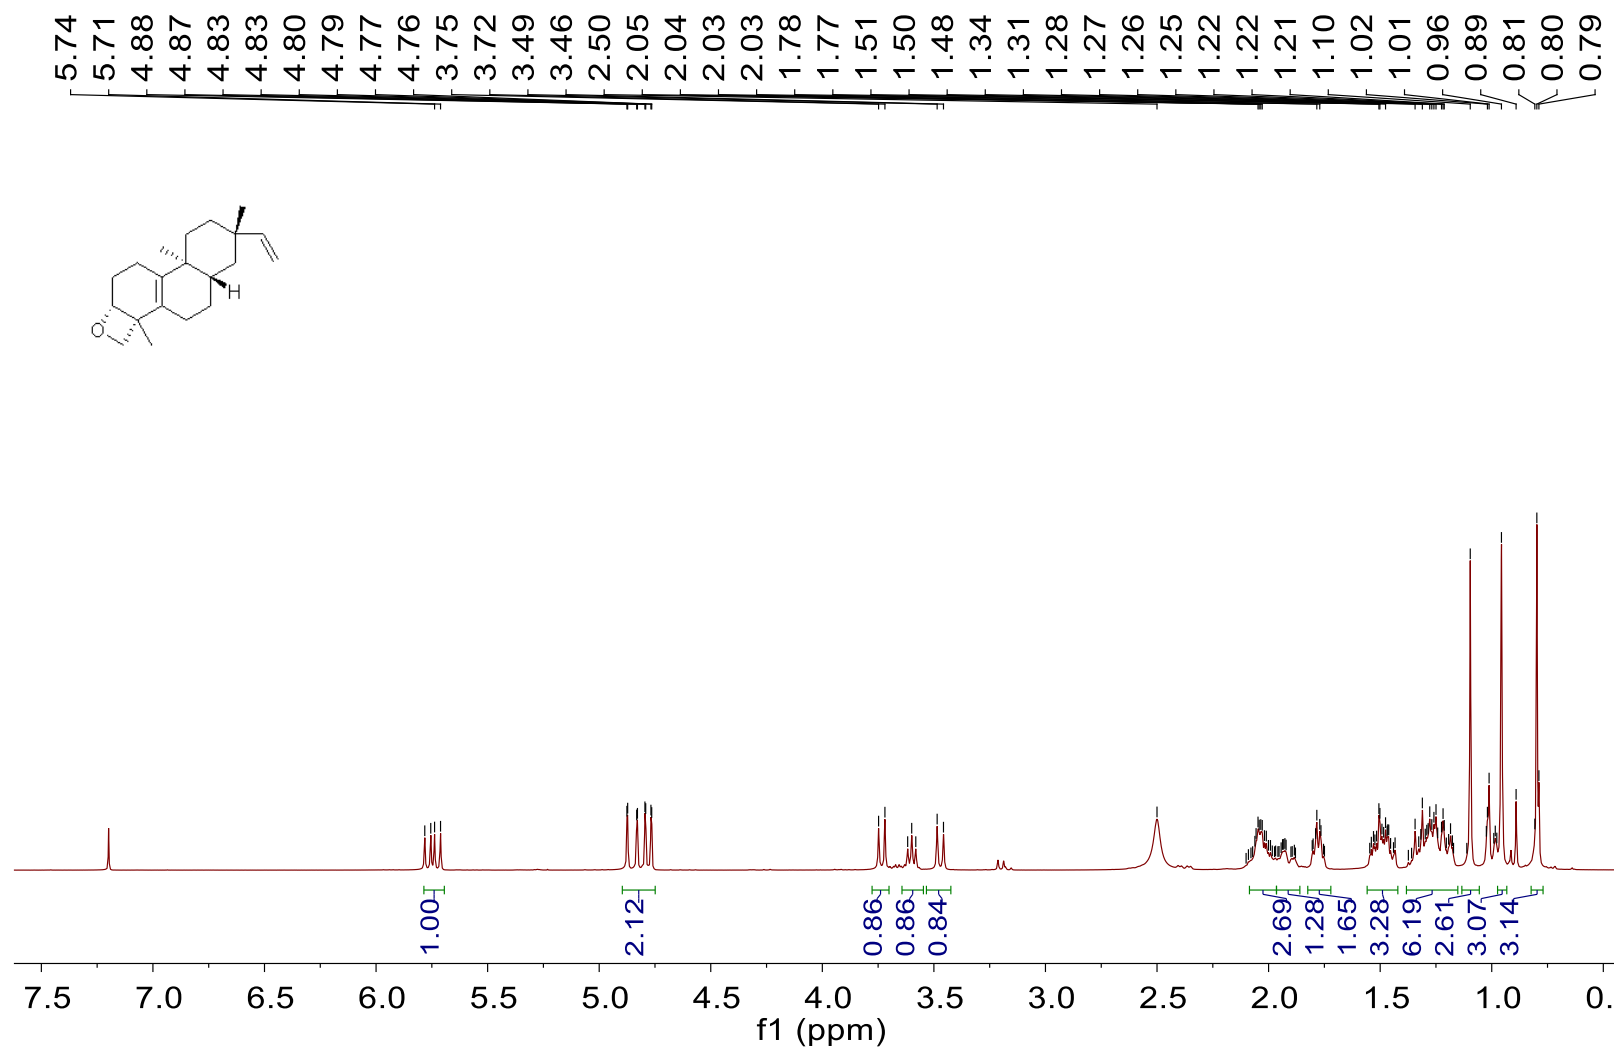

**Figure S27.** The <sup>1</sup>H NMR Spectrum of Compound **4** in CDCl<sub>3</sub>

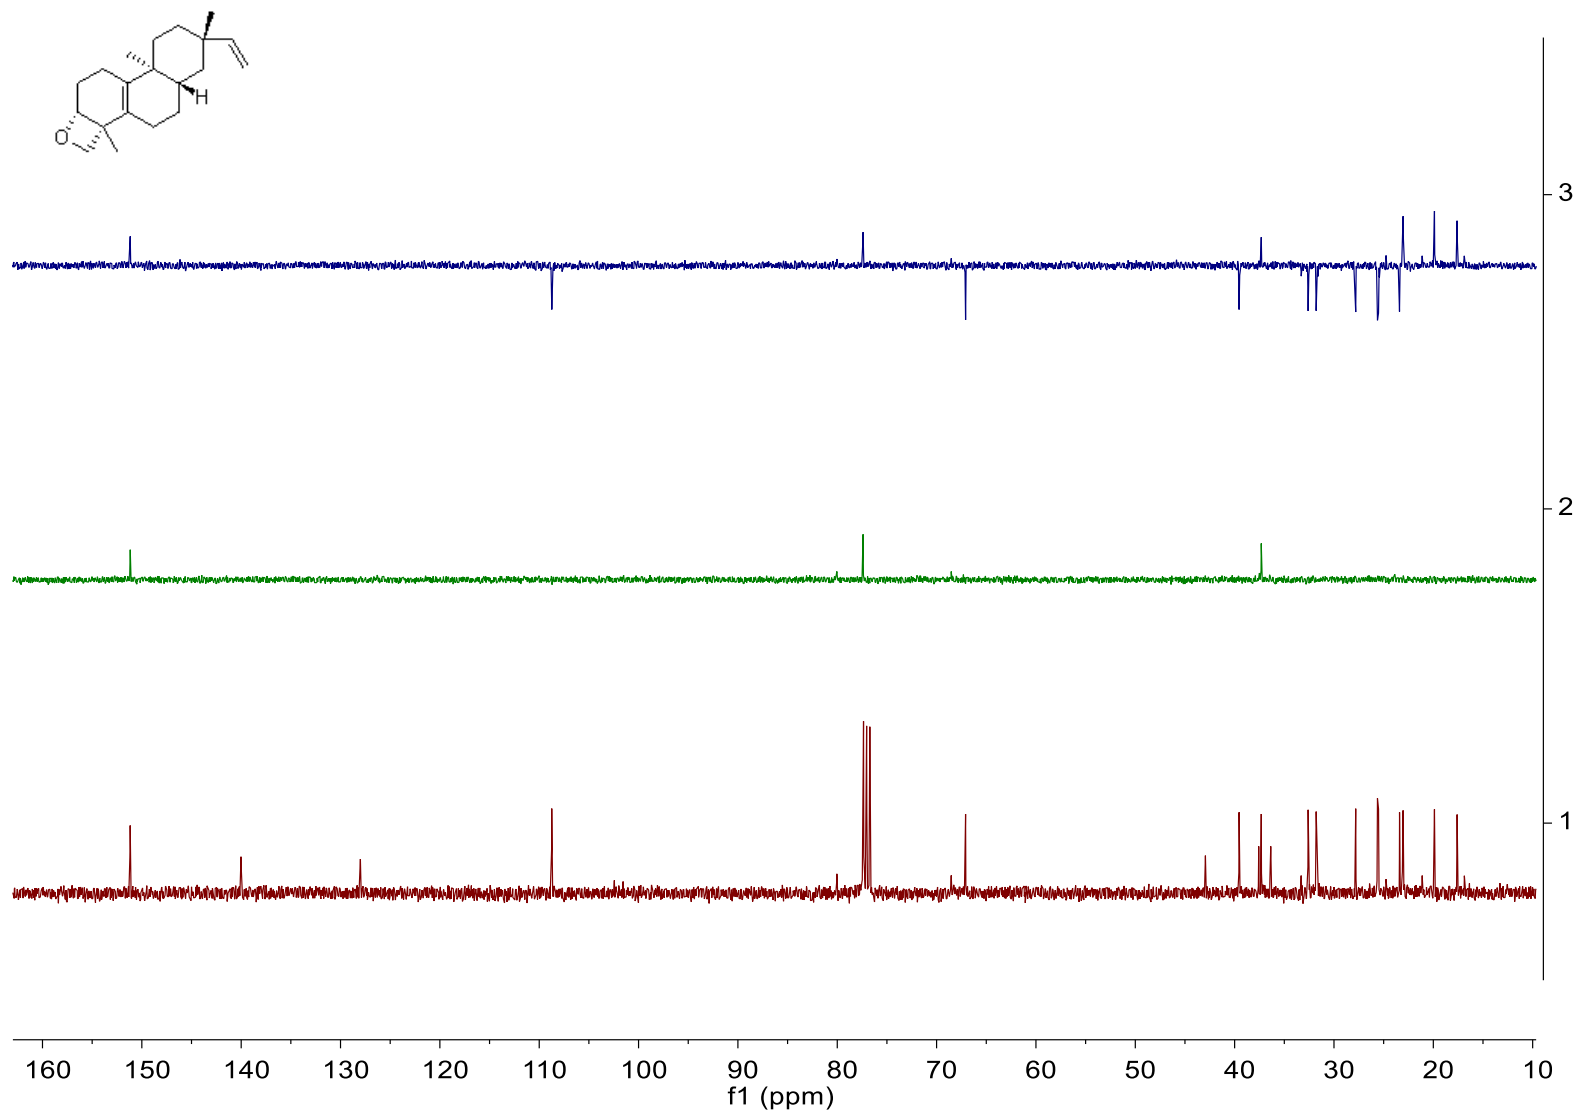

**Figure S28.** The  $^{13}\text{C}$  NMR Spectrum of Compound **4** in  $\text{CDCl}_3$

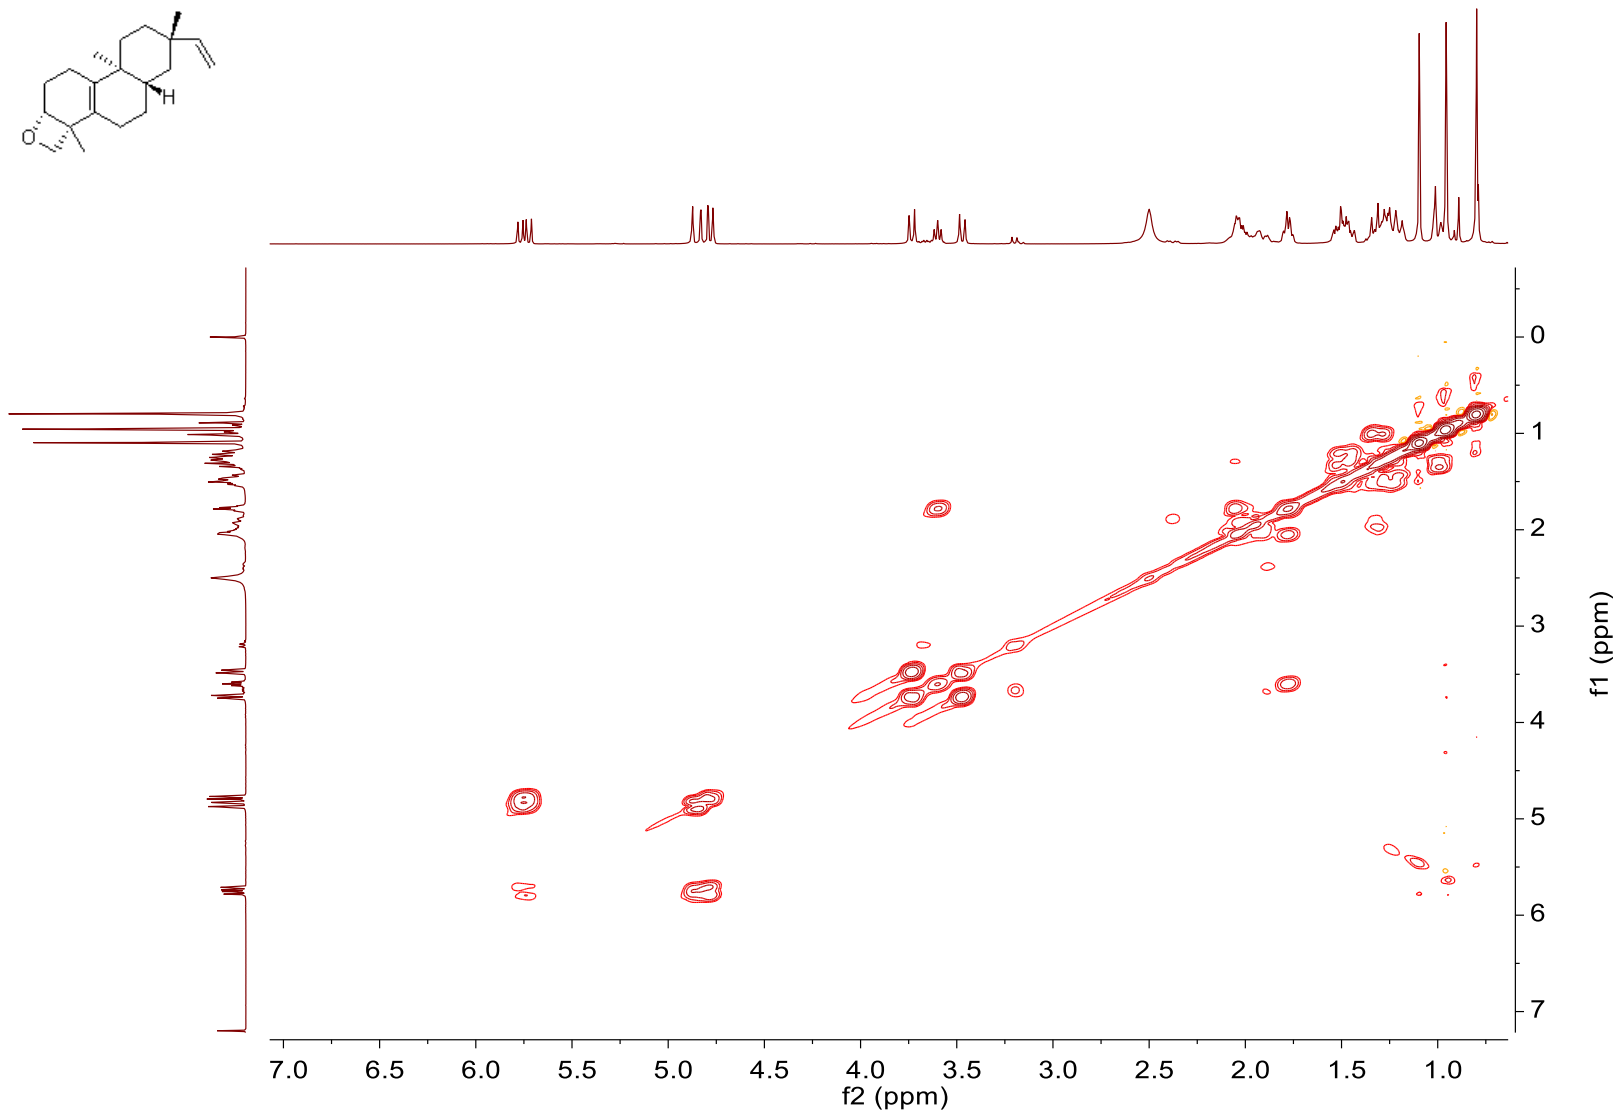

**Figure S29.** The  $^1\text{H}$ - $^1\text{H}$  COSY Spectrum of Compound **4** in  $\text{CDCl}_3$

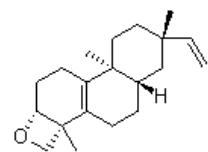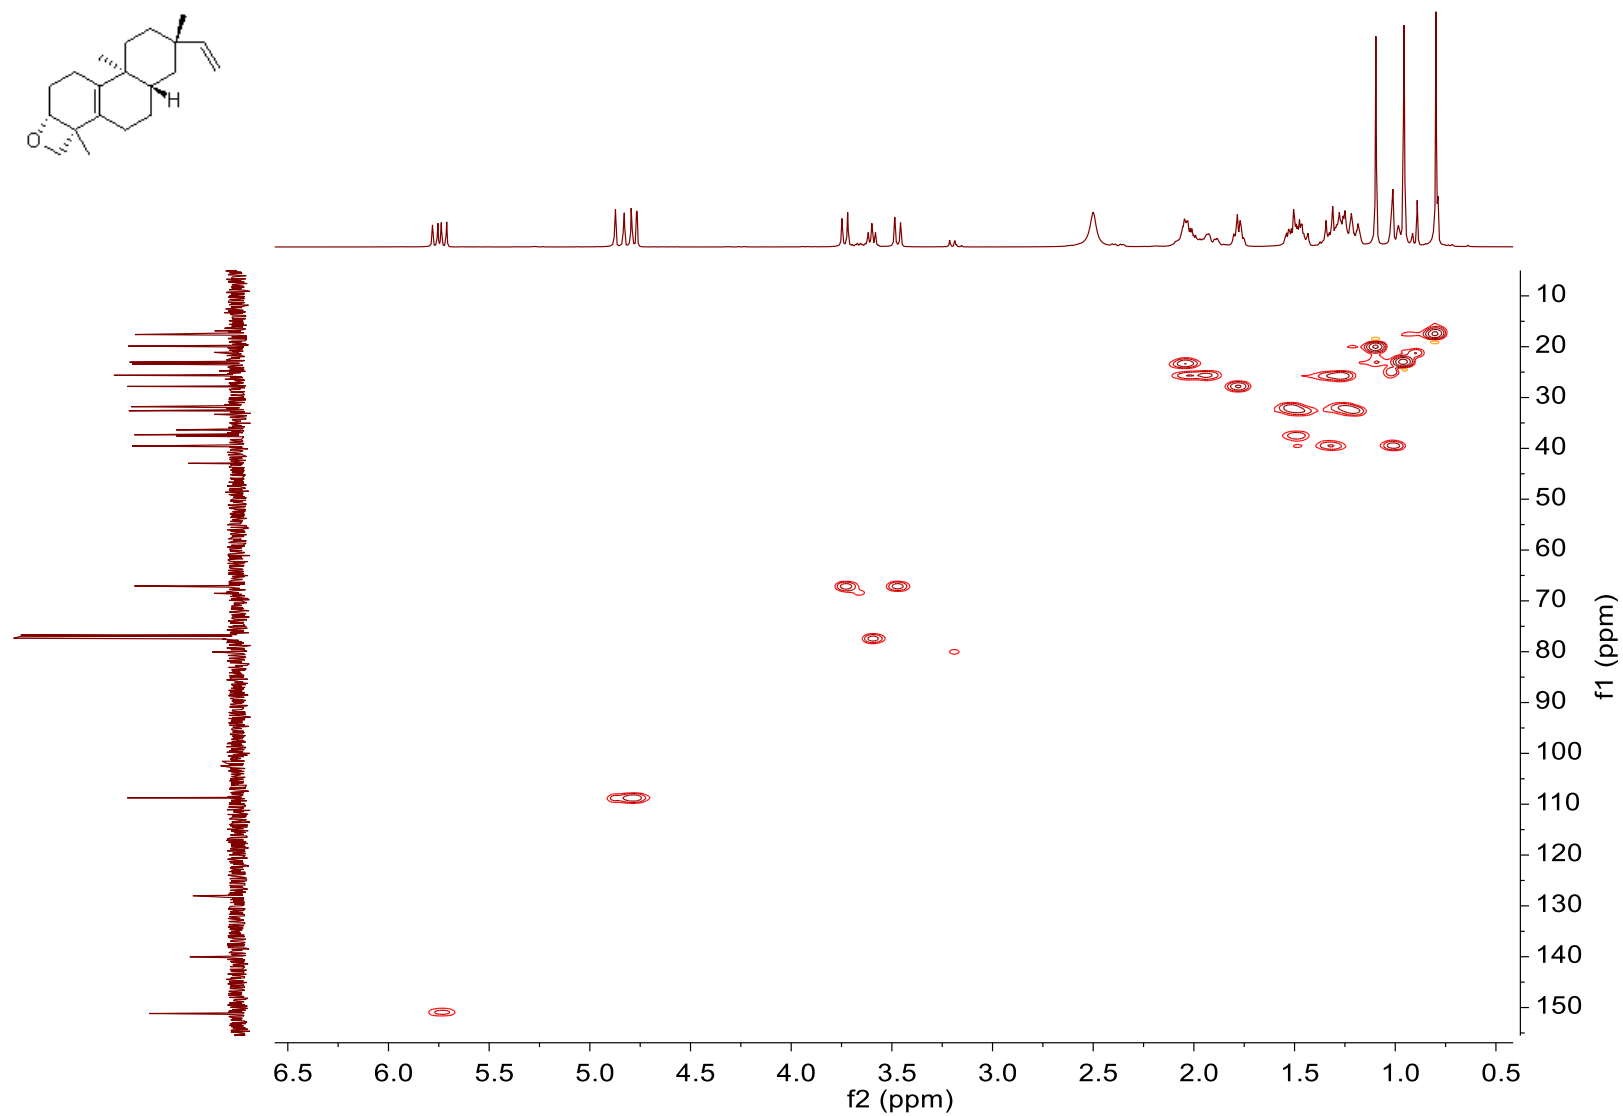

**Figure S30.** The HSQC Spectrum of Compound **4** in CDCl<sub>3</sub>

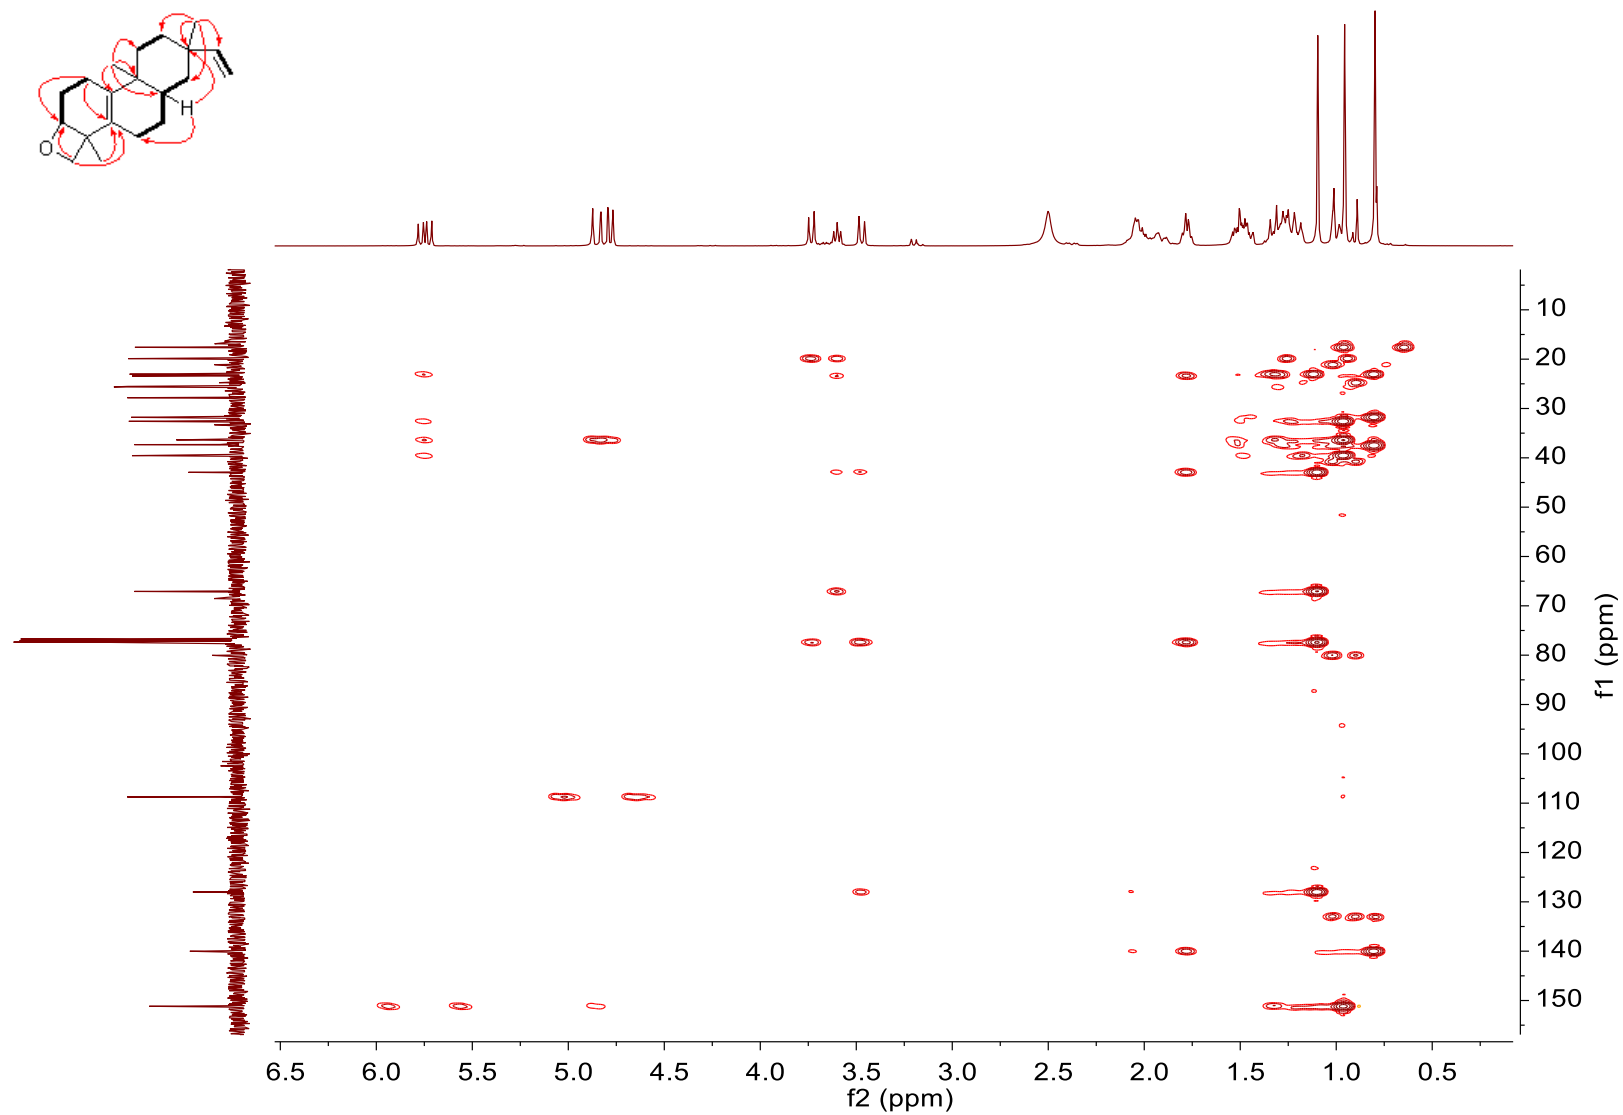

**Figure S31.** The HMBC Spectrum of Compound **4** in  $\text{CDCl}_3$



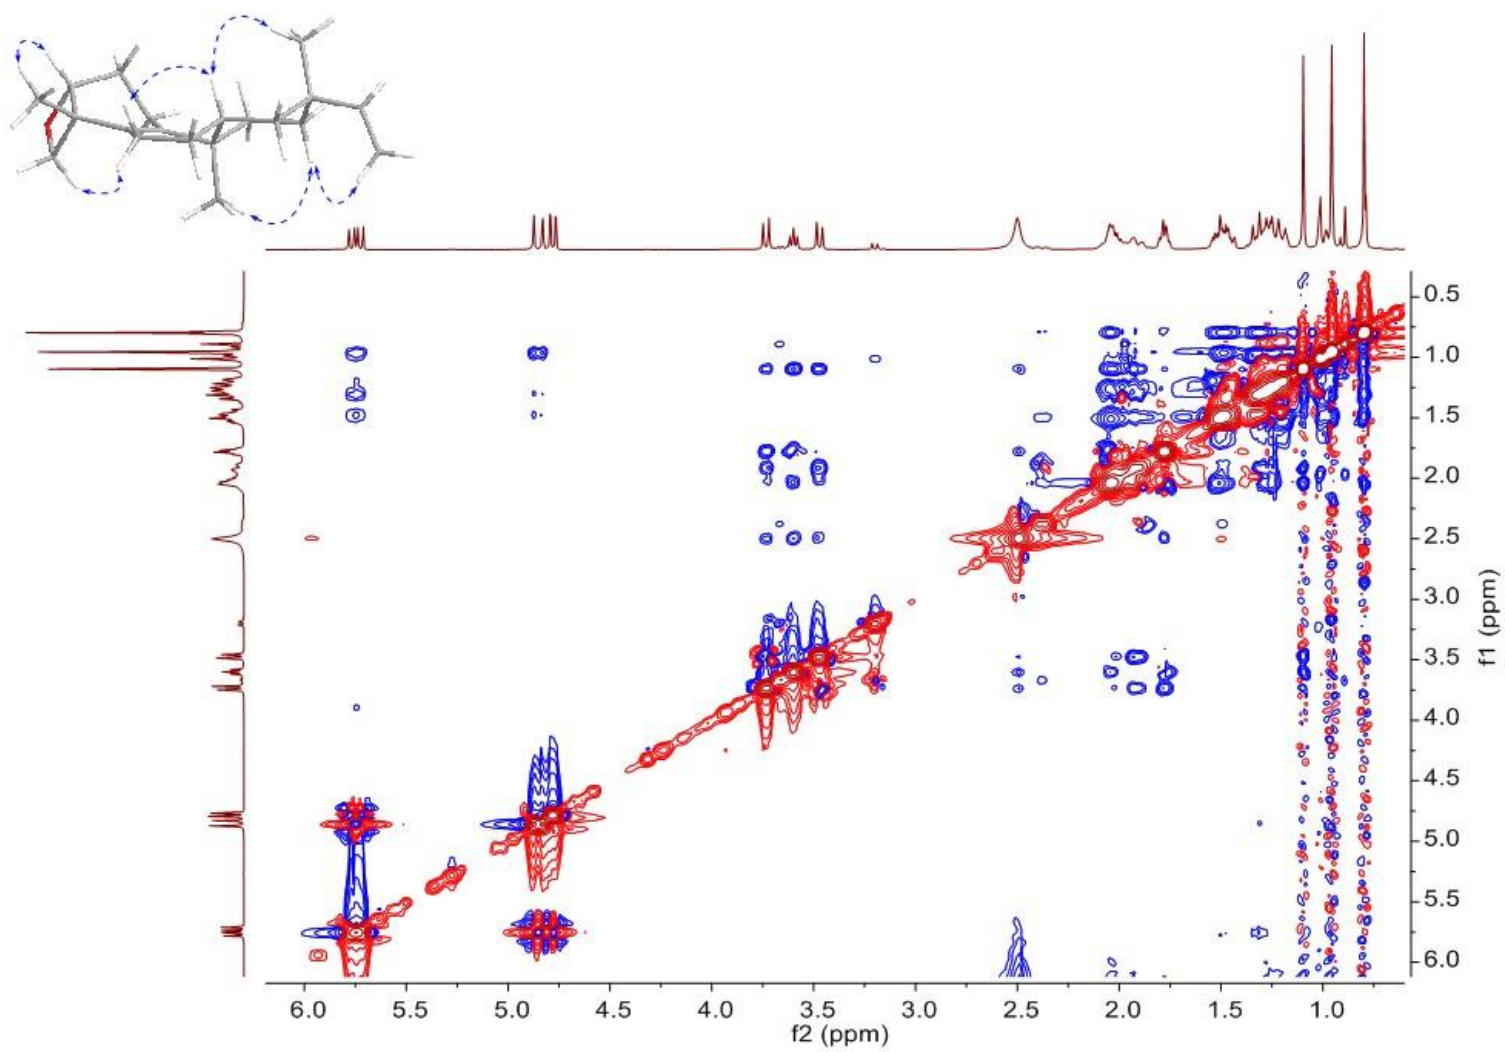

**Figure S32.** The NOESY Spectrum of Compound **4** in CDCl<sub>3</sub>

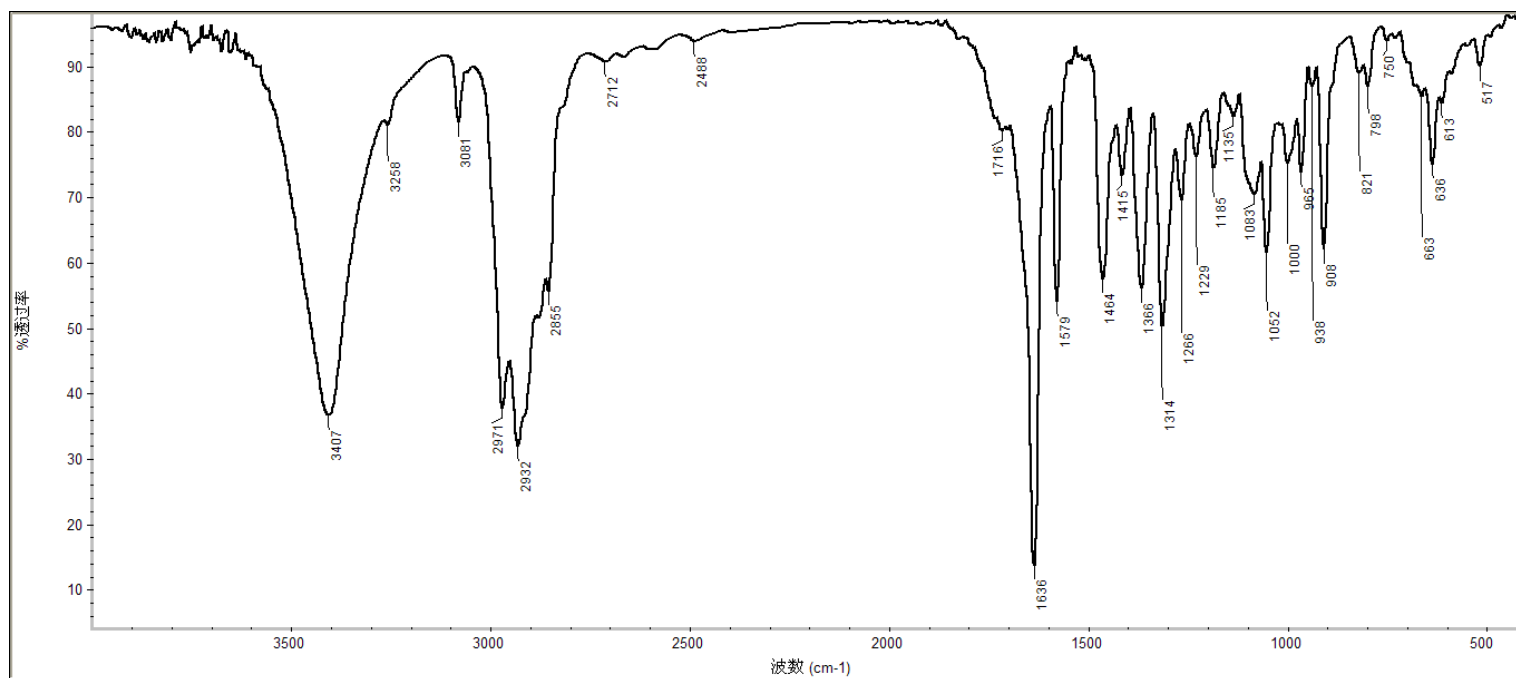

**Figure S33.** The IR Spectra of Compound **5**

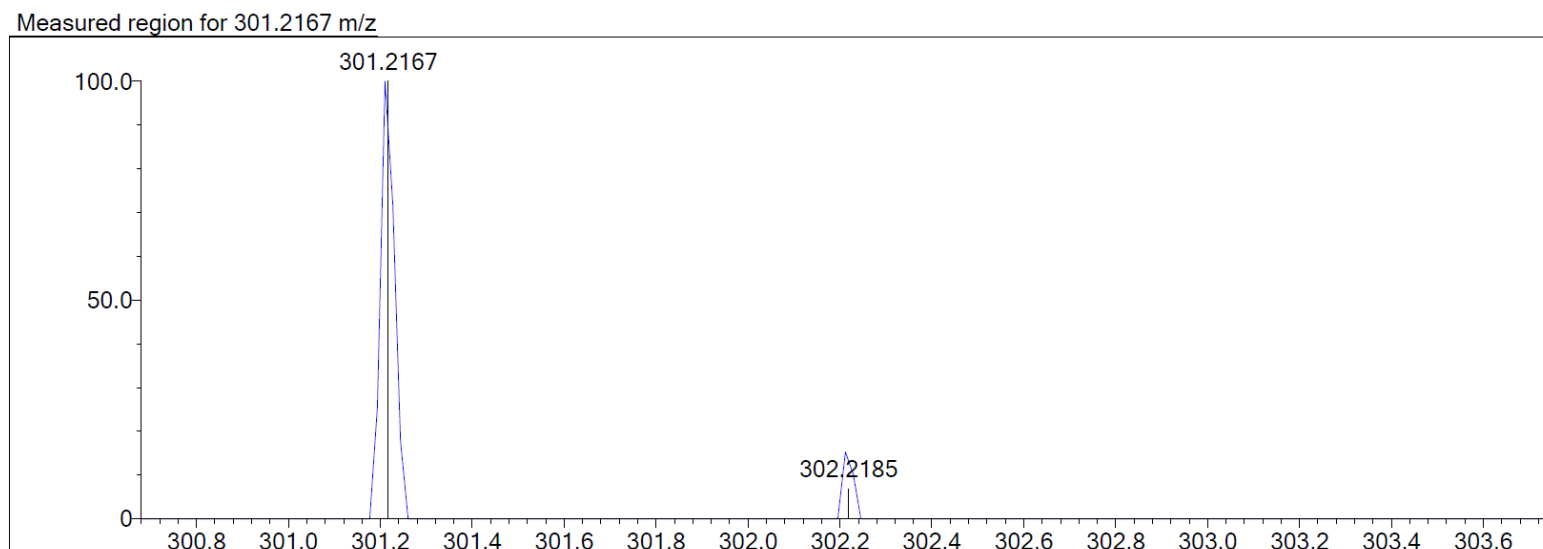


---

SPECTRUM -

simulation :

---

| m/z      | Theo. Mass | Delta (ppm) | RDB equiv. | Composition                                    |
|----------|------------|-------------|------------|------------------------------------------------|
| 301.2167 | 301.2173   | -1.99       | 6.0        | C <sub>20</sub> H <sub>29</sub> O <sub>2</sub> |

---

**Figure S34.** The HRESIMS Spectroscopic Data of Compound **5**

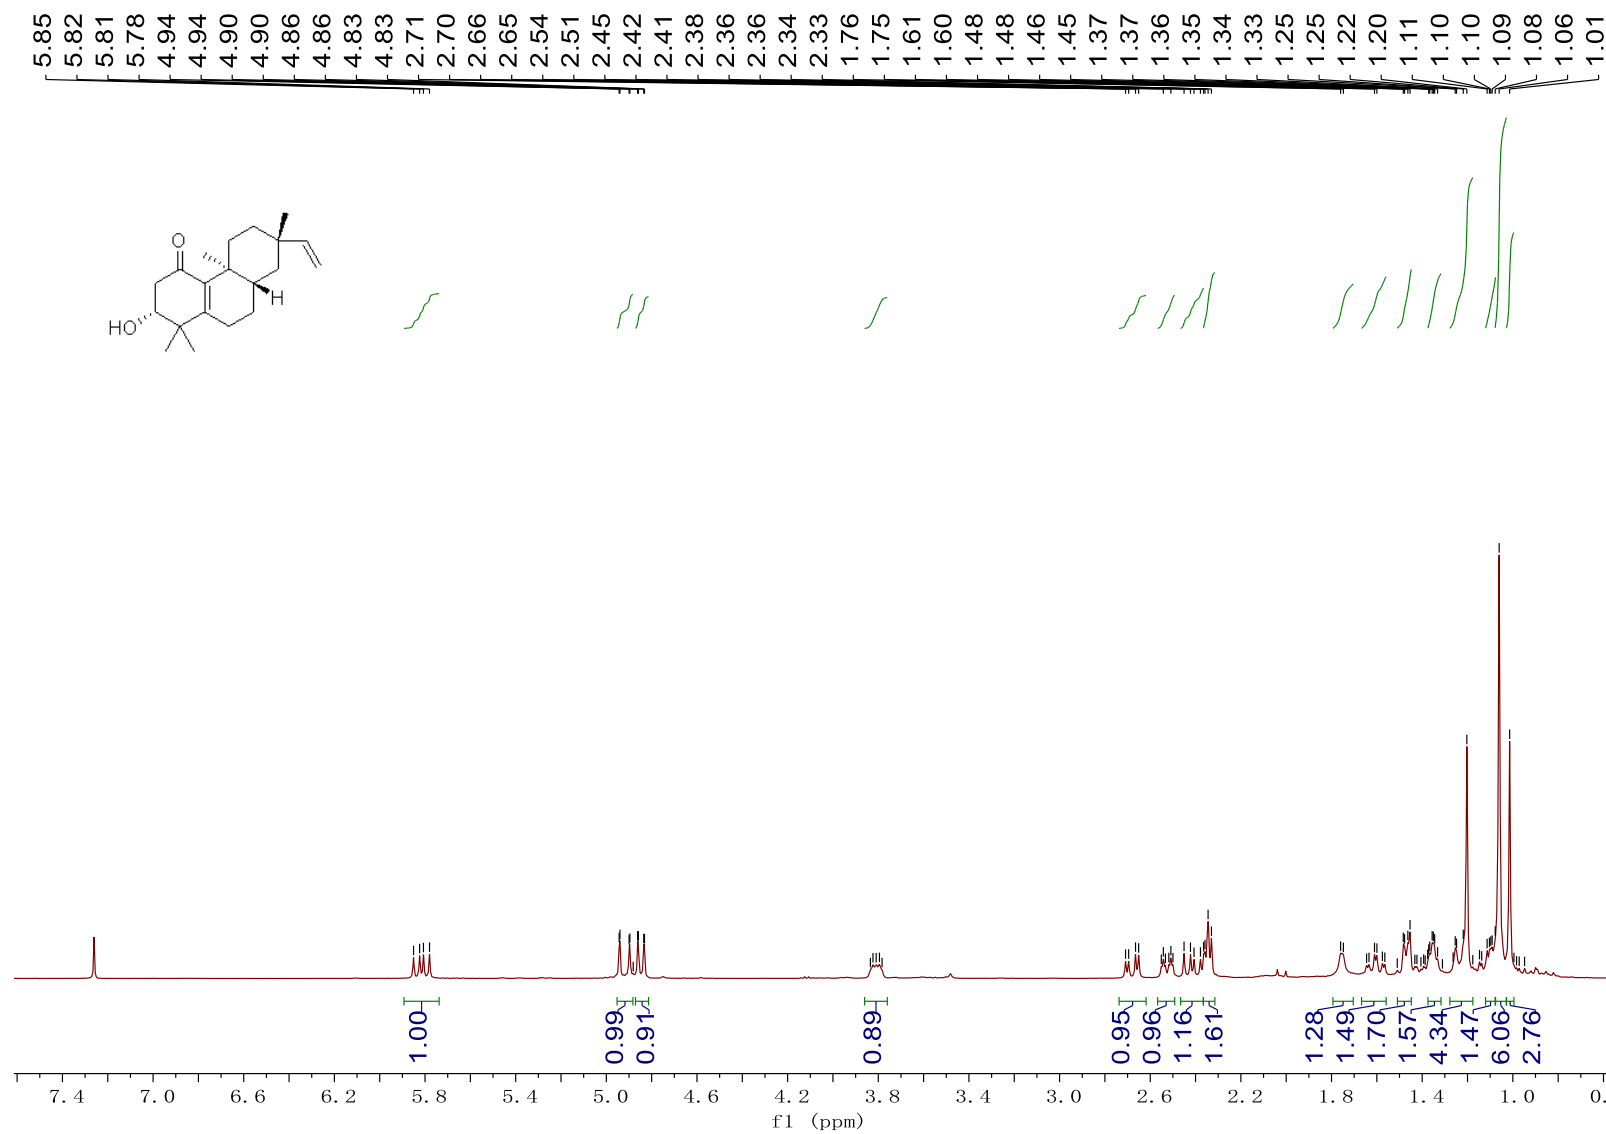

**Figure S35.** The  $^1\text{H}$  NMR Spectrum of Compound 5 in  $\text{CDCl}_3$

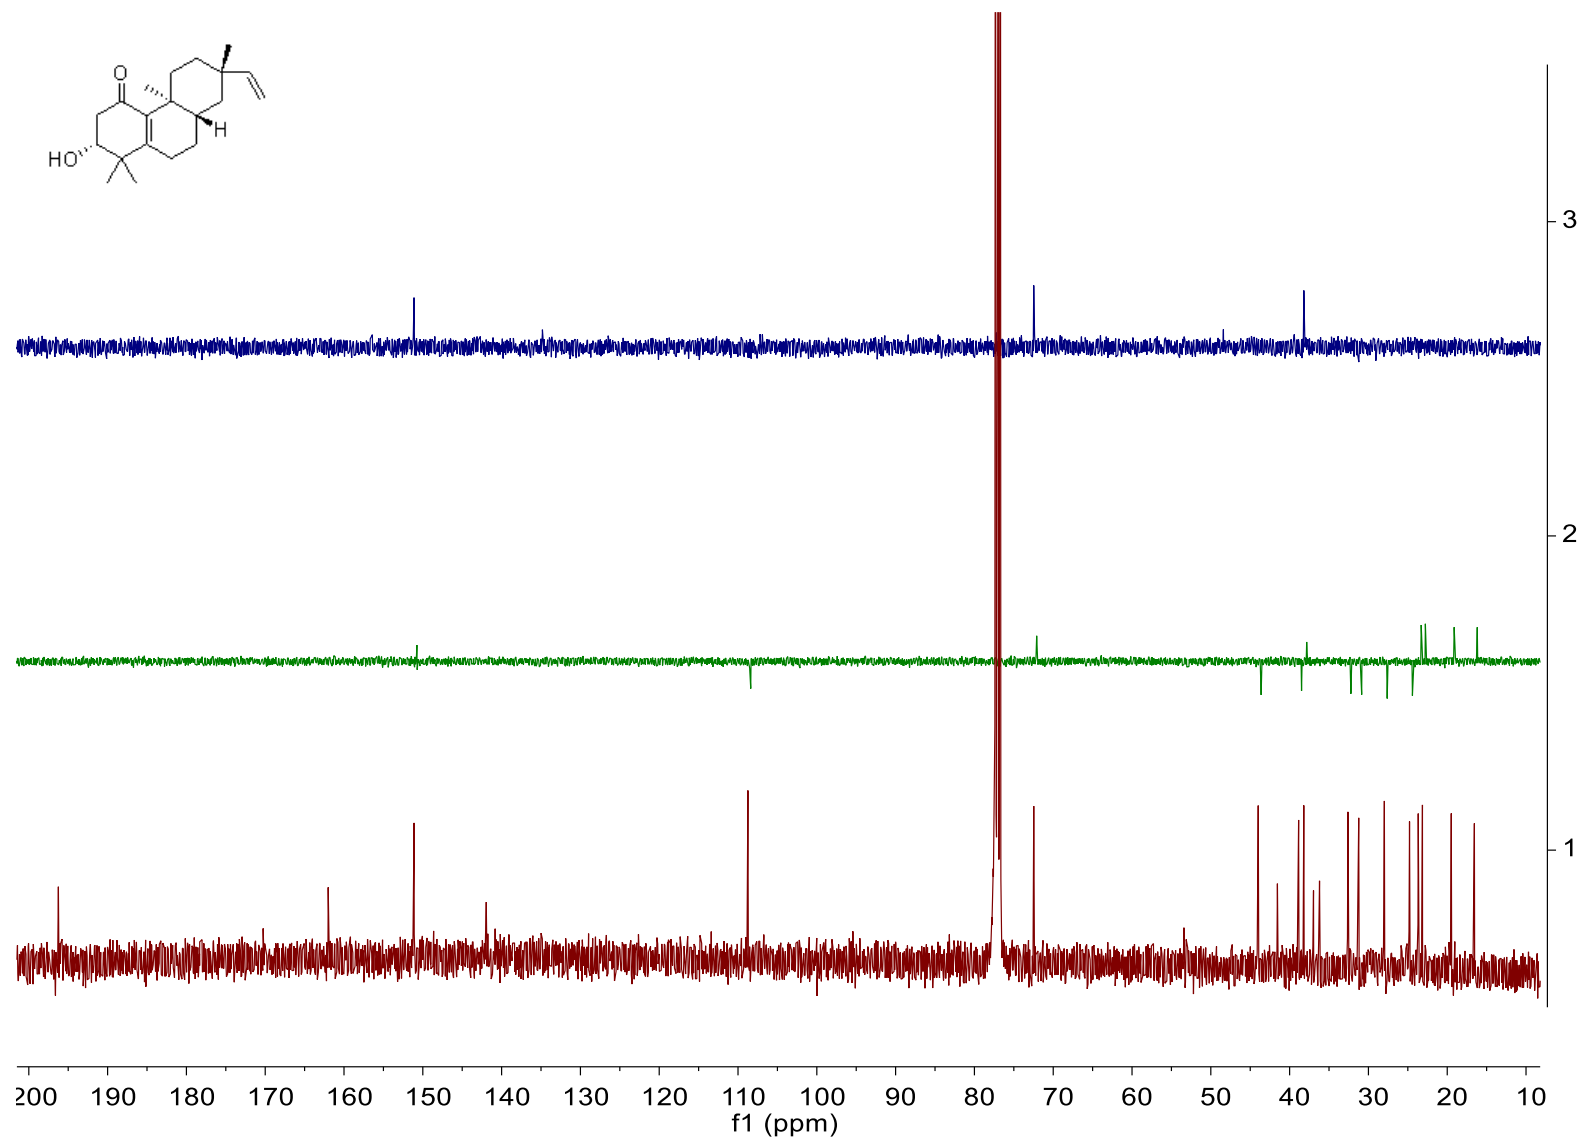

**Figure S36.** The <sup>13</sup>C NMR Spectrum of Compound **5** in CDCl<sub>3</sub>

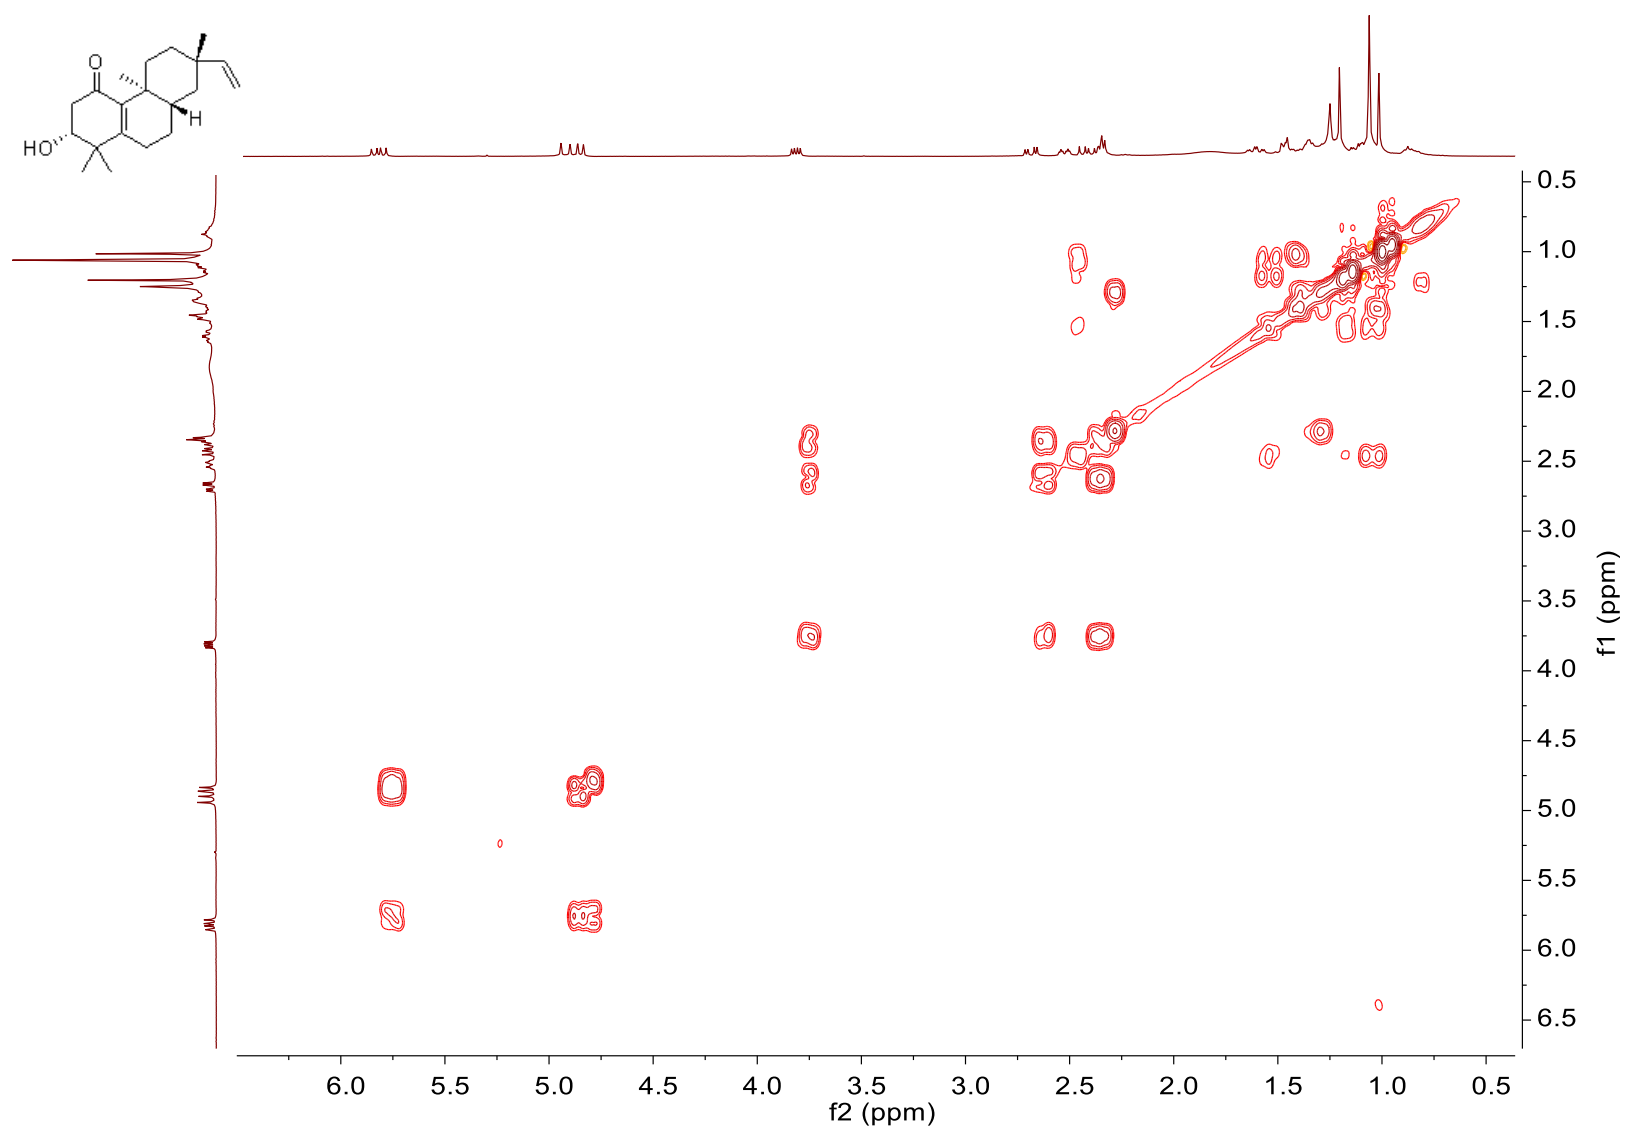

**Figure S37.** The  $^1\text{H}$ - $^1\text{H}$  COSY Spectrum of Compound **5** in  $\text{CDCl}_3$

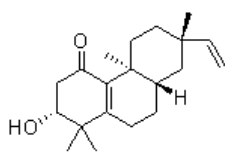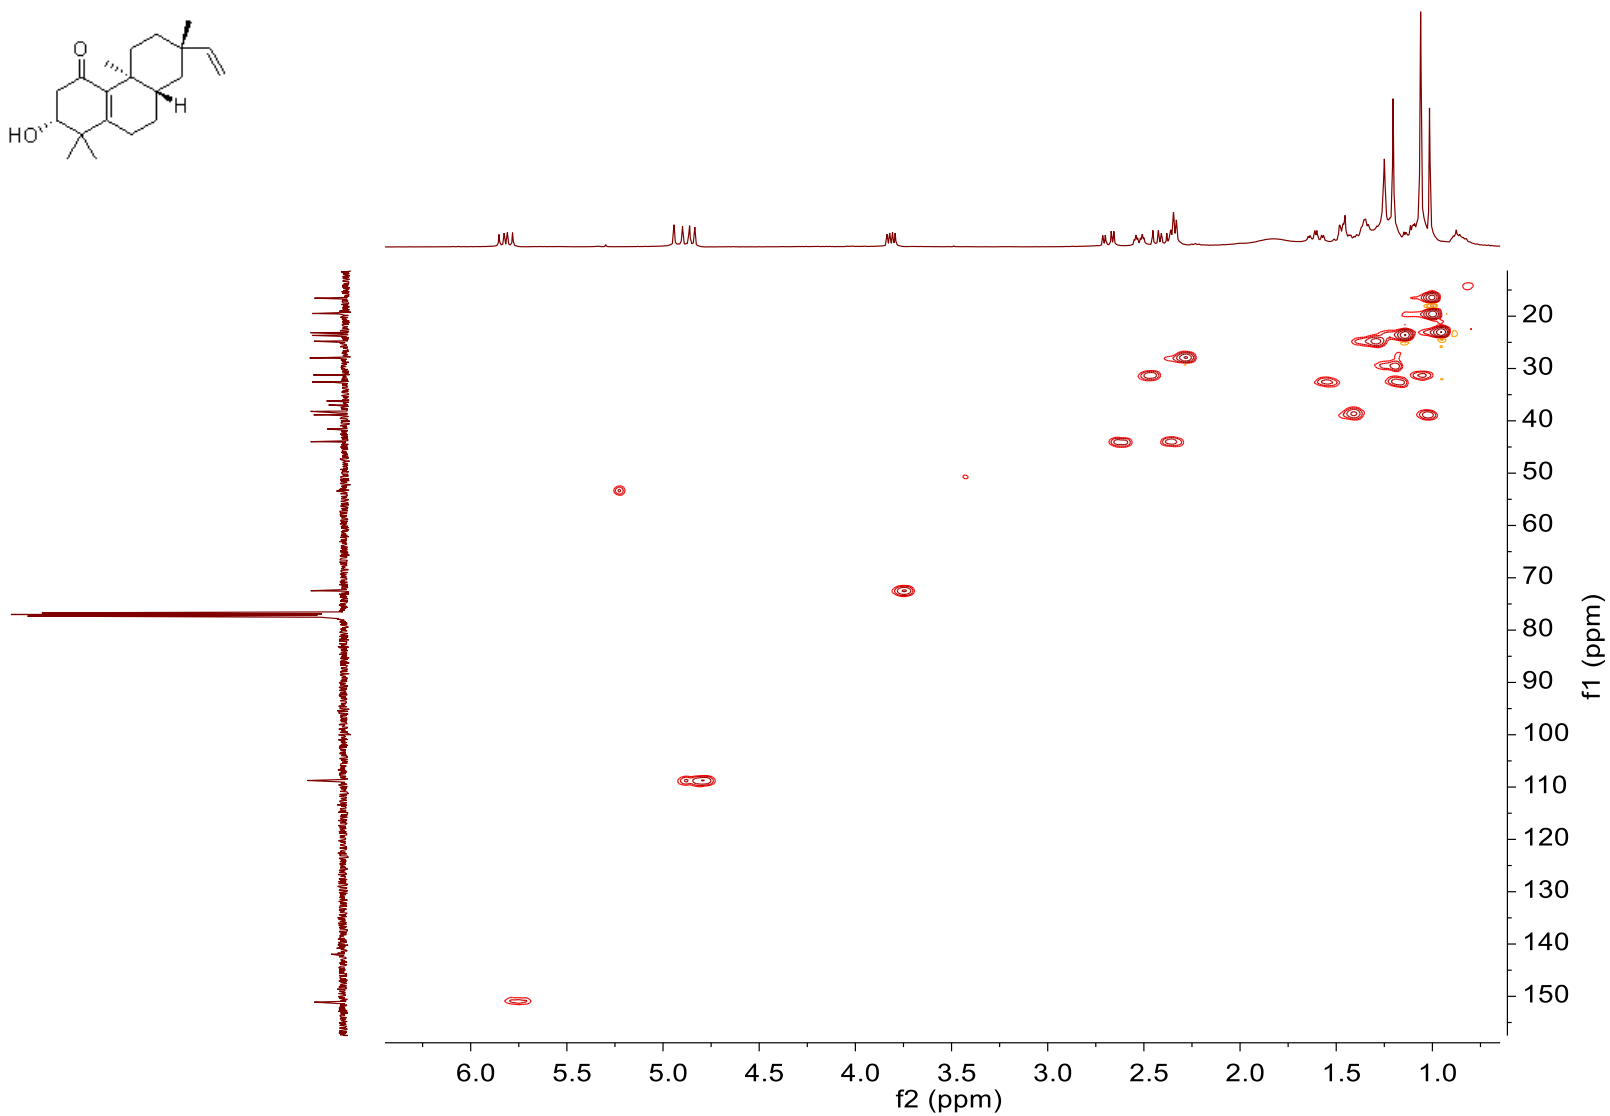

**Figure S38.** The HSQC Spectrum of Compound **5** in  $\text{CDCl}_3$

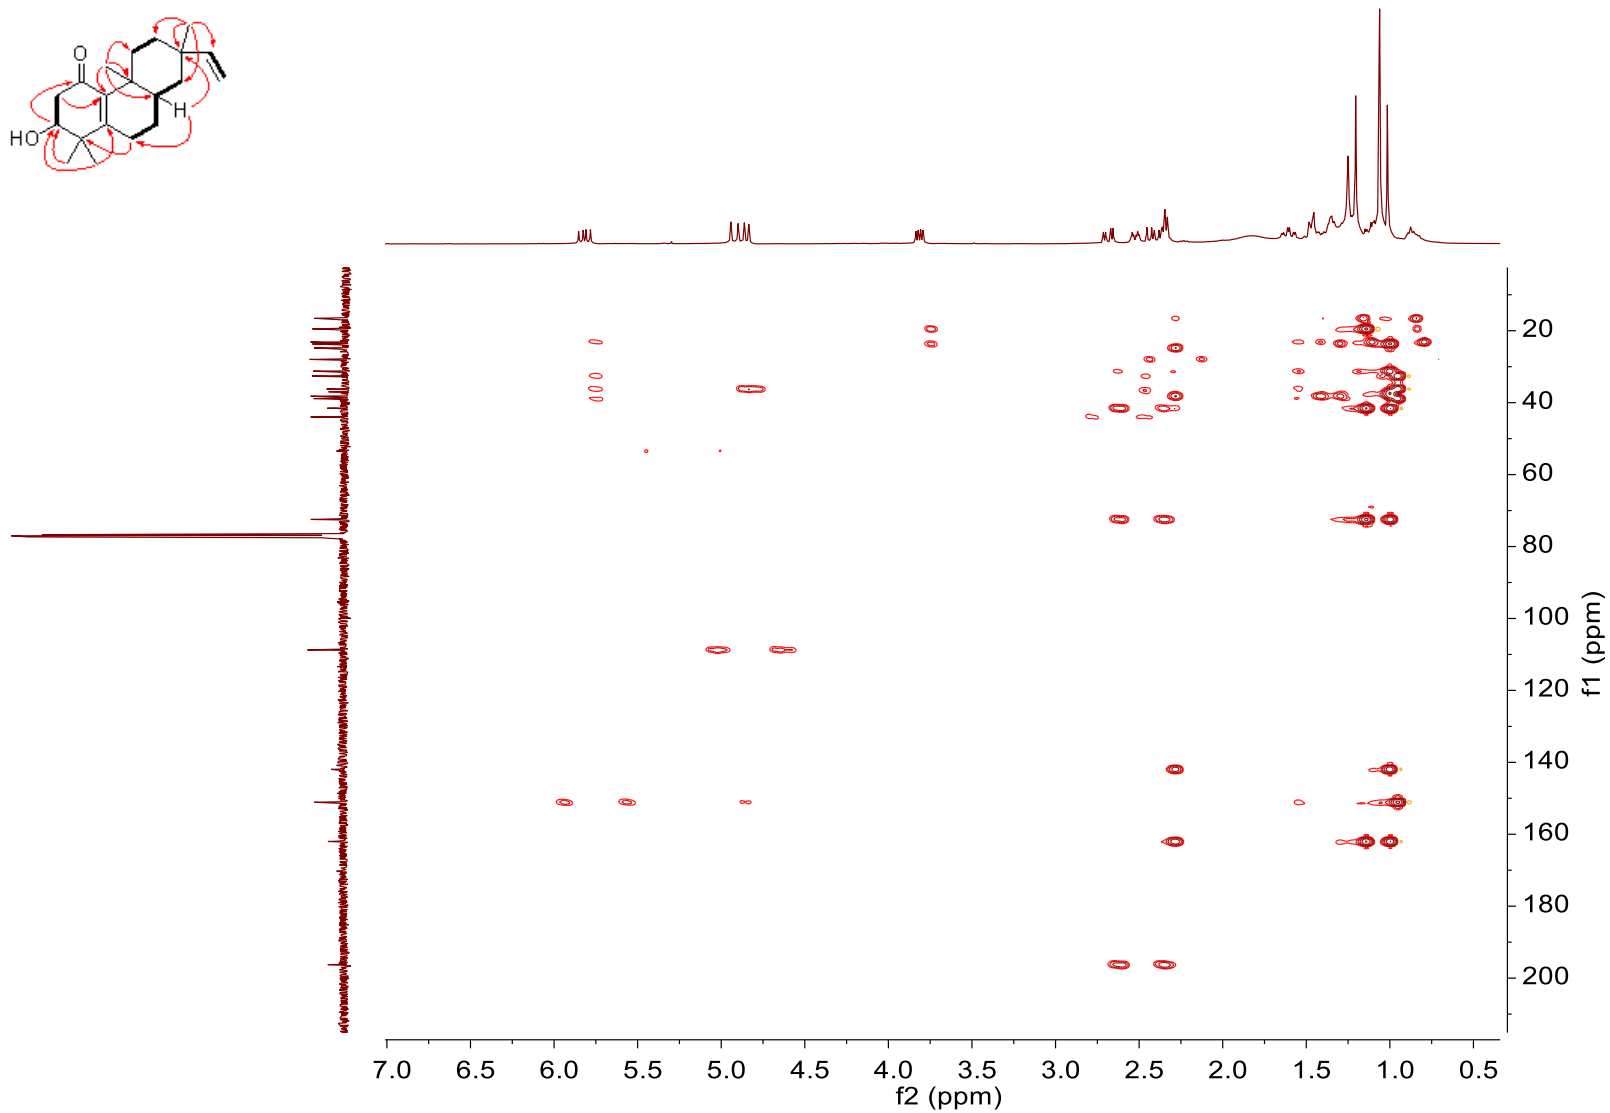

**Figure S39.** The HMBC Spectrum of Compound **5** in  $\text{CDCl}_3$



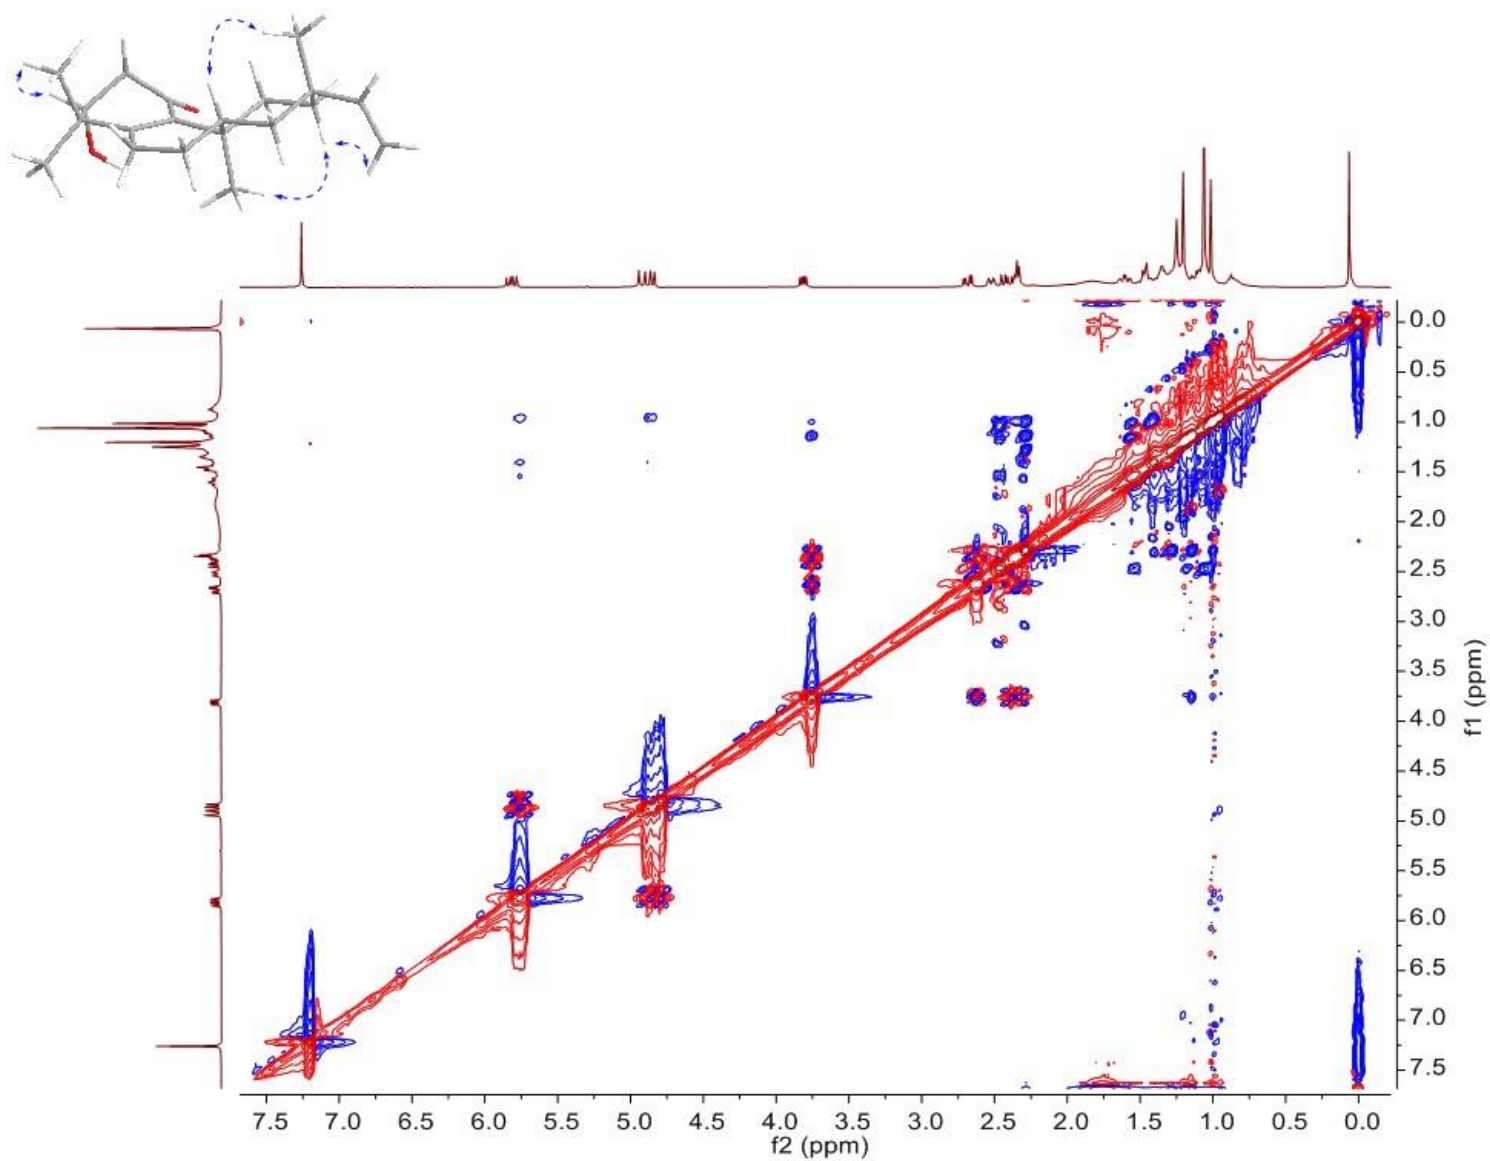

**Figure S40.** The NOESY Spectrum of Compound **5** in CDCl<sub>3</sub>

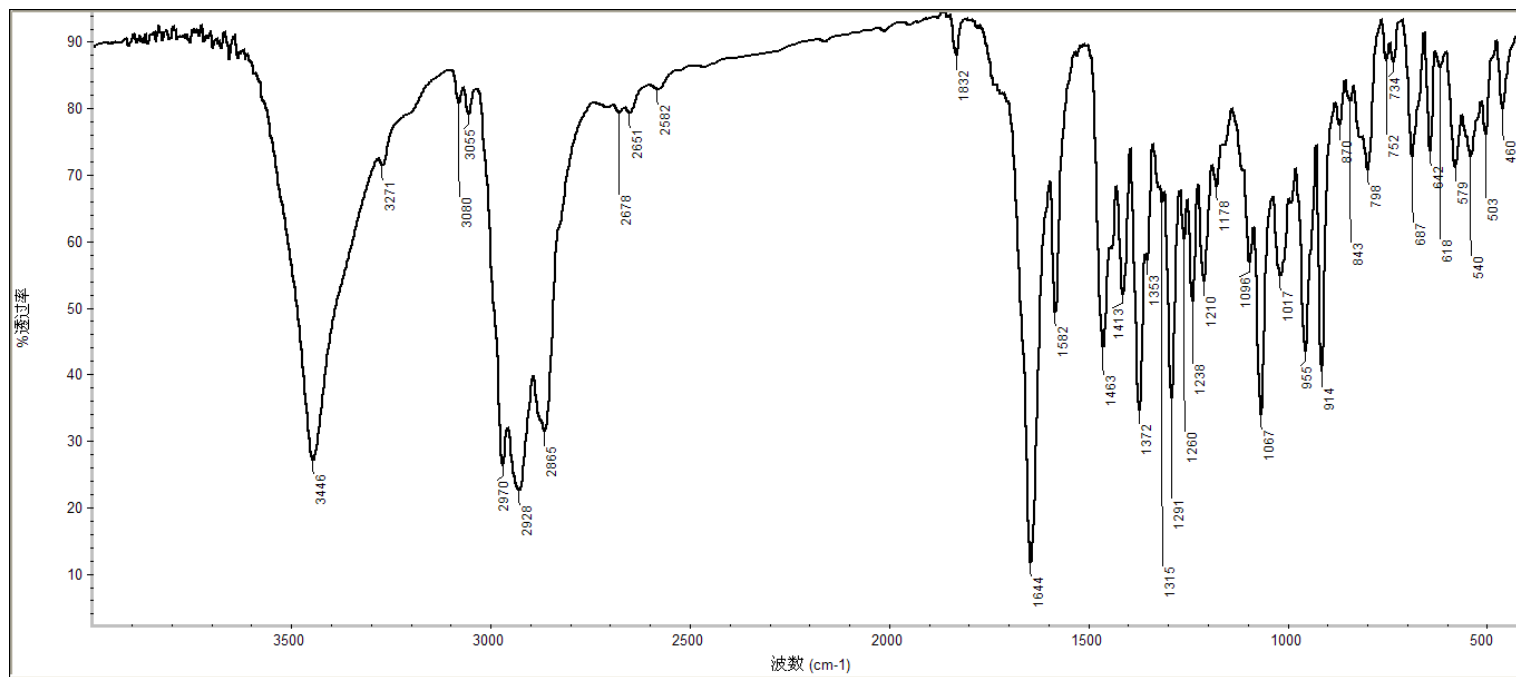

**Figure S41.** The IR Spectra of Compound **6**

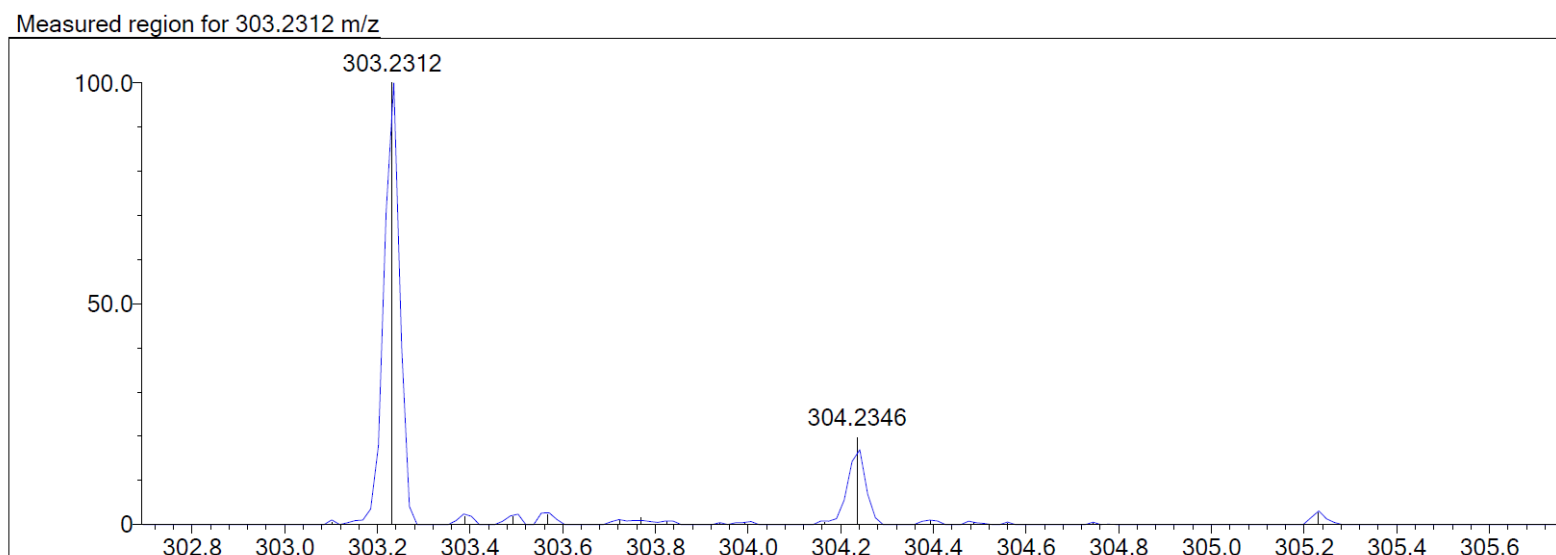

SPECTRUM -

simulation :

| m/z      | Theo. Mass | Delta (ppm) | RDB equiv. | Composition                                    |
|----------|------------|-------------|------------|------------------------------------------------|
| 303.2312 | 303.2319   | -2.31       | 6.0        | C <sub>20</sub> H <sub>31</sub> O <sub>2</sub> |

**Figure S42.** The HRESIMS Spectroscopic Data of Compound **6**

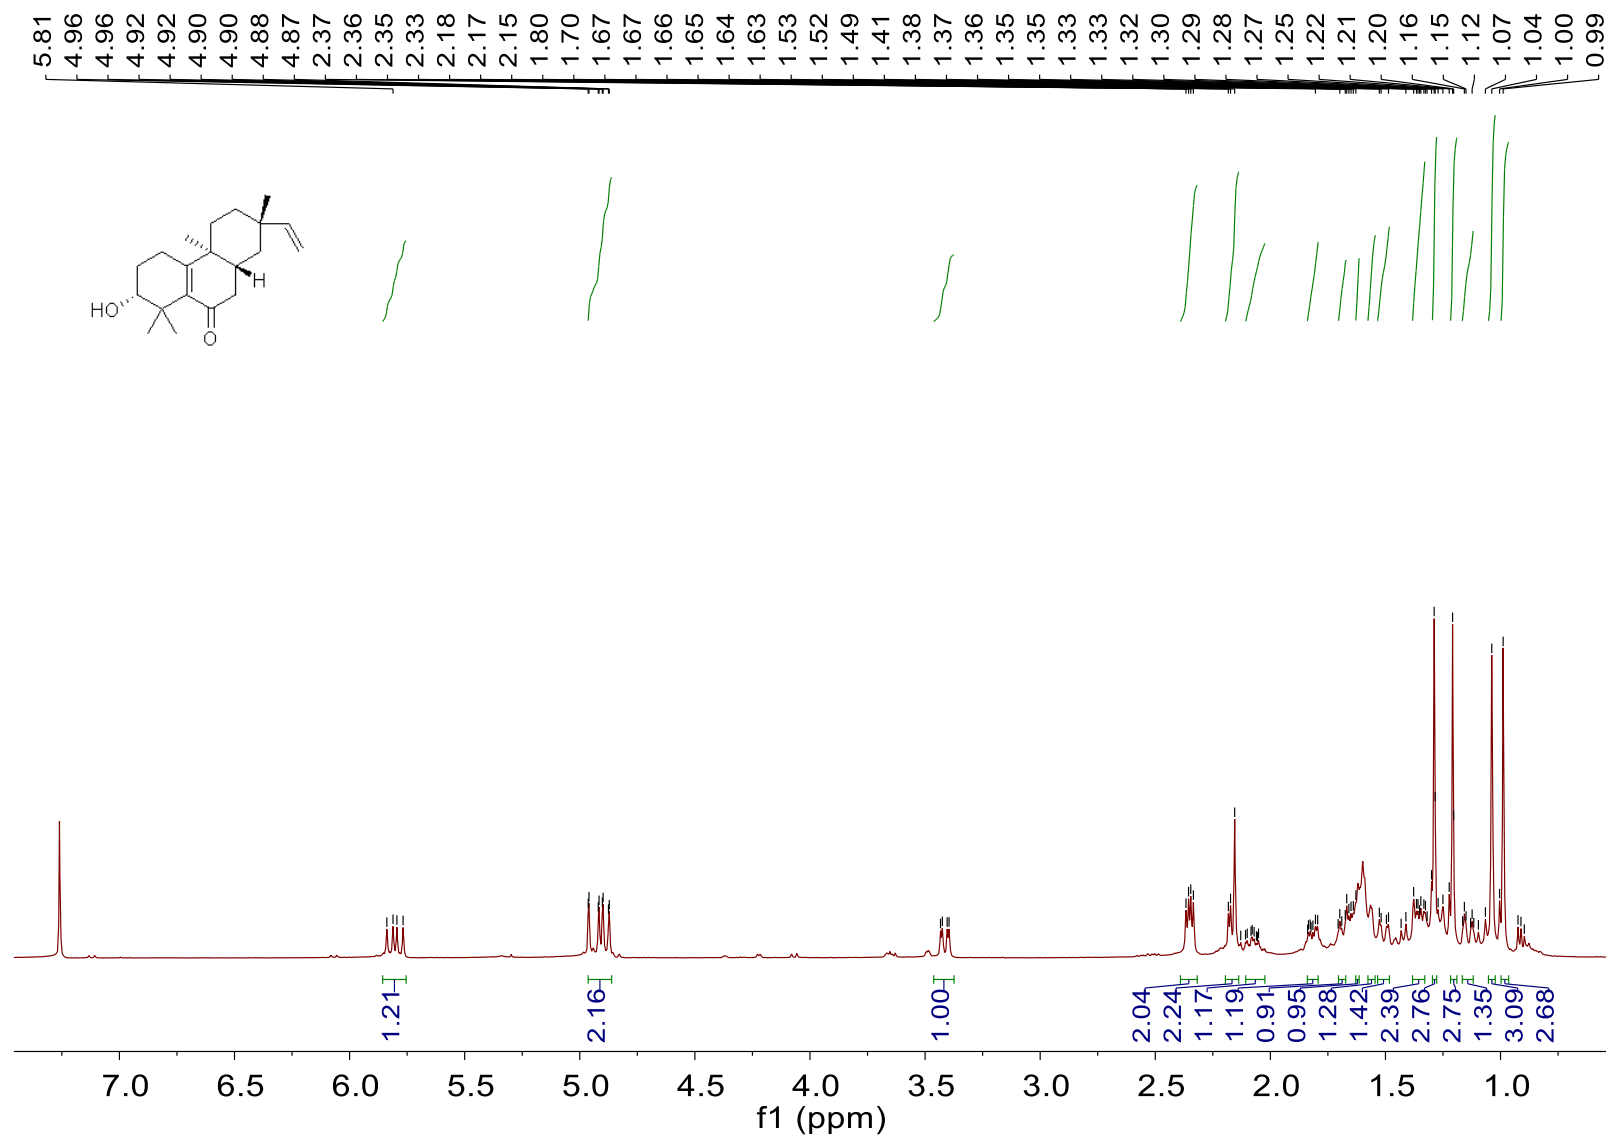

**Figure S43.** The <sup>1</sup>H NMR Spectrum of Compound **6** in CDCl<sub>3</sub>

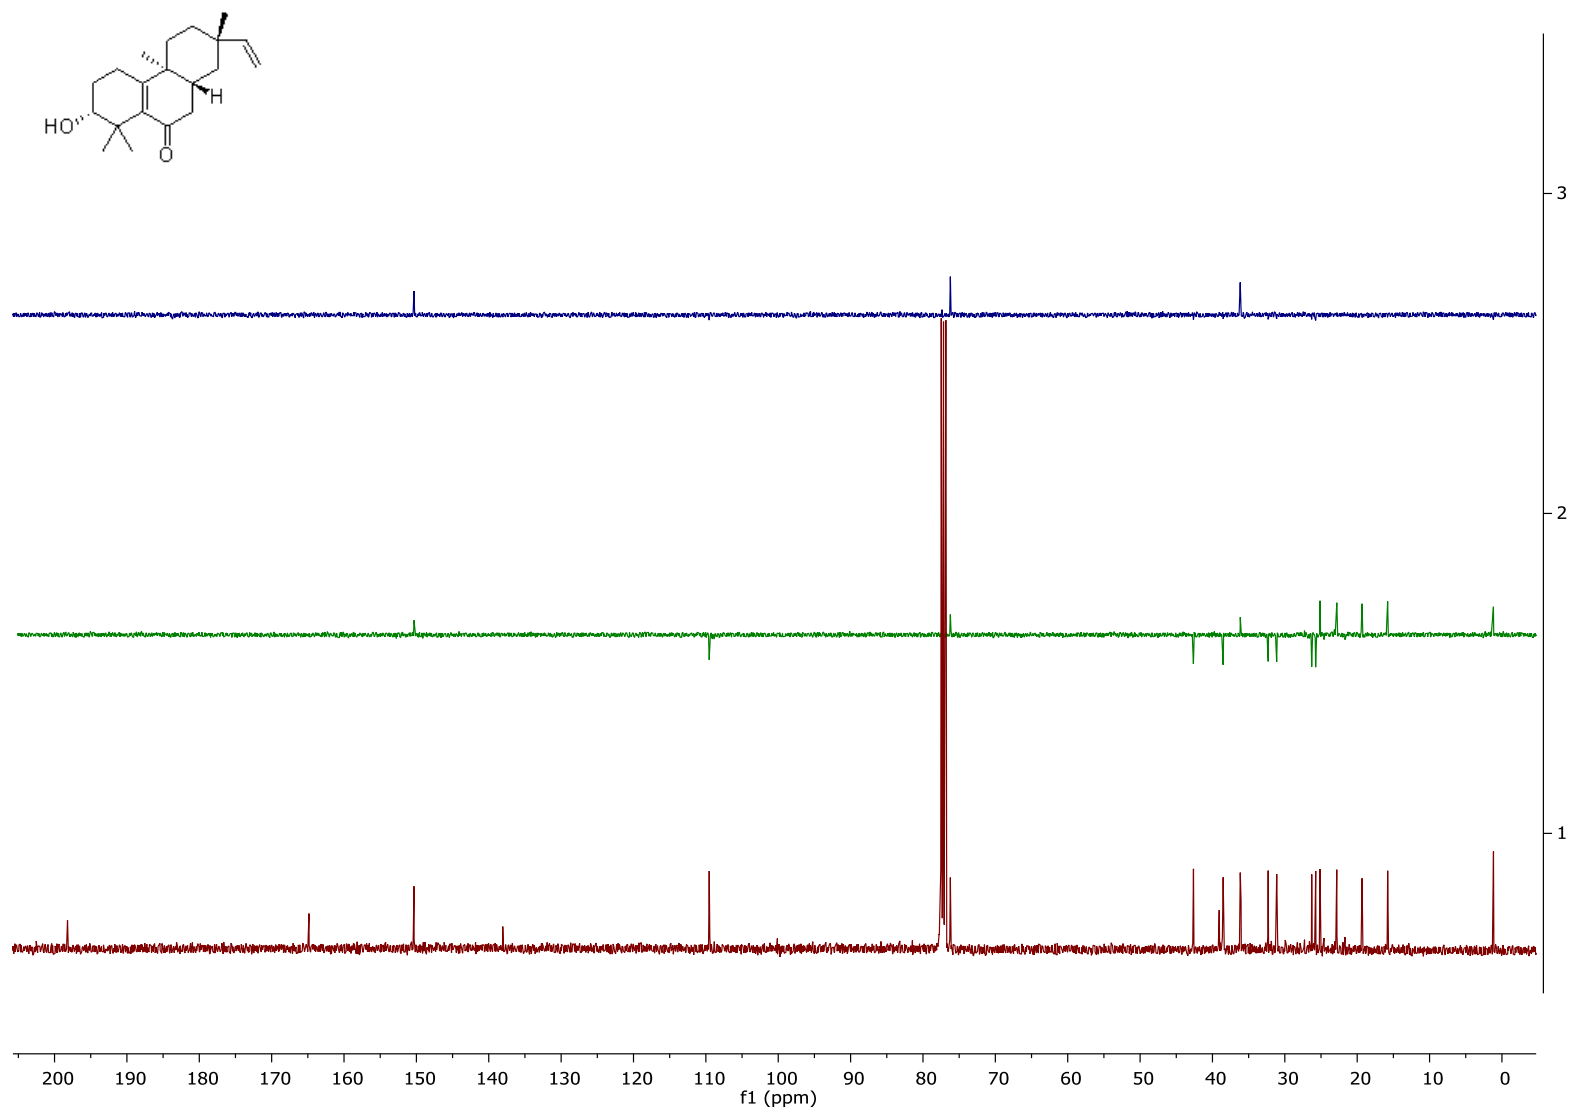

**Figure S44.** The  $^{13}\text{C}$  NMR Spectrum of Compound **6** in  $\text{CDCl}_3$

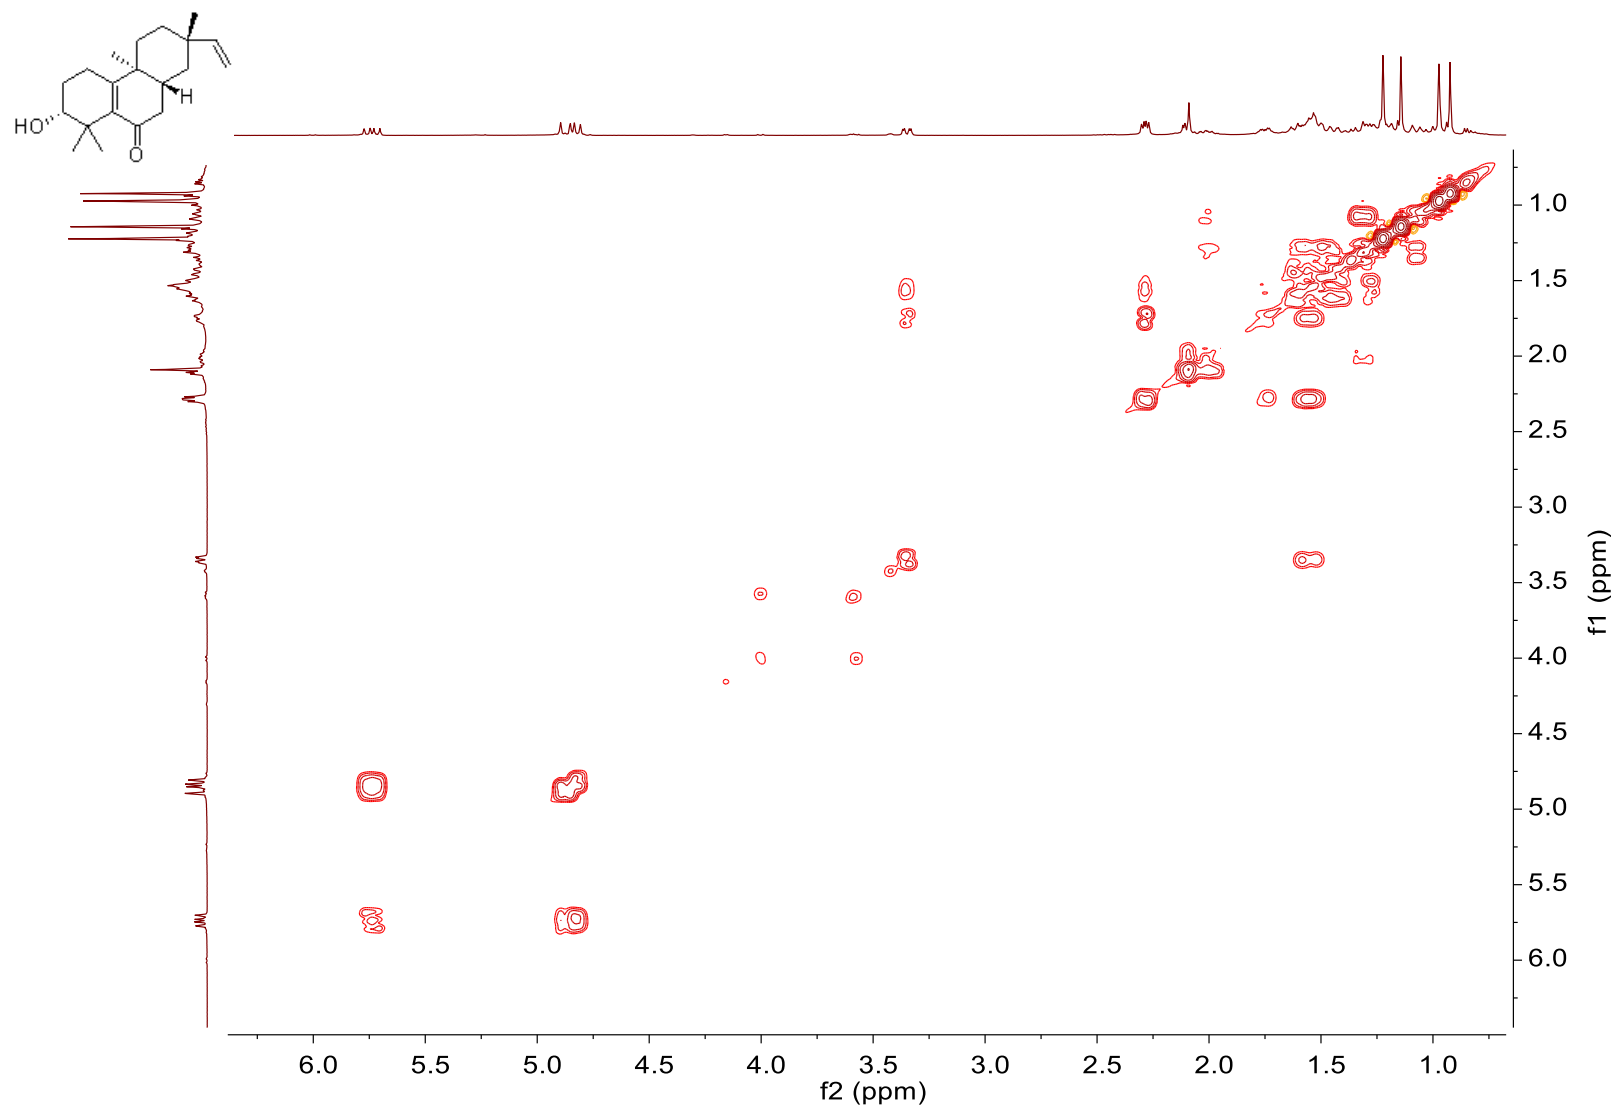

**Figure S45.** The  $^1\text{H}$ - $^1\text{H}$  COSY Spectrum of Compound **6** in  $\text{CDCl}_3$

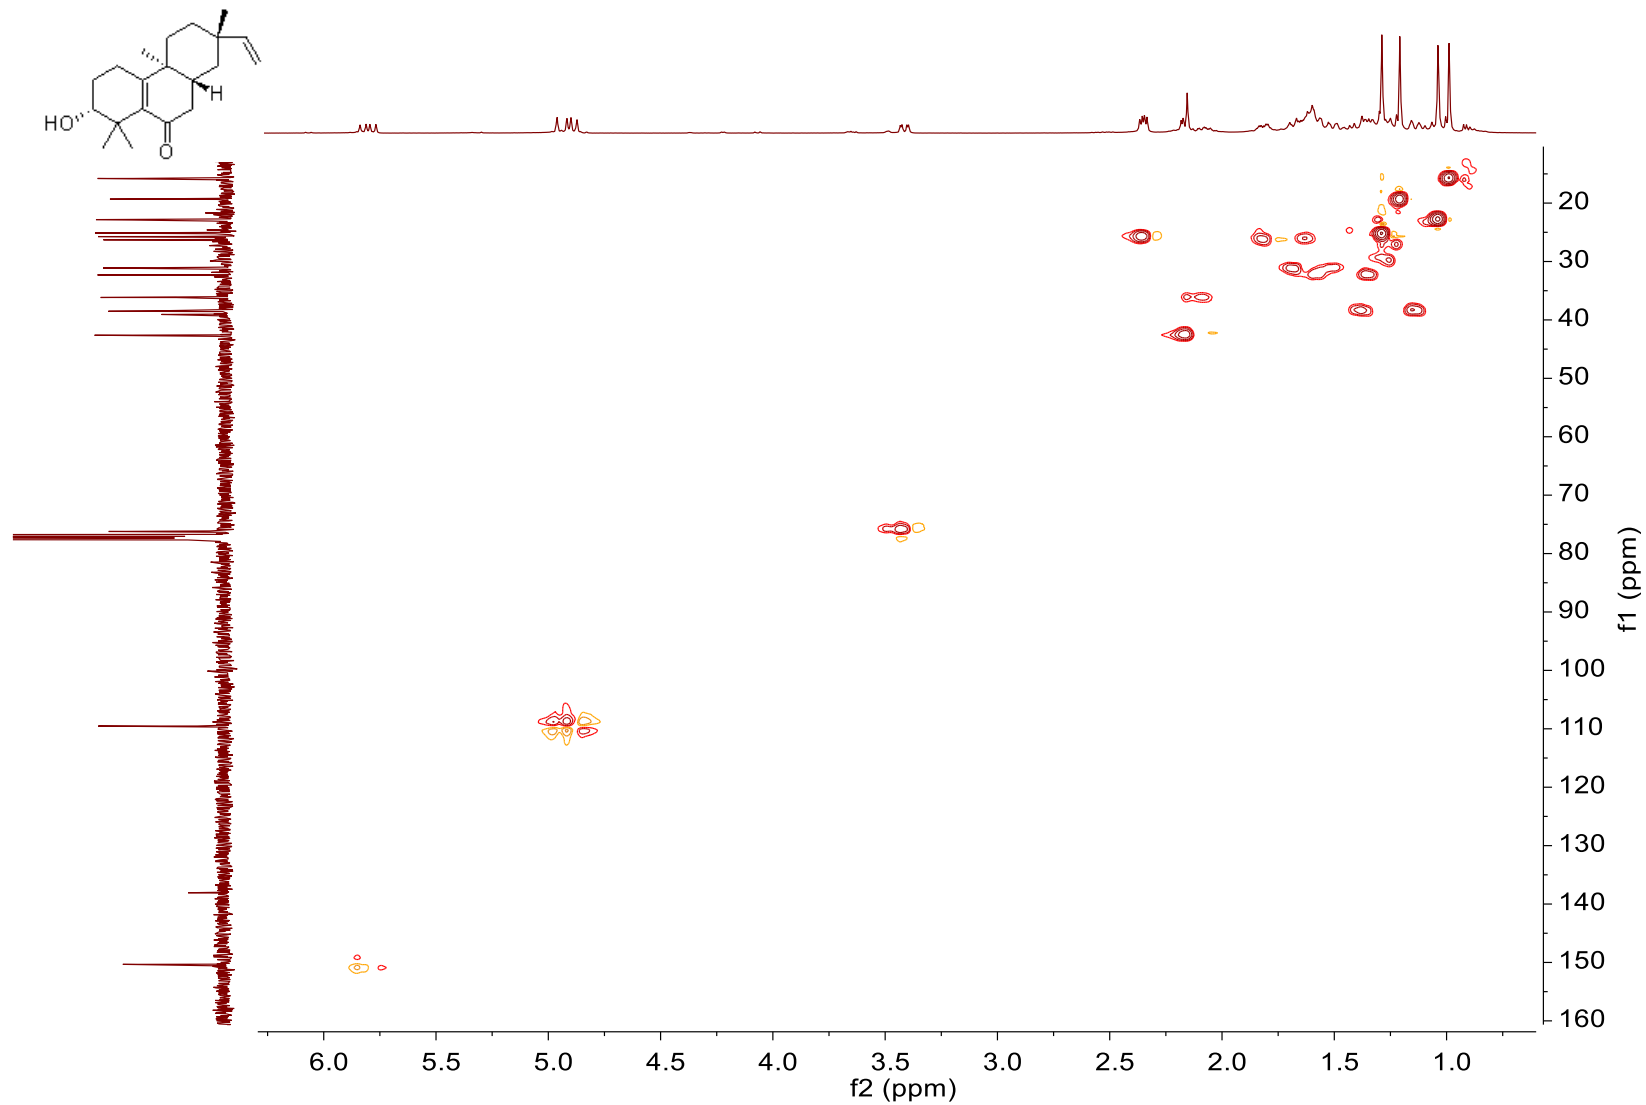

**Figure S46.** The HSQC Spectrum of Compound **6** in CDCl<sub>3</sub>

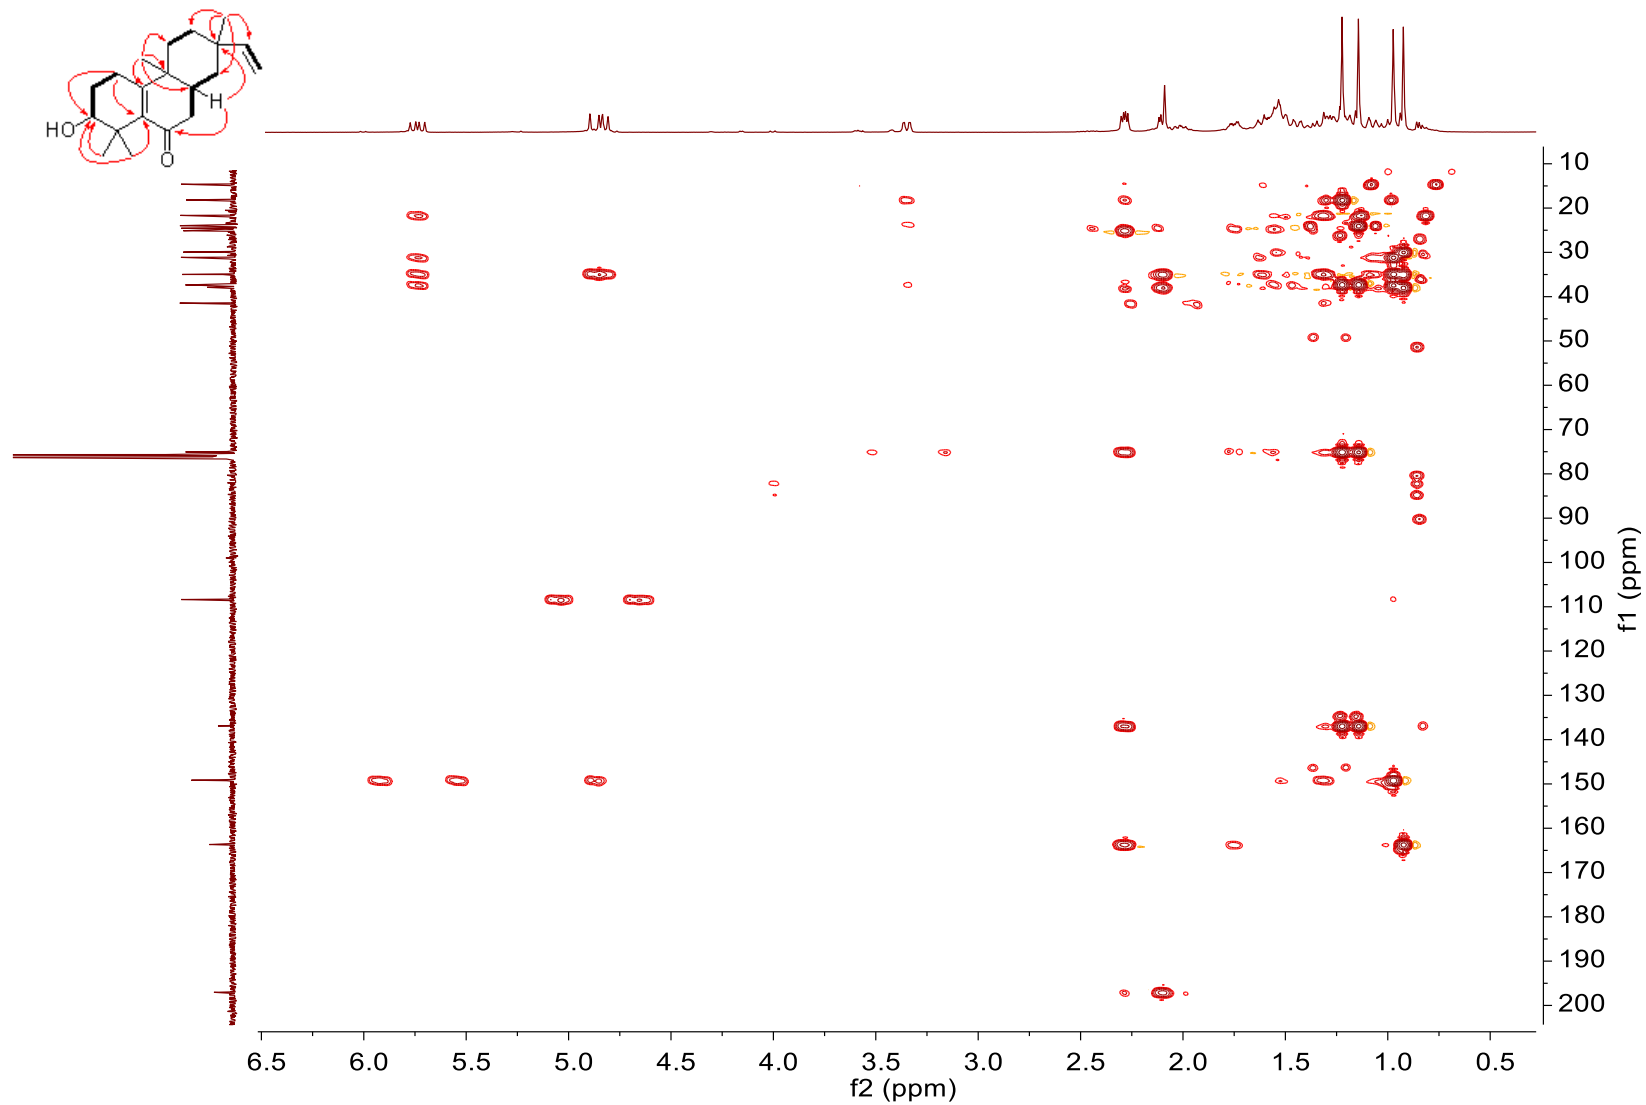

**Figure S47.** The HMBC Spectrum of Compound **6** in  $\text{CDCl}_3$



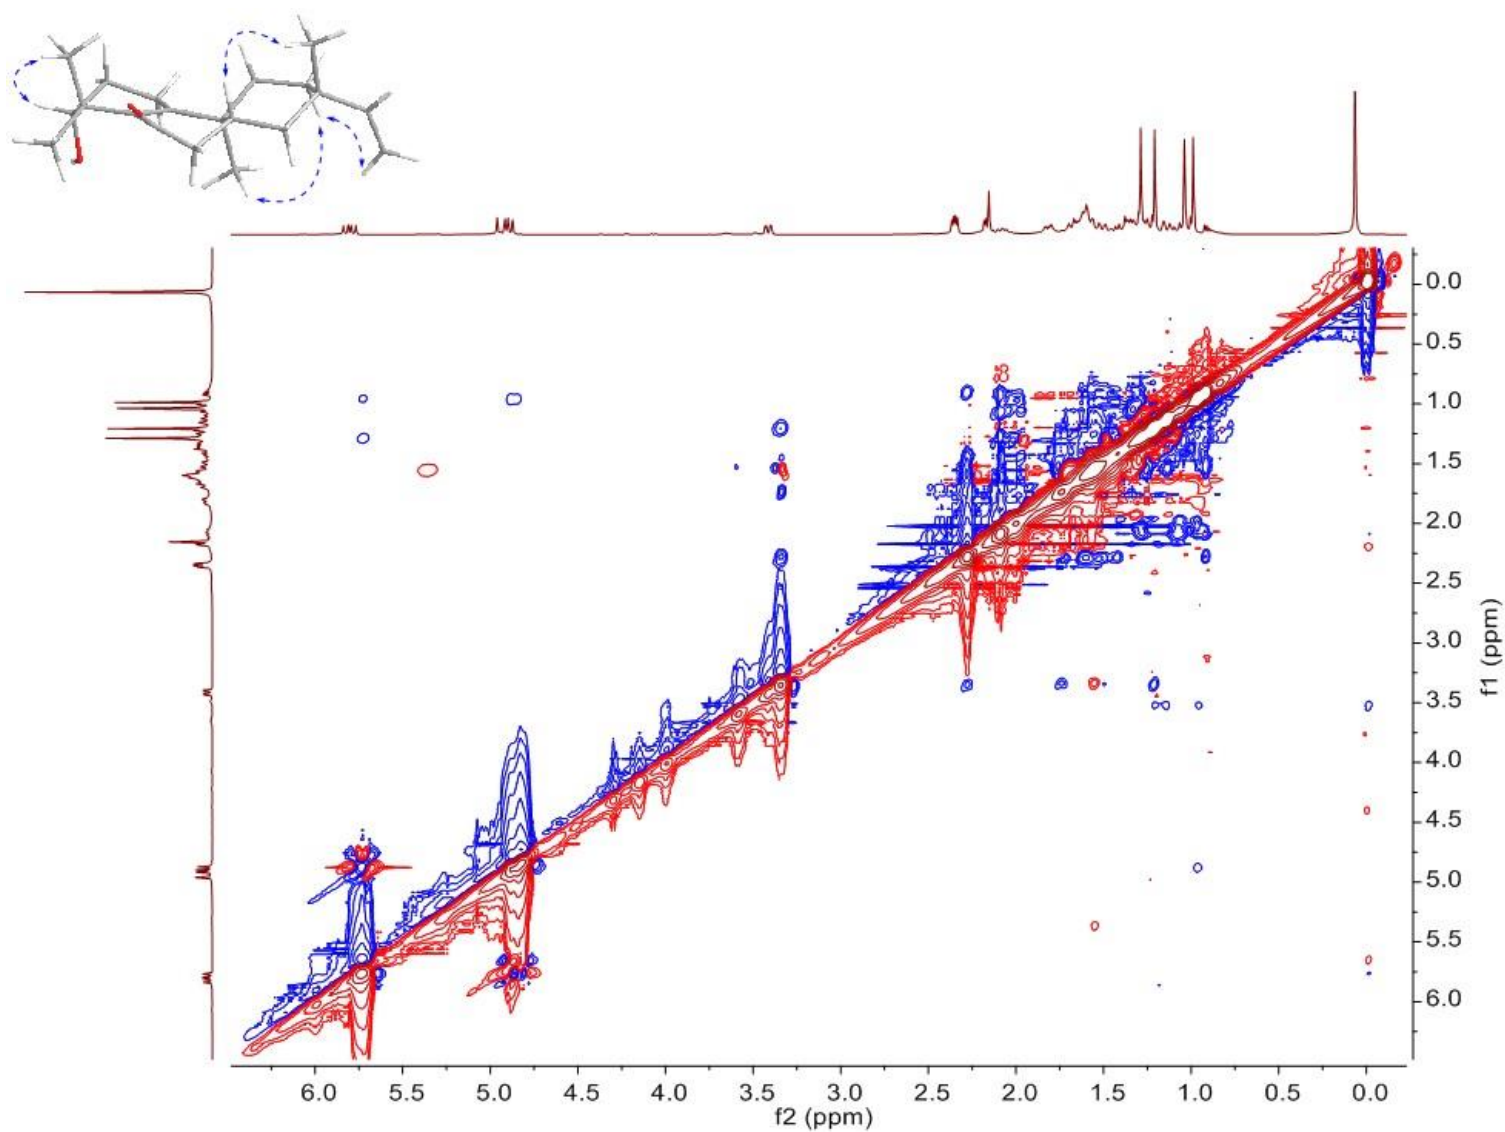

**Figure S48.** The NOESY Spectrum of Compound **6** in CDCl<sub>3</sub>

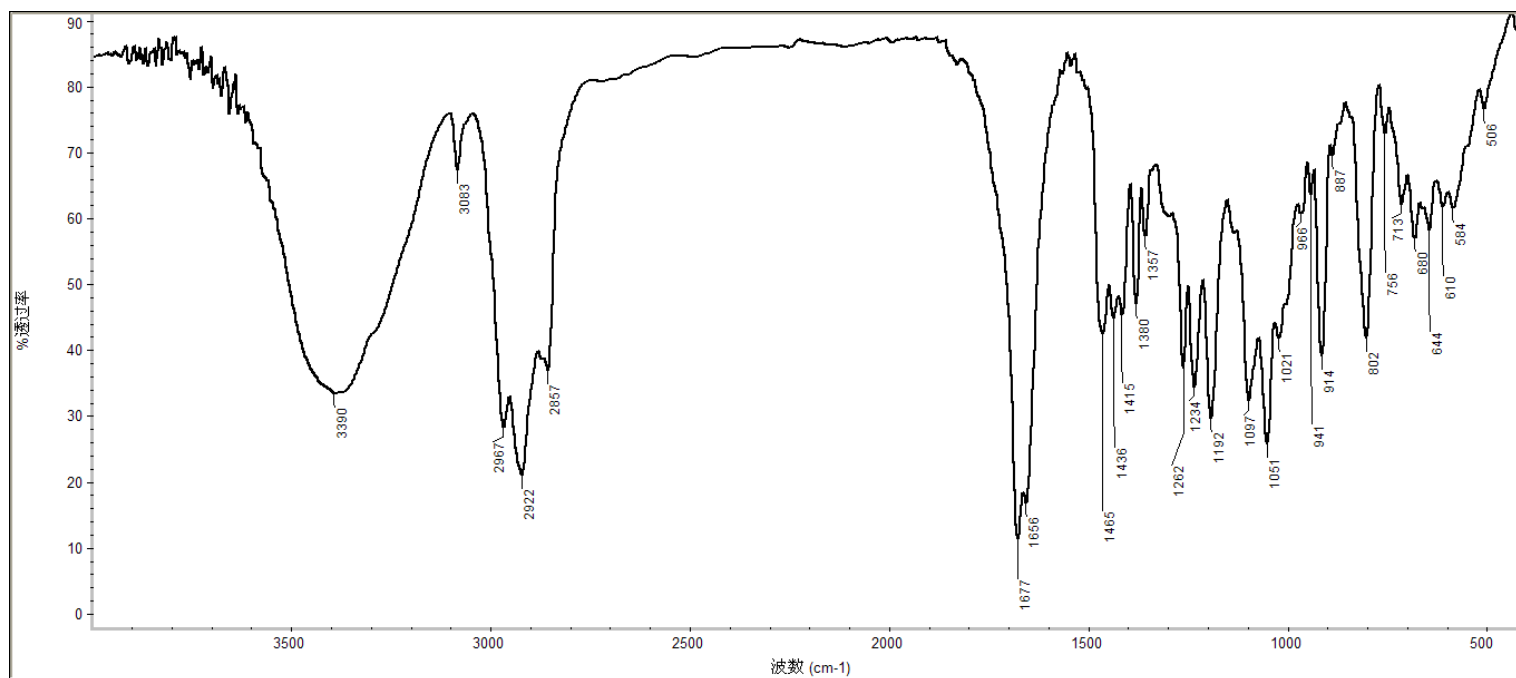

**Figure S49.** The IR Spectra of Compound **7**

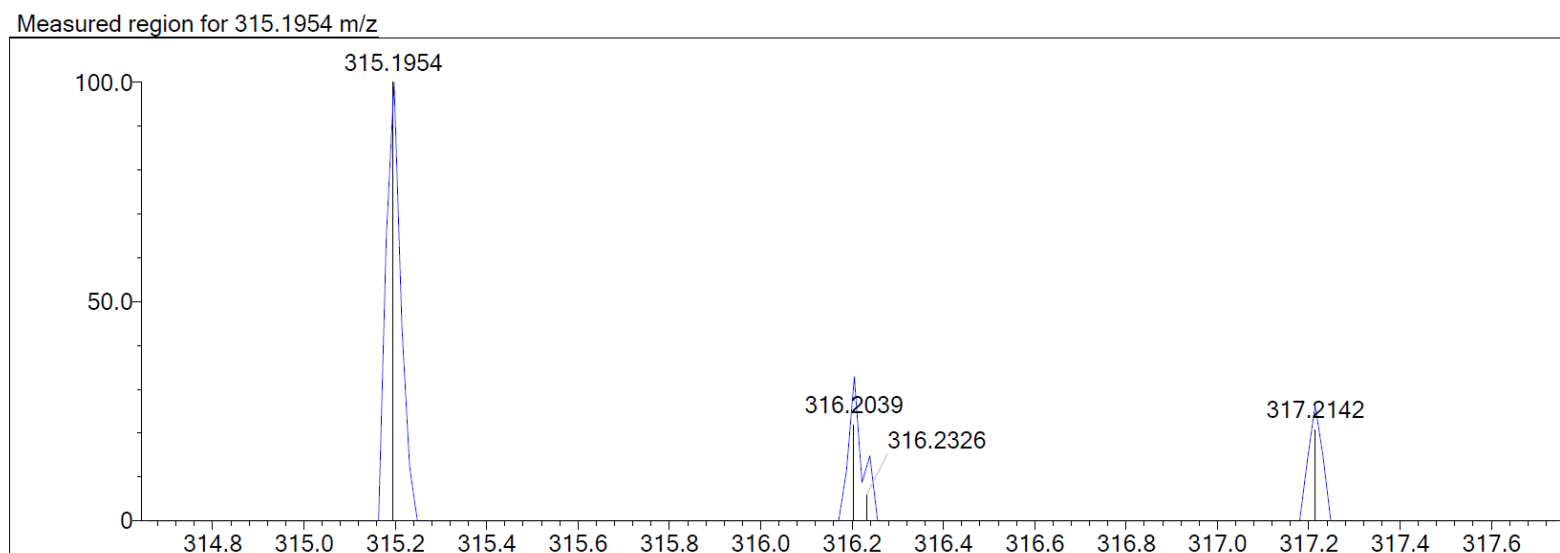


---

SPECTRUM -

simulation :

---

| m/z      | Theo. Mass | Delta (ppm) | RDB equiv. | Composition                                    |
|----------|------------|-------------|------------|------------------------------------------------|
| 315.1954 | 315.1966   | -3.81       | 7.0        | C <sub>20</sub> H <sub>27</sub> O <sub>3</sub> |

---

**Figure S50.** The HRESIMS Spectroscopic Data of Compound **7**

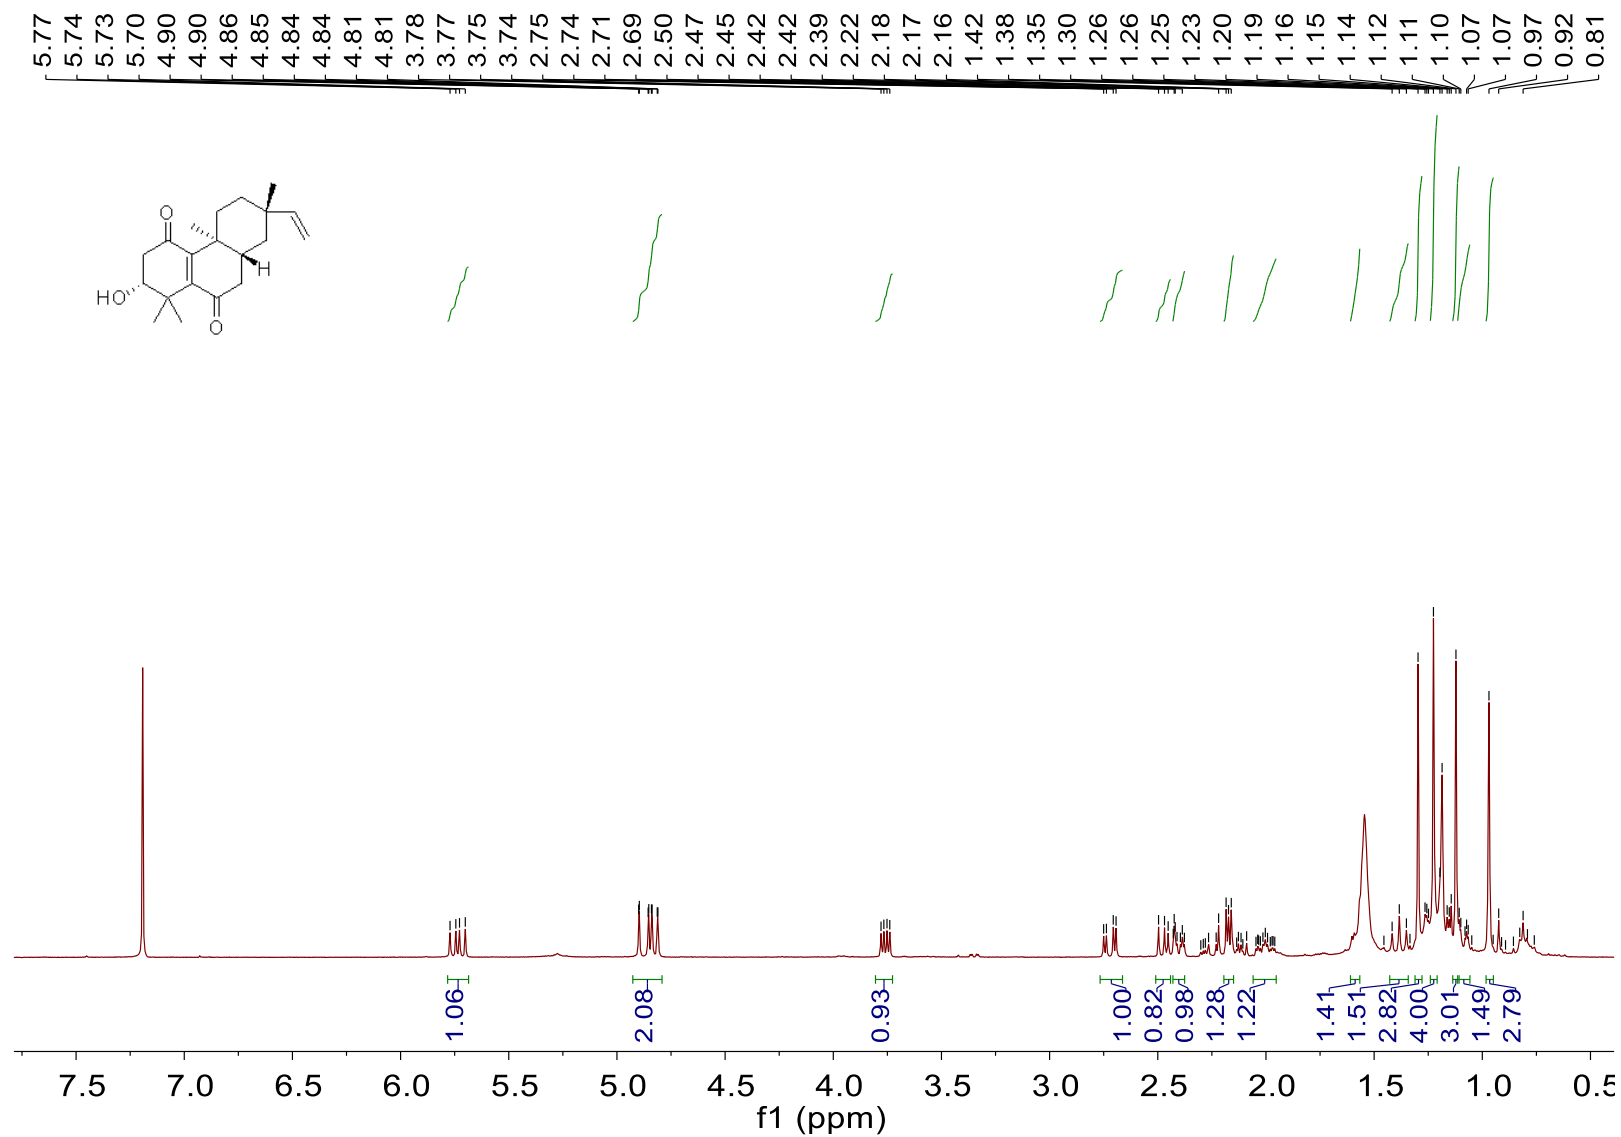

**Figure S51.** The <sup>1</sup>H NMR Spectrum of Compound **7** in CDCl<sub>3</sub>

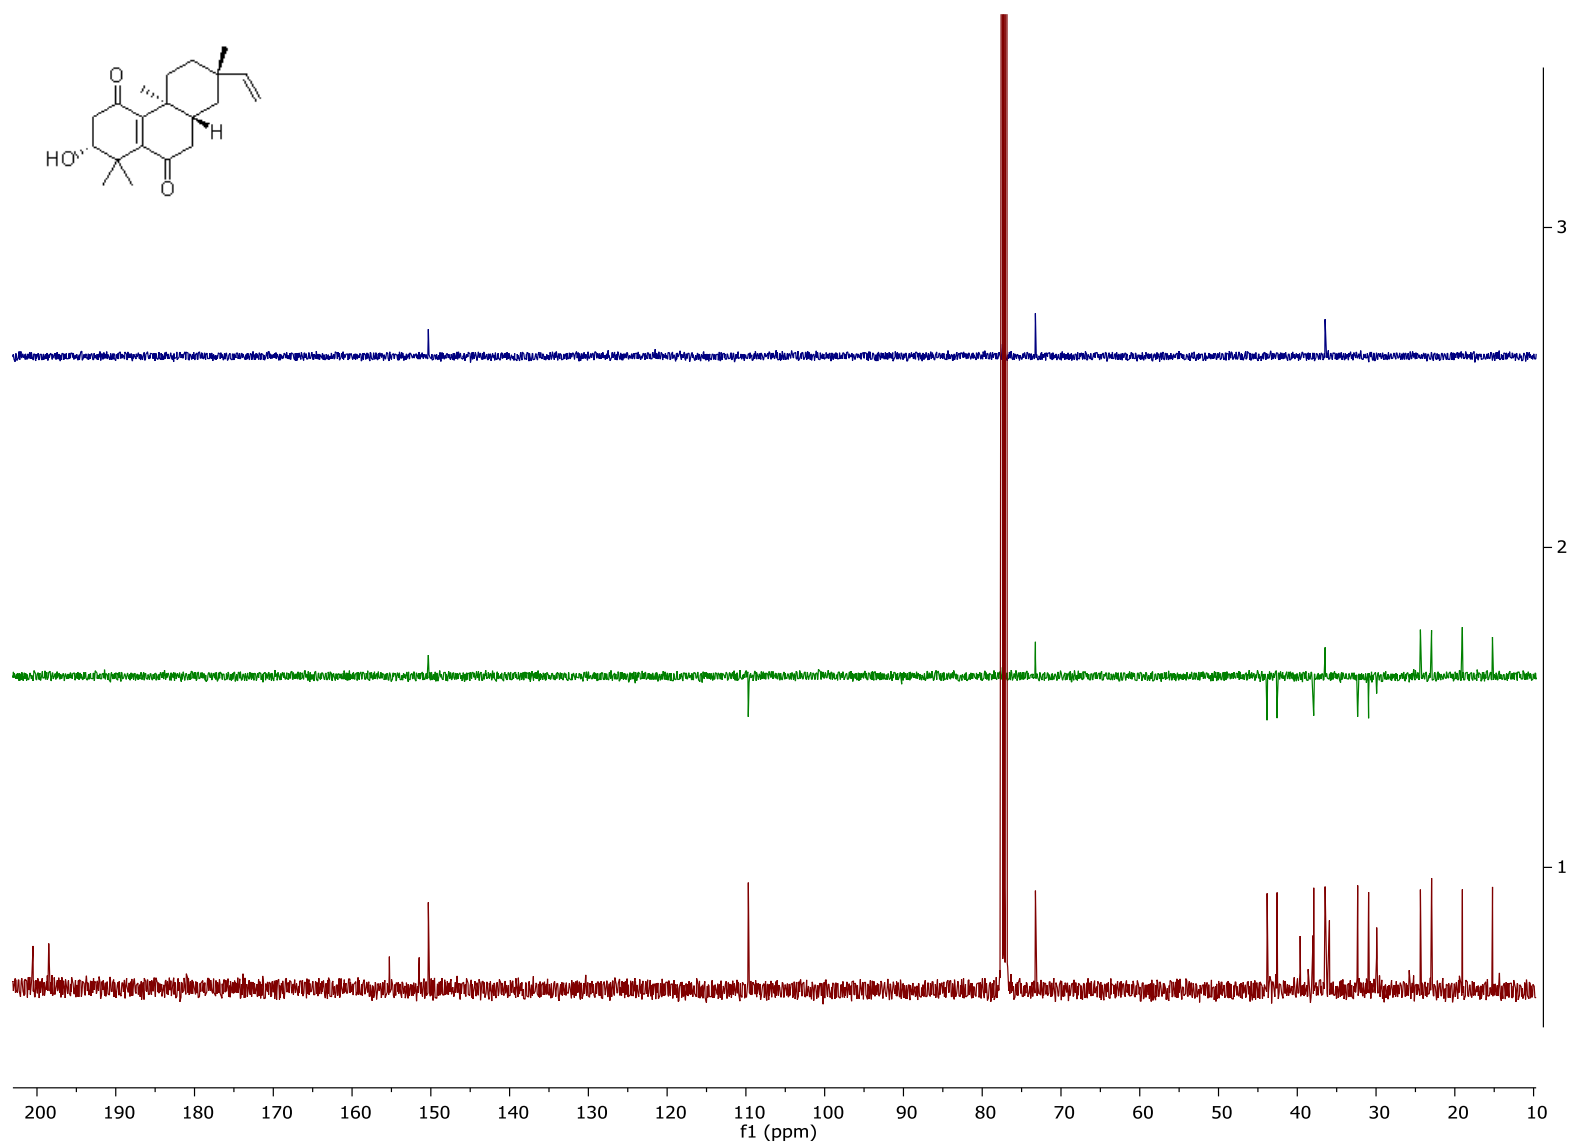

**Figure S52.** The  $^{13}\text{C}$  NMR Spectrum of Compound **7** in  $\text{CDCl}_3$

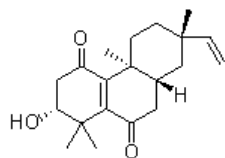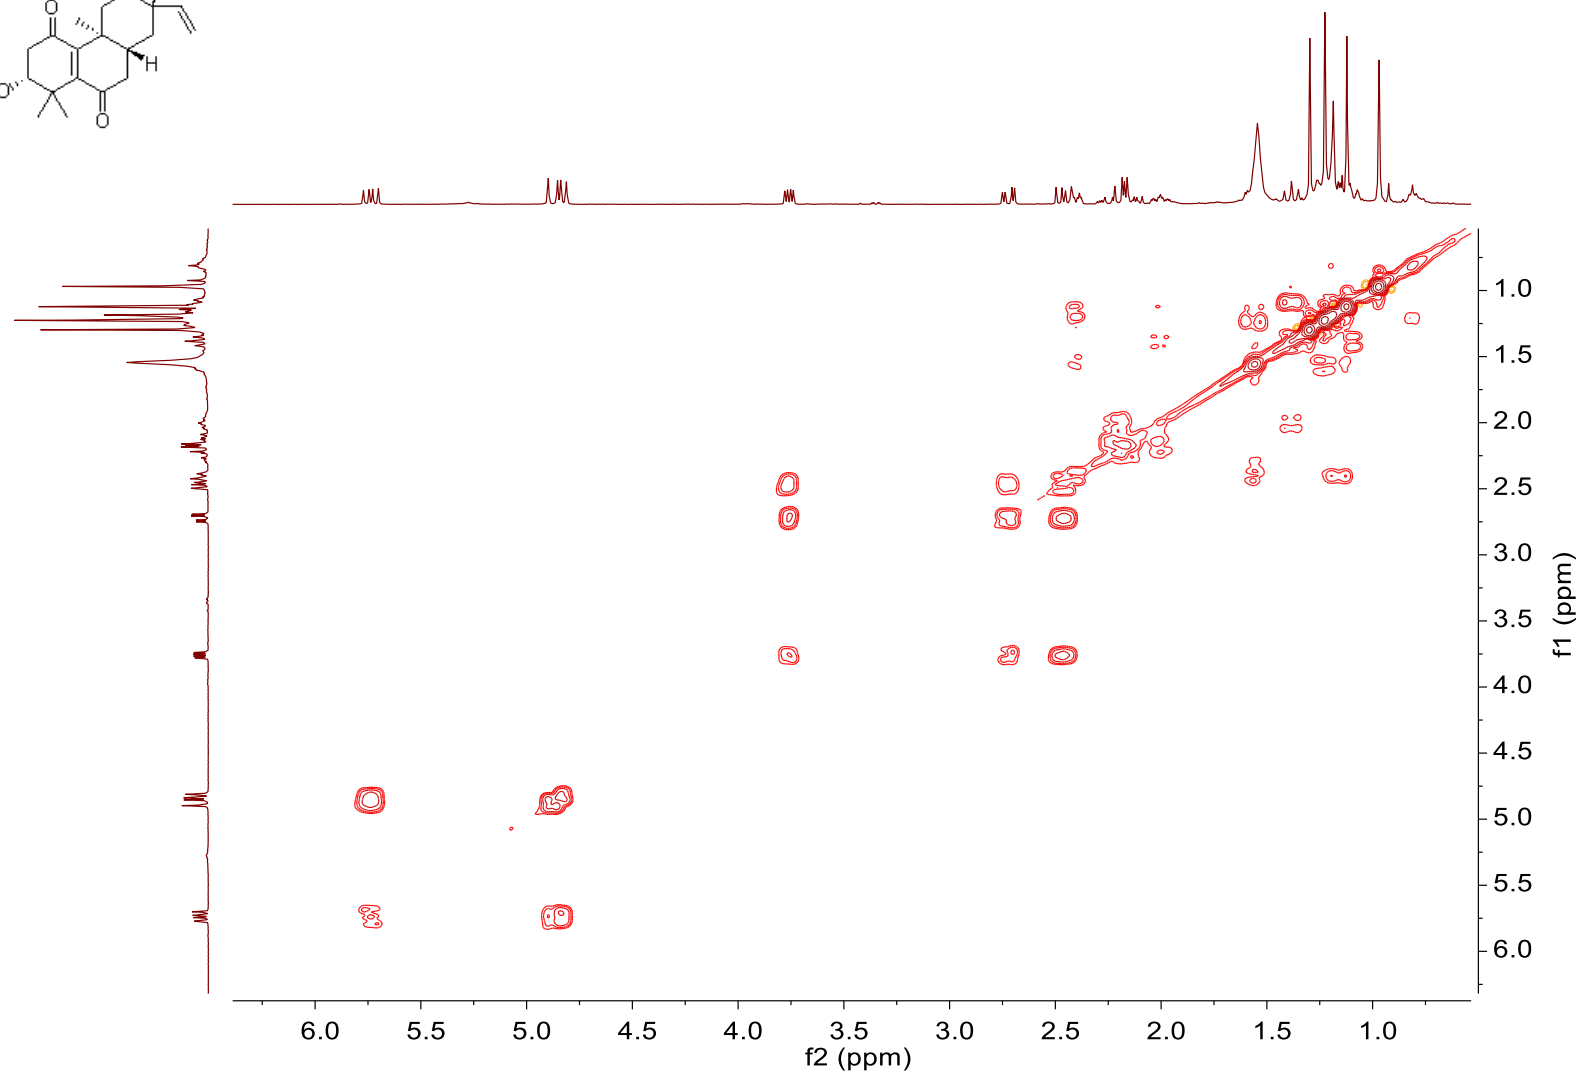

**Figure S53.** The  $^1\text{H}$ - $^1\text{H}$  COSY Spectrum of Compound 7 in  $\text{CDCl}_3$

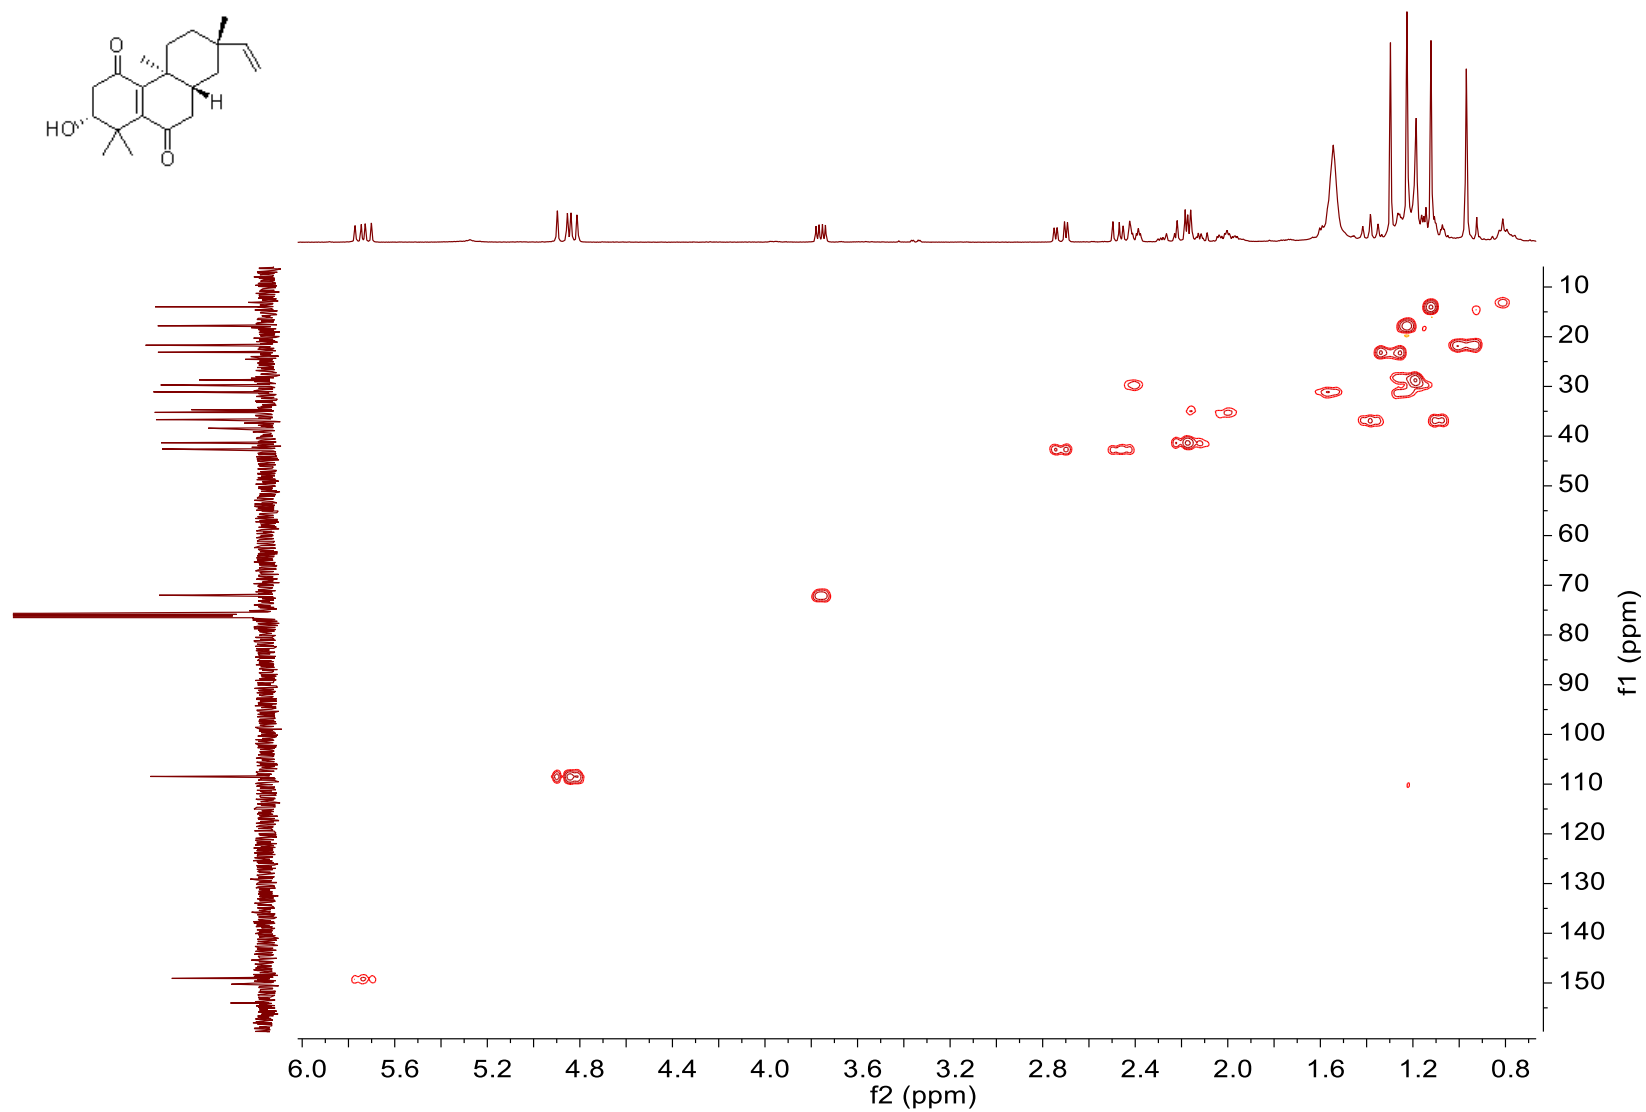

**Figure S54.** The HSQC Spectrum of Compound **7** in CDCl<sub>3</sub>

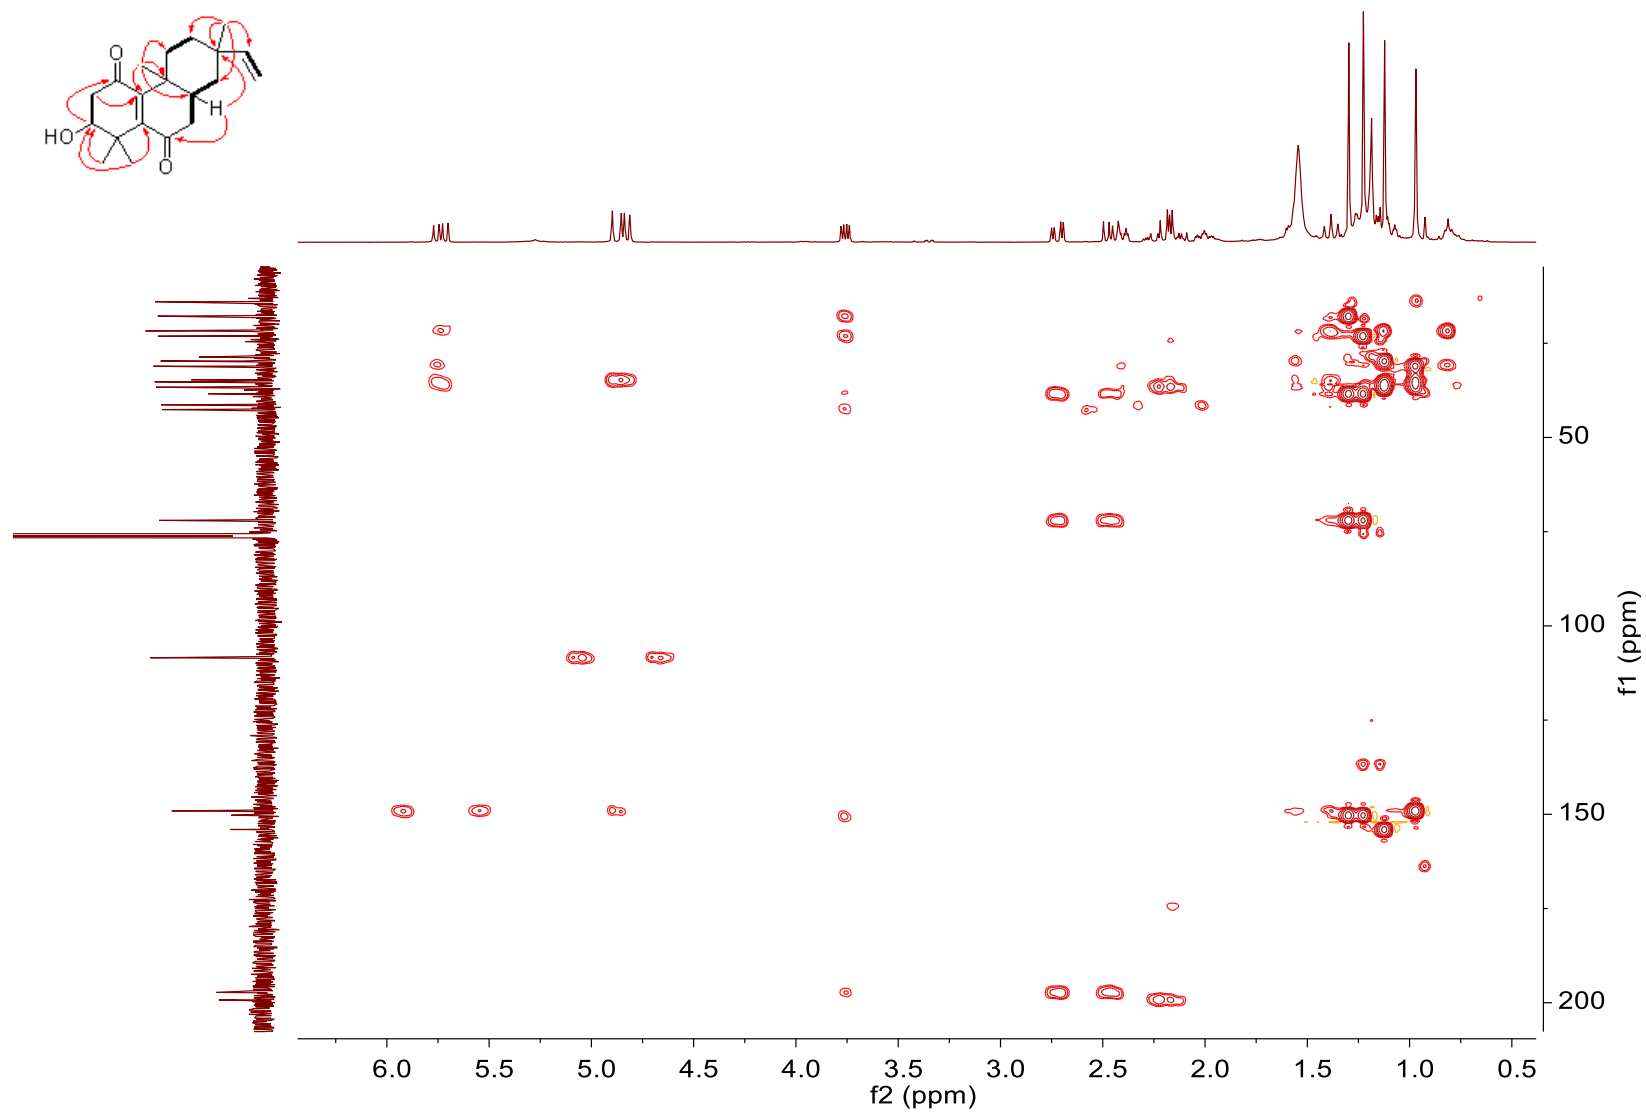

**Figure S55.** The HMBC Spectrum of Compound **7** in  $\text{CDCl}_3$



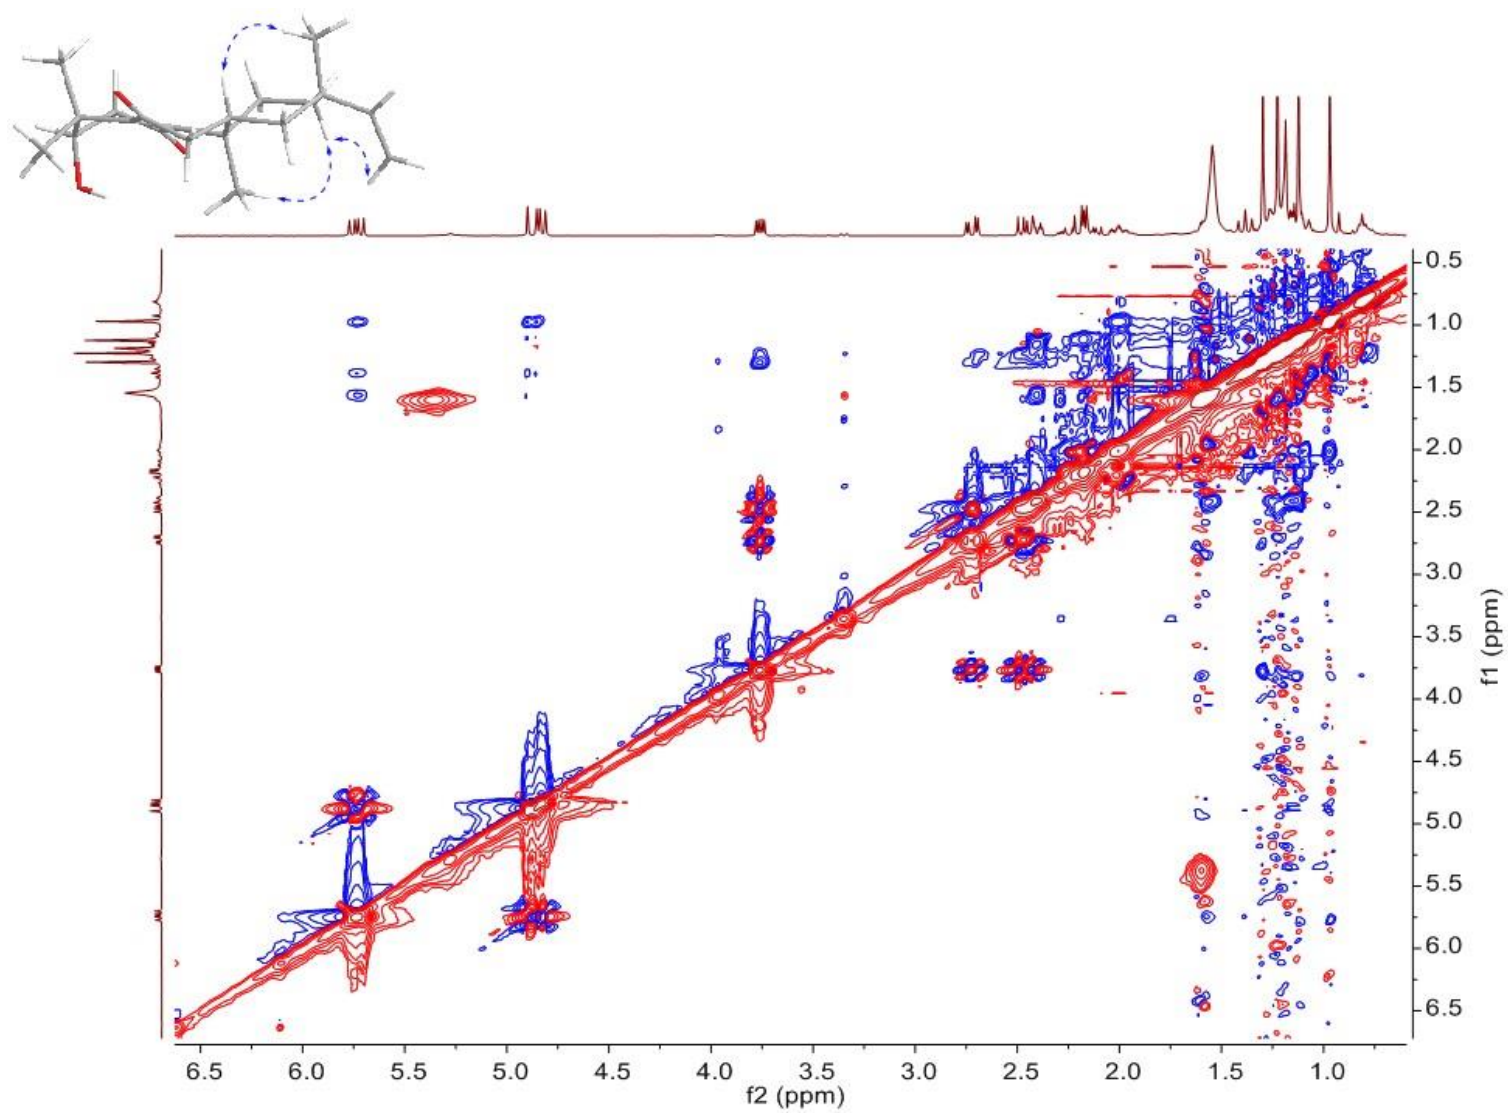

**Figure S56.** The NOESY Spectrum of Compound **7** in CDCl<sub>3</sub>

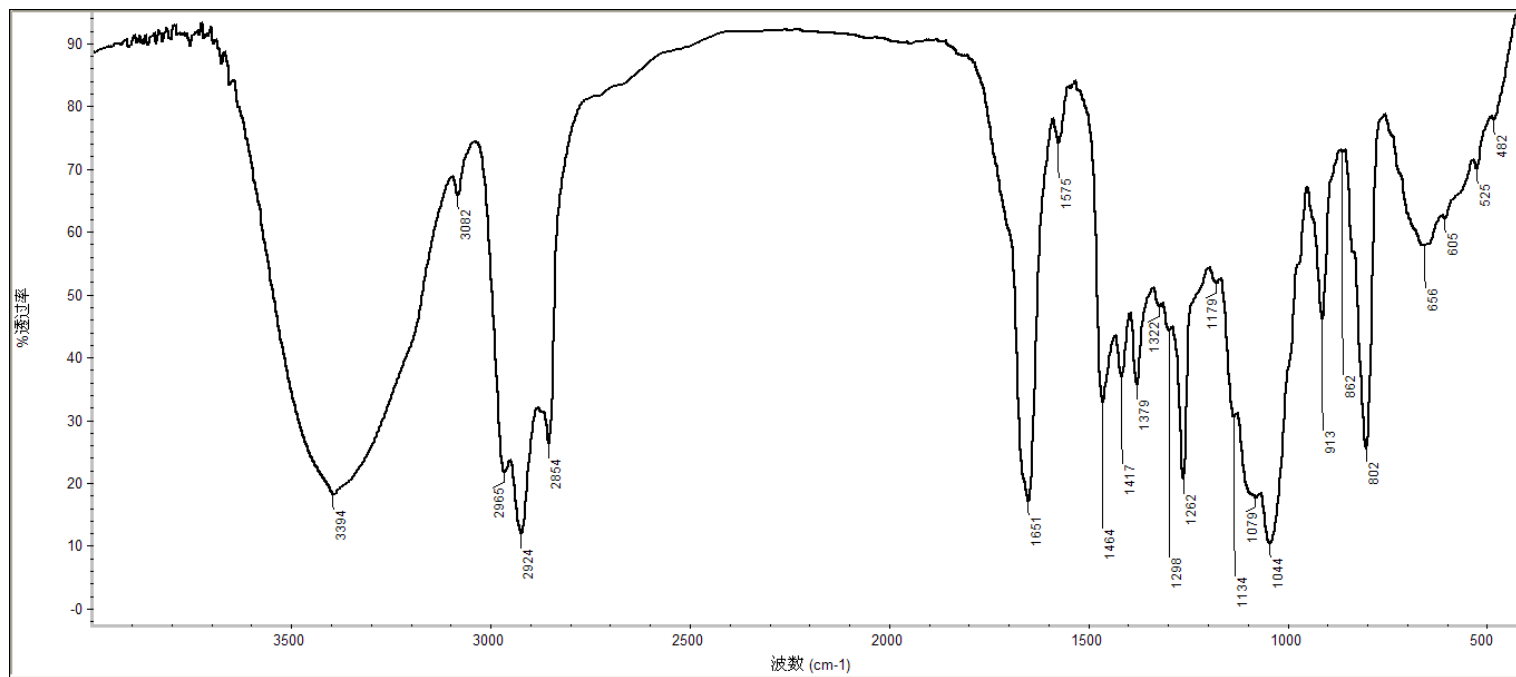

**Figure S57.** The IR Spectra of Compound **8**

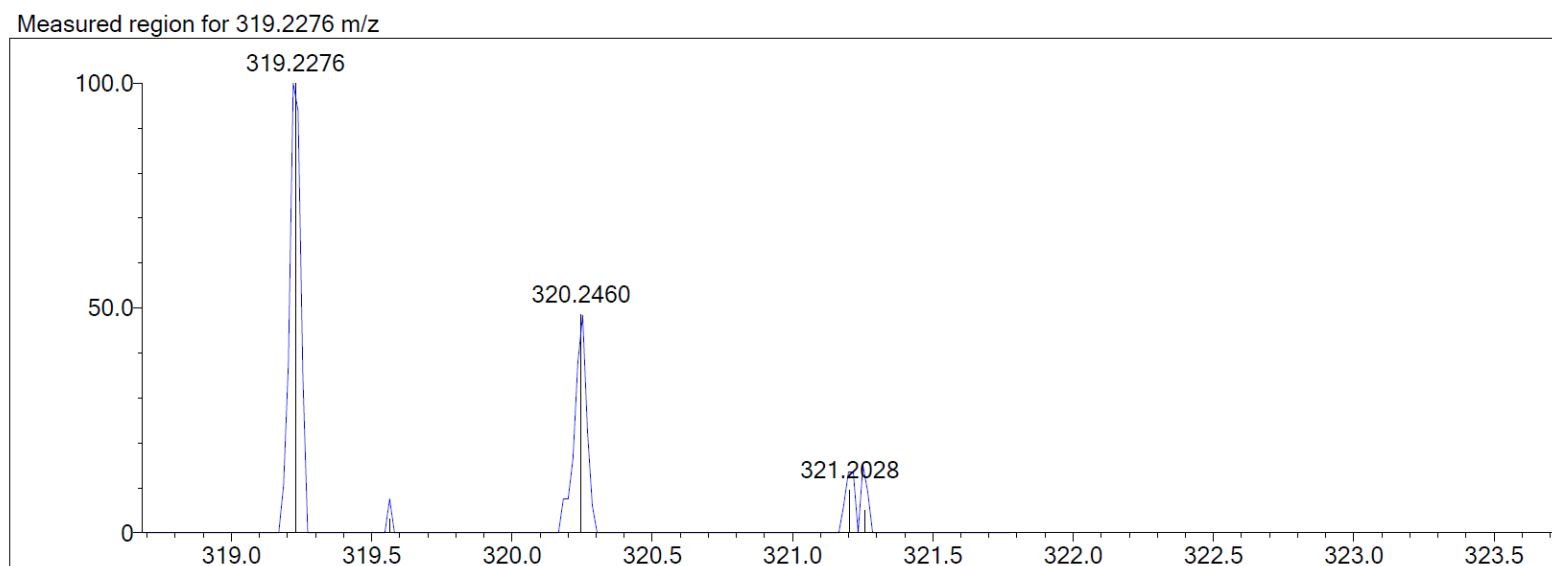

SPECTRUM -

simulation :

| m/z      | Theo. Mass | Delta (ppm) | RDB equiv. | Composition                                    |
|----------|------------|-------------|------------|------------------------------------------------|
| 319.2276 | 319.2268   | 2.51        | 6.0        | C <sub>20</sub> H <sub>31</sub> O <sub>3</sub> |

**Figure S58.** The HRESIMS Spectroscopic Data of Compound **8**

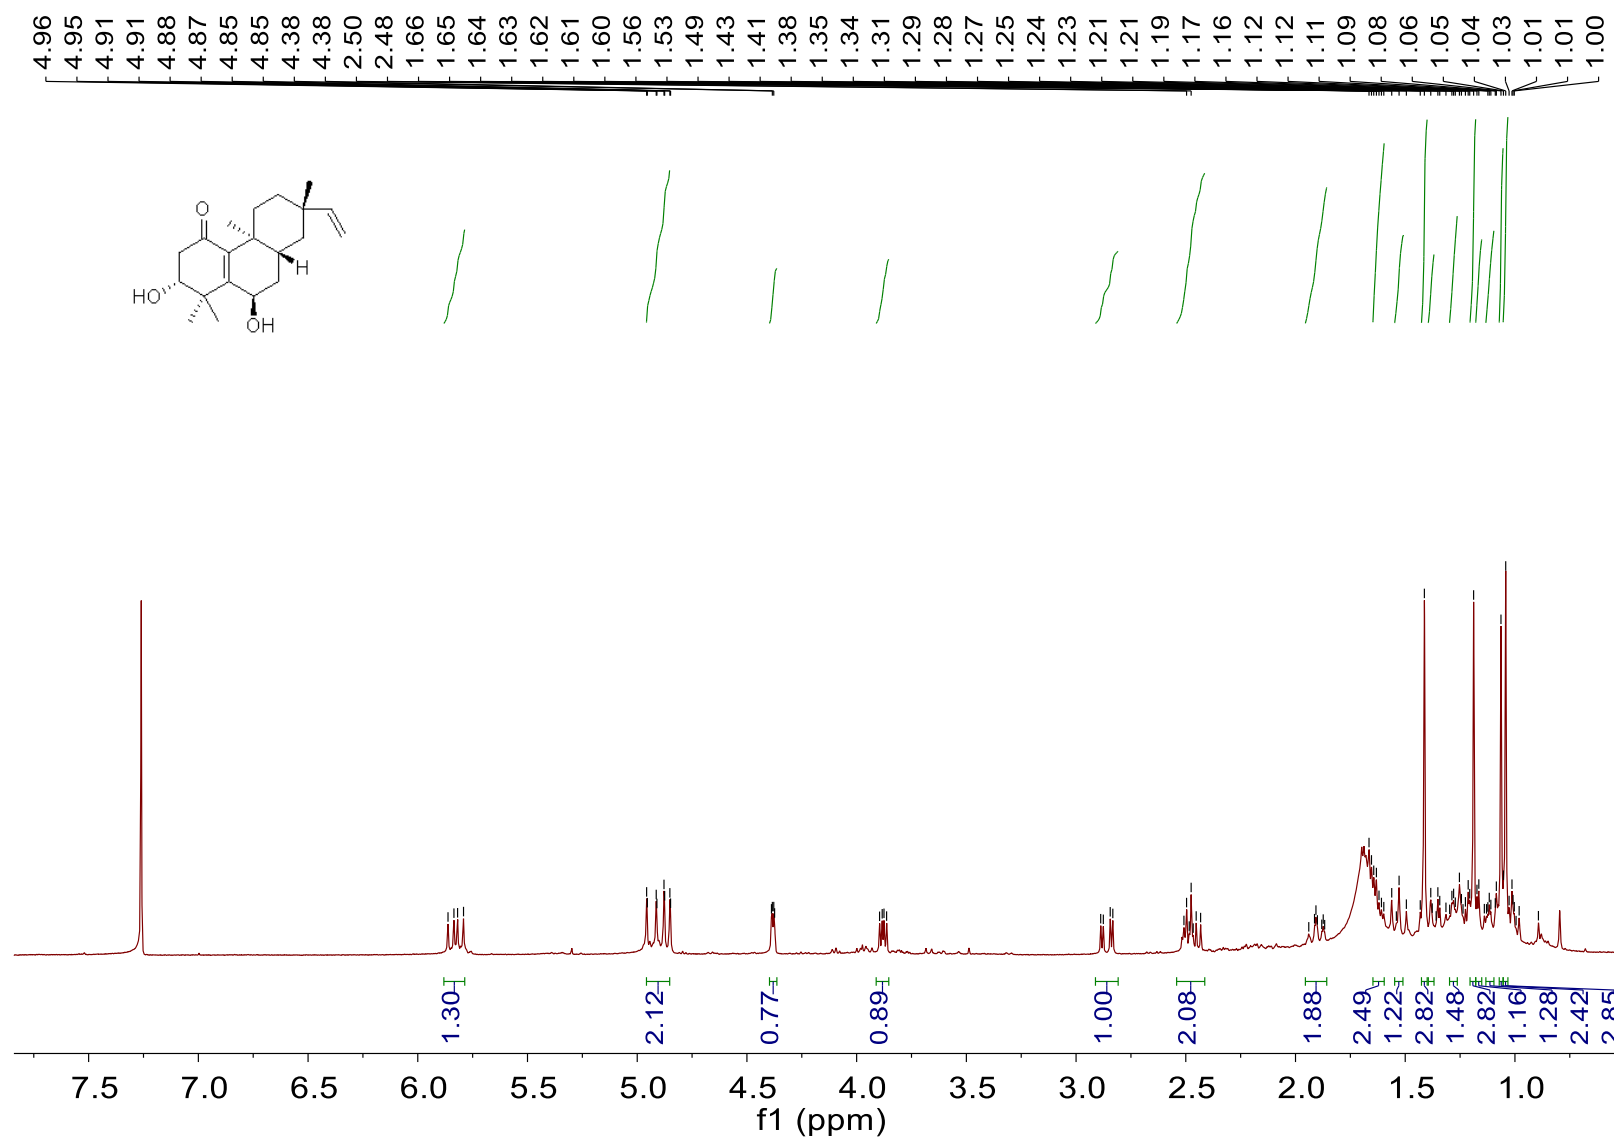

**Figure S59.** The <sup>1</sup>H NMR Spectrum of Compound **8** in CDCl<sub>3</sub>

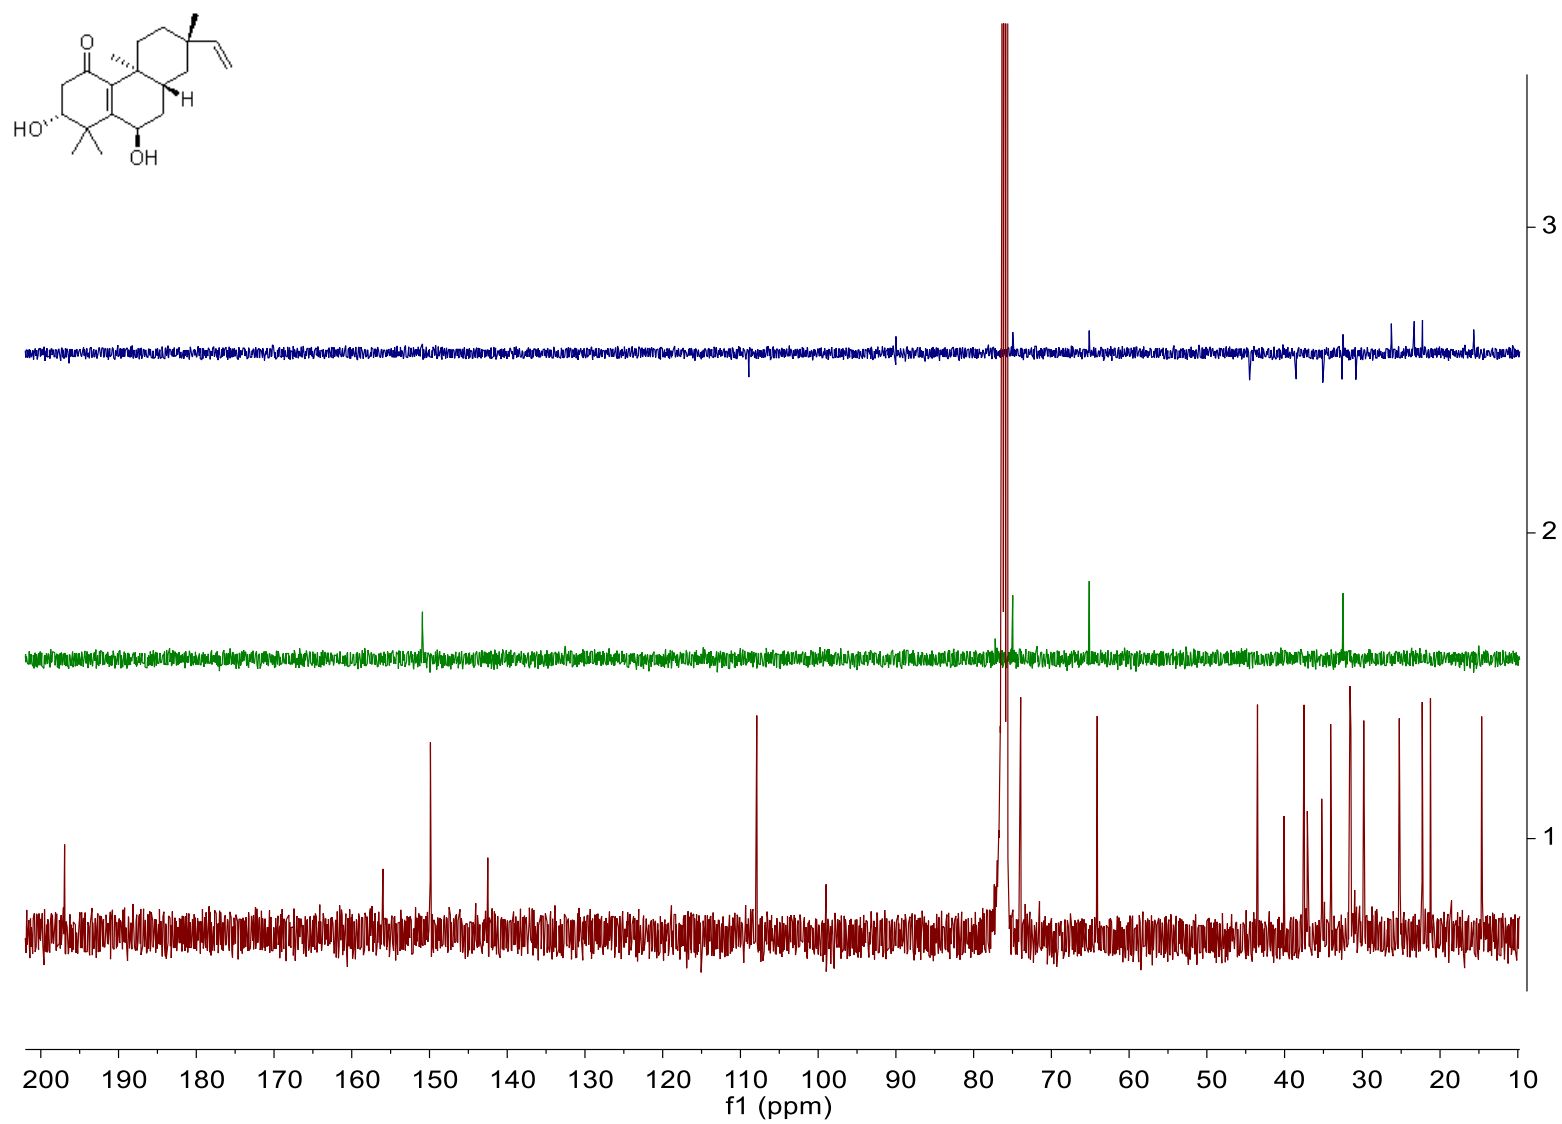

**Figure S60.** The  $^{13}\text{C}$  NMR Spectrum of Compound **8** in  $\text{CDCl}_3$

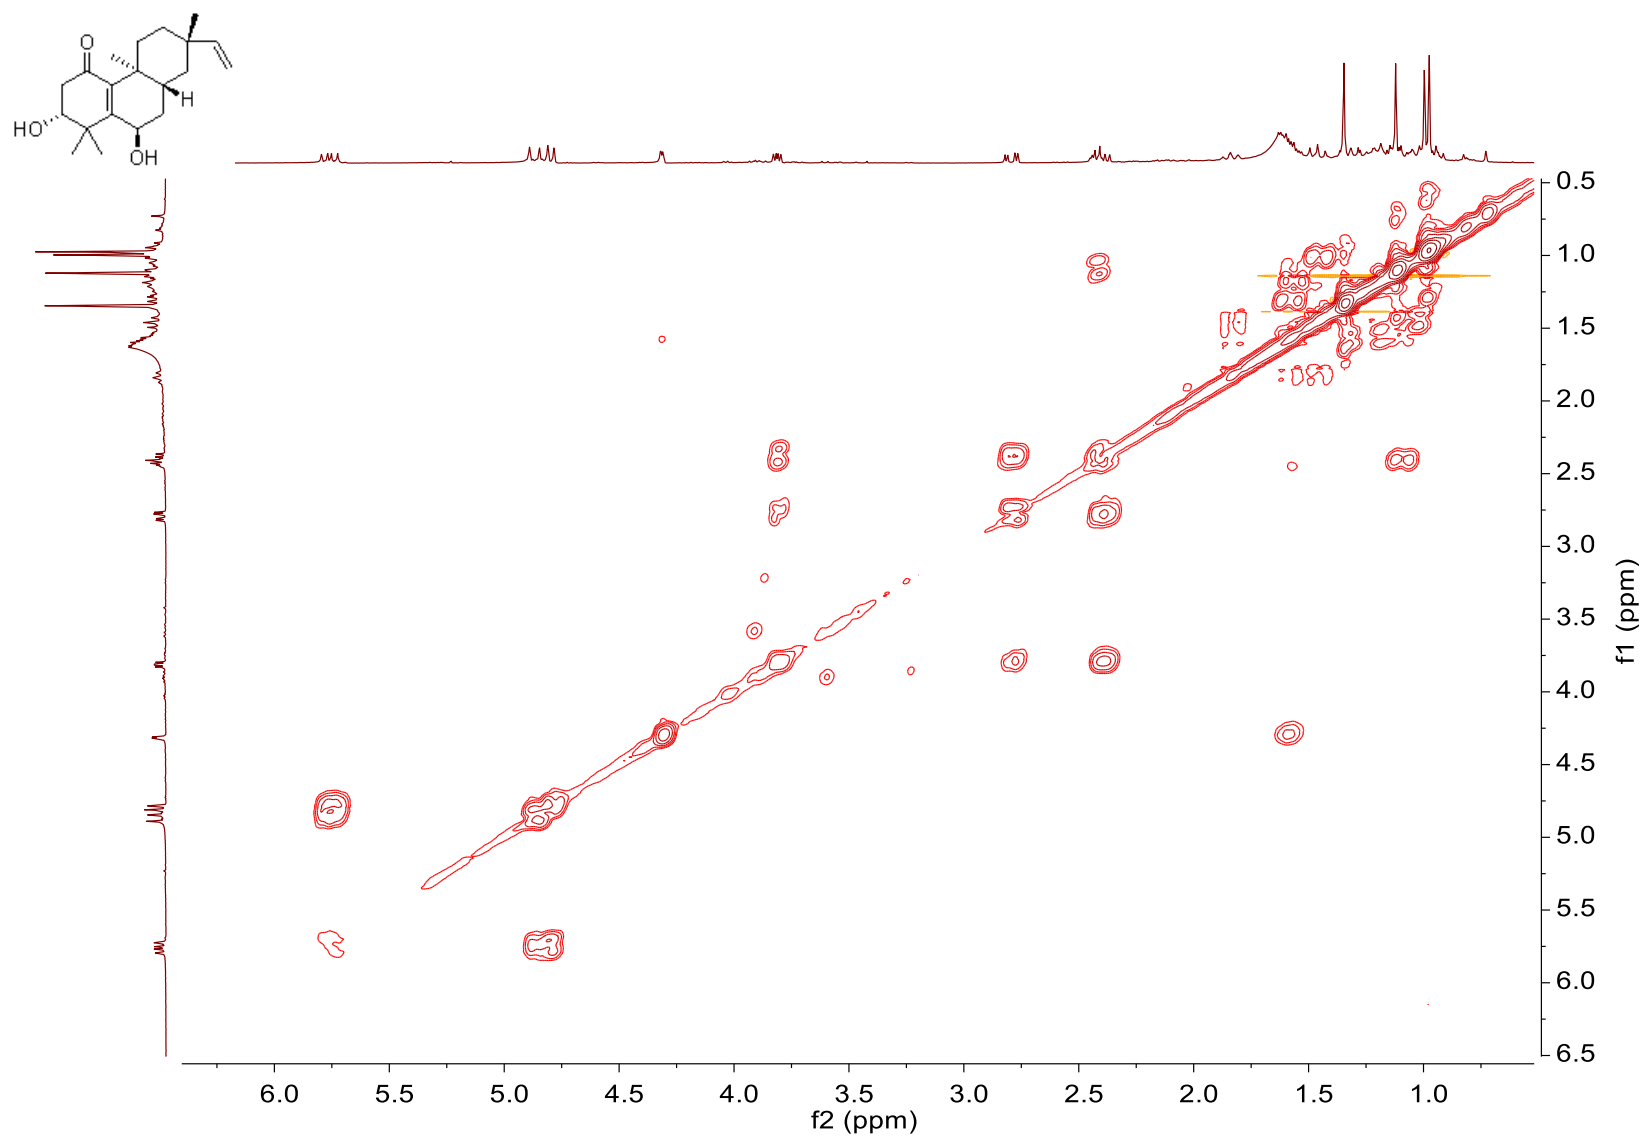

**Figure S61.** The  $^1\text{H}$ - $^1\text{H}$  COSY Spectrum of Compound **8** in  $\text{CDCl}_3$

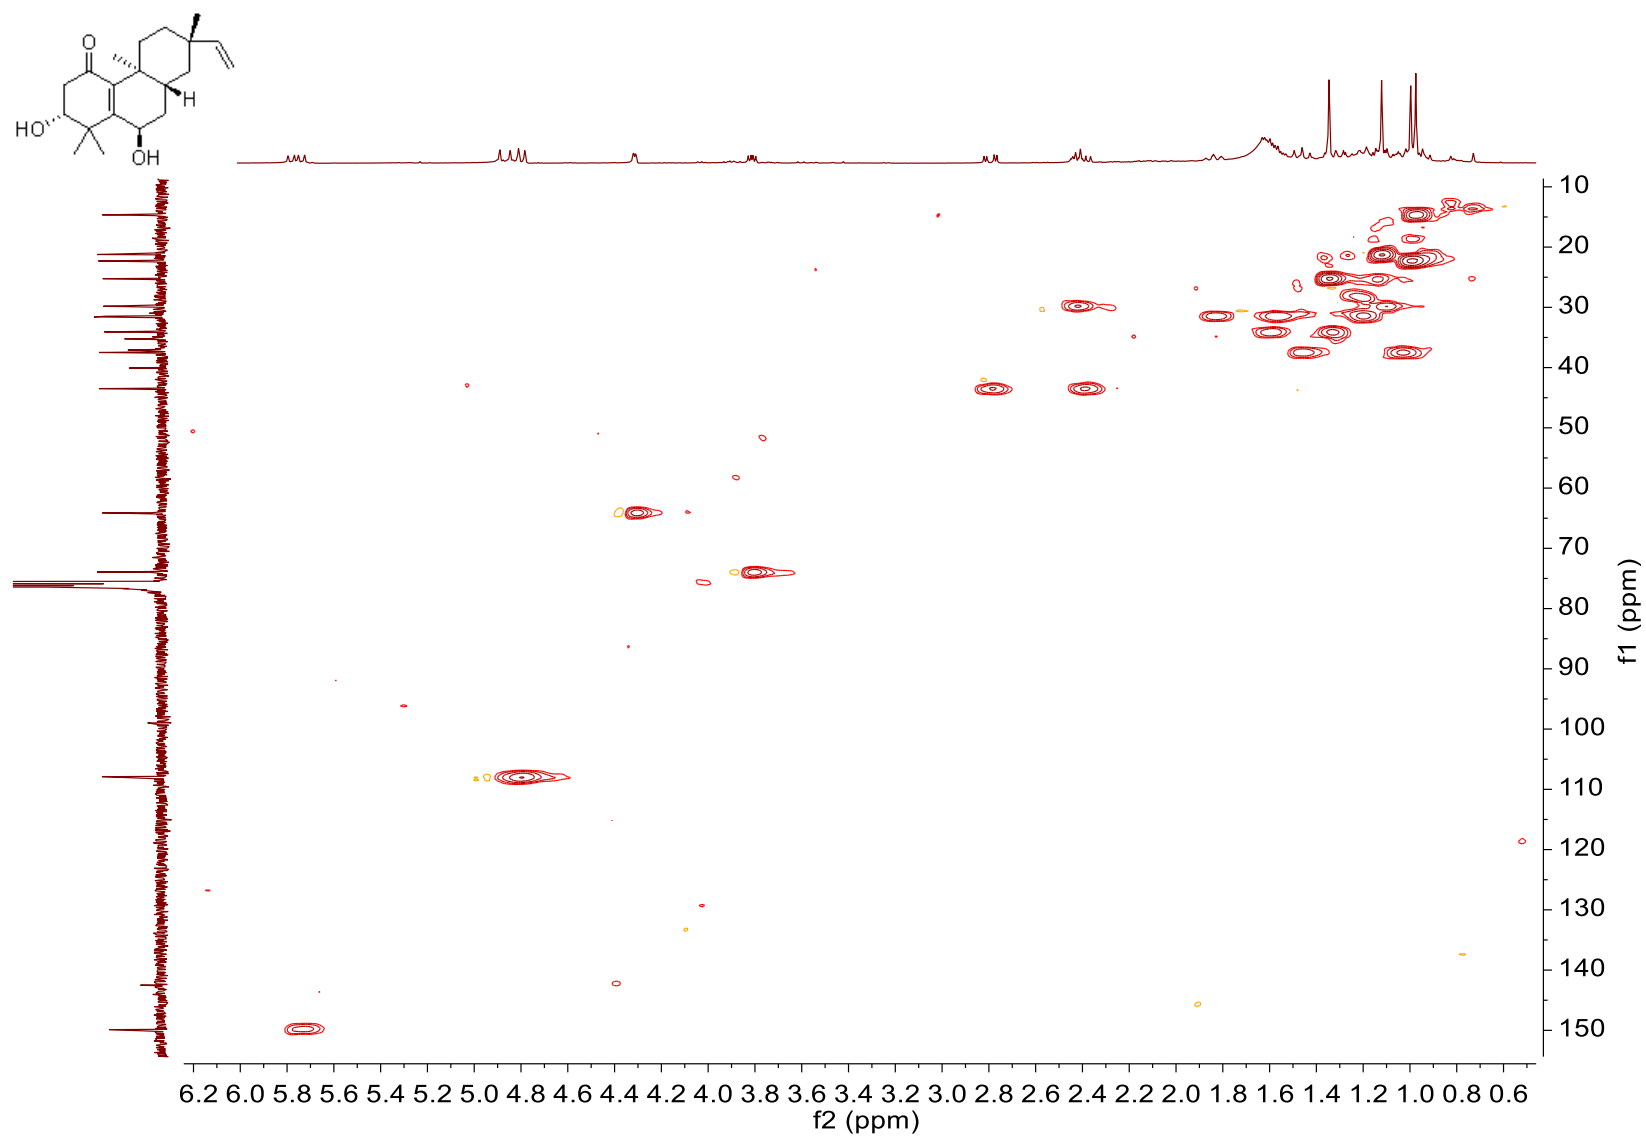

**Figure S62.** The HSQC Spectrum of Compound **8** in CDCl<sub>3</sub>

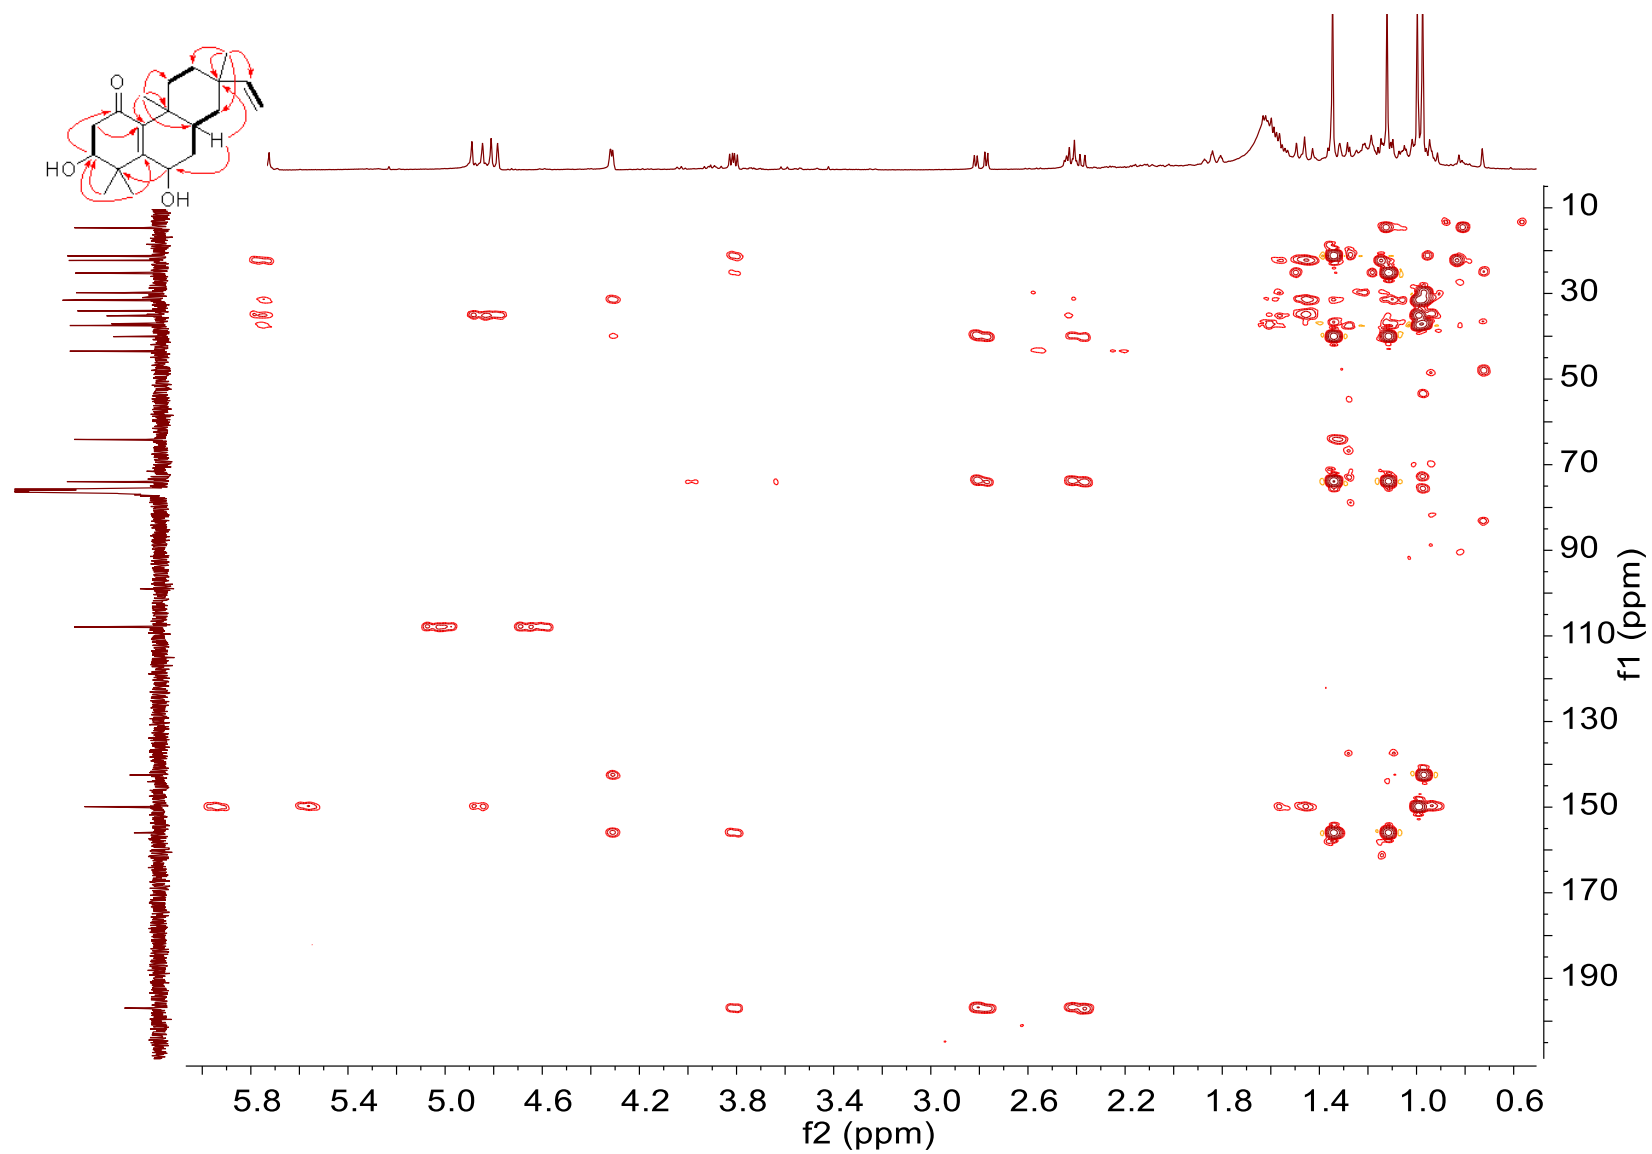

**Figure S63.** The HMBC Spectrum of Compound **8** in CDCl<sub>3</sub>



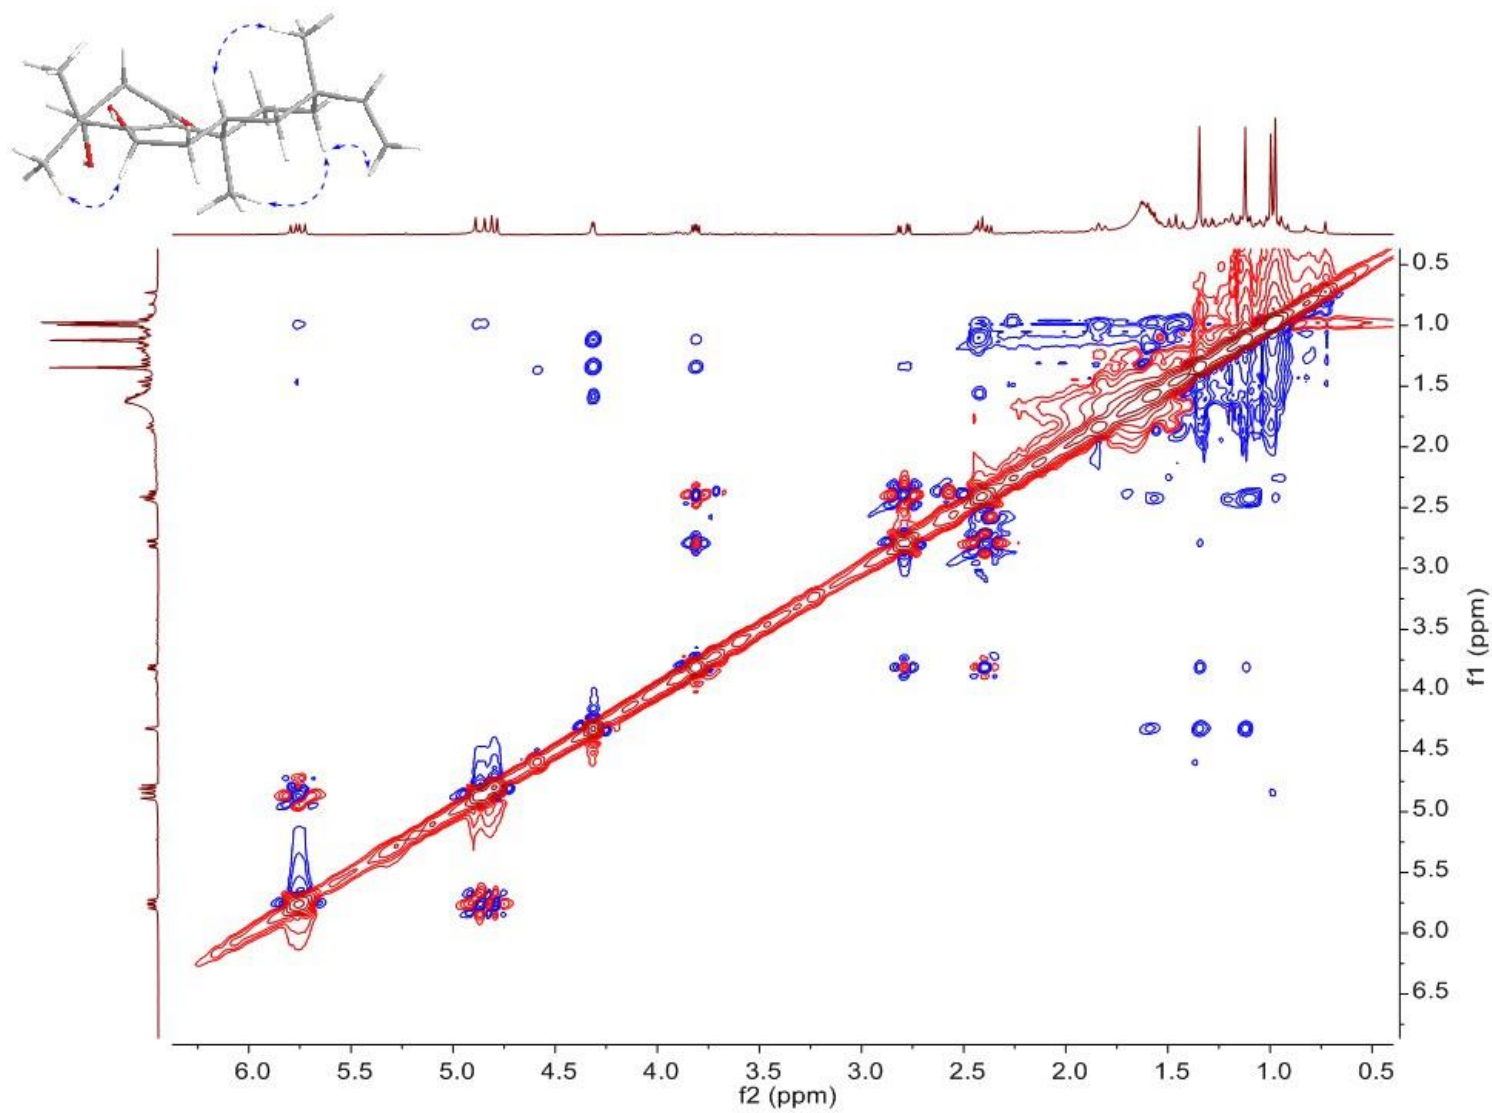

**Figure S64.** The NOESY Spectrum of Compound **8** in CDCl<sub>3</sub>

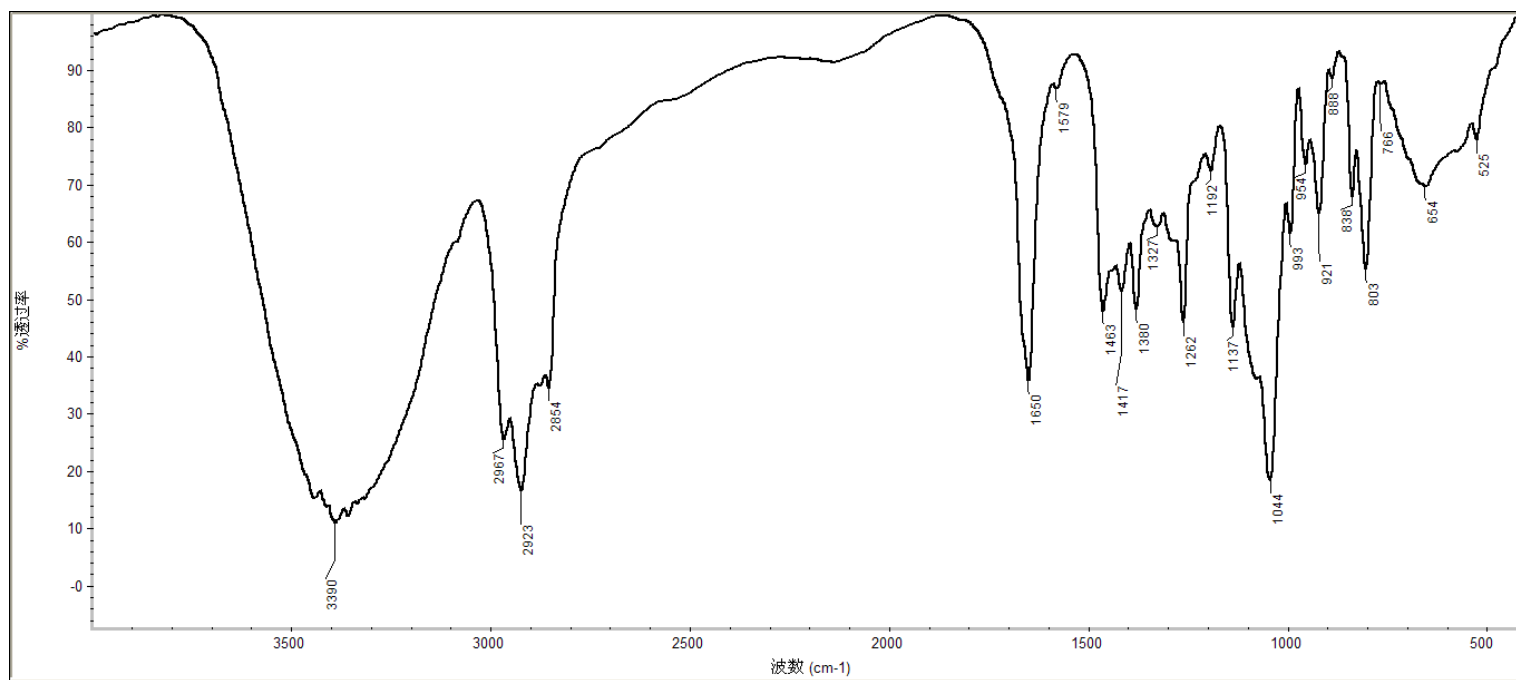

**Figure S65.** The IR Spectra of Compound **9**

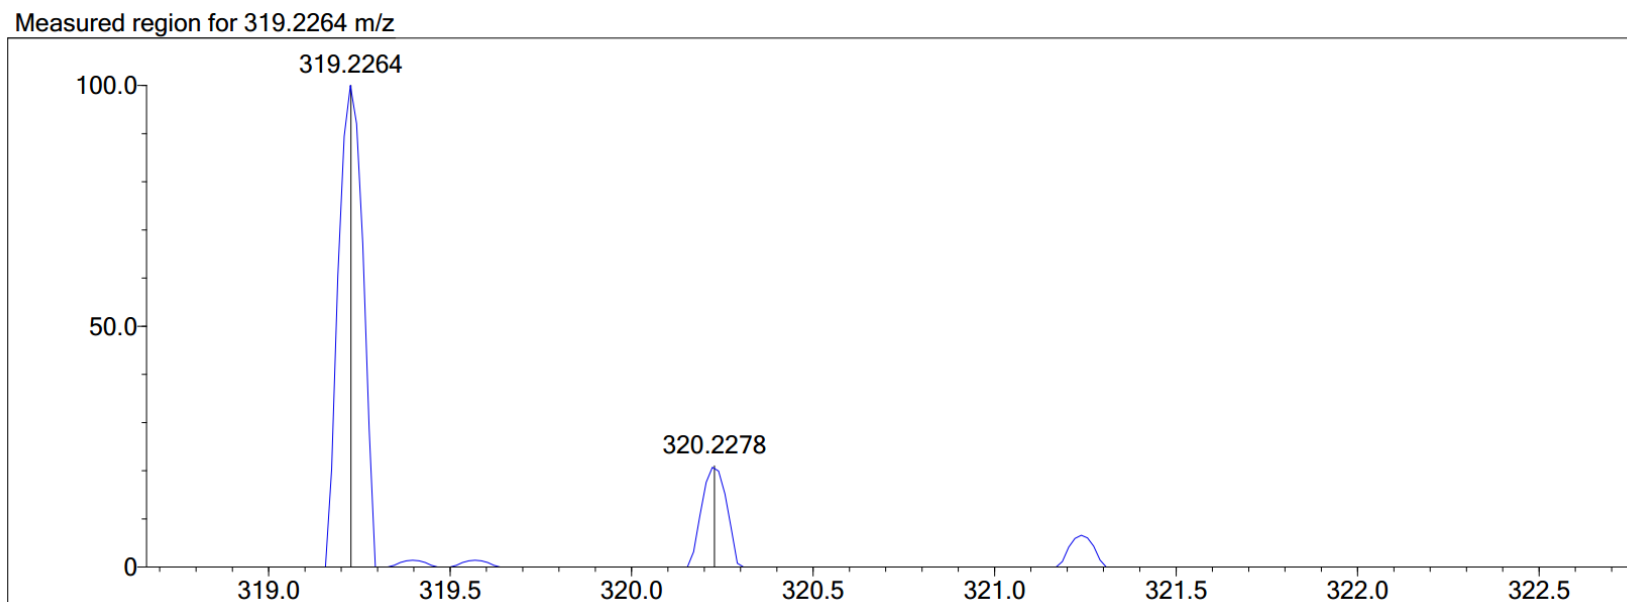

SPECTRUM -

simulation :

| m/z      | Theo. Mass | Delta (ppm) | RDB equiv. | Composition                                    |
|----------|------------|-------------|------------|------------------------------------------------|
| 319.2264 | 319.2268   | -1.25       | 6.0        | C <sub>20</sub> H <sub>30</sub> O <sub>3</sub> |

**Figure S66.** The HRESIMS Spectroscopic Data of Compound **9**

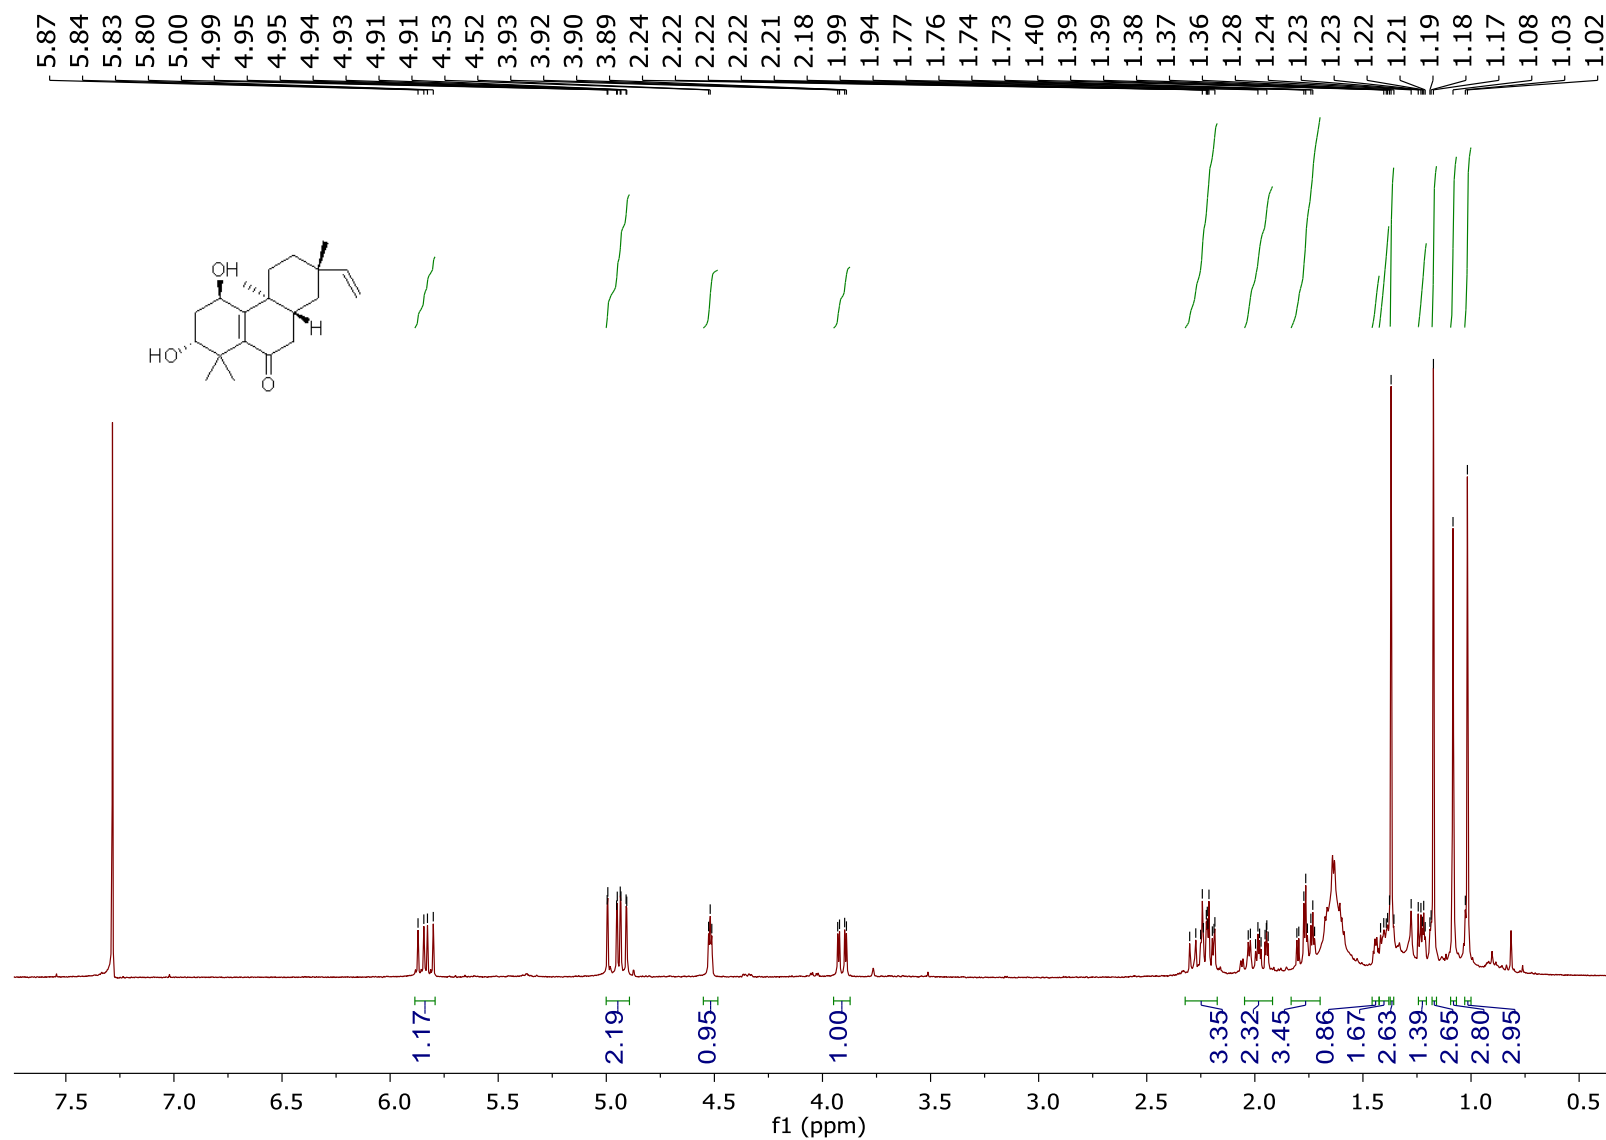

**Figure S67.** The <sup>1</sup>H NMR Spectrum of Compound **9** in CDCl<sub>3</sub>

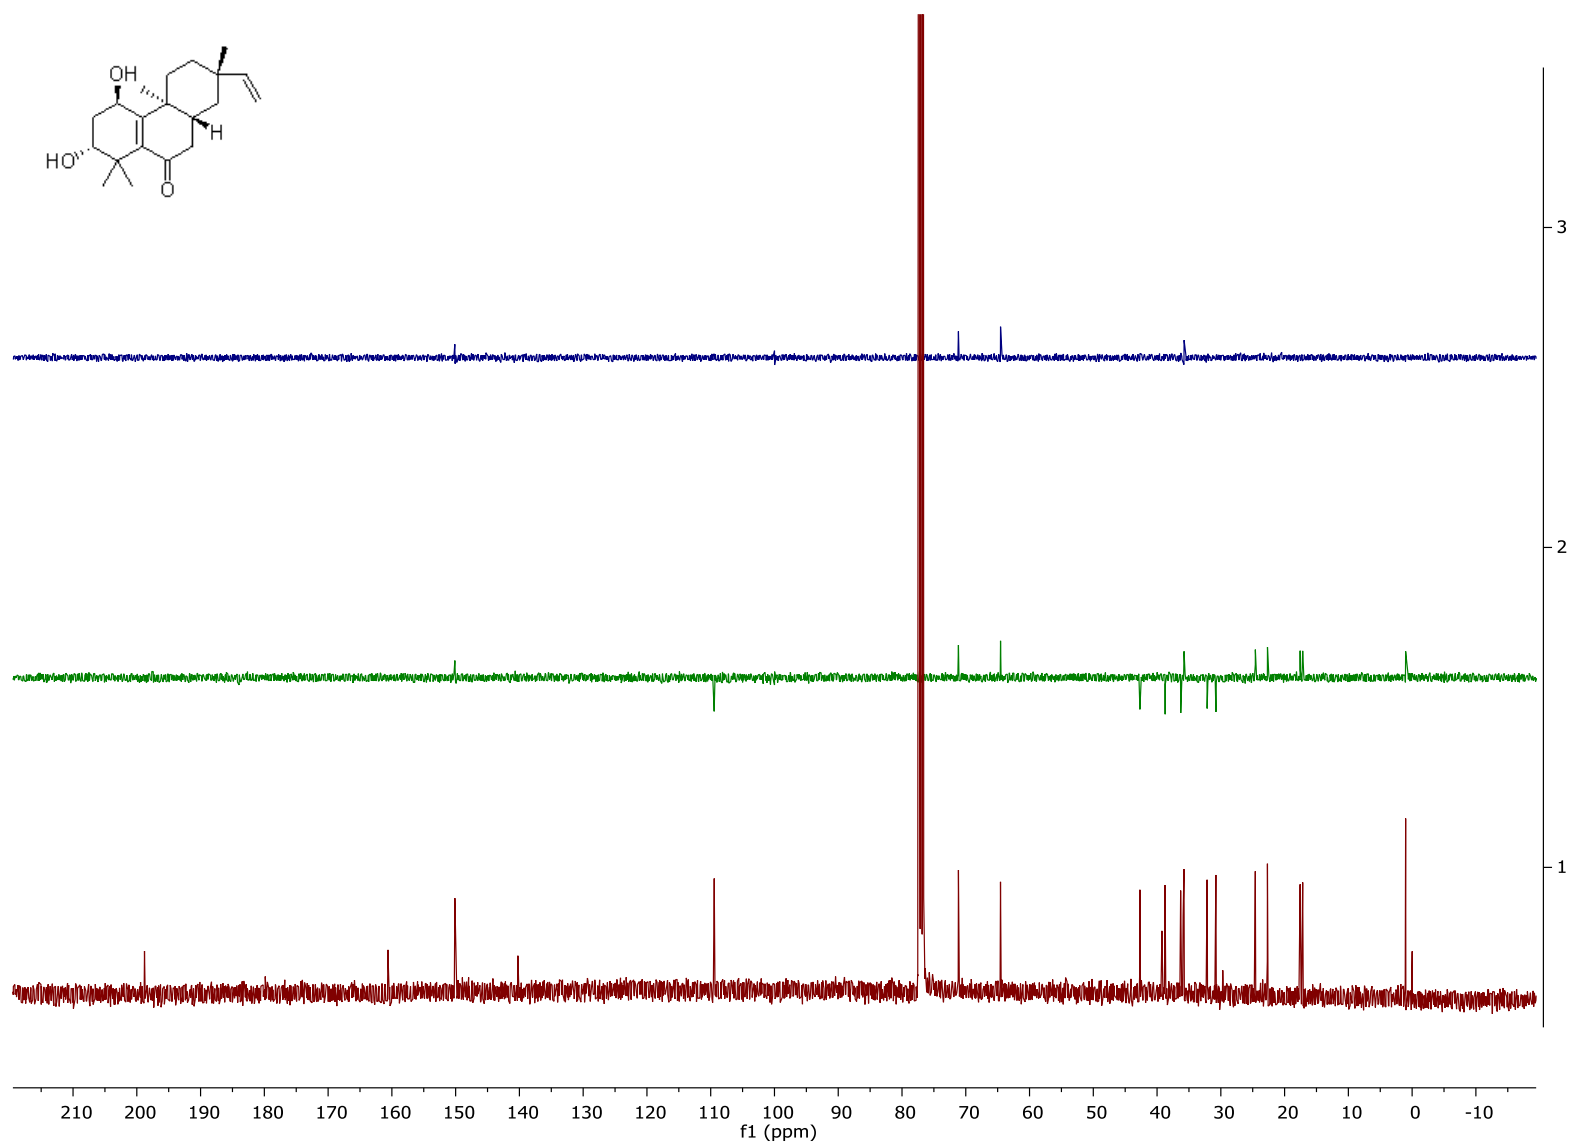

**Figure S68.** The  $^{13}\text{C}$  NMR Spectrum of Compound **9** in  $\text{CDCl}_3$

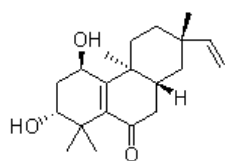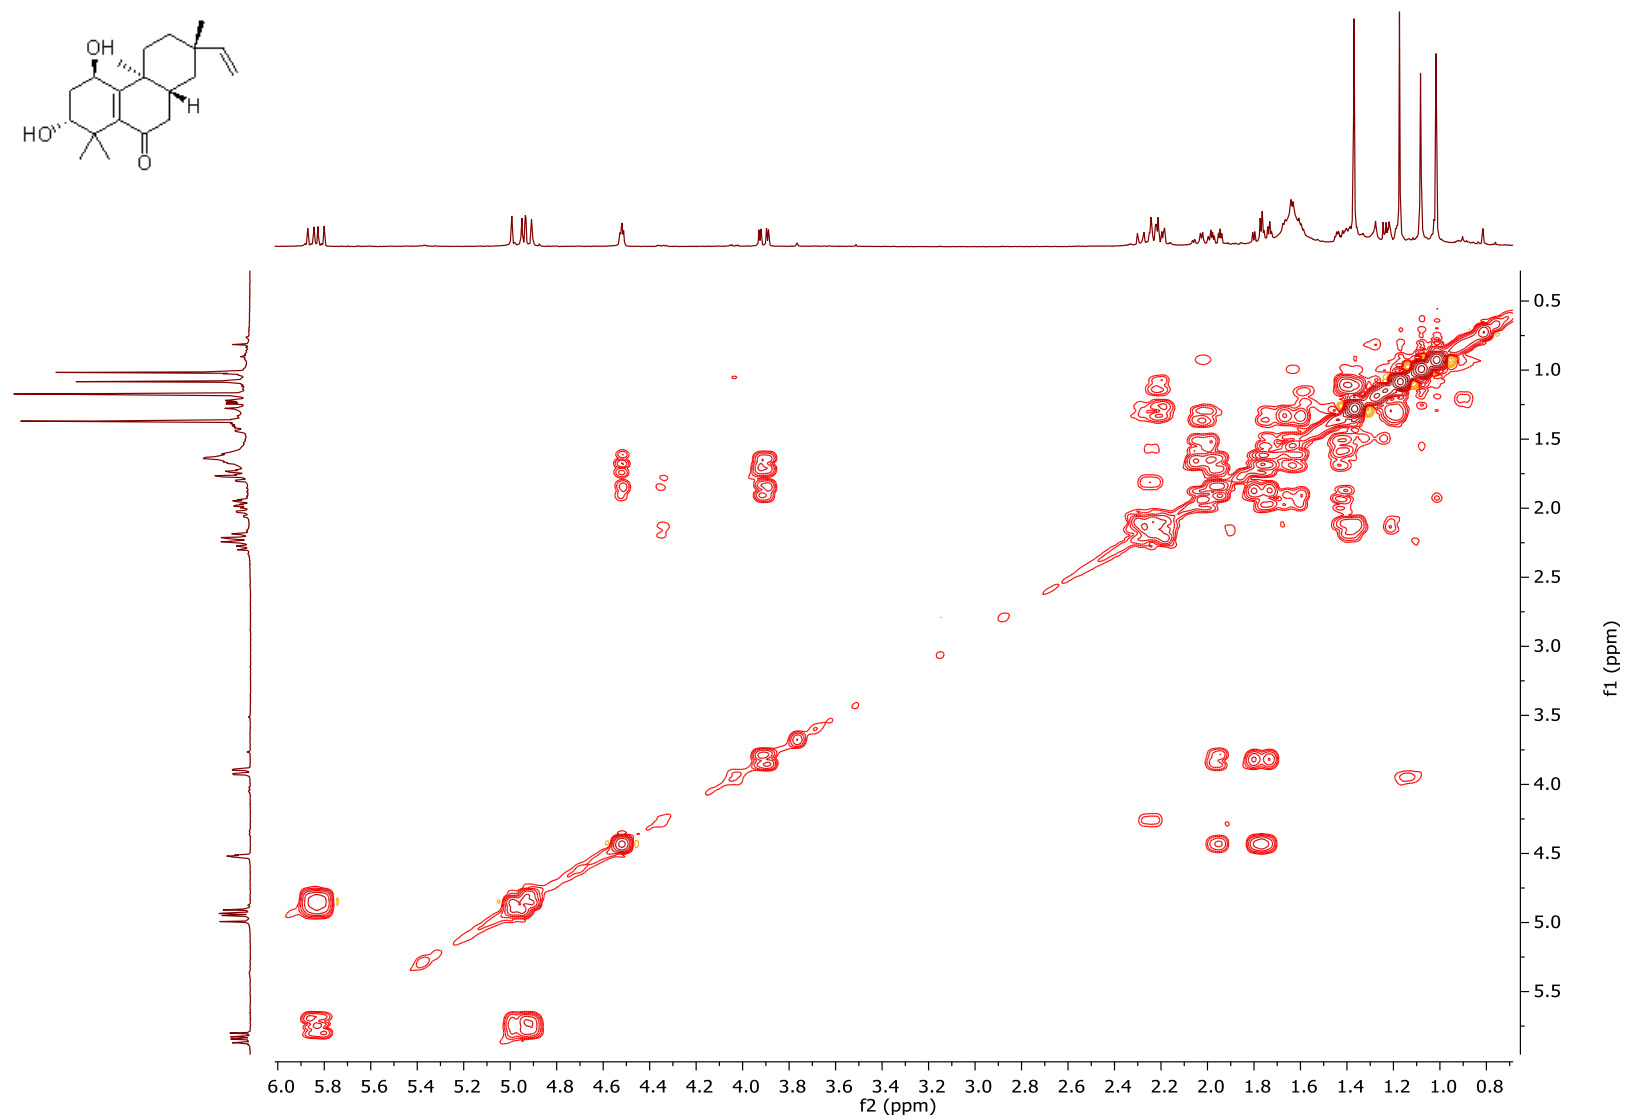

**Figure S69.** The  $^1\text{H}$ - $^1\text{H}$  COSY Spectrum of Compound **9** in  $\text{CDCl}_3$

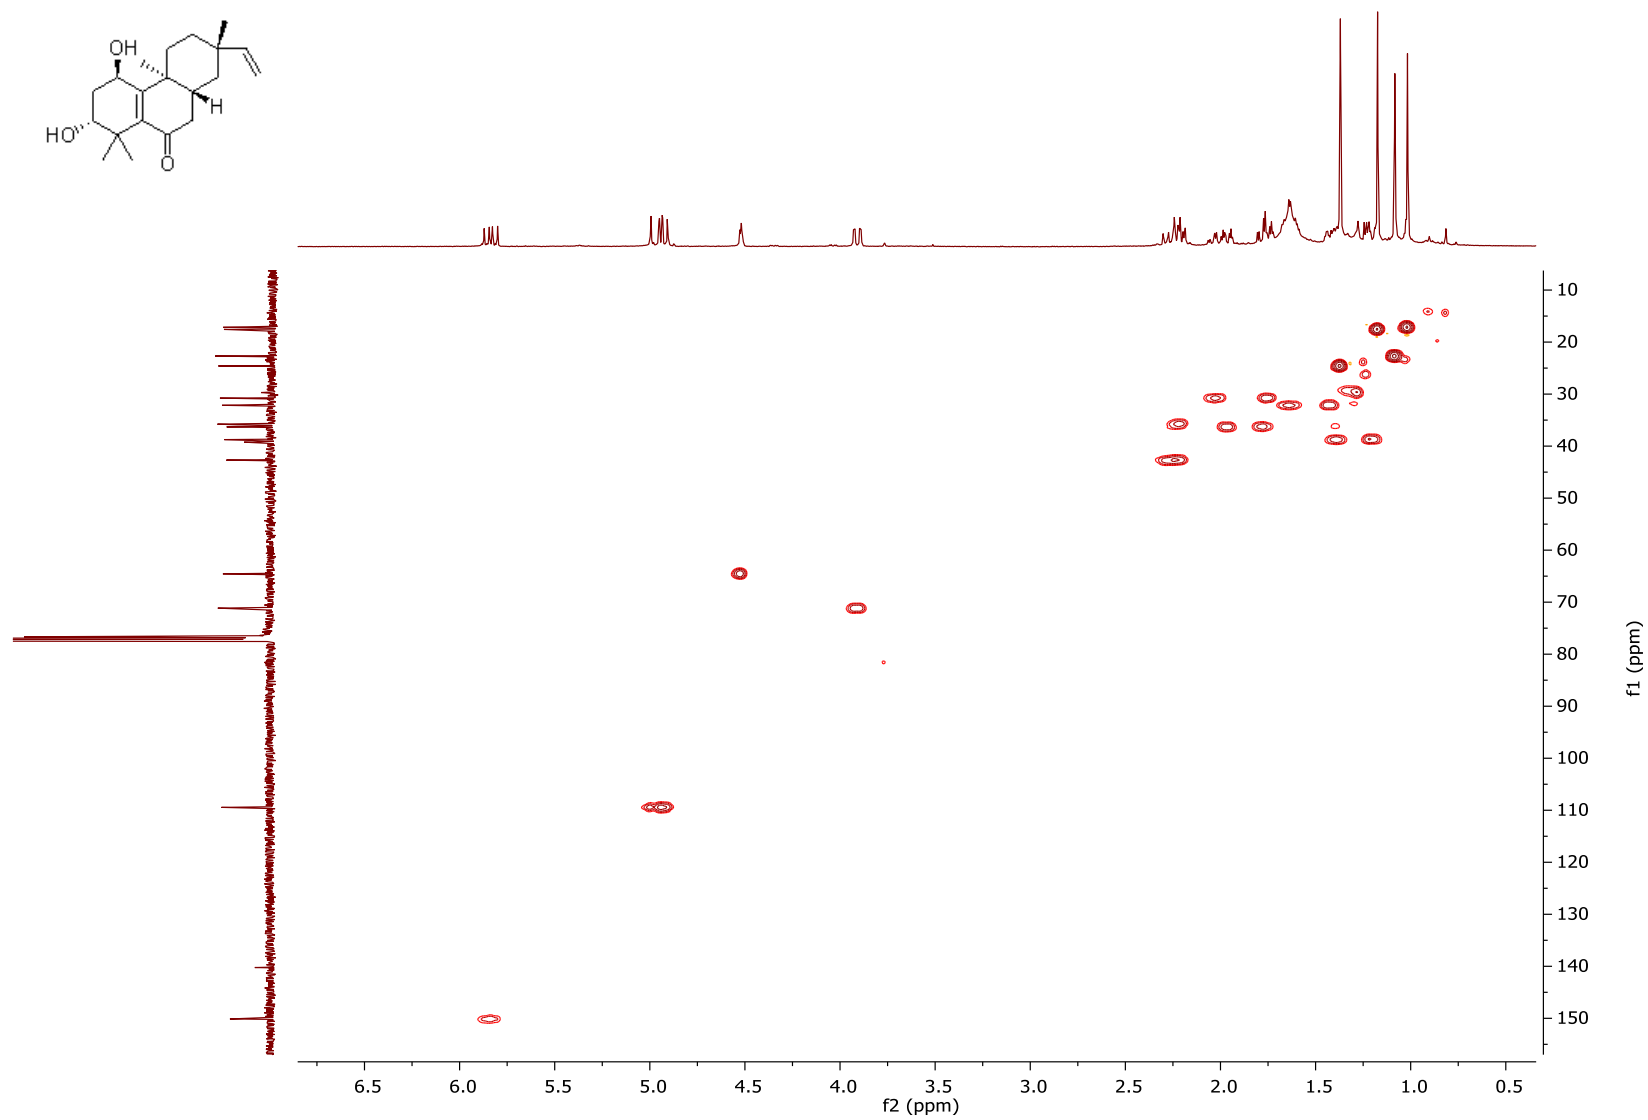

**Figure S70.** The HSQC Spectrum of Compound **9** in CDCl<sub>3</sub>

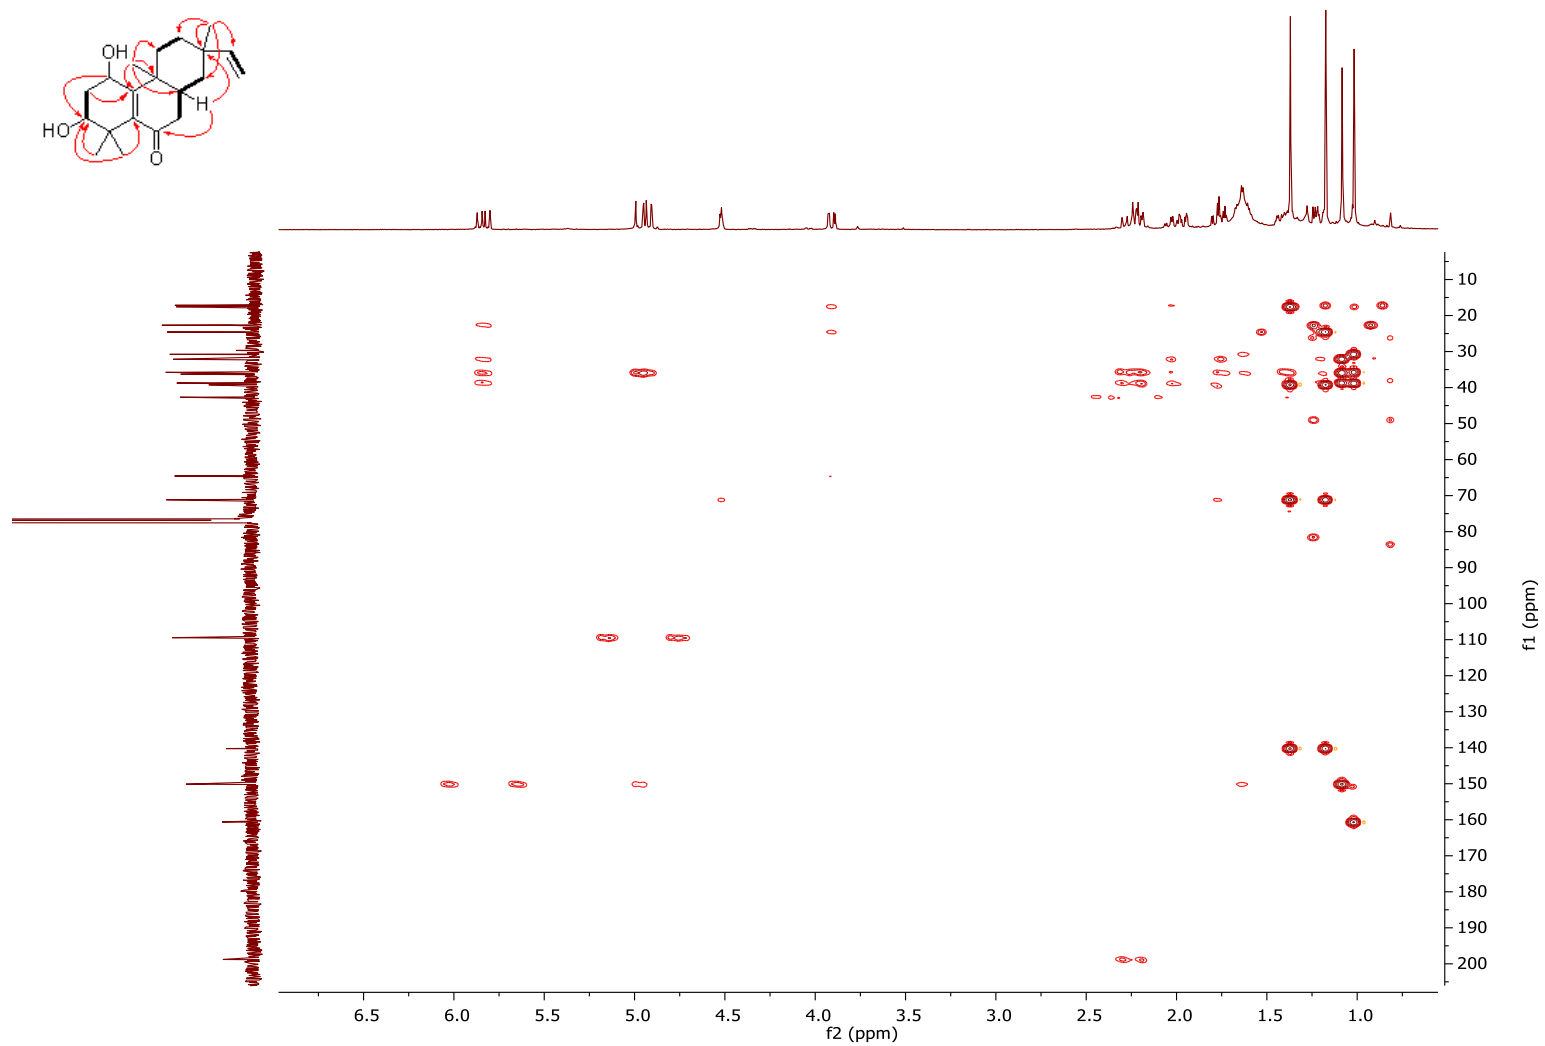

**Figure S71.** The HMBC Spectrum of Compound **9** in CDCl<sub>3</sub>



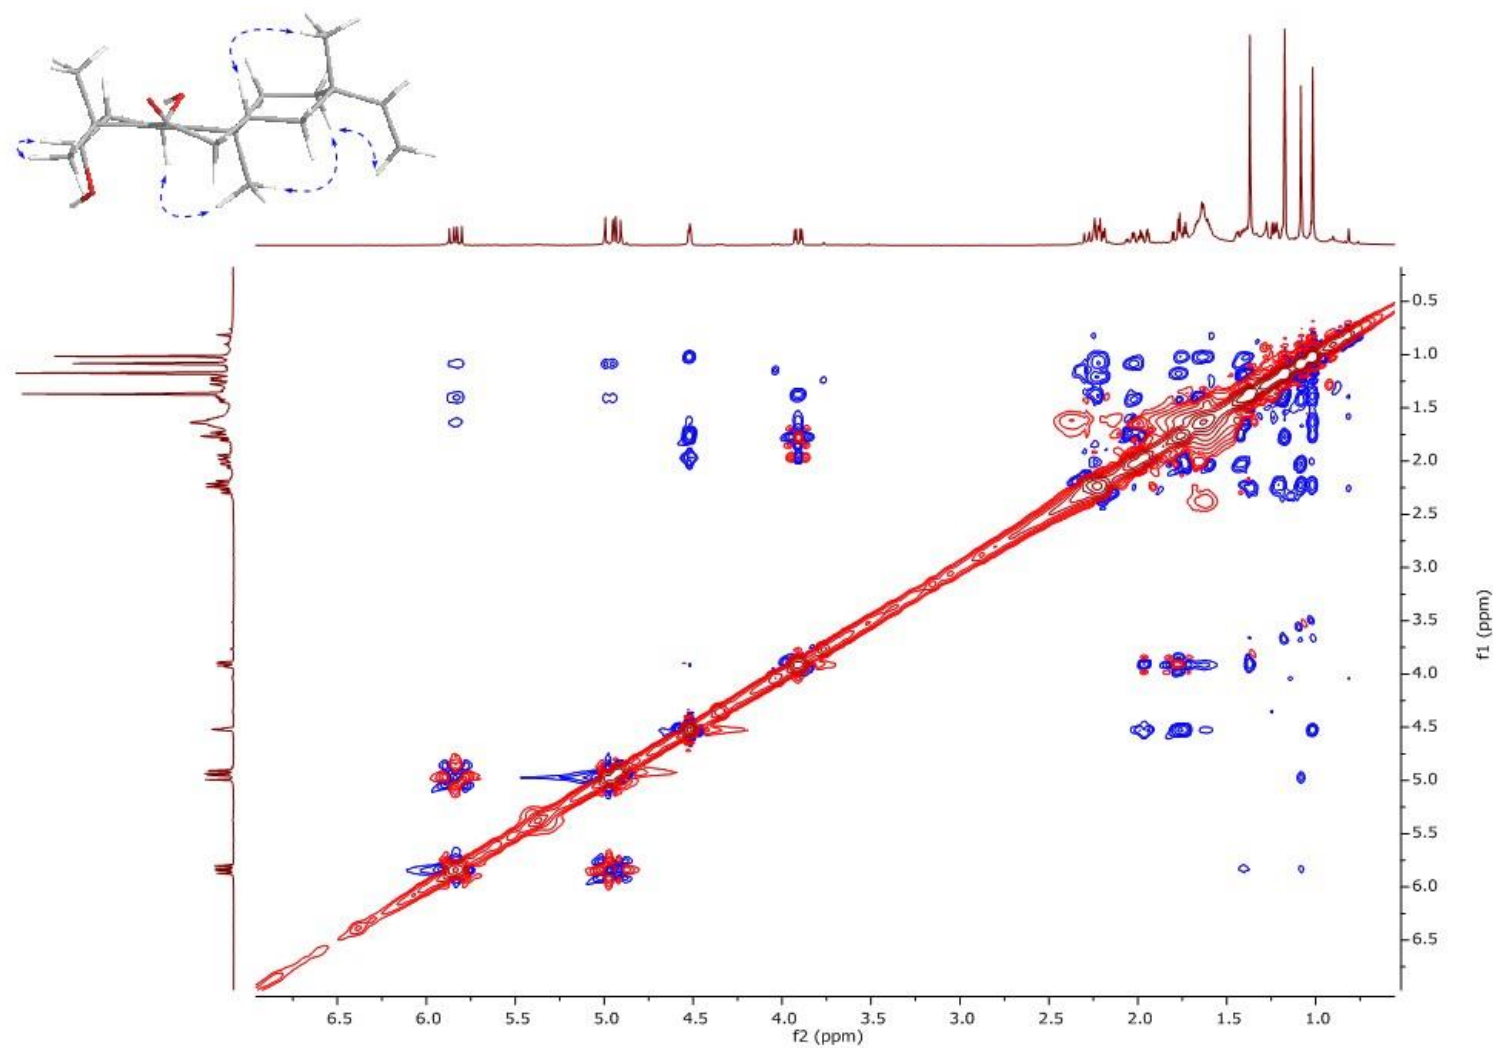

**Figure S72.** The NOESY Spectrum of Compound **9** in CDCl<sub>3</sub>

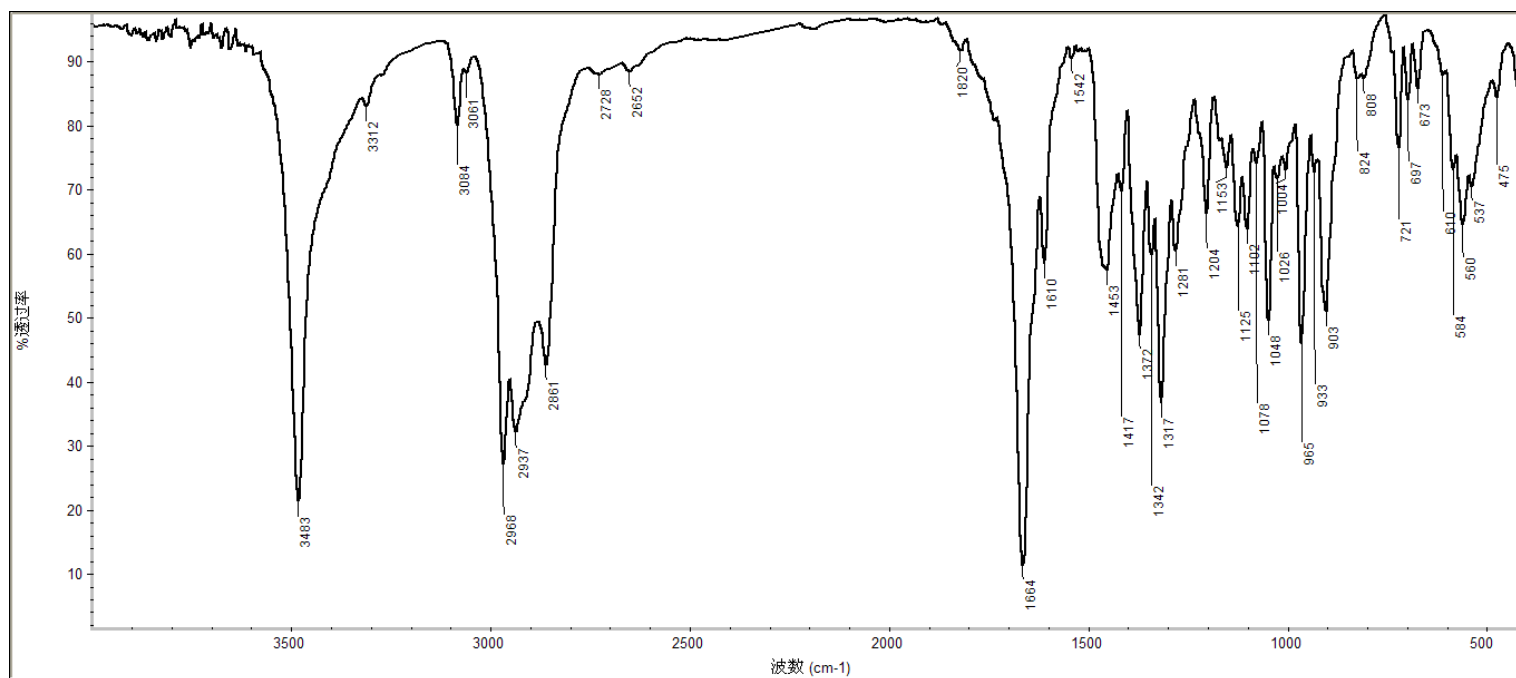

**Figure S73.** The IR Spectra of Compound **10**

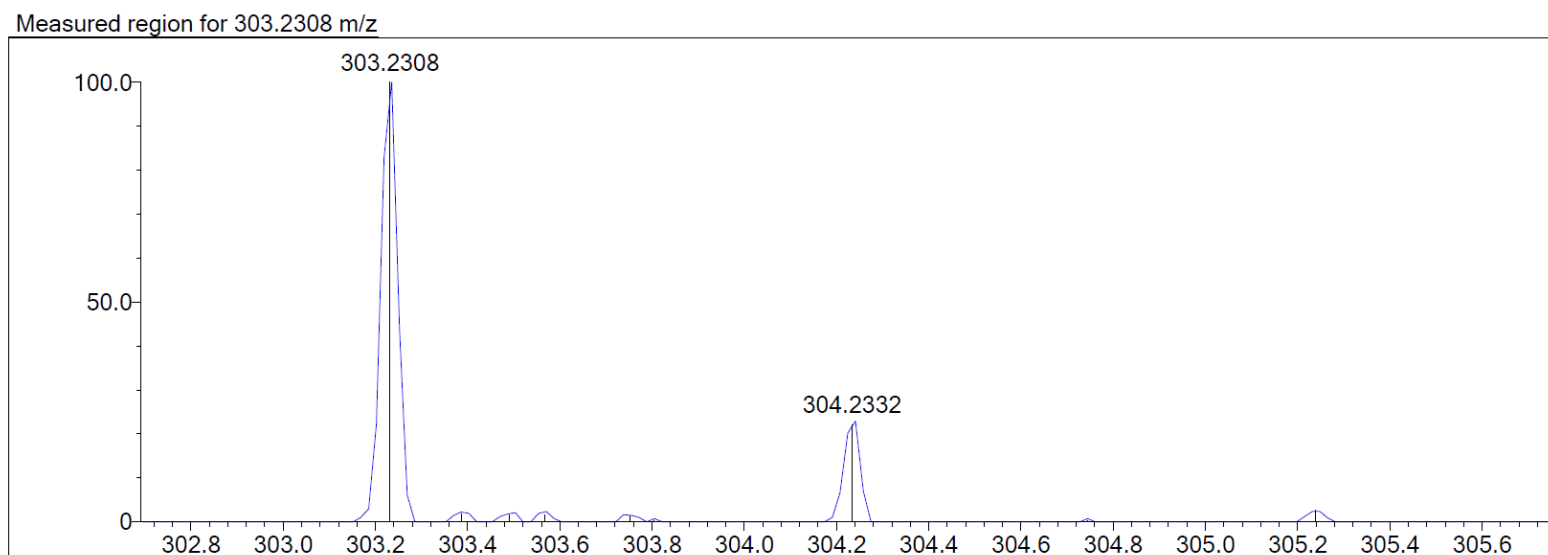


---

SPECTRUM -

simulation :

---

| m/z      | Theo. Mass | Delta (ppm) | RDB equiv. | Composition                                    |
|----------|------------|-------------|------------|------------------------------------------------|
| 303.2308 | 303.2319   | -3.63       | 6.0        | C <sub>20</sub> H <sub>31</sub> O <sub>2</sub> |

---

**Figure S74.** The HRESIMS Spectroscopic Data of Compound **10**

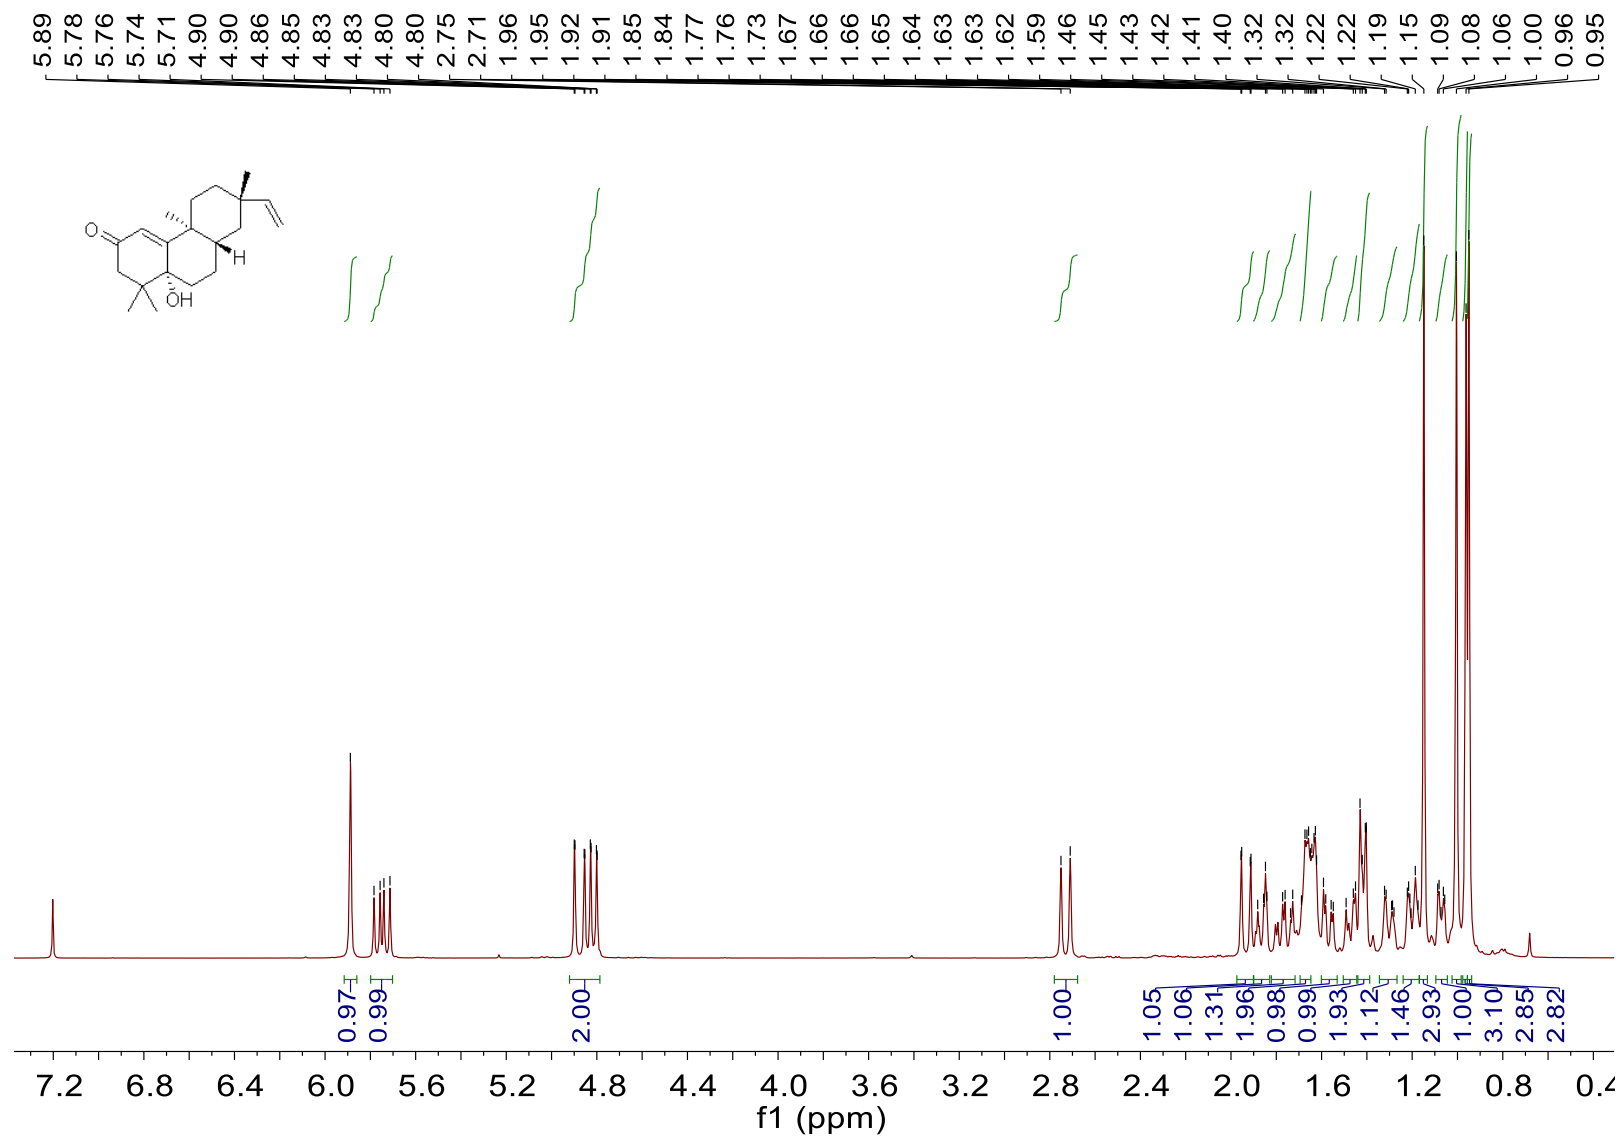

**Figure S75.** The <sup>1</sup>H NMR Spectrum of Compound **10** in CDCl<sub>3</sub>

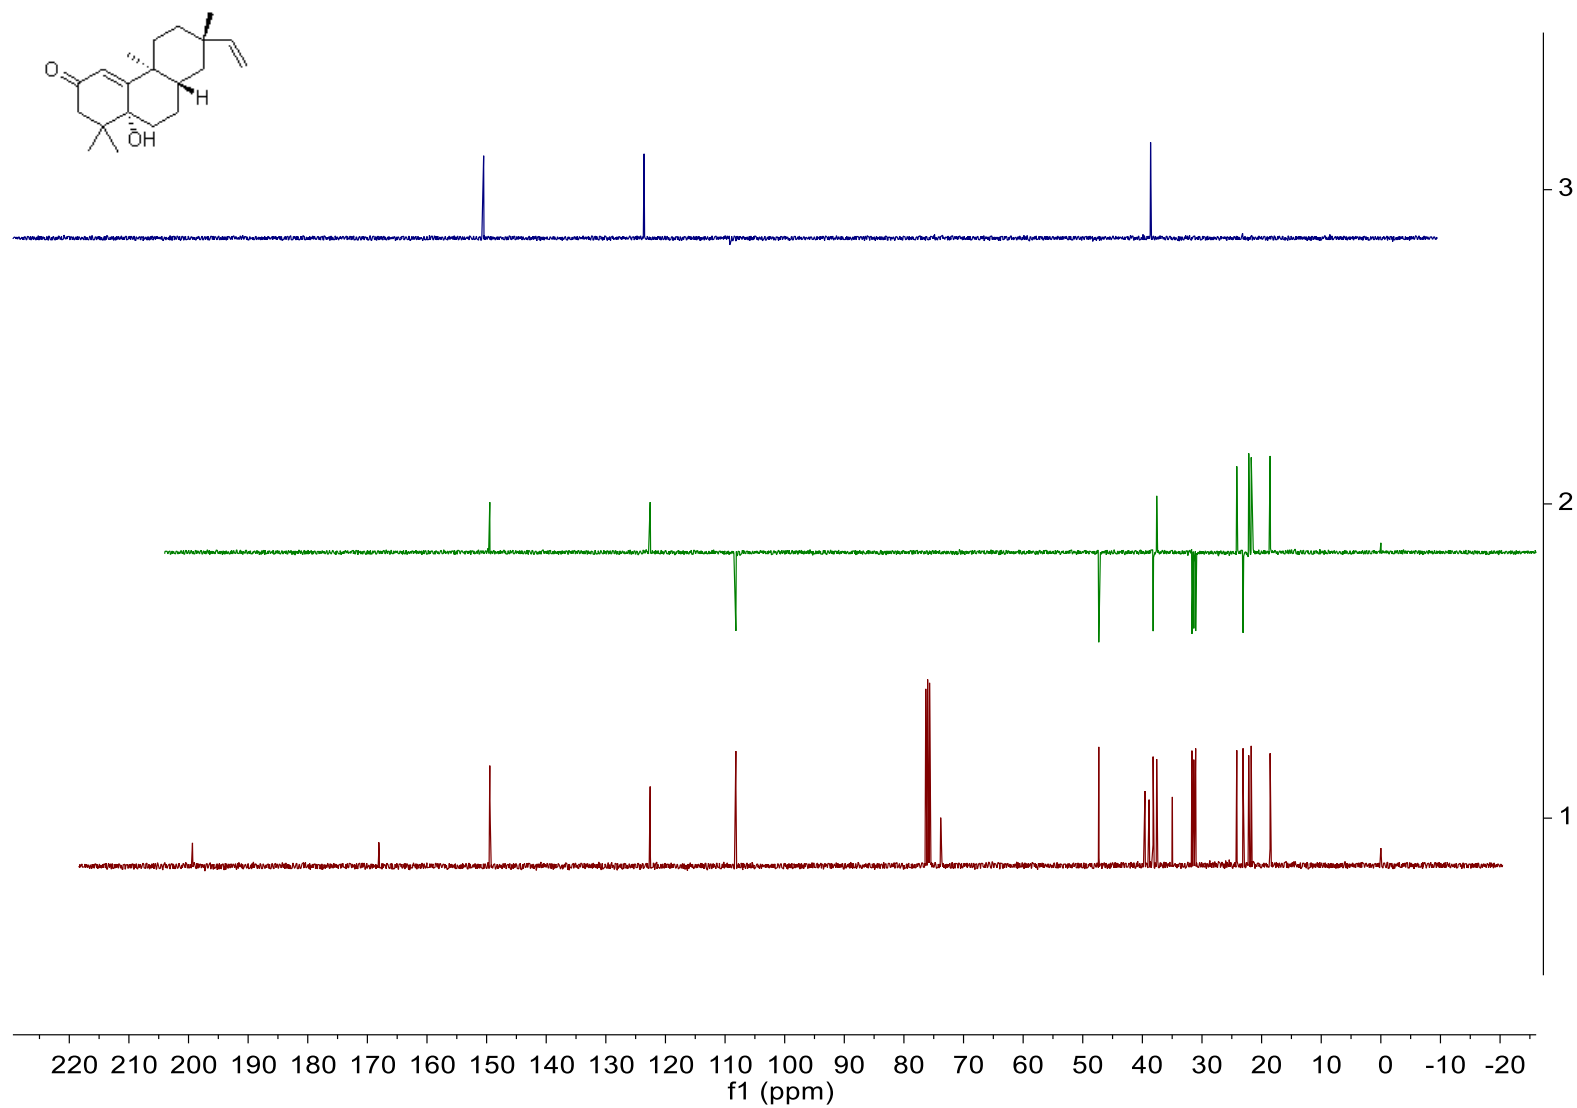

**Figure S76.** The  $^{13}\text{C}$  NMR Spectrum of Compound **10** in  $\text{CDCl}_3$

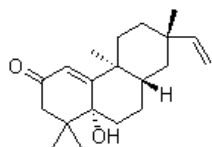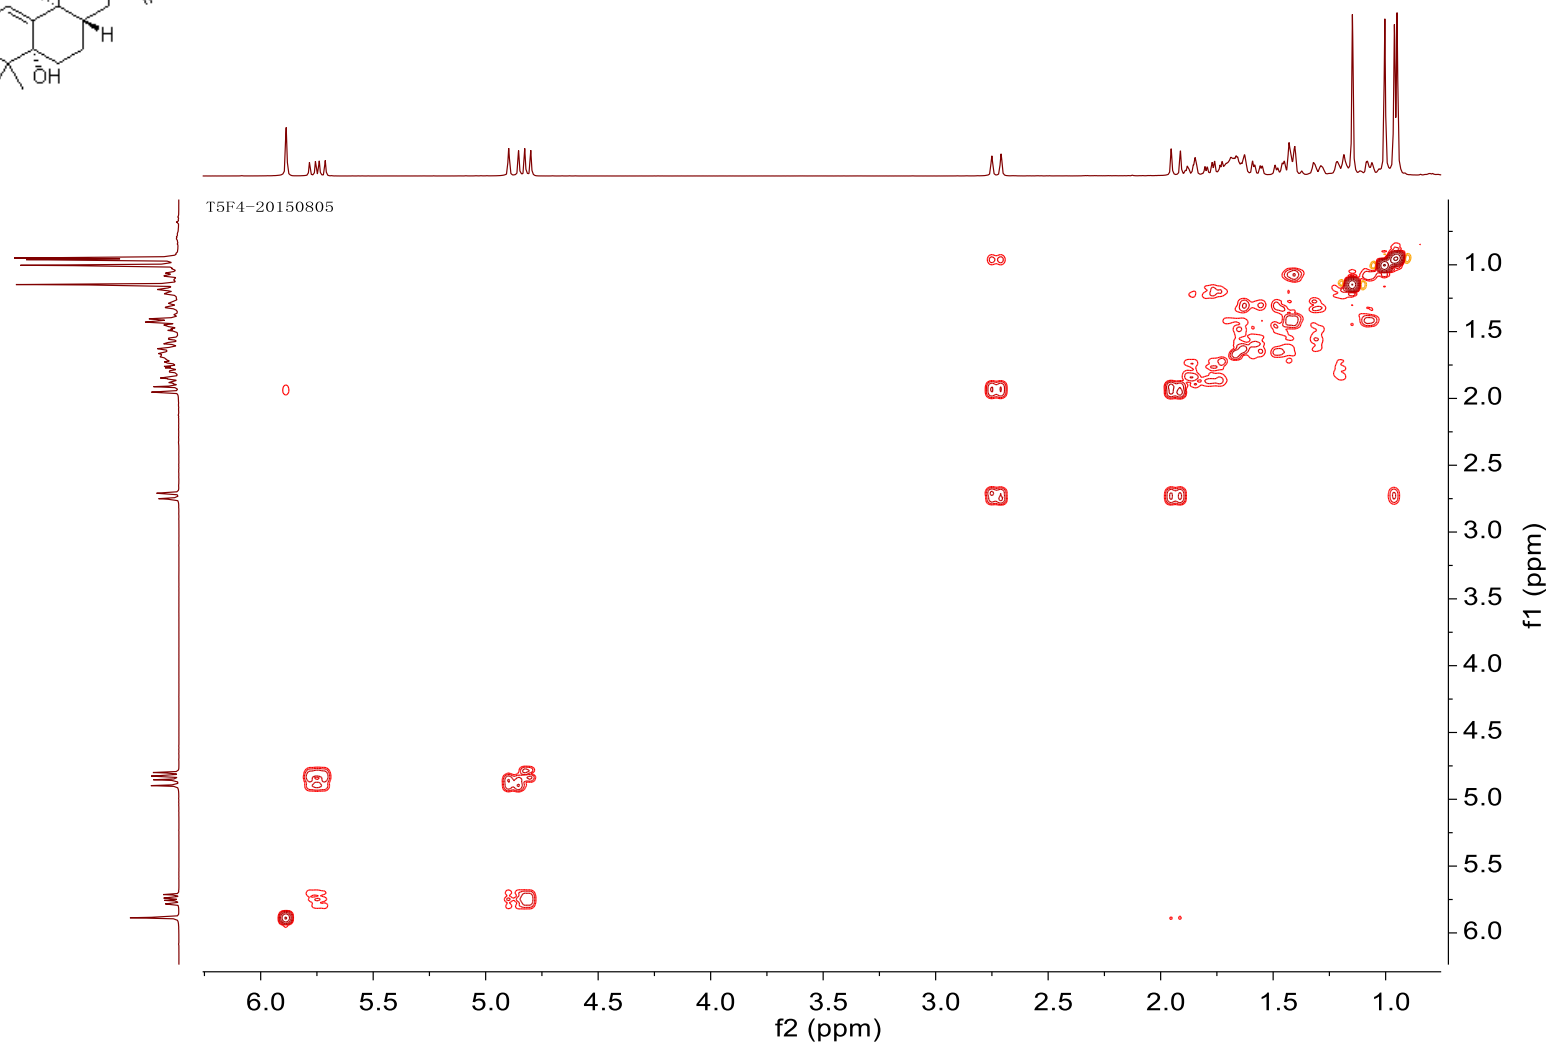

**Figure S77.** The  $^1\text{H}$ - $^1\text{H}$  COSY Spectrum of Compound **10** in  $\text{CDCl}_3$

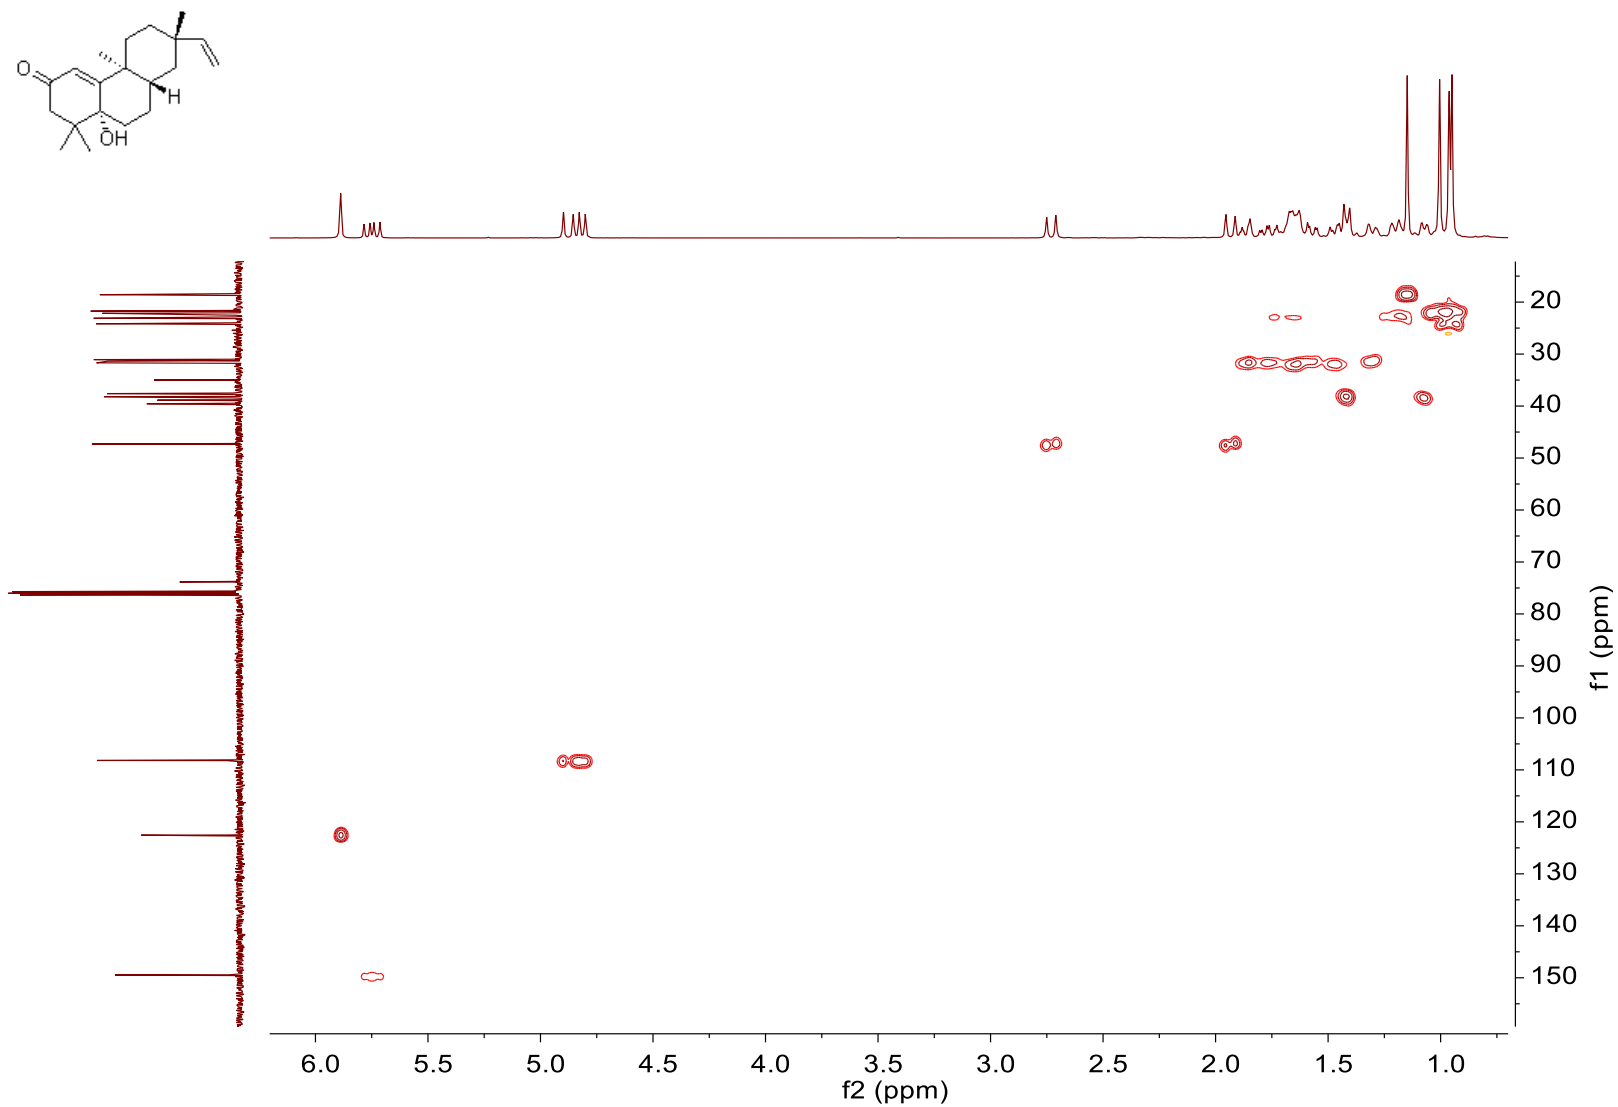

**Figure S78.** The HSQC Spectrum of Compound **10** in  $\text{CDCl}_3$

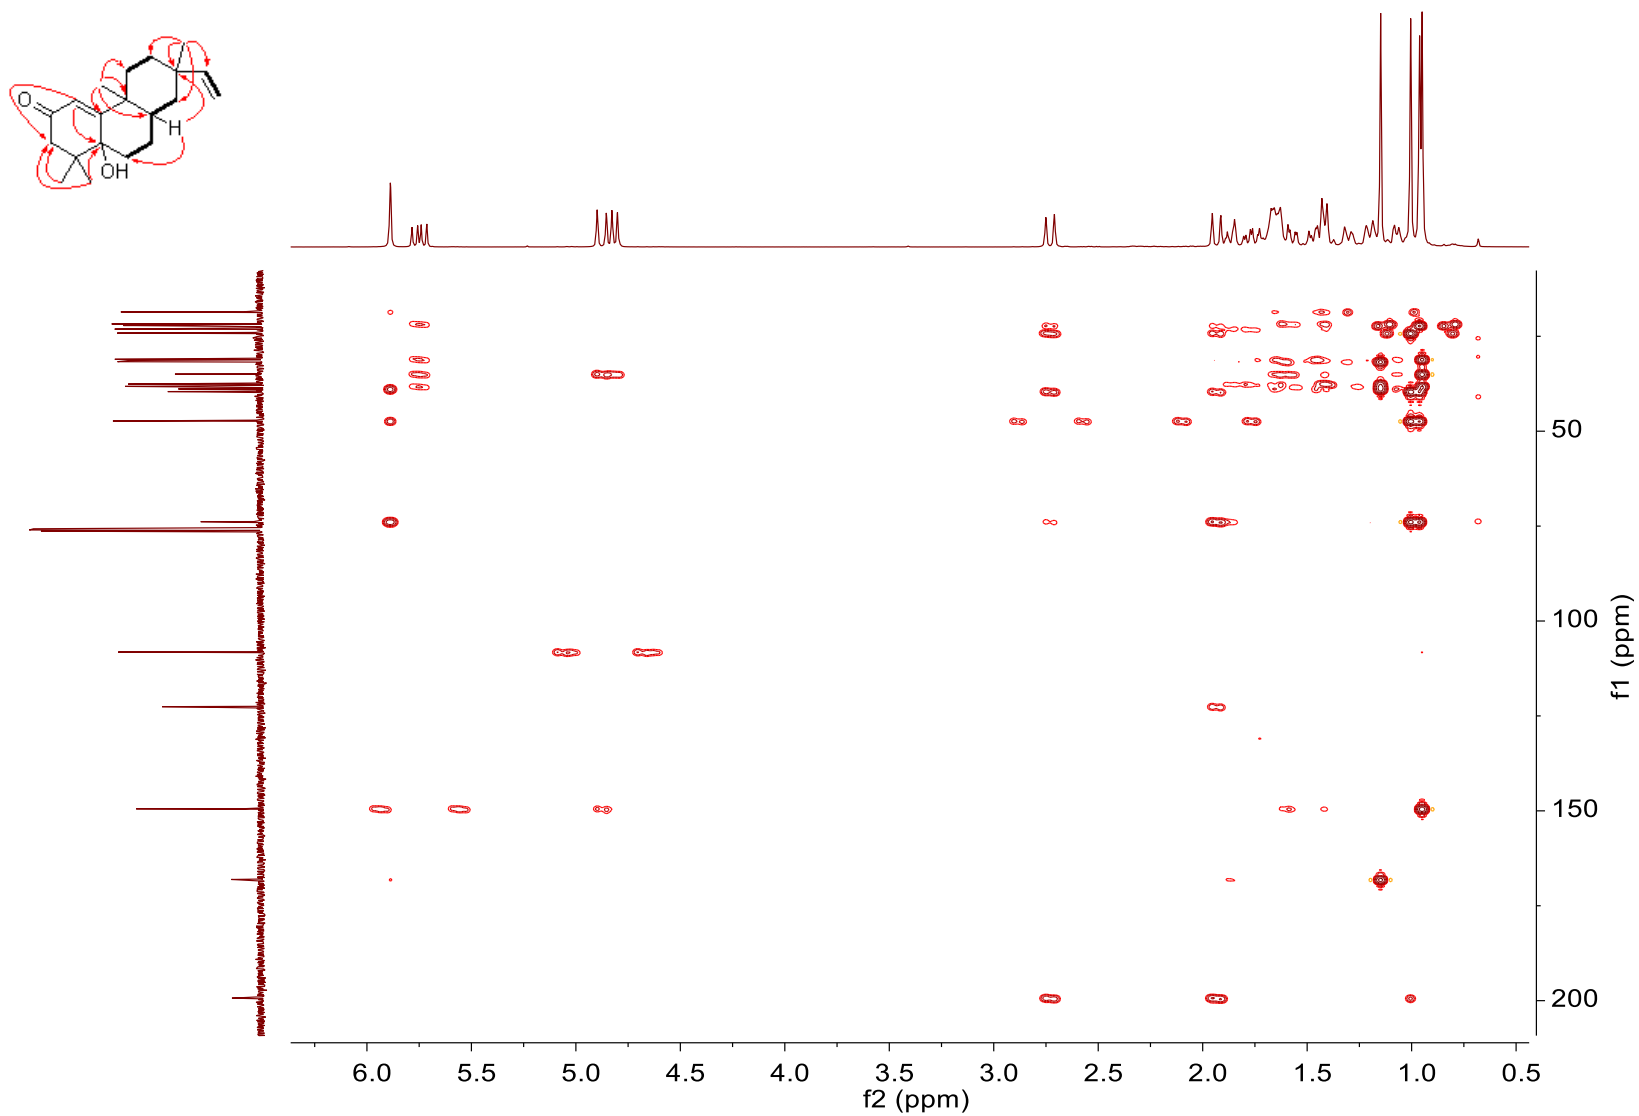

**Figure S79.** The HMBC Spectrum of Compound **10** in  $\text{CDCl}_3$



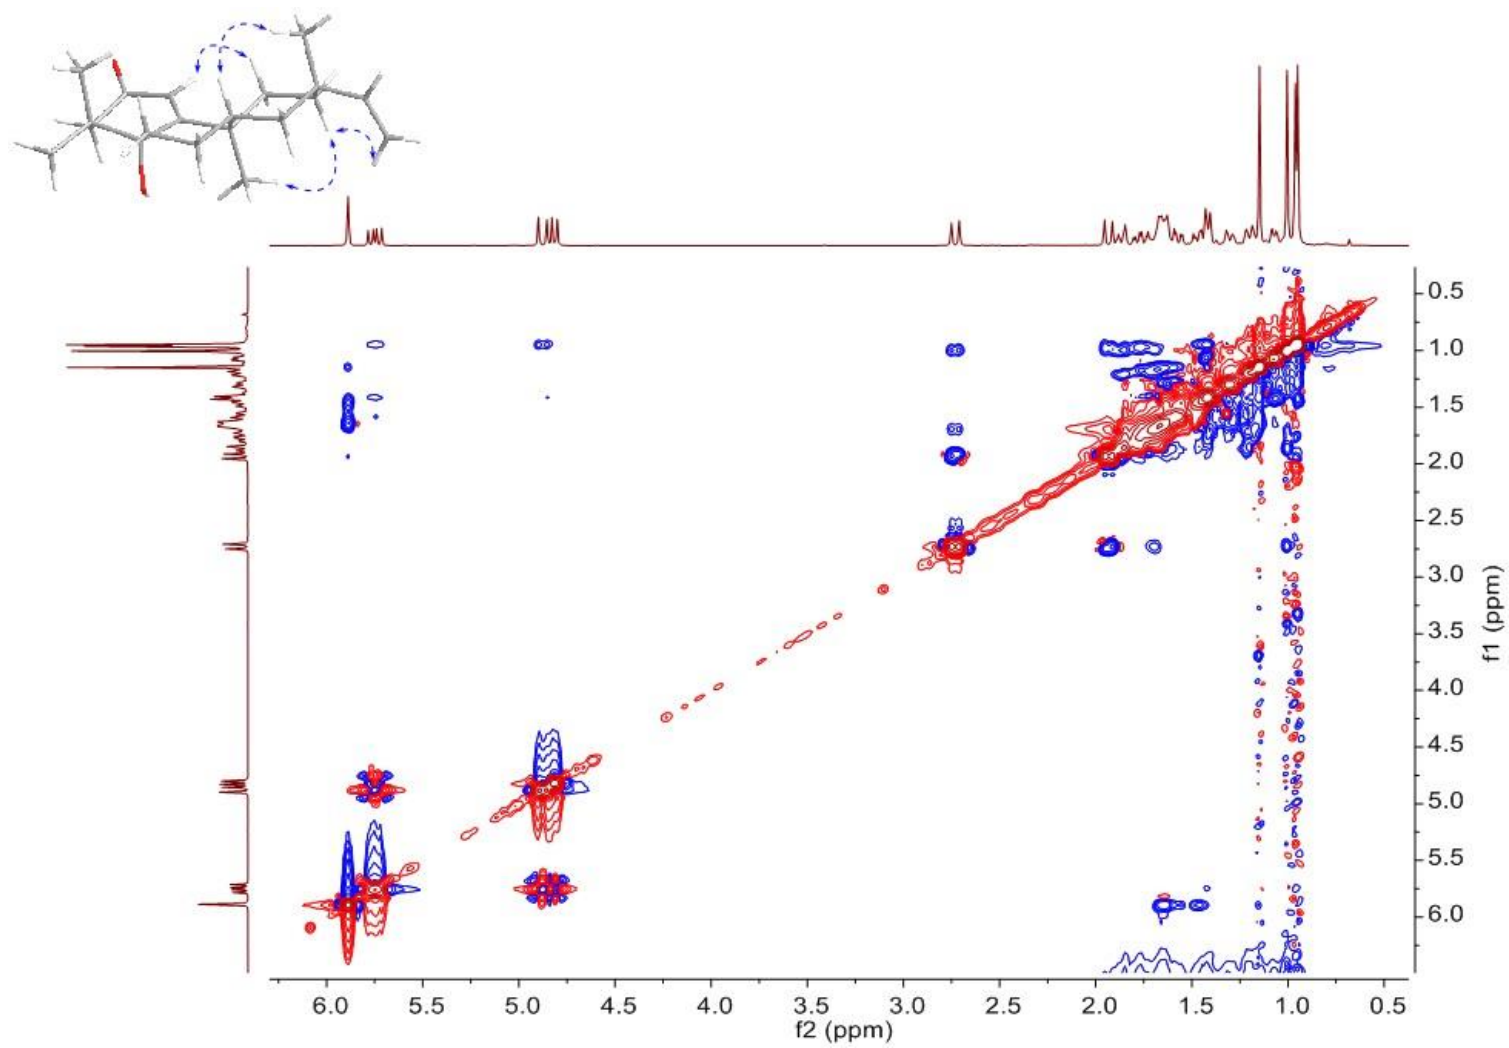

**Figure S80.** The NOESY Spectrum of Compound **10** in CDCl<sub>3</sub>

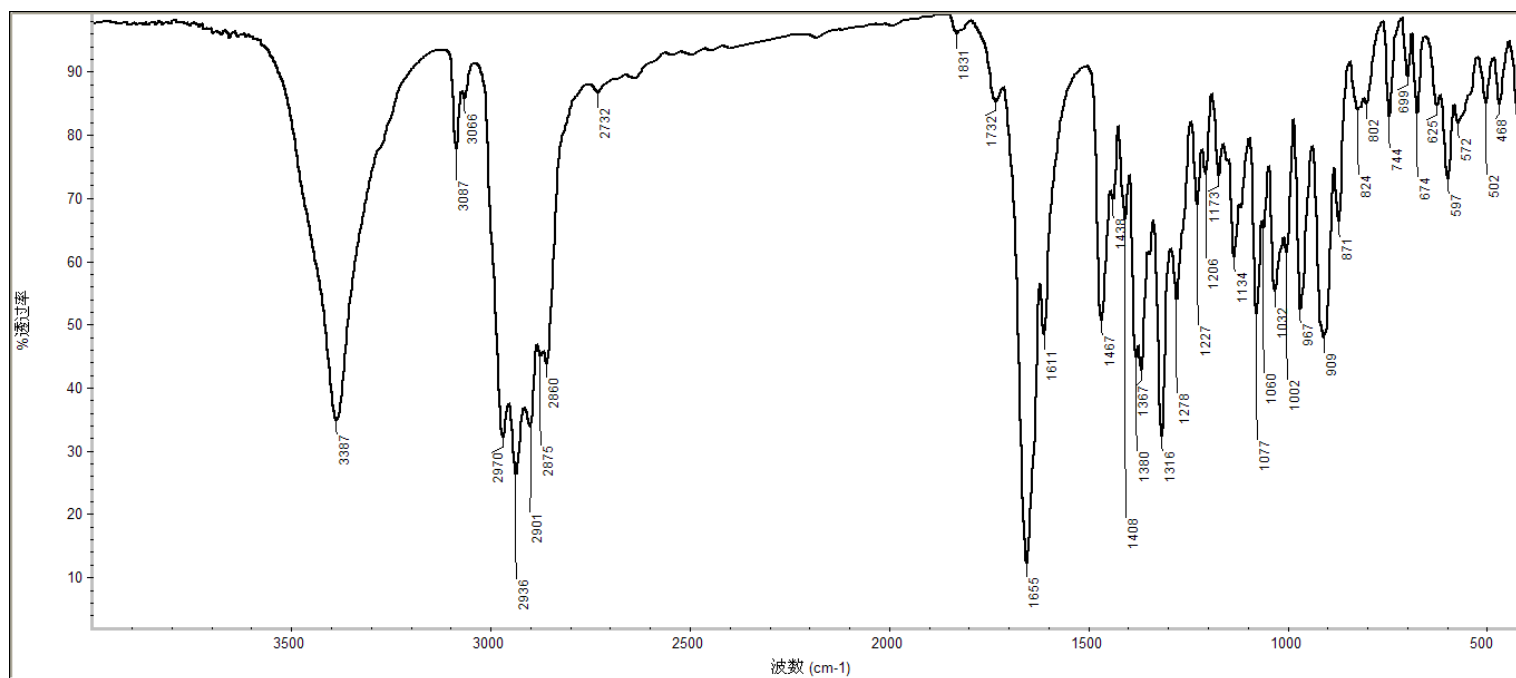

**Figure S81.** The IR Spectra of Compound **11**

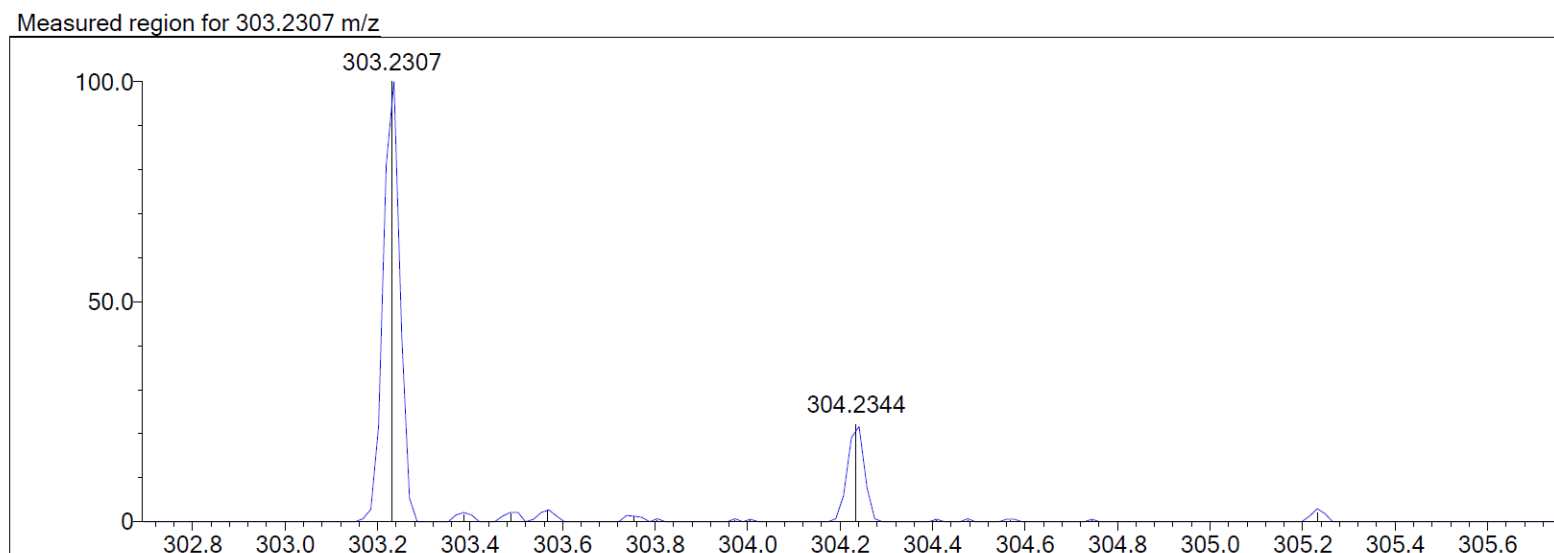


---

SPECTRUM -

simulation :

---

| m/z      | Theo. Mass | Delta (ppm) | RDB equiv. | Composition                                    |
|----------|------------|-------------|------------|------------------------------------------------|
| 303.2307 | 303.2319   | -3.96       | 6.0        | C <sub>20</sub> H <sub>31</sub> O <sub>2</sub> |

---

**Figure S82.** The HRESIMS Spectroscopic Data of Compound **11**

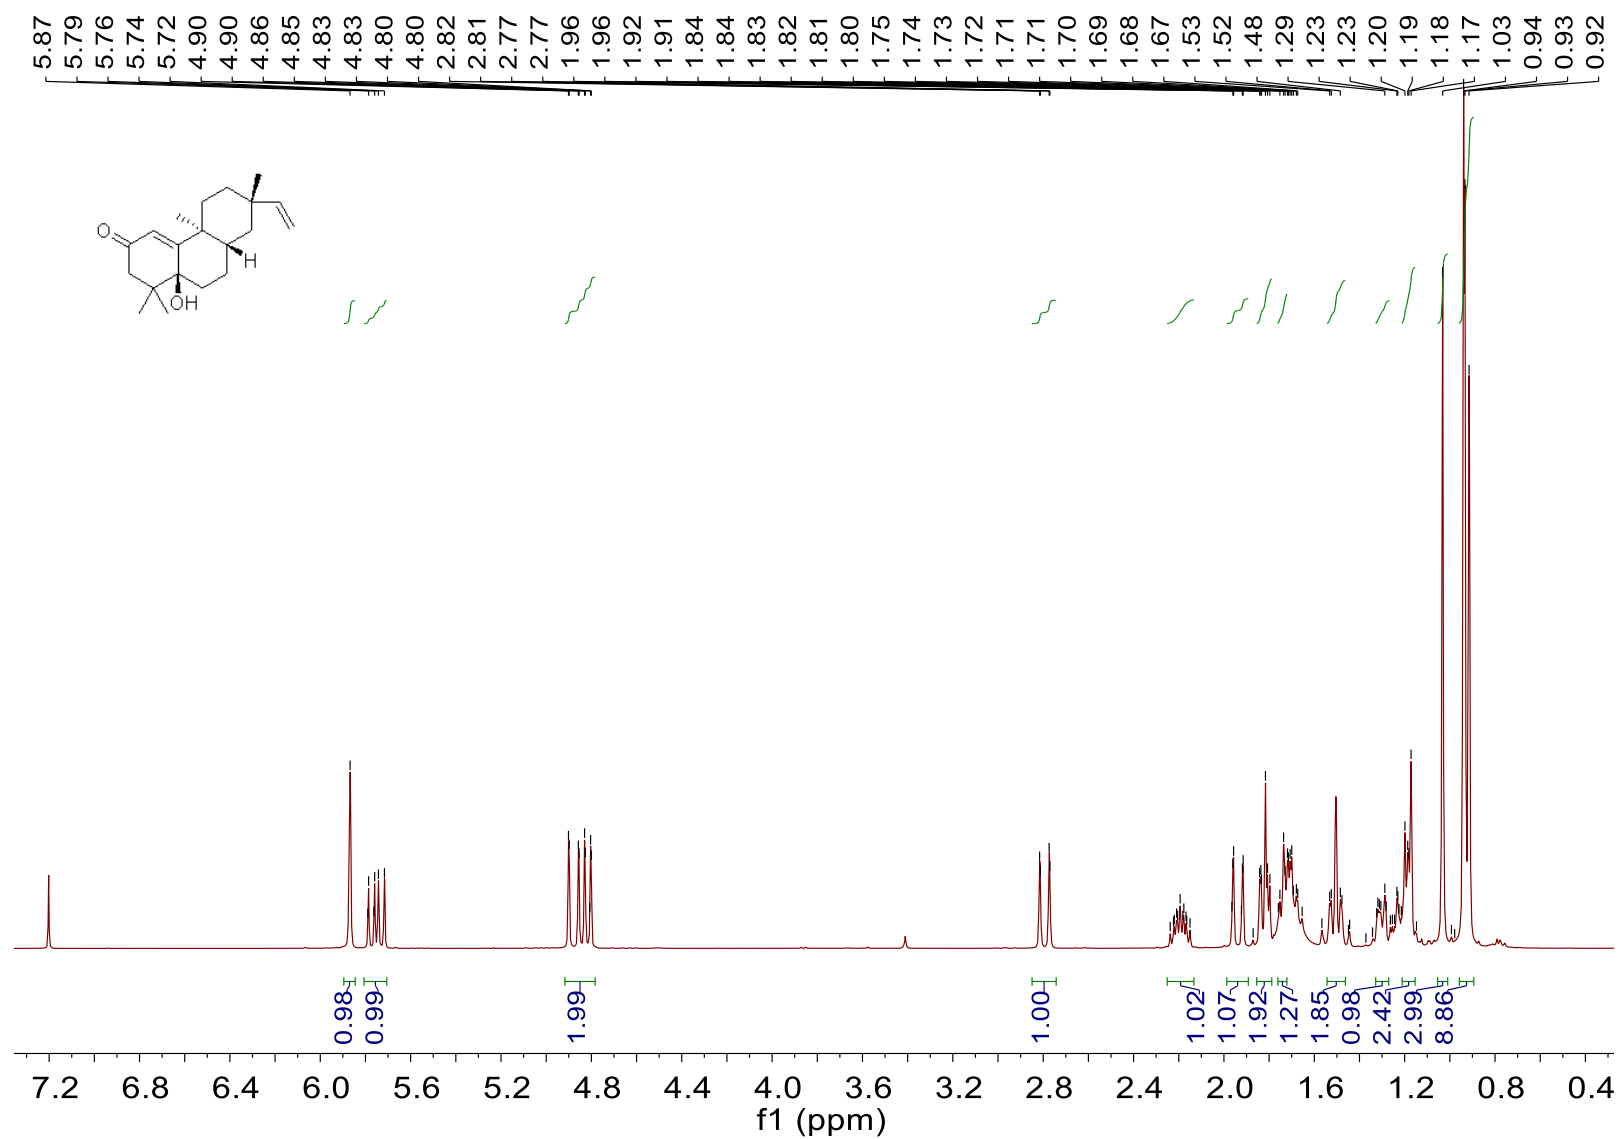

**Figure S83.** The <sup>1</sup>H NMR Spectrum of Compound **11** in CDCl<sub>3</sub>

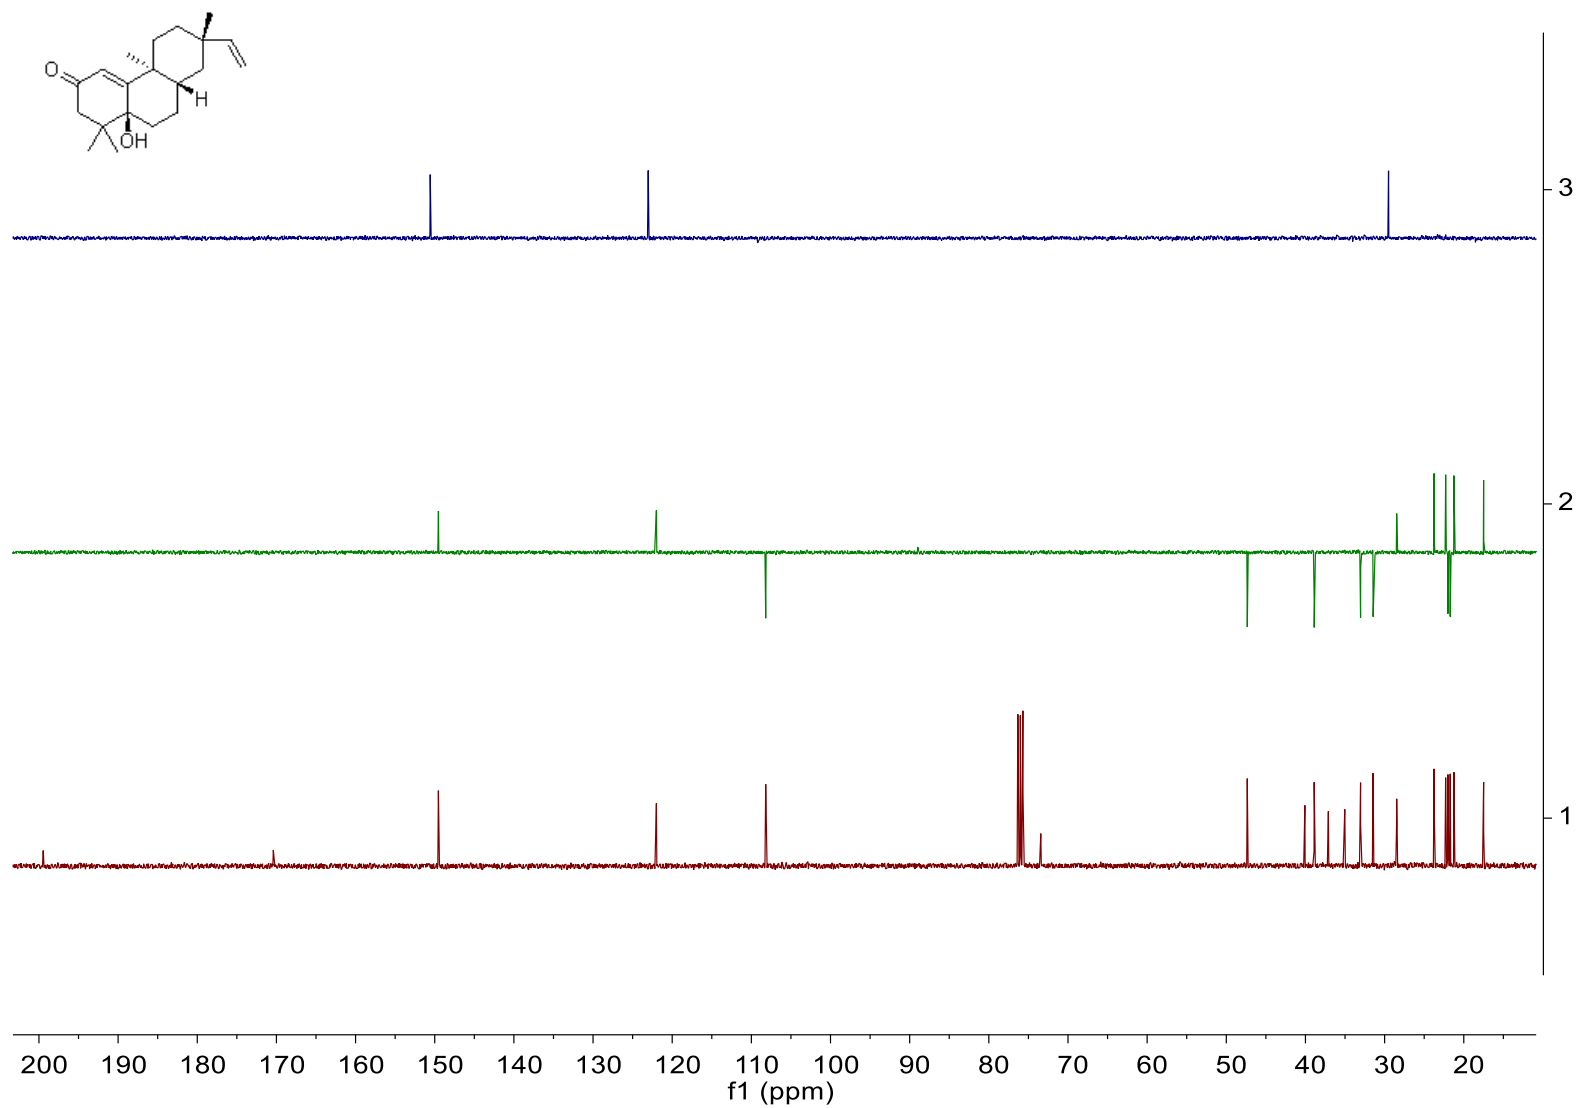

**Figure S84.** The  $^{13}\text{C}$  NMR Spectrum of Compound **11** in  $\text{CDCl}_3$

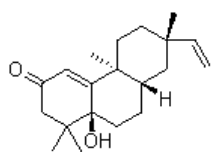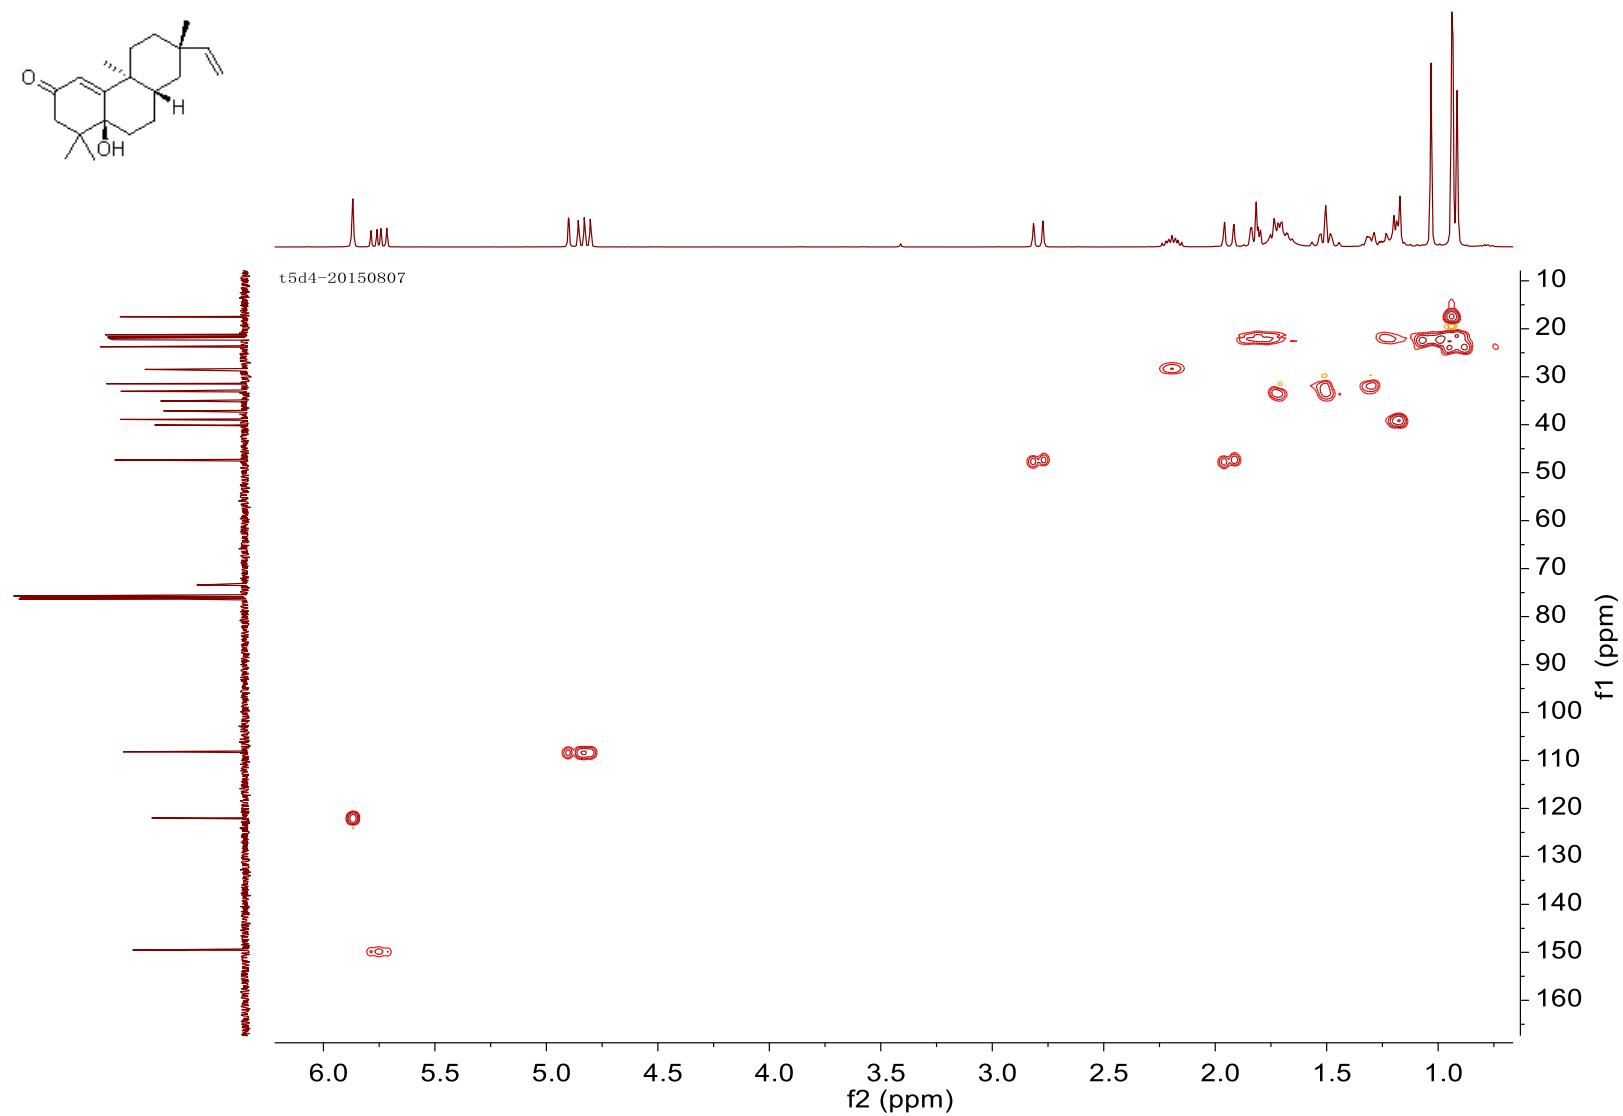

**Figure S85.** The  $^1\text{H}$ - $^1\text{H}$  COSY Spectrum of Compound **11** in  $\text{CDCl}_3$

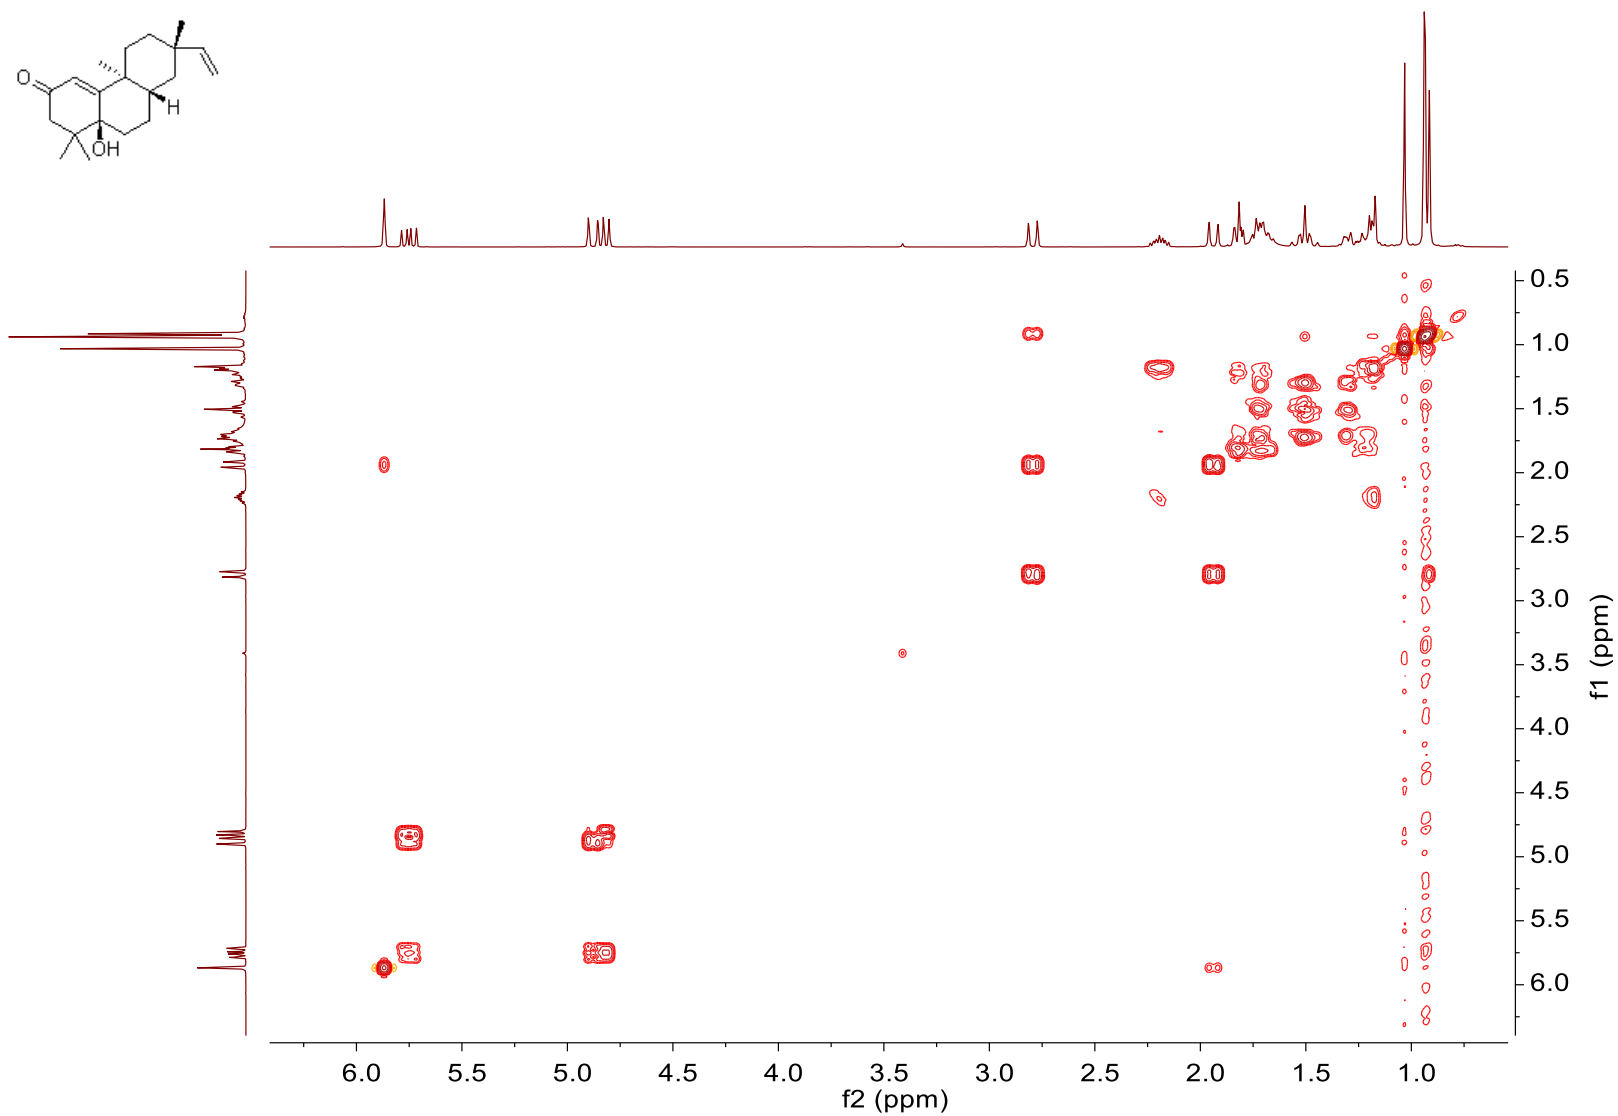

**Figure S86.** The HSQC Spectrum of Compound **11** in  $\text{CDCl}_3$

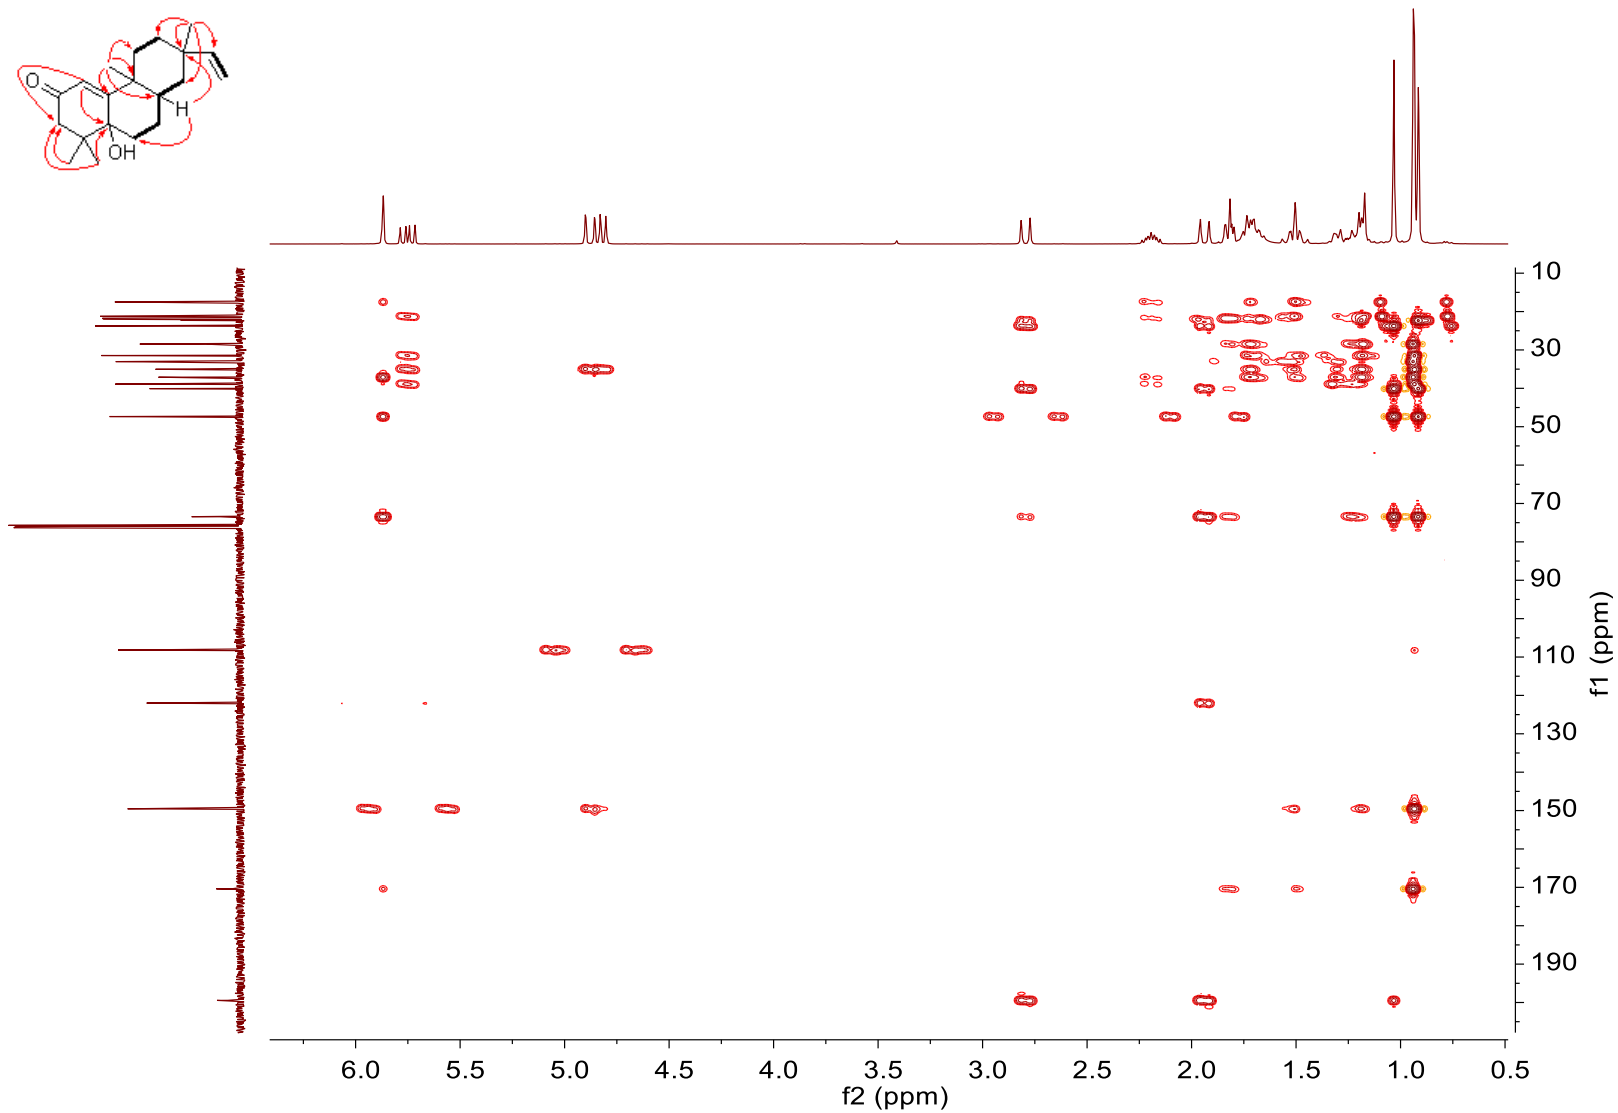

**Figure S87.** The HMBC Spectrum of Compound **11** in  $\text{CDCl}_3$



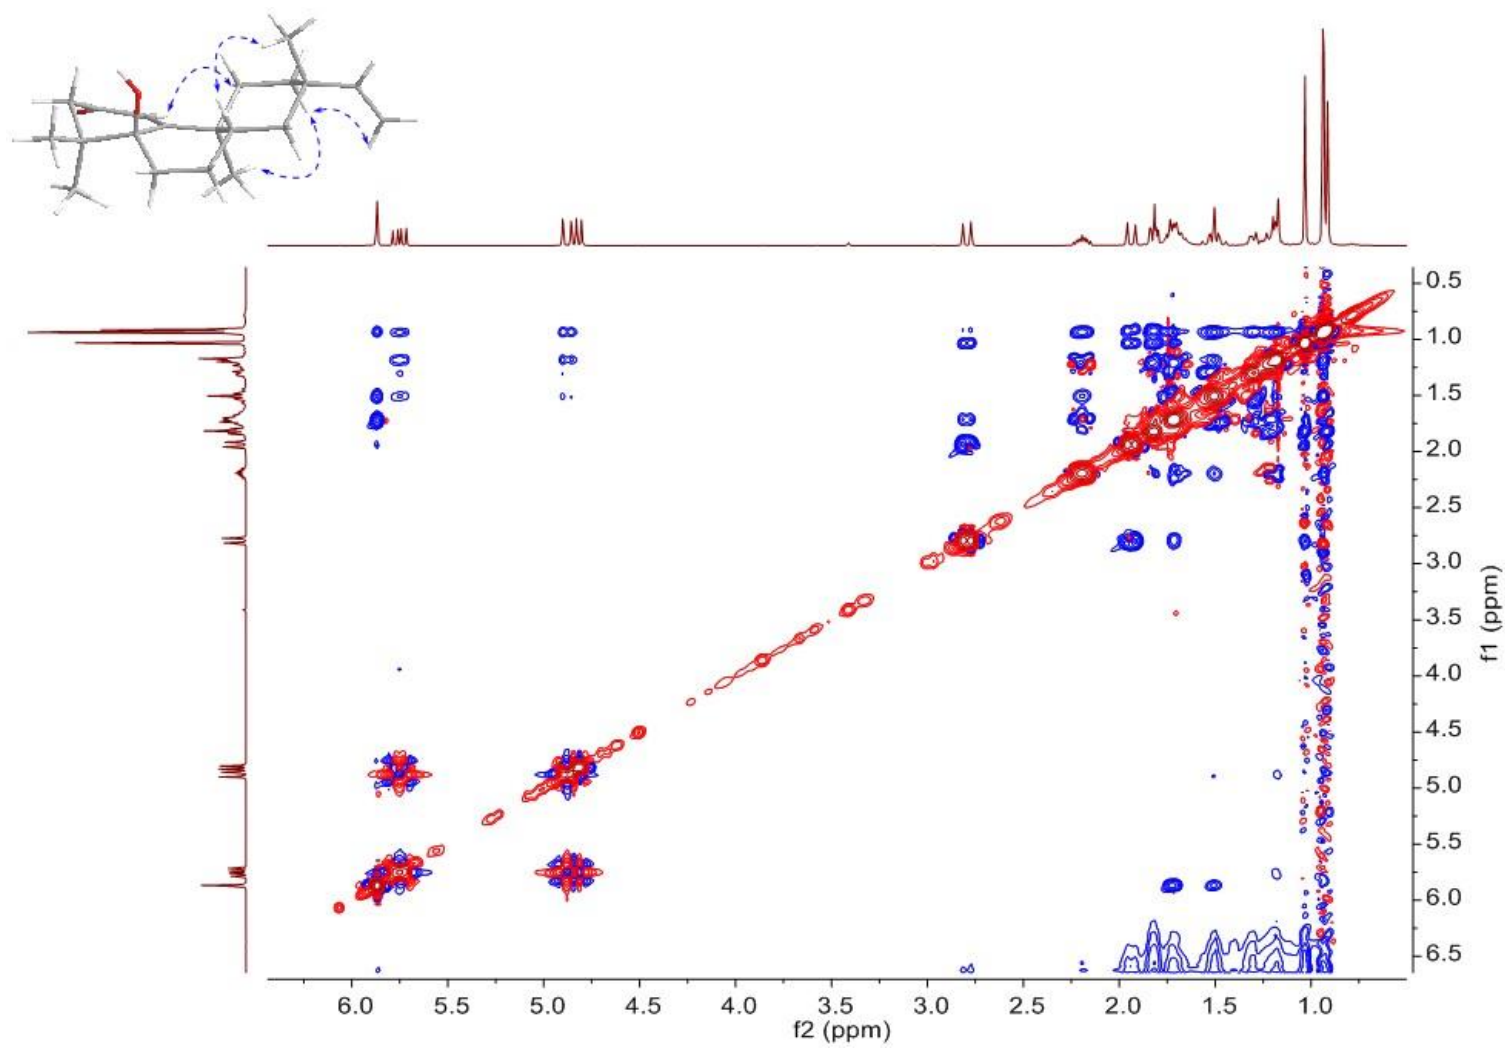

**Figure S88.** The NOESY Spectrum of Compound **11** in CDCl<sub>3</sub>

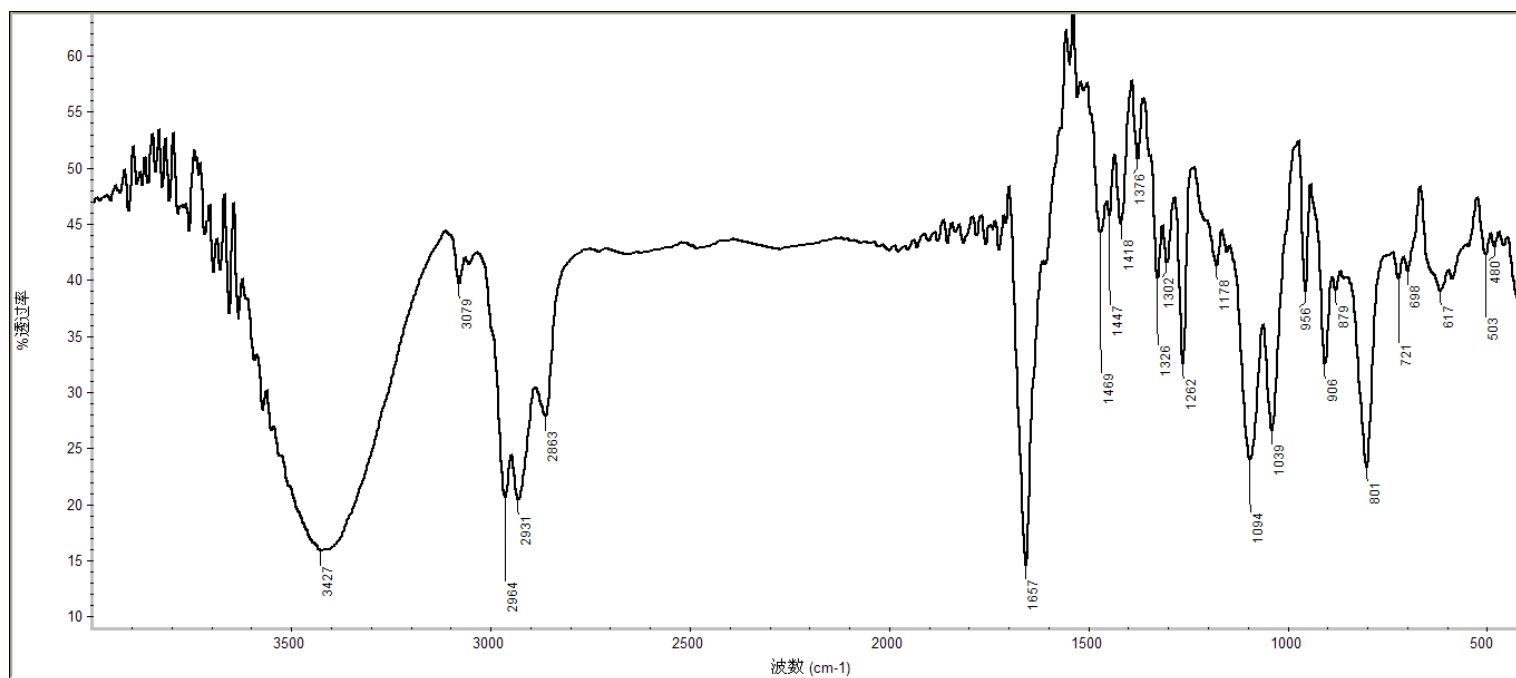

**Figure S89.** The IR Spectra of Compound **12**

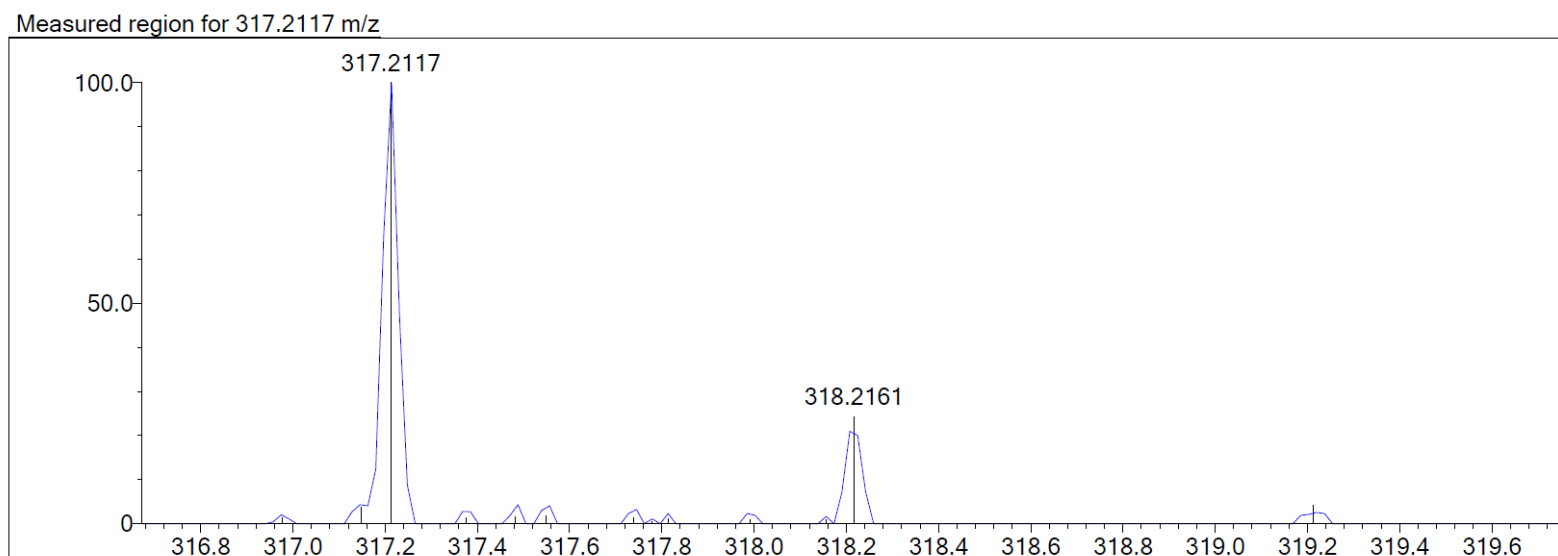


---

SPECTRUM -

simulation :

---

| m/z      | Theo. Mass | Delta (ppm) | RDB equiv. | Composition                                    |
|----------|------------|-------------|------------|------------------------------------------------|
| 317.2117 | 317.2122   | -1.58       | 6.0        | C <sub>20</sub> H <sub>29</sub> O <sub>3</sub> |

---

**Figure S90.** The HRESIMS Spectroscopic Data of Compound **12**

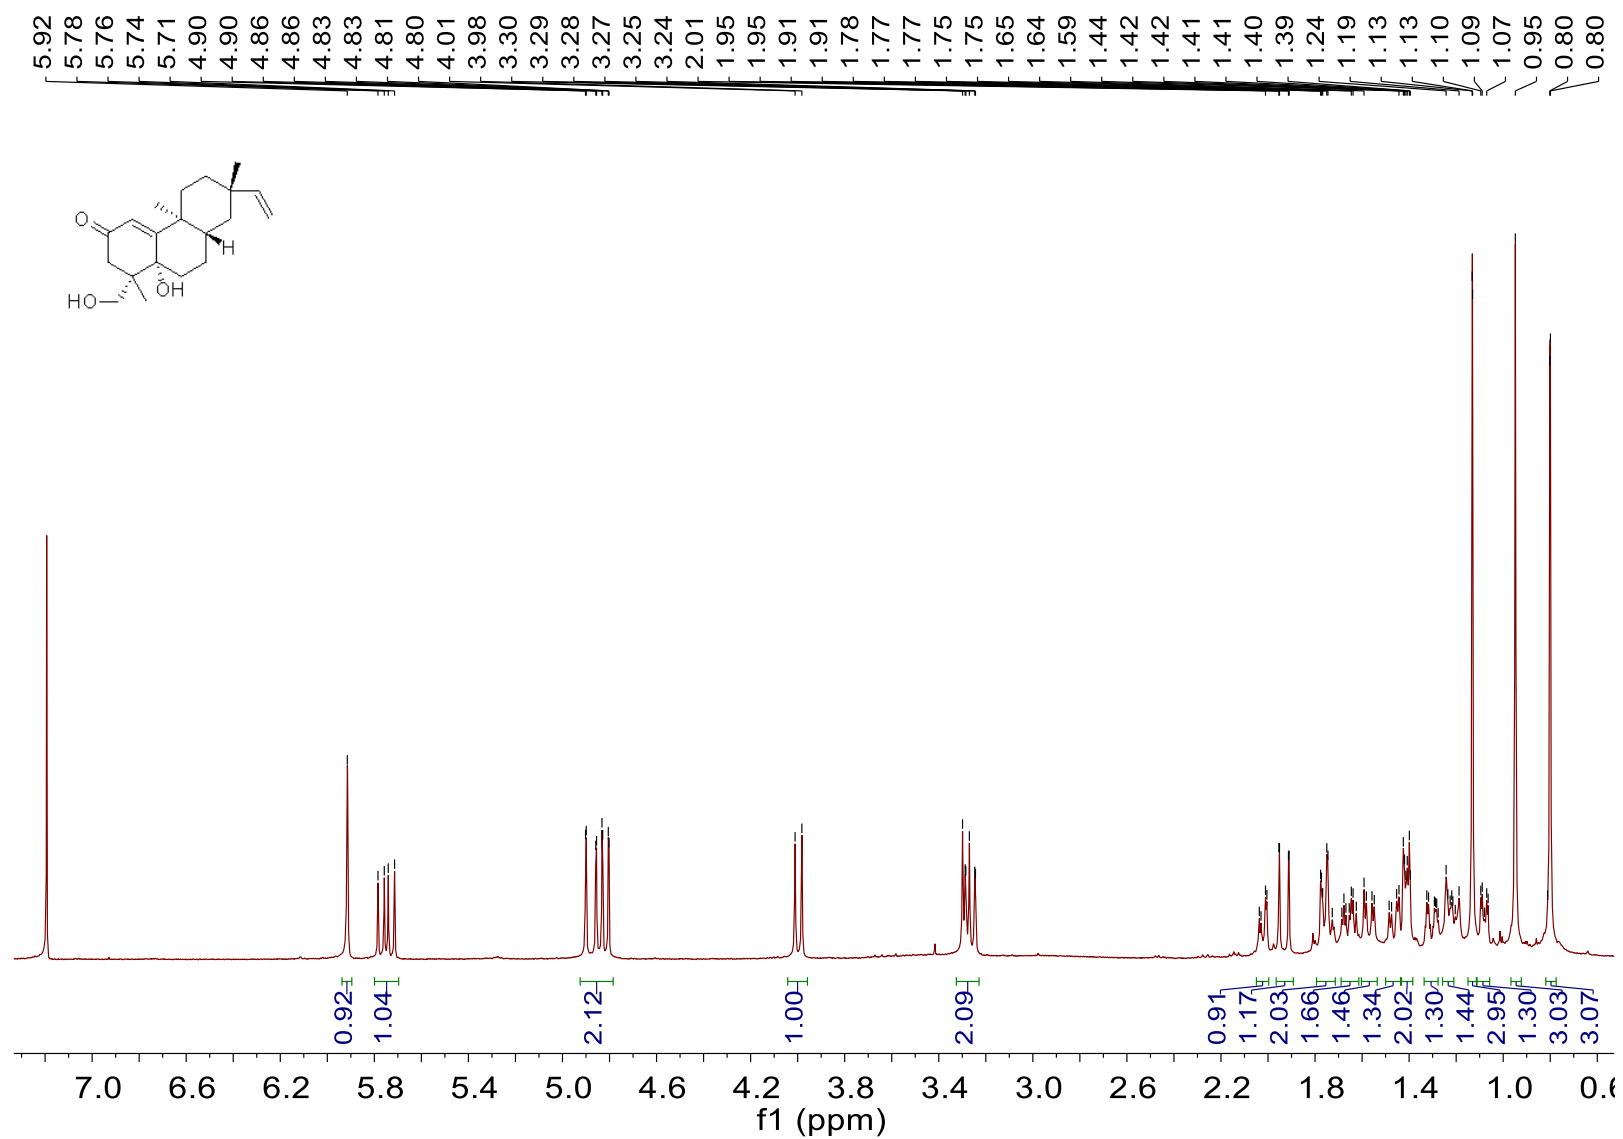

**Figure S91.** The <sup>1</sup>H NMR Spectrum of Compound **12** in CDCl<sub>3</sub>

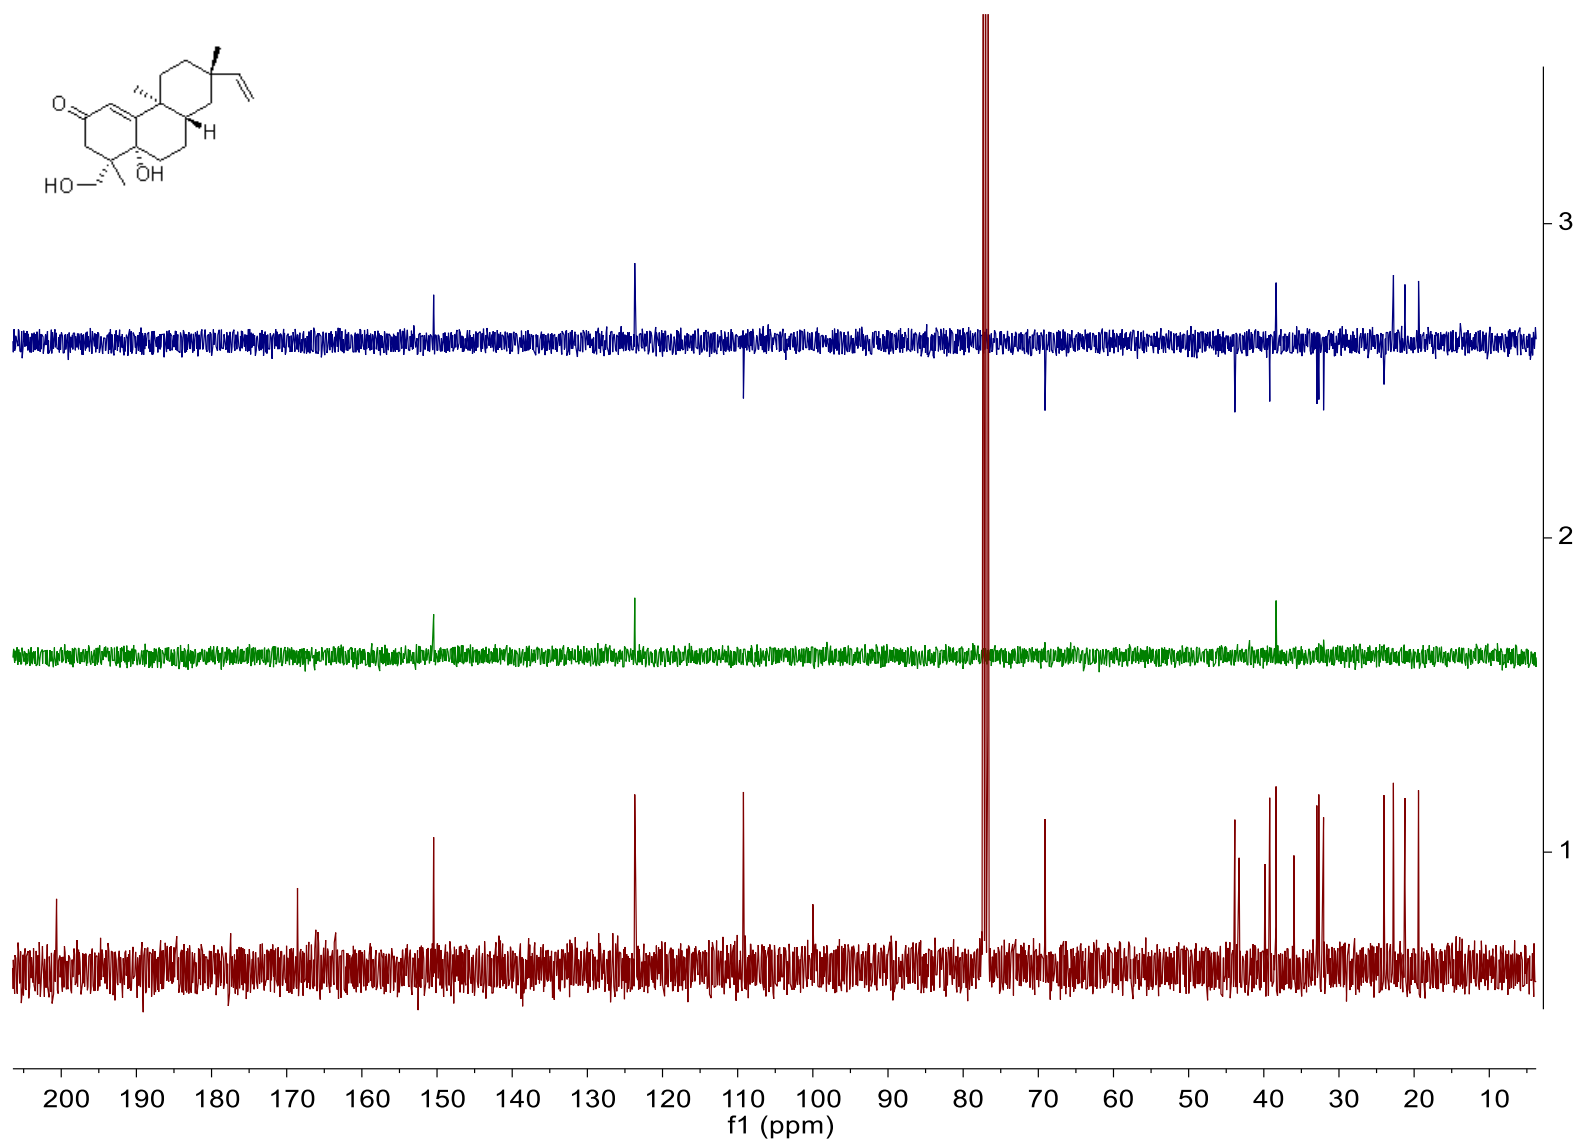

**Figure S92.** The  $^{13}\text{C}$  NMR Spectrum of Compound **12** in  $\text{CDCl}_3$

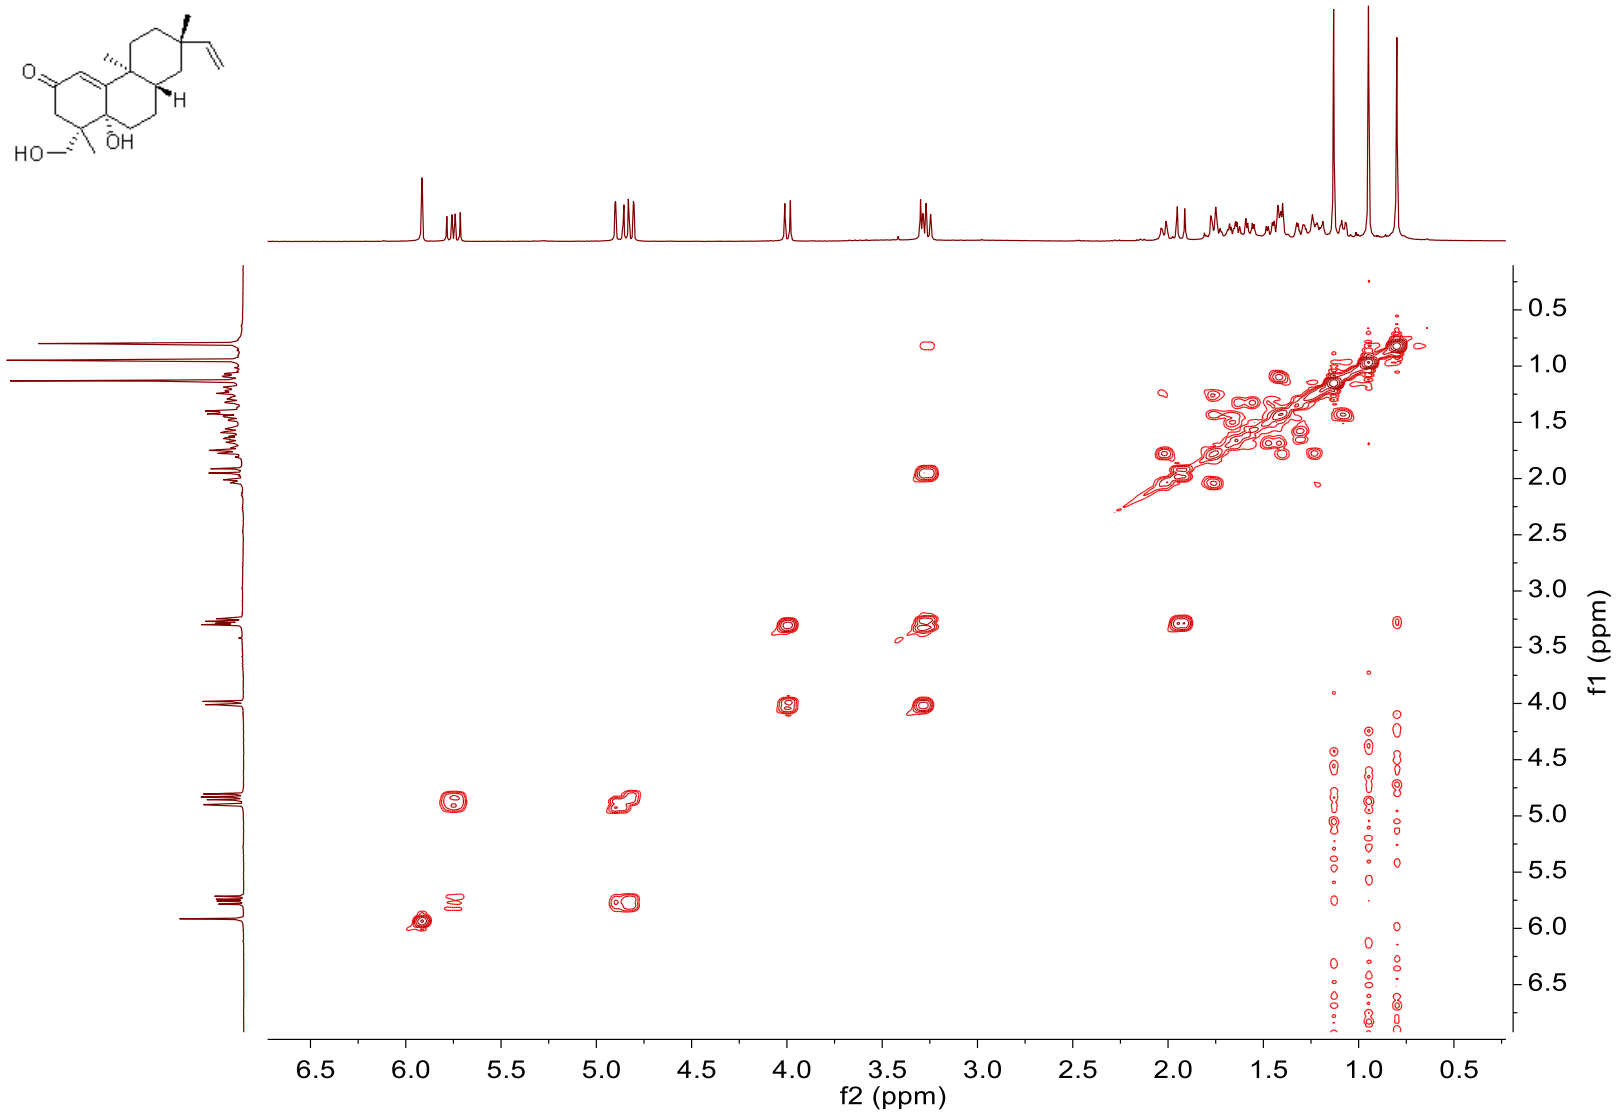

**Figure S93.** The  $^1\text{H}$ - $^1\text{H}$  COSY Spectrum of Compound 12 in  $\text{CDCl}_3$

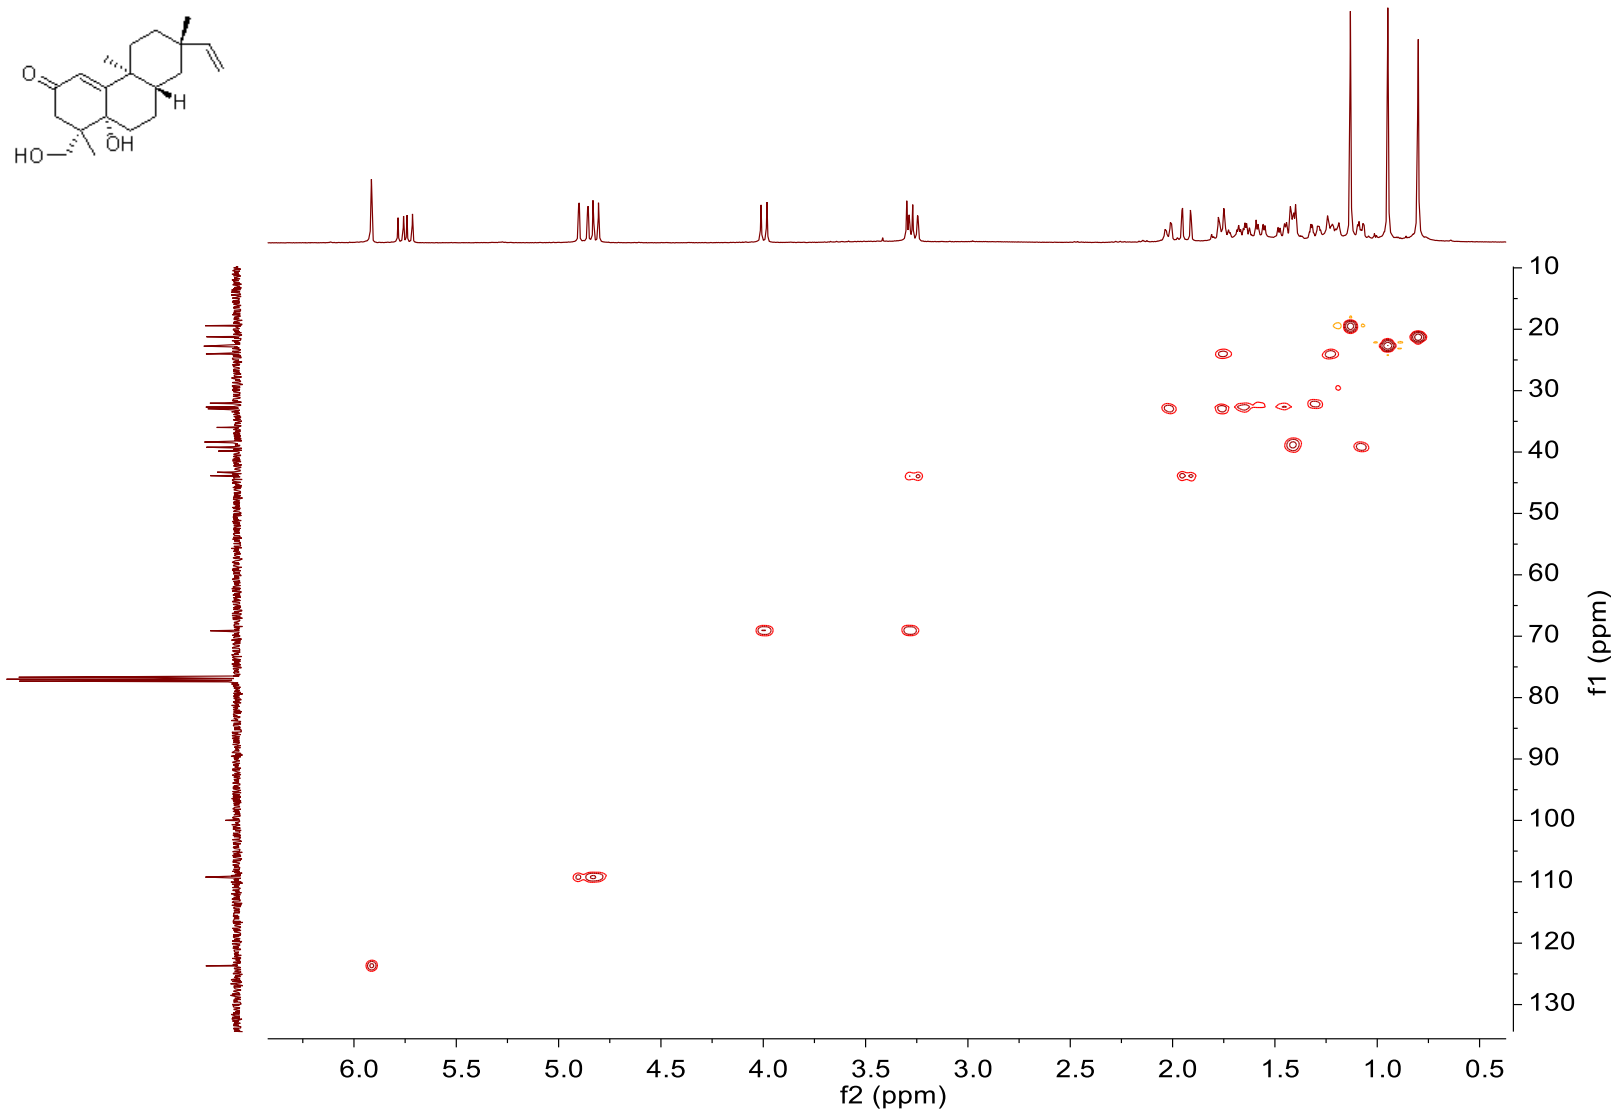

**Figure S94.** The HSQC Spectrum of Compound **12** in  $\text{CDCl}_3$

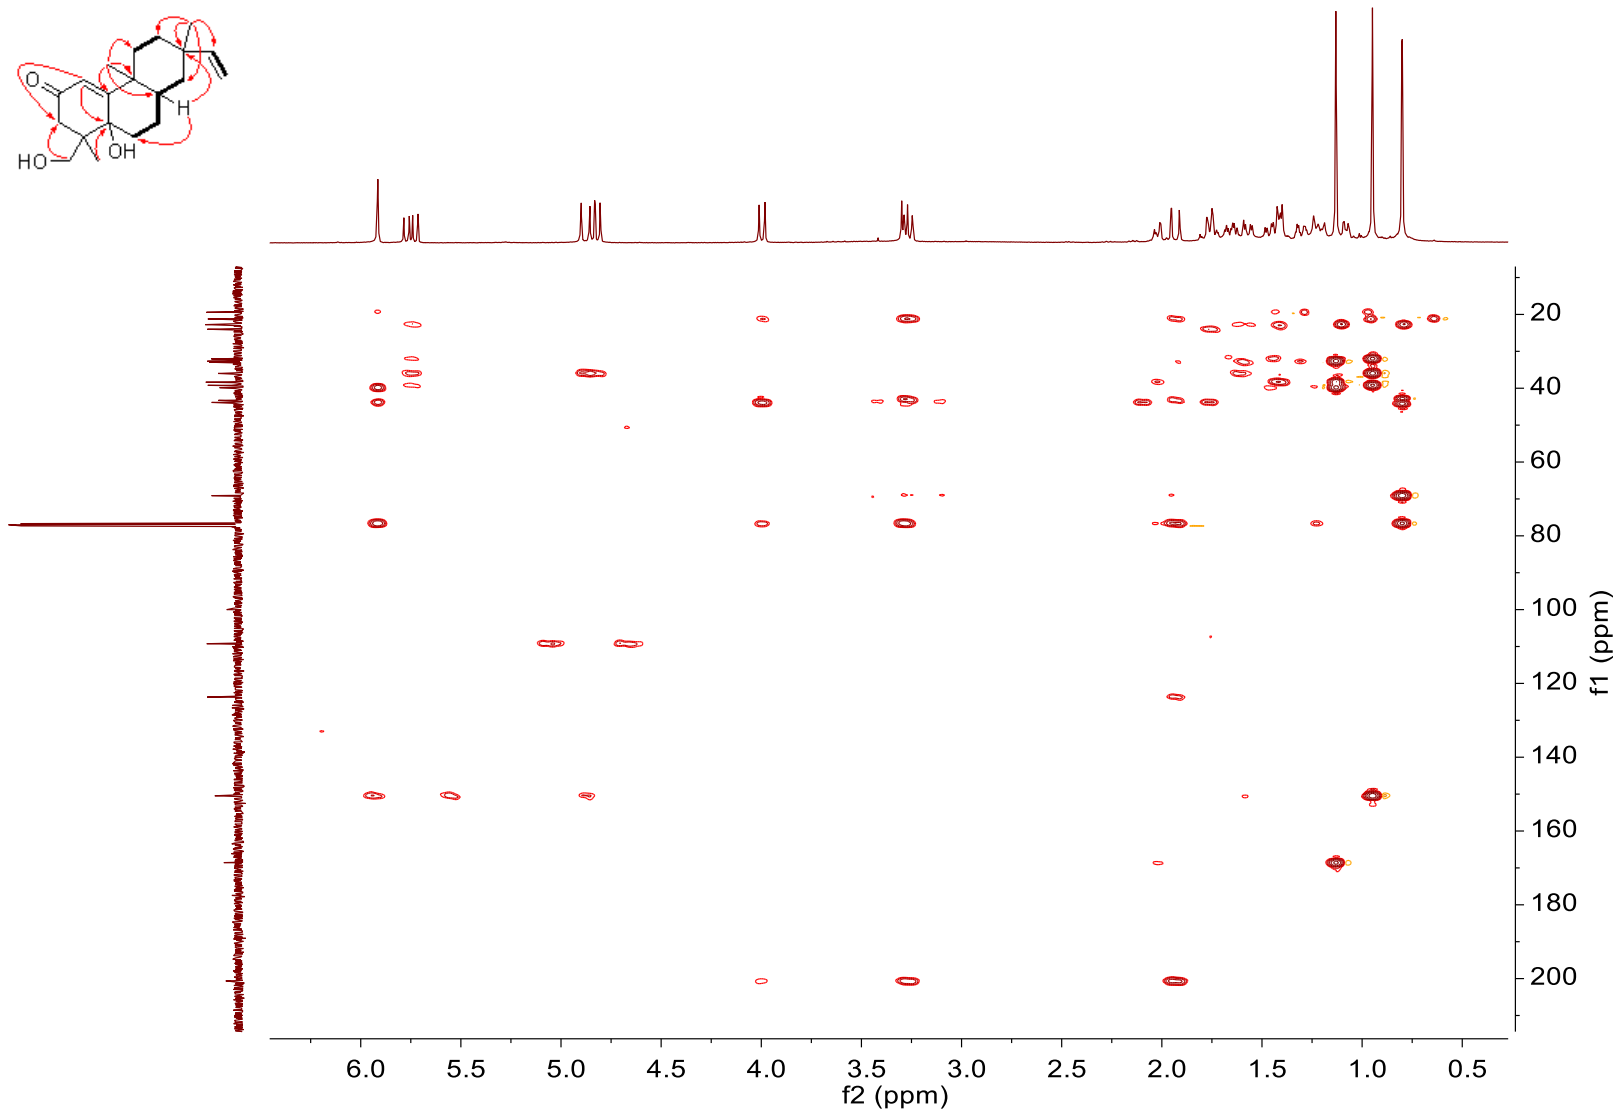

**Figure S95.** The HMBC Spectrum of Compound **12** in  $\text{CDCl}_3$



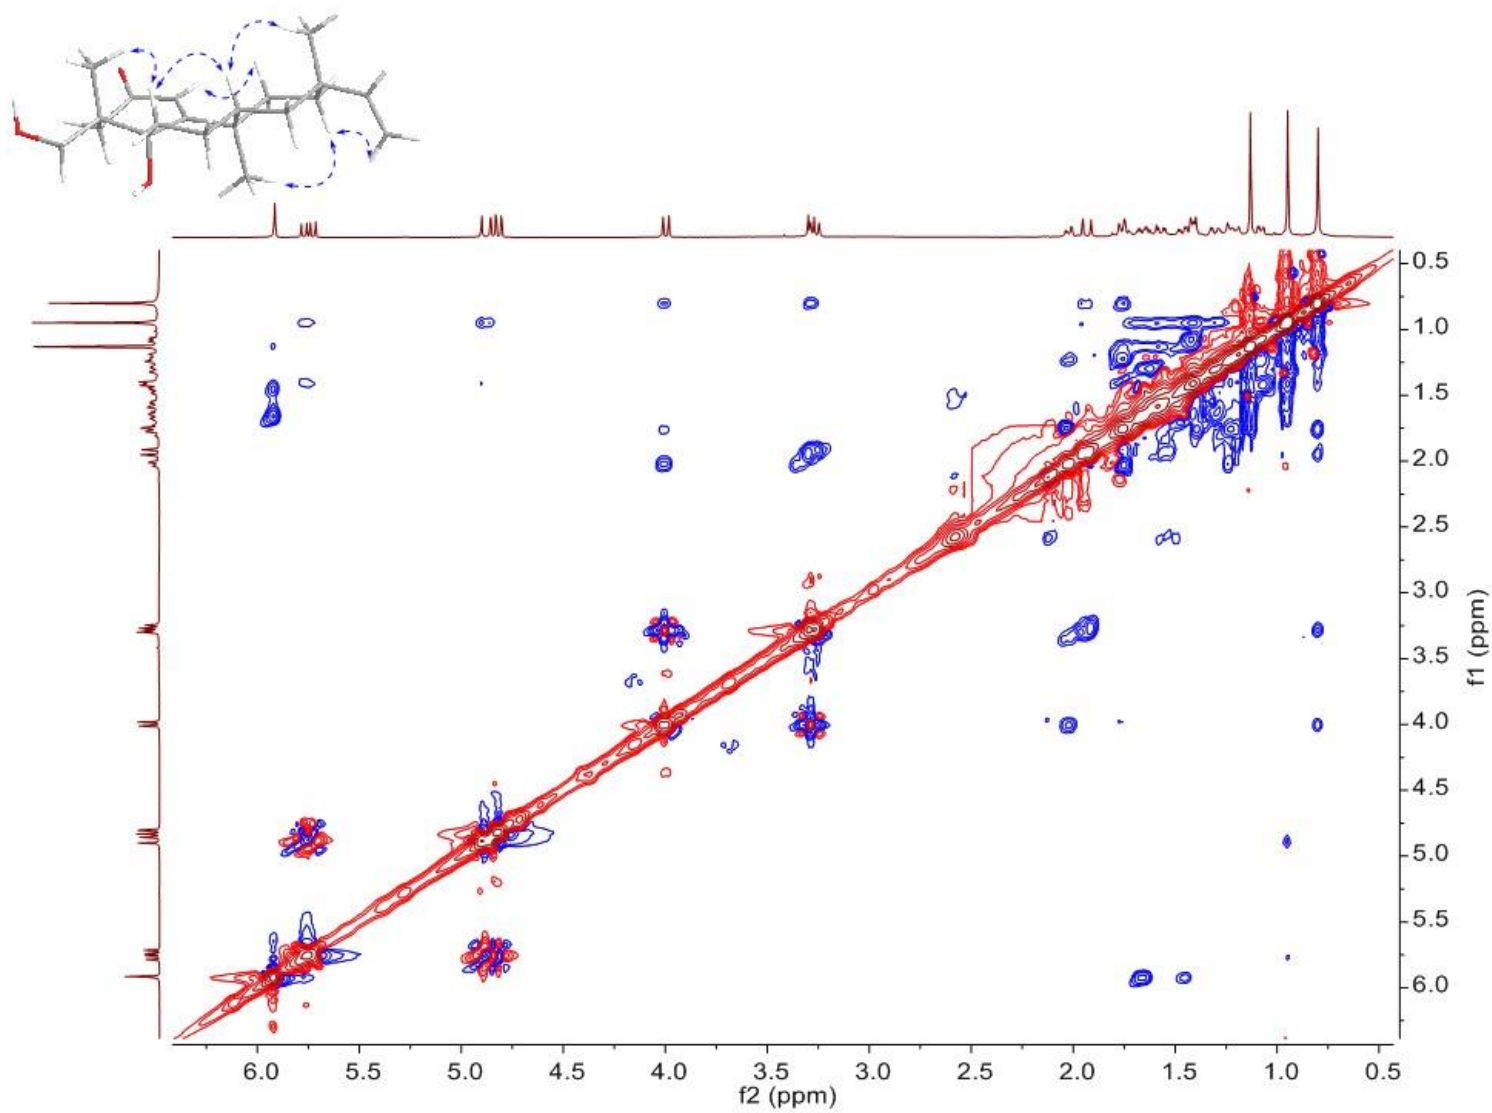

**Figure S96.** The NOESY Spectrum of Compound **12** in CDCl<sub>3</sub>

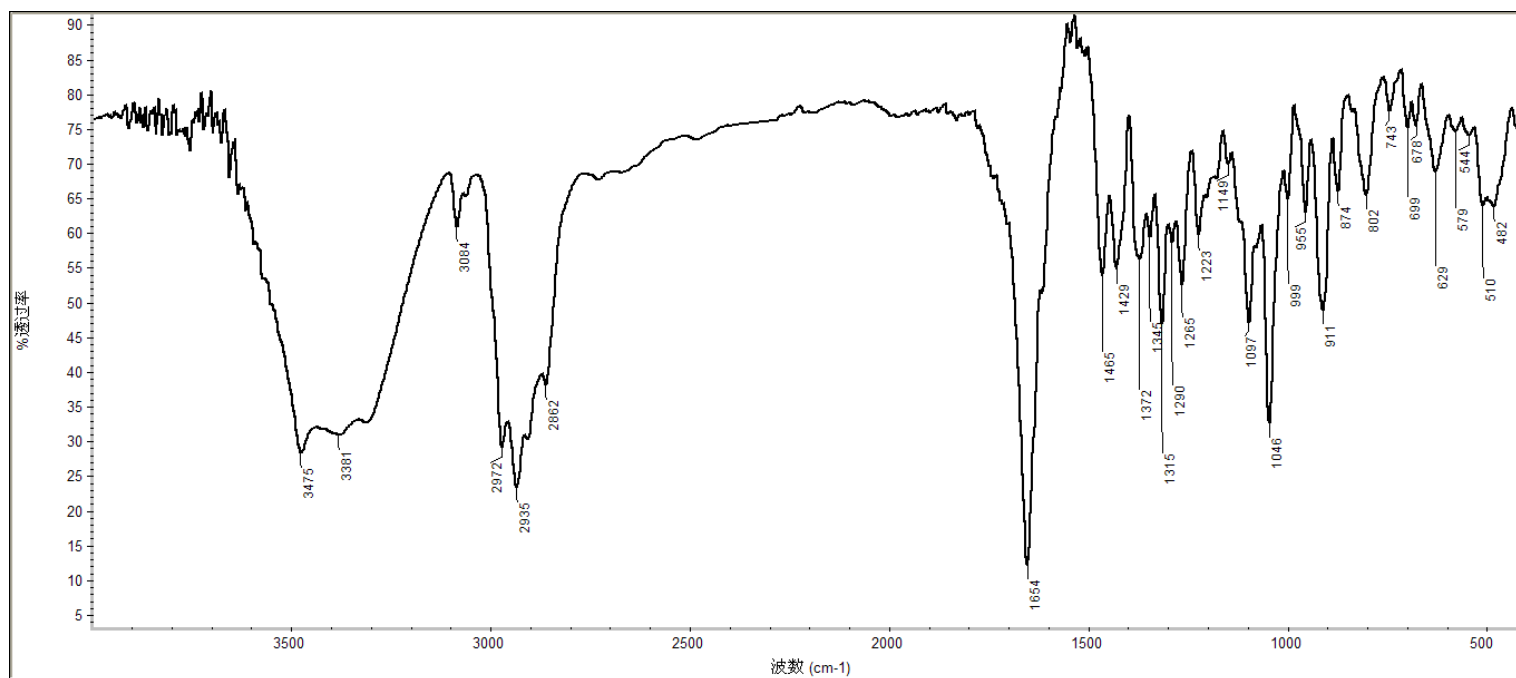

**Figure S97.** The IR Spectra of Compound **13**

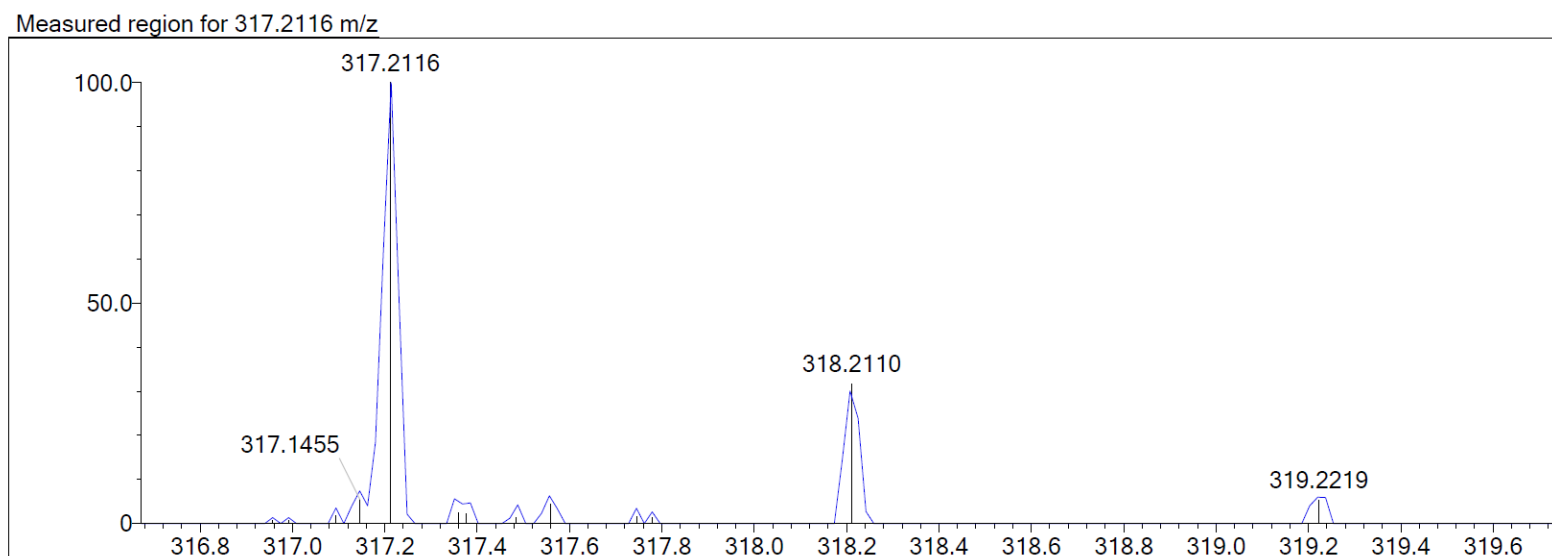

SPECTRUM -

simulation :

| m/z      | Theo. Mass | Delta (ppm) | RDB equiv. | Composition                                    |
|----------|------------|-------------|------------|------------------------------------------------|
| 317.2116 | 317.2122   | -1.89       | 6.0        | C <sub>20</sub> H <sub>29</sub> O <sub>3</sub> |

**Figure S98.** The HRESIMS Spectroscopic Data of Compound **13**

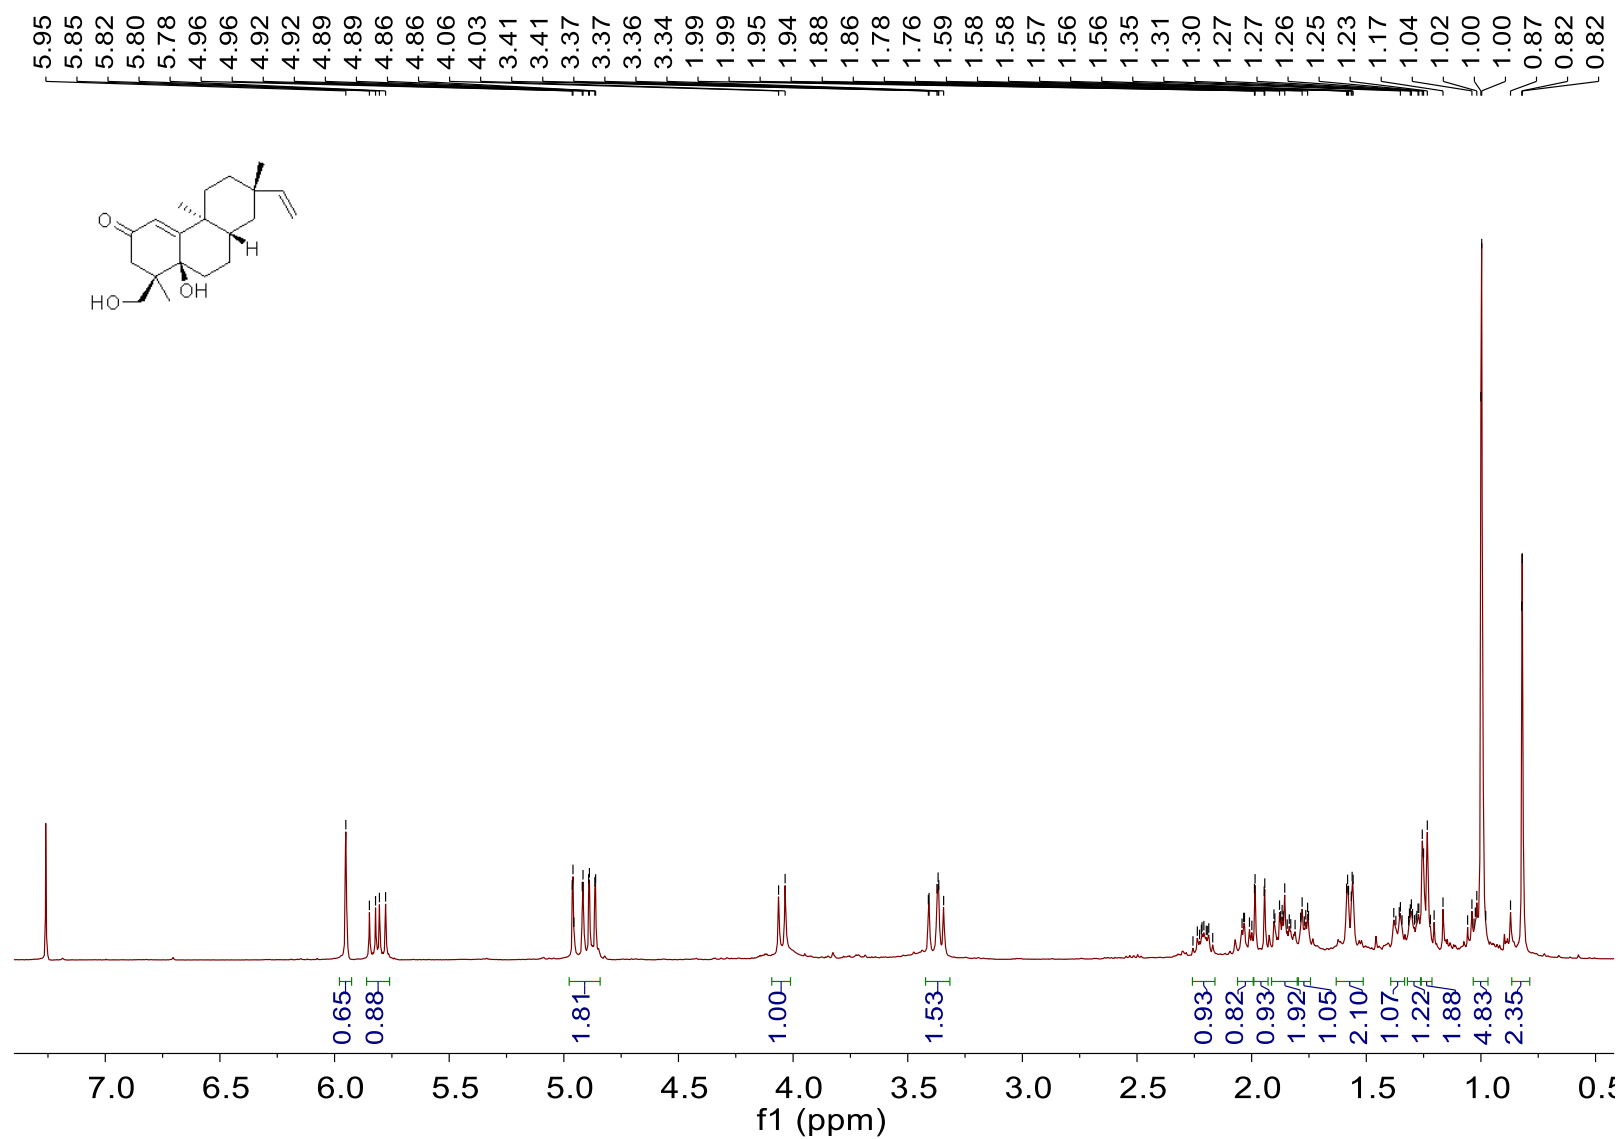

**Figure S99.** The <sup>1</sup>H NMR Spectrum of Compound **13** in CDCl<sub>3</sub>

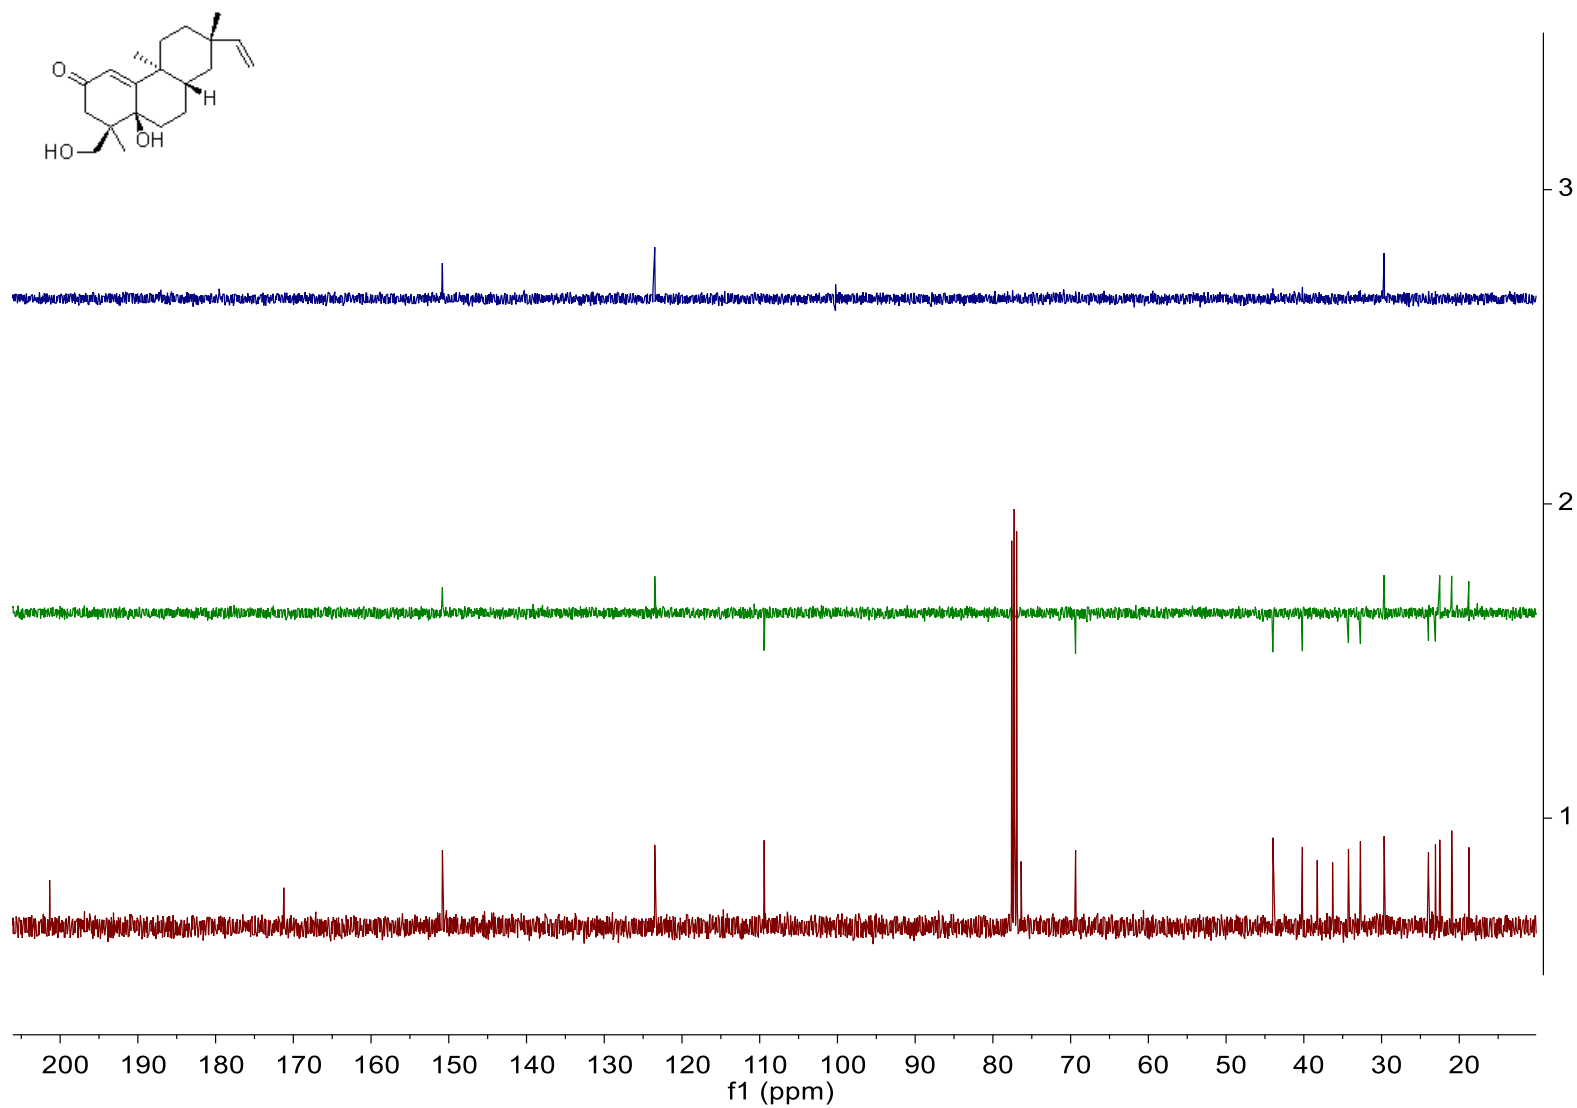

**Figure S100.** The  $^{13}\text{C}$  NMR Spectrum of Compound **13** in  $\text{CDCl}_3$

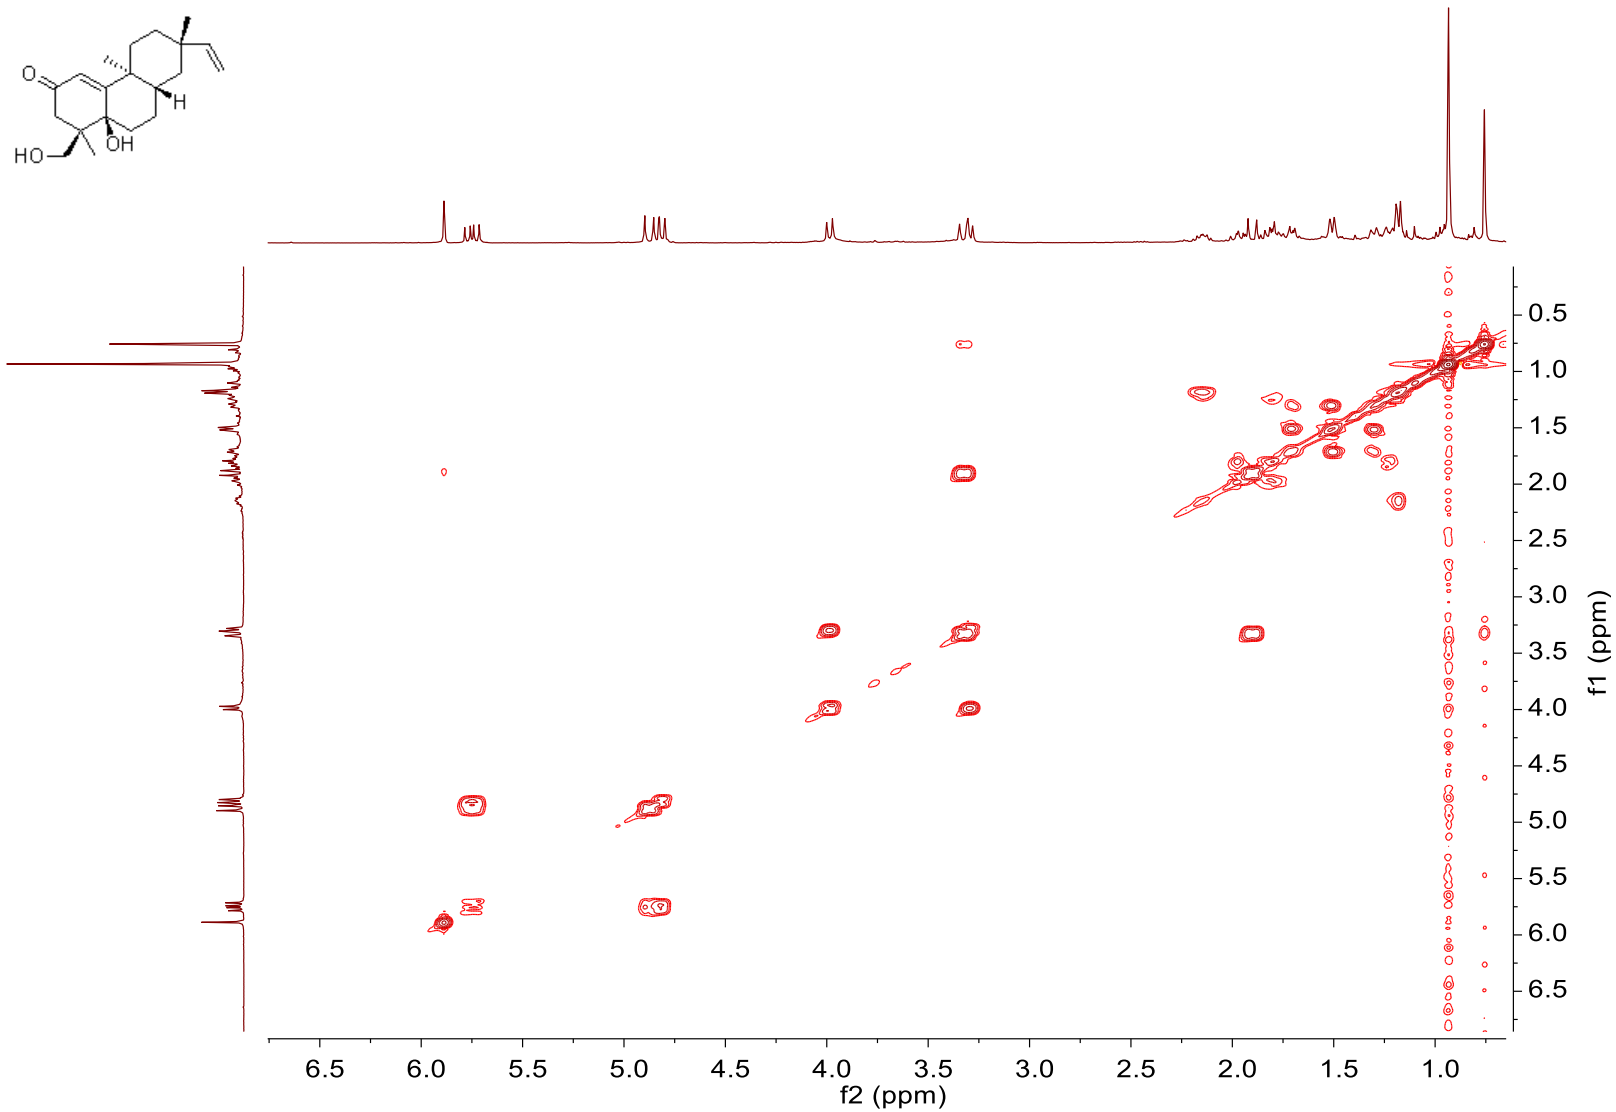

**Figure S101.** The  $^1\text{H}$ - $^1\text{H}$  COSY Spectrum of Compound **13** in  $\text{CDCl}_3$

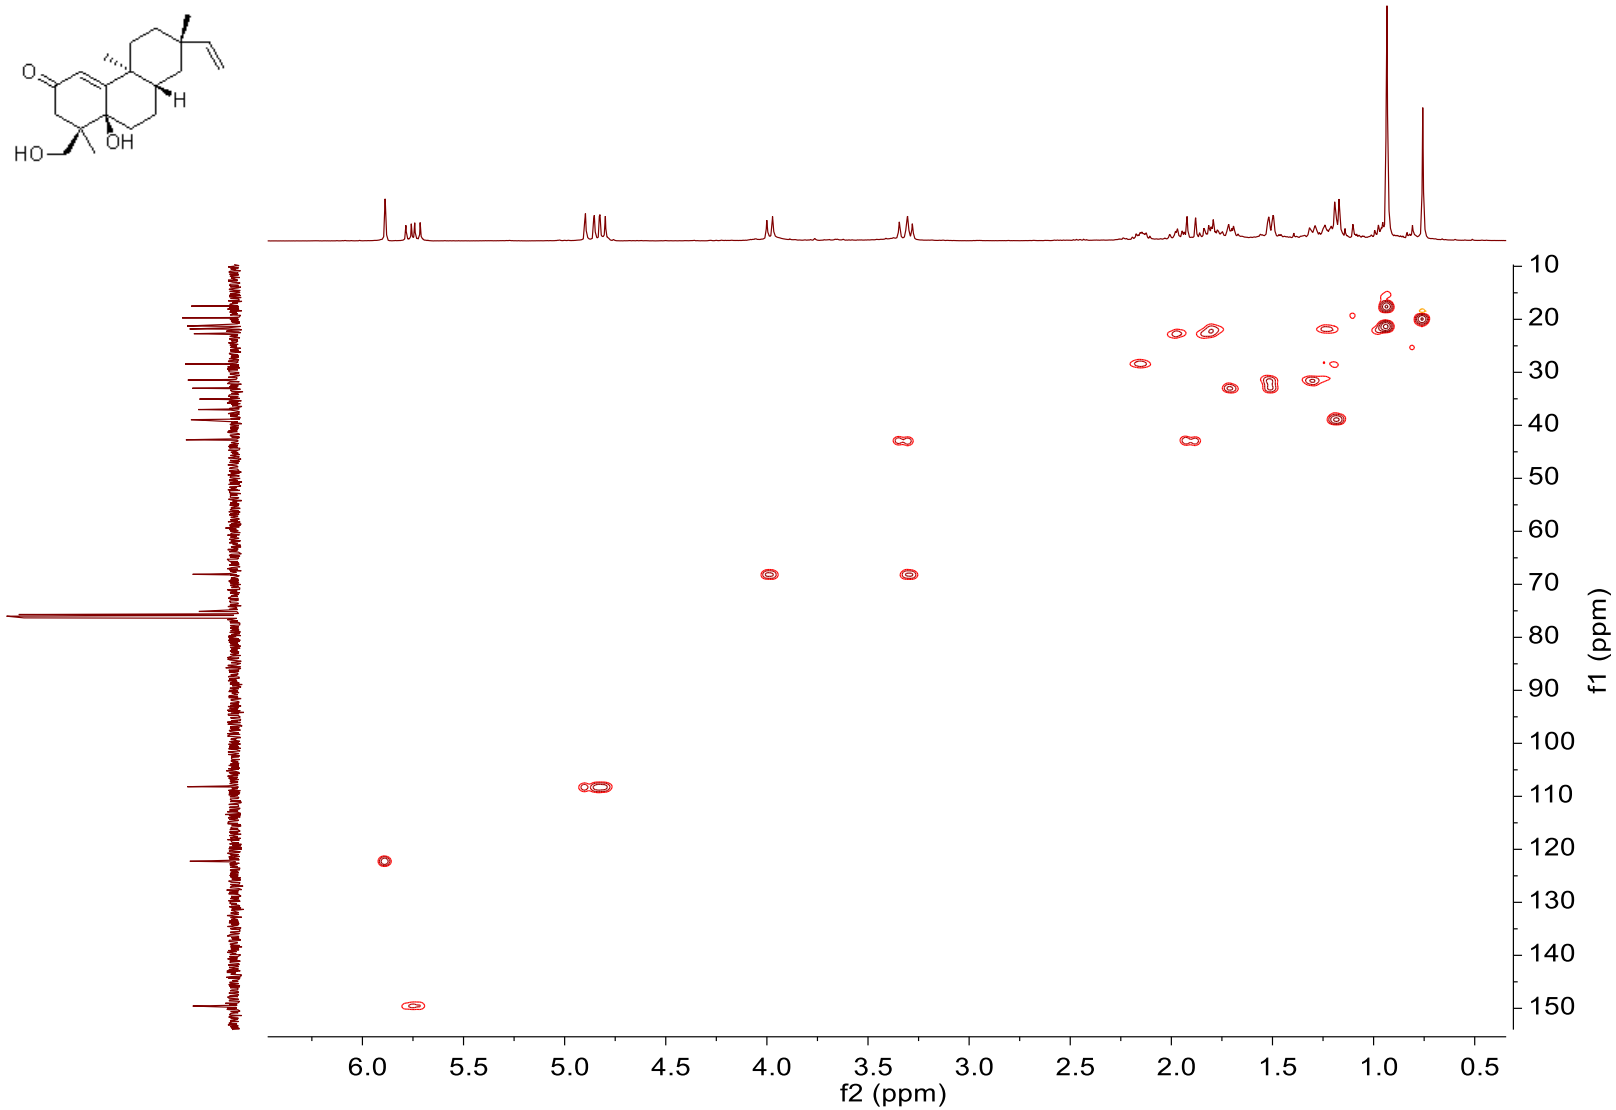

**Figure S102.** The HSQC Spectrum of Compound **13** in CDCl<sub>3</sub>

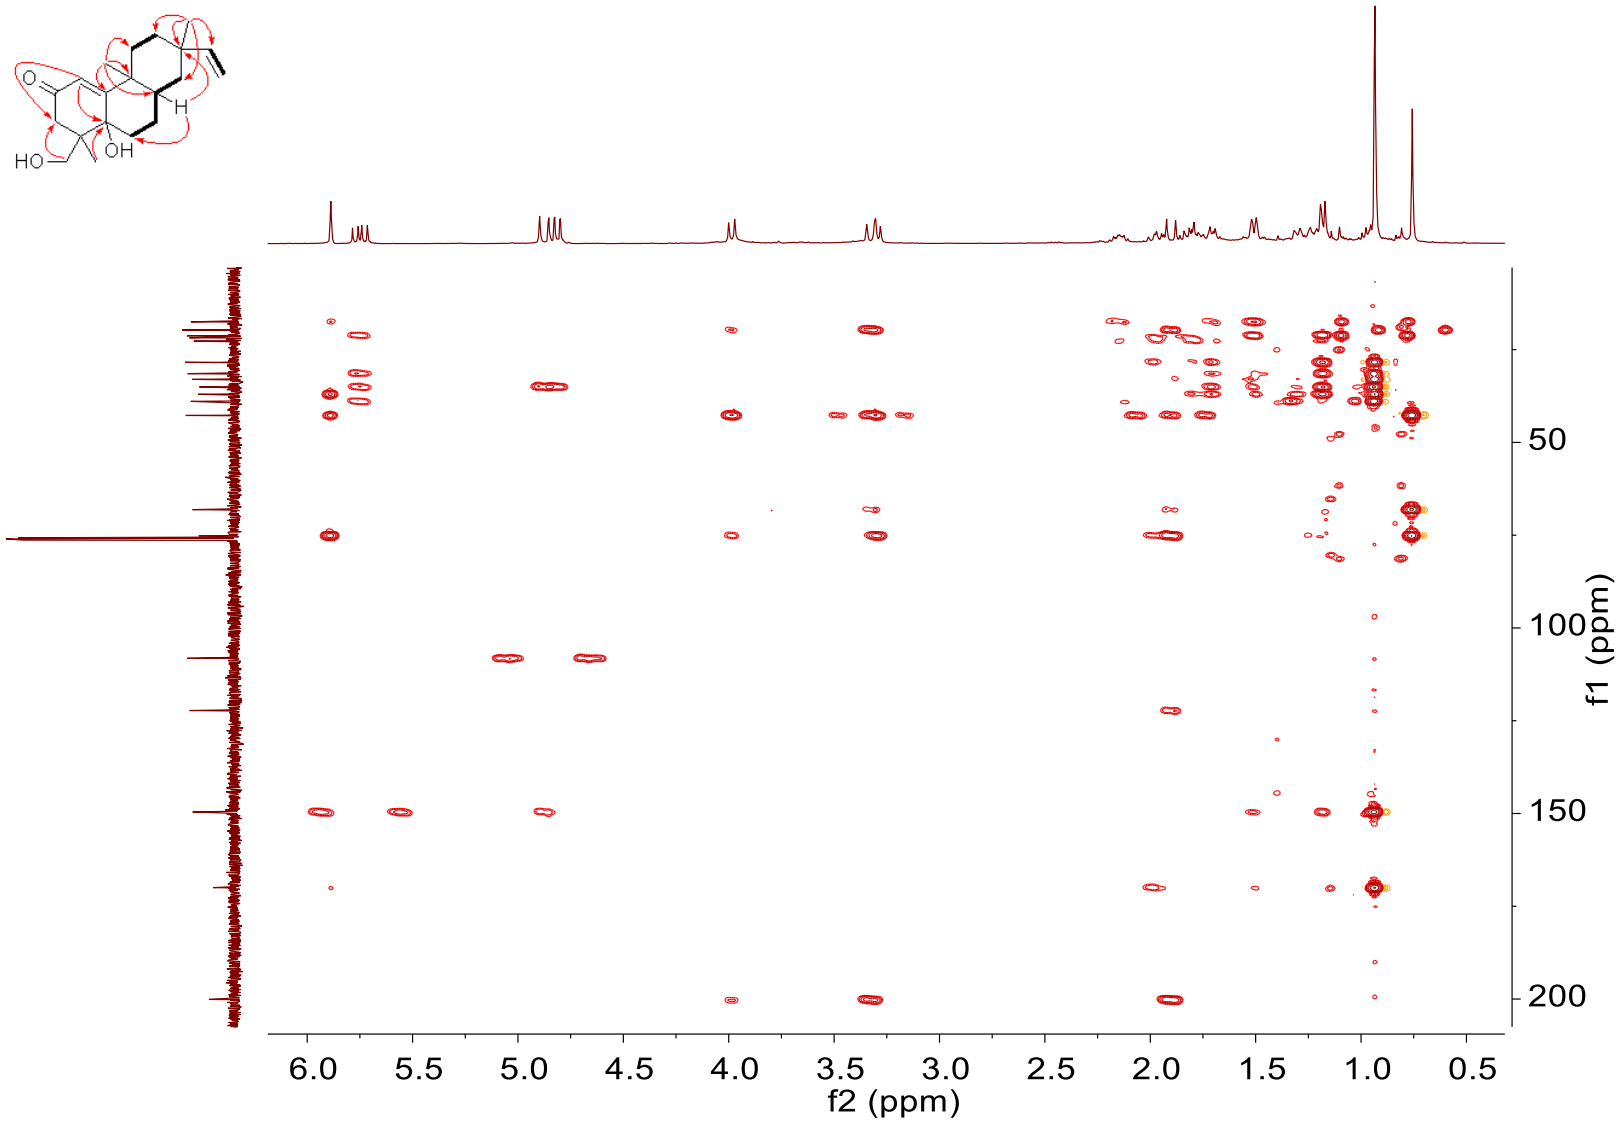

**Figure S103.** The HMBC Spectrum of Compound **13** in  $\text{CDCl}_3$



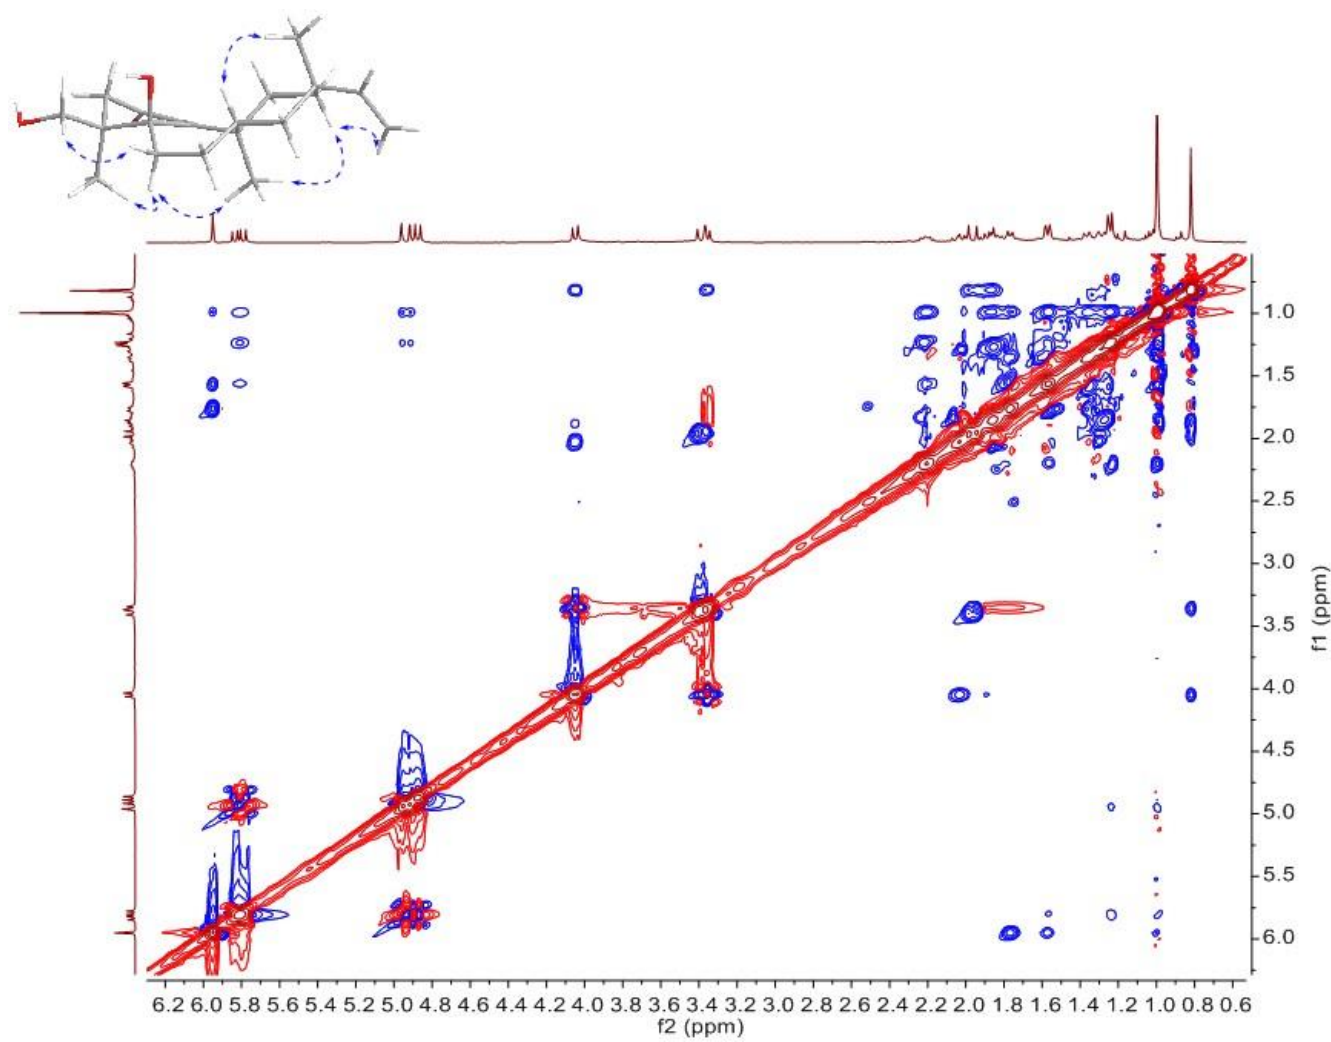

**Figure S104.** The NOESY Spectrum of Compound **13** in CDCl<sub>3</sub>

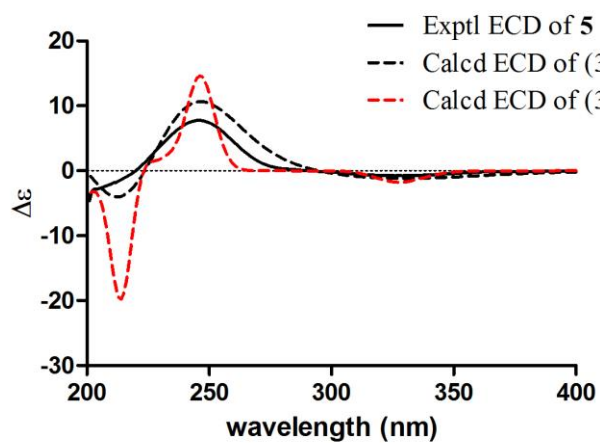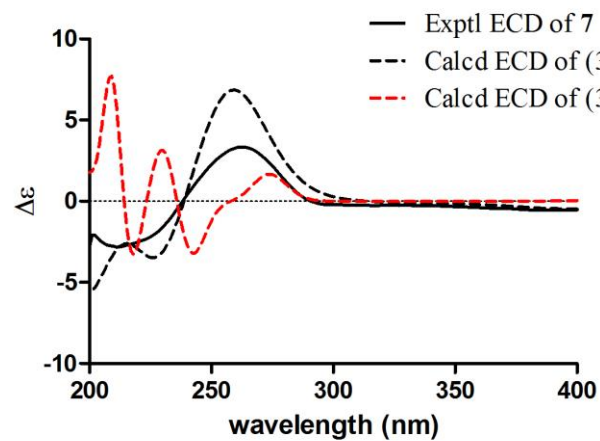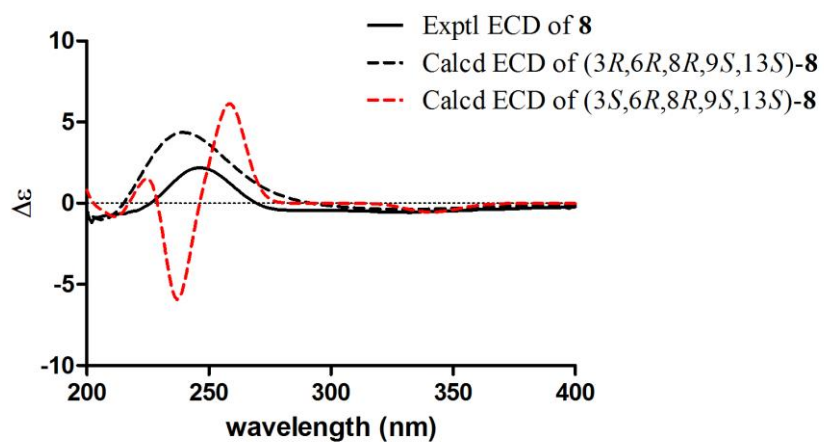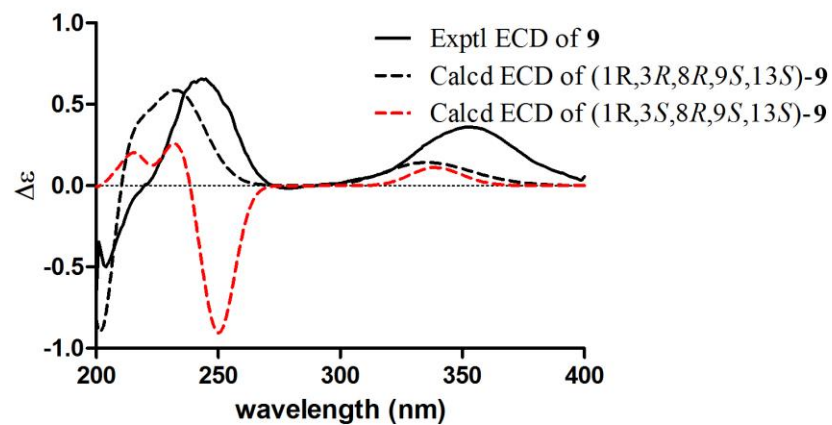

**Figure S105.** The ECD Spectrum of Compound **5**, **7-9** in MeOH

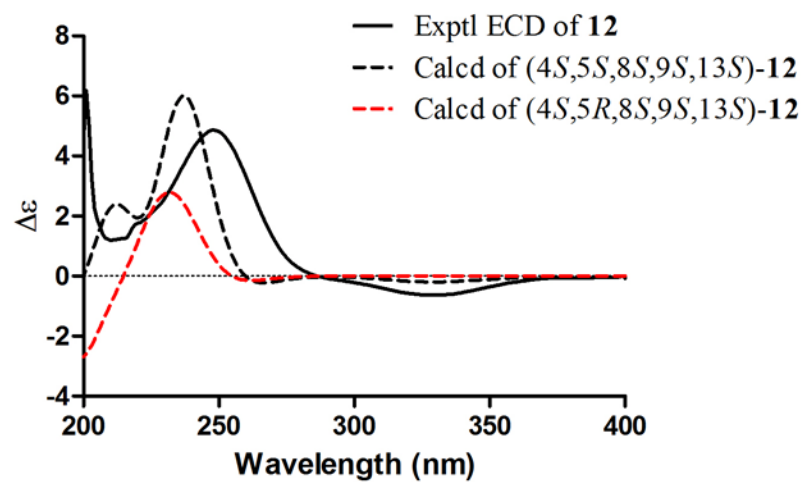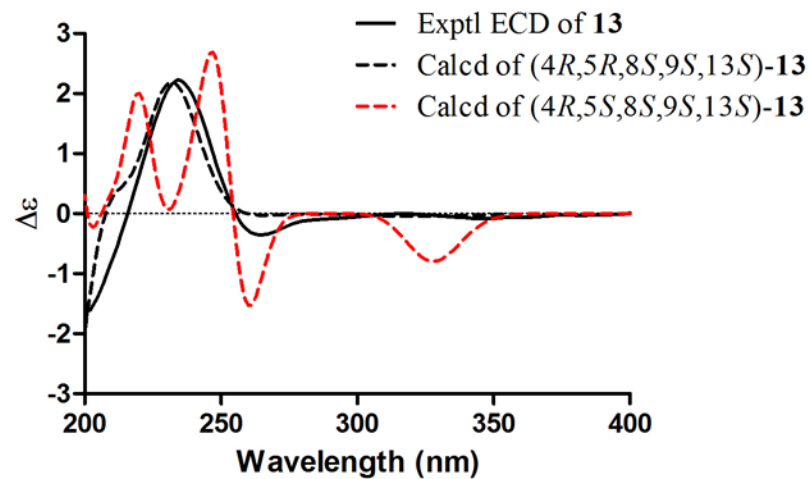

**Figure S106.** The ECD Spectra of Compounds **12** and **13** in MeOH

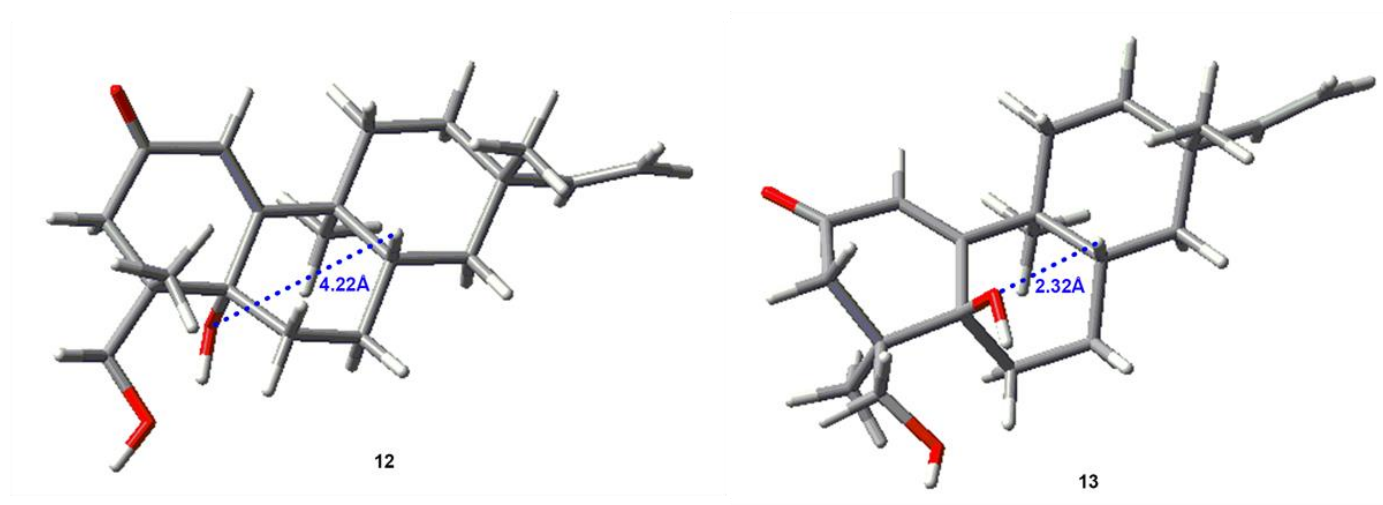

**Figure S107.** The Calculated 3D Structures of **12-13**
